# Supplementary material for: The Interplay Between Visual Traits and Forest in Bumblebee Communities Across Sweden
Source: PubMed Central journal article supplement (PMC11664236; doi:10.1002/ece3.70635), 2024-12-23

**Allometric models.** Model traces and posterior predictive check for each visual trait modelled with Bayesian inference without phylogenetic control.

Eye surface ( $\mu\text{m}^2$ )

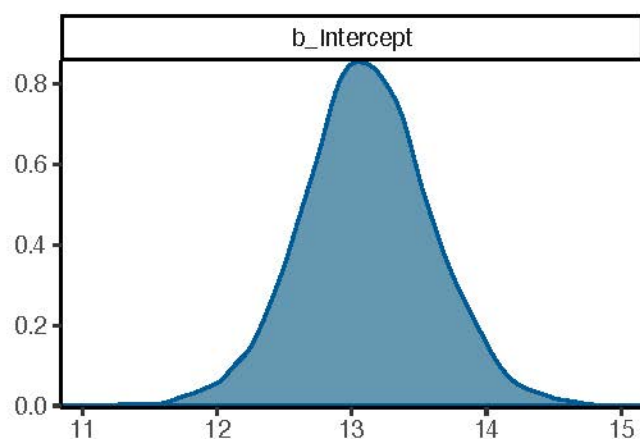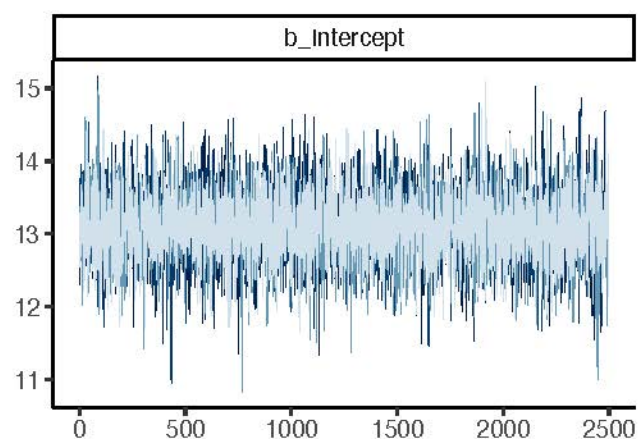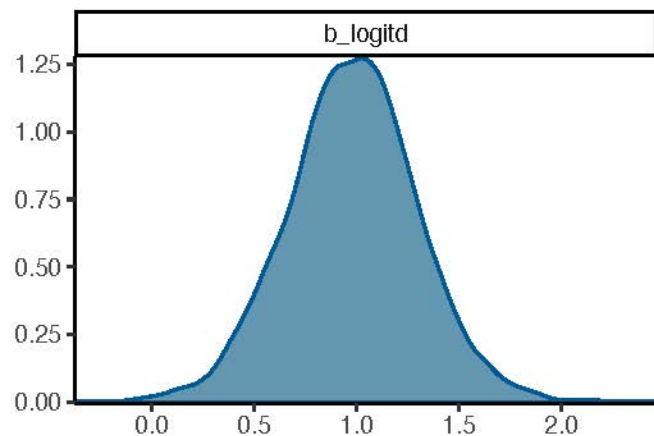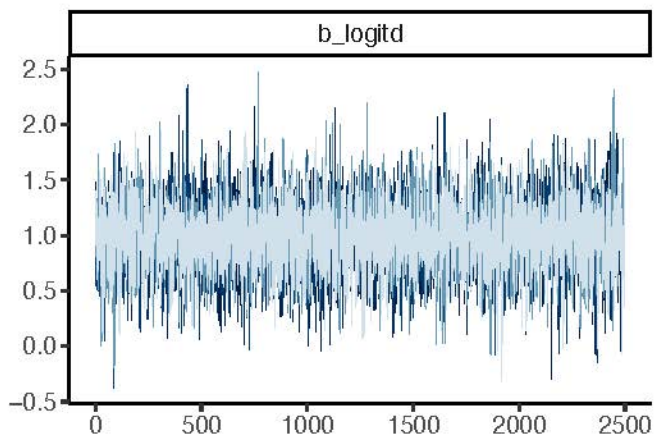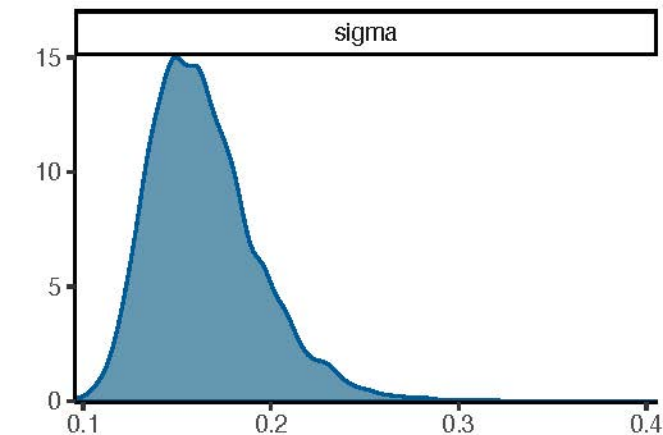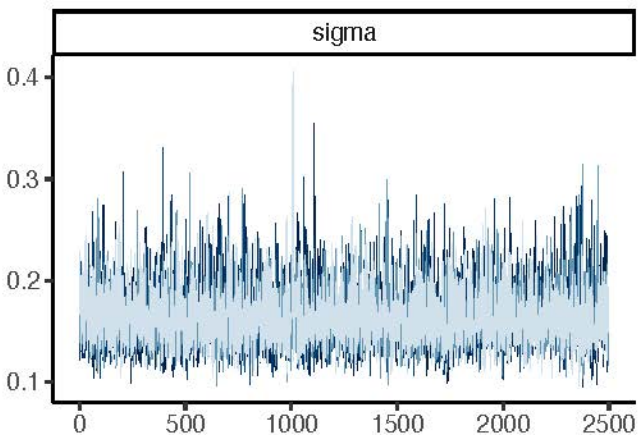

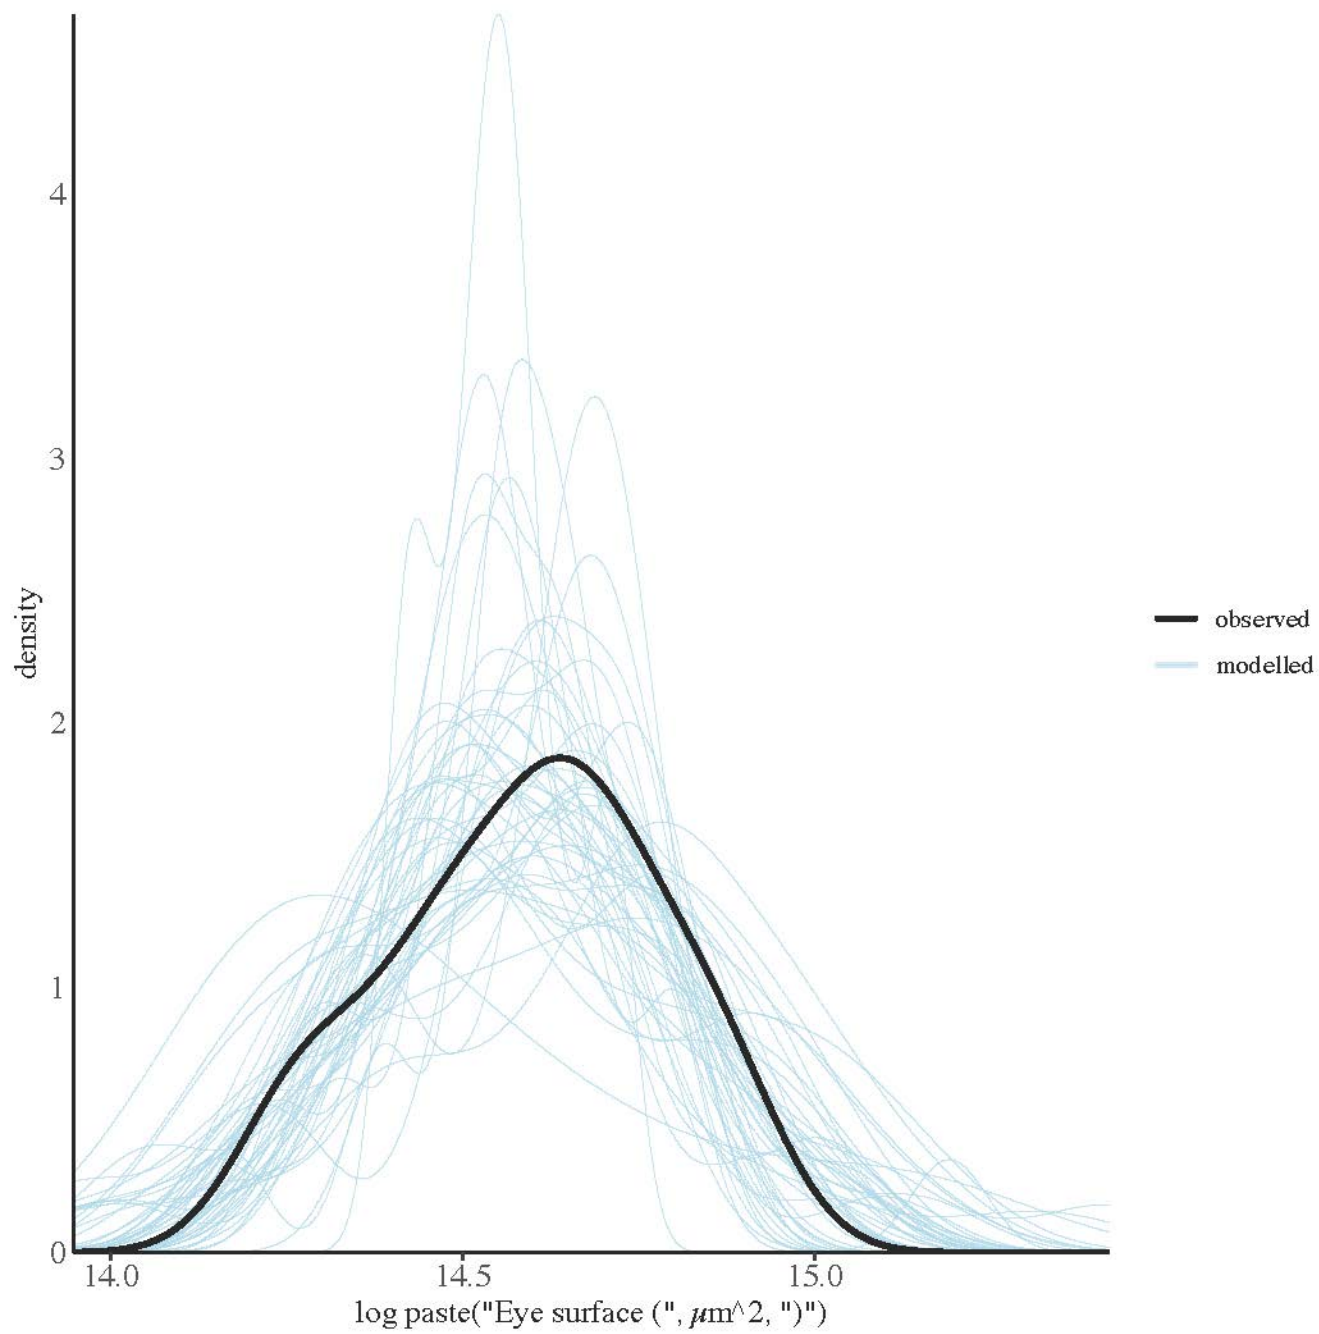



Facet diameter ( $\mu\text{m}$ )

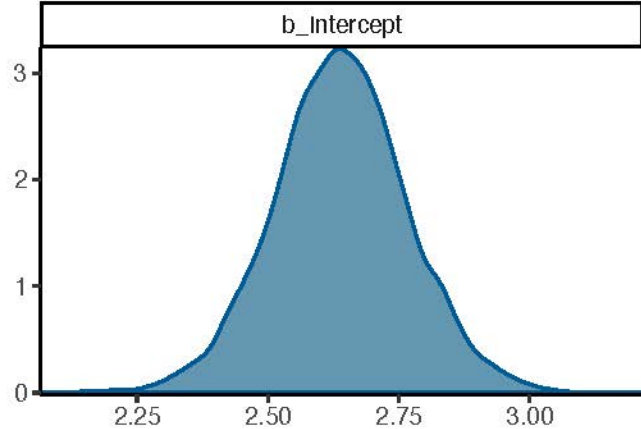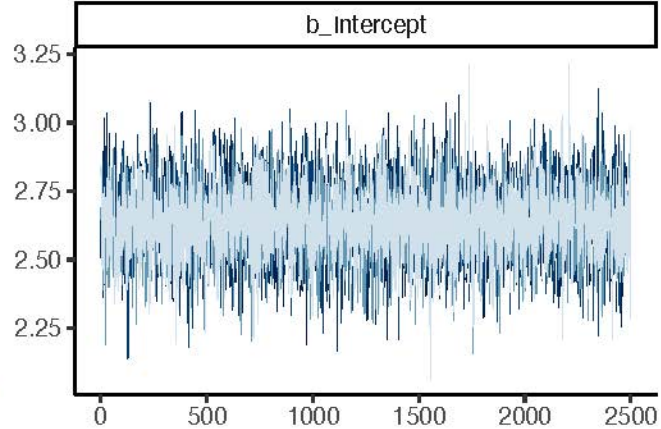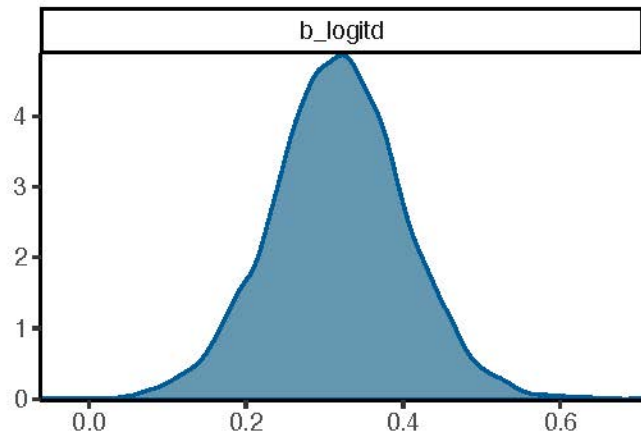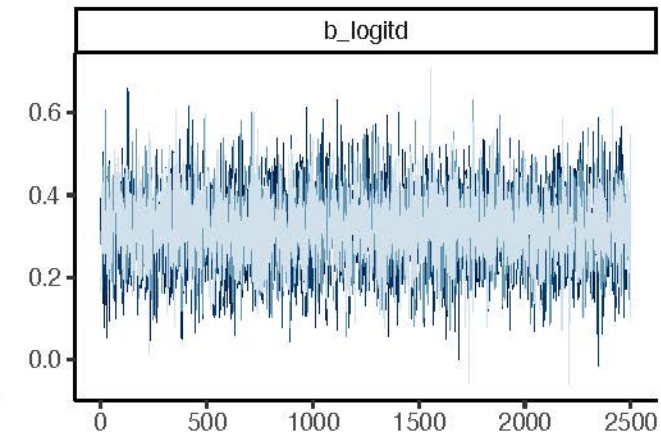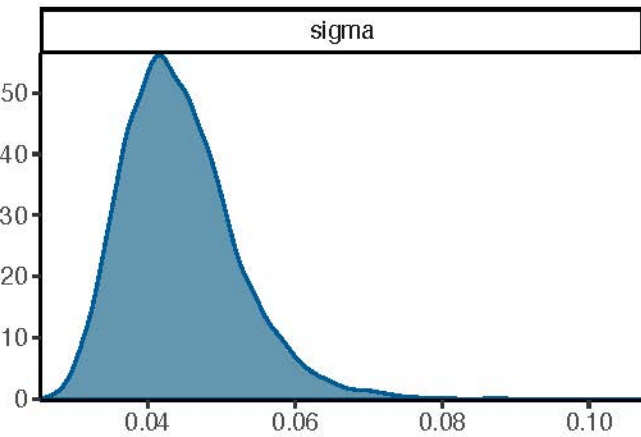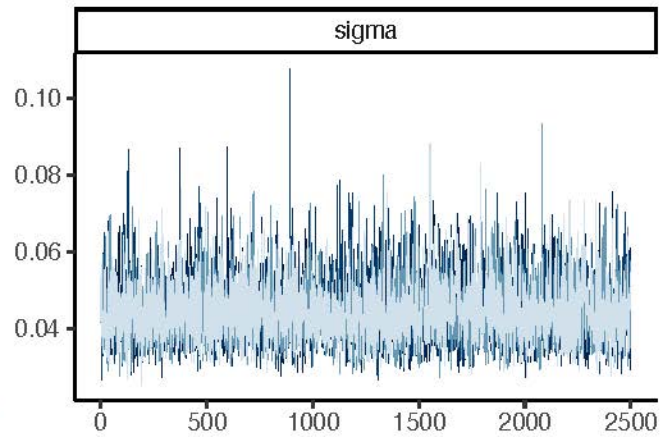

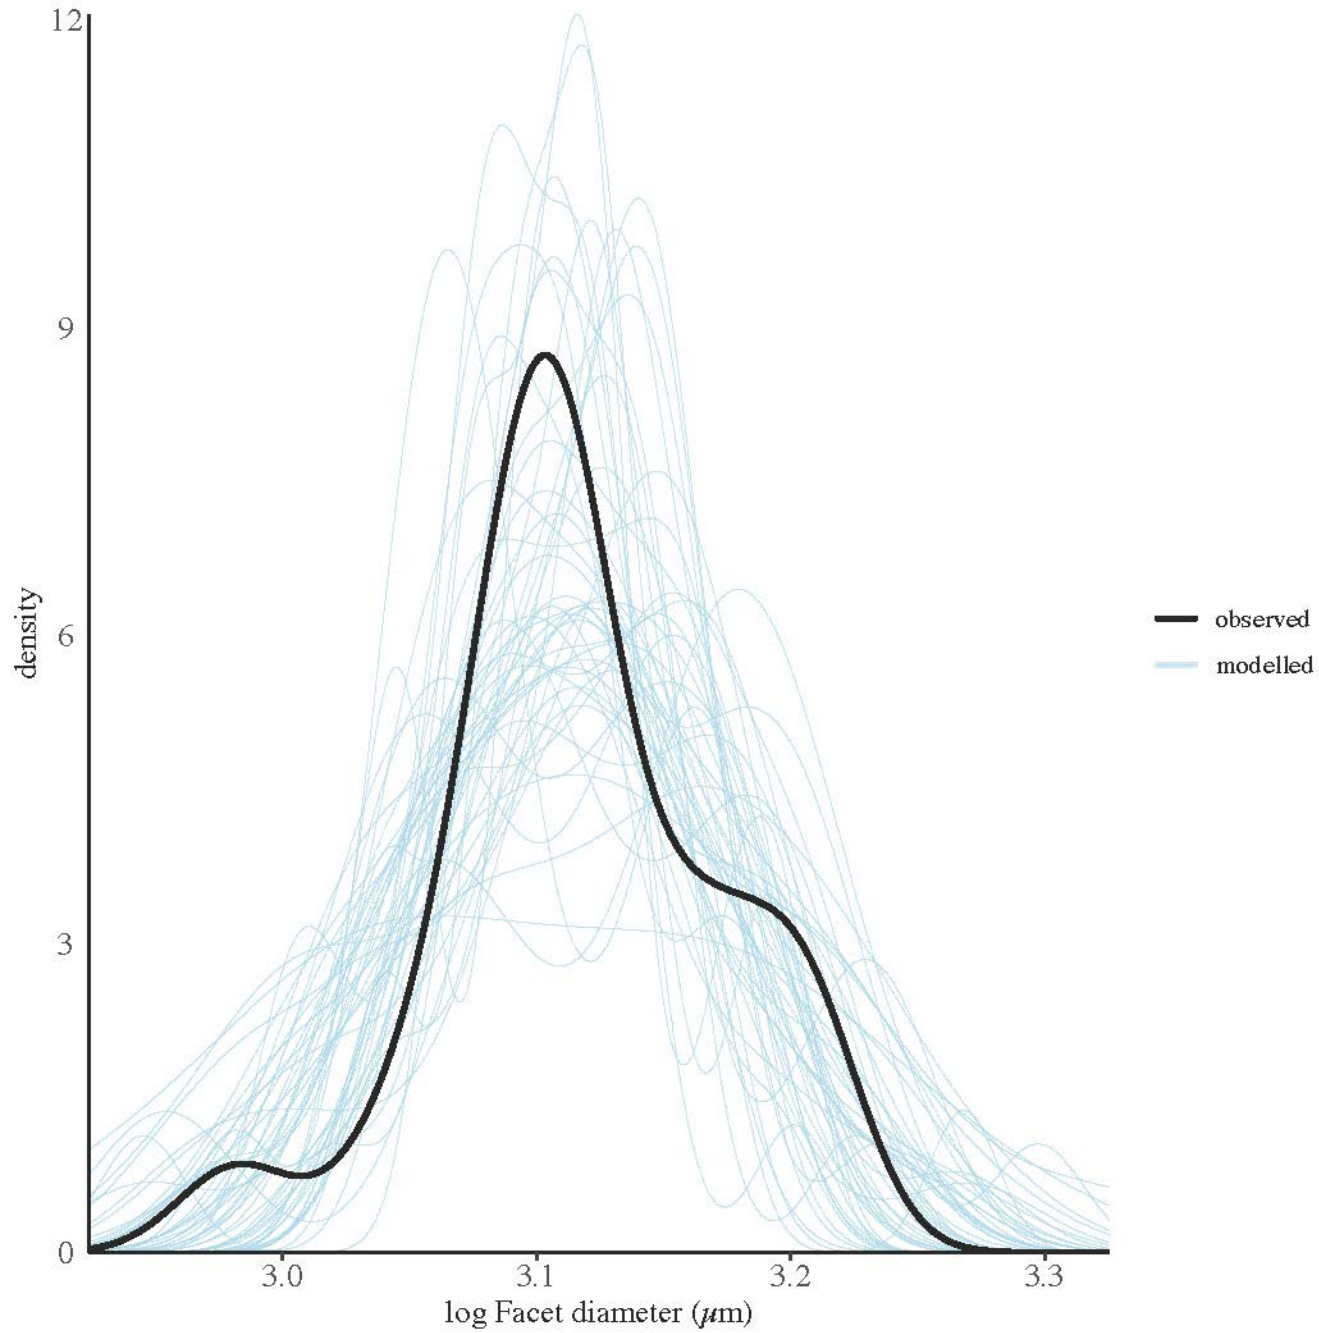

Inter-ommatidial angle (°)

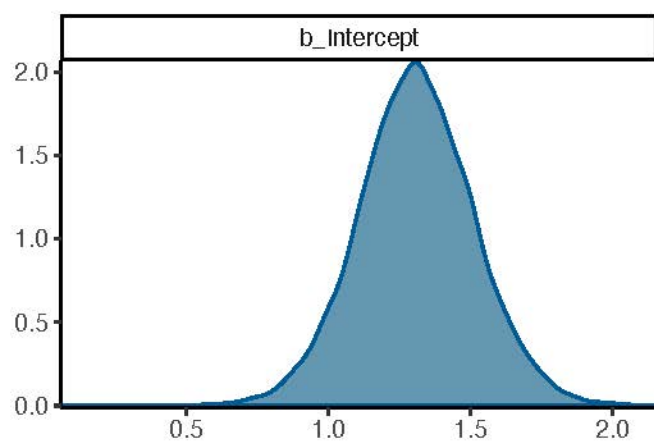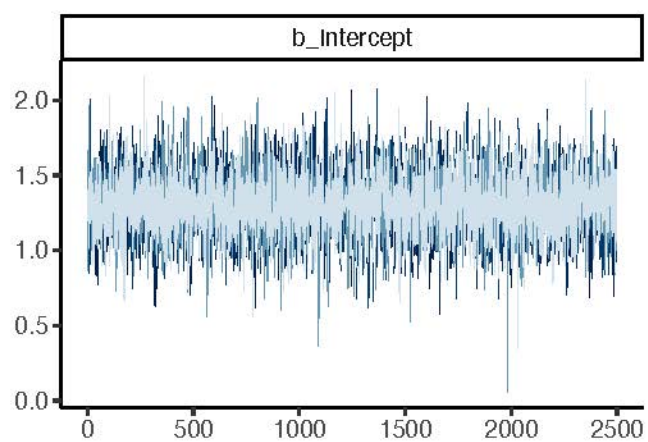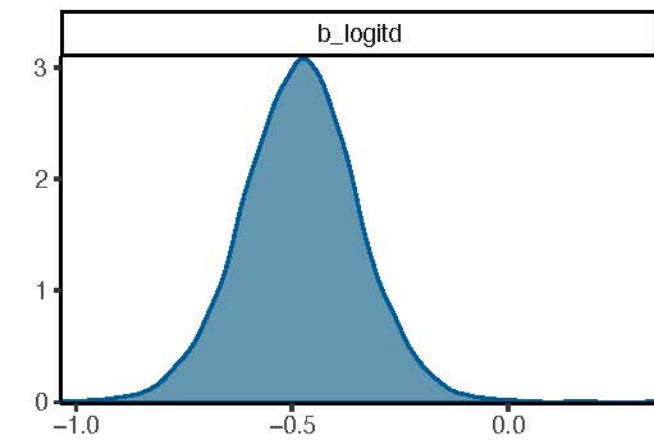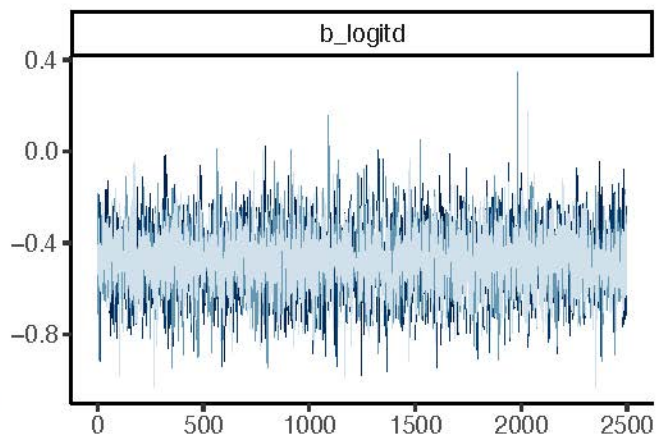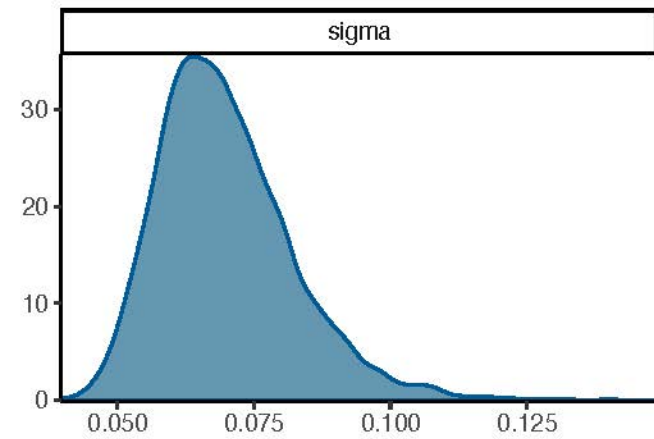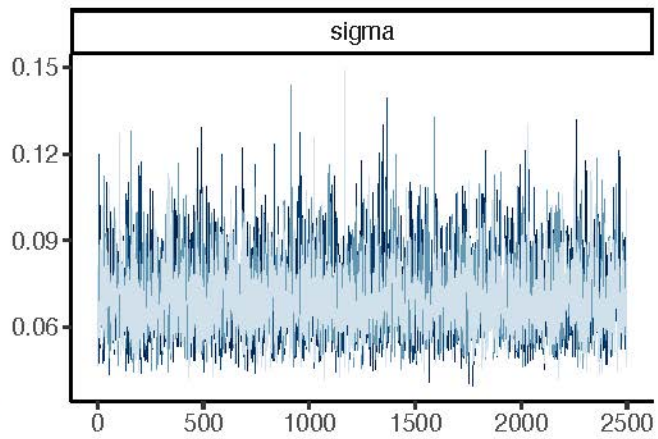

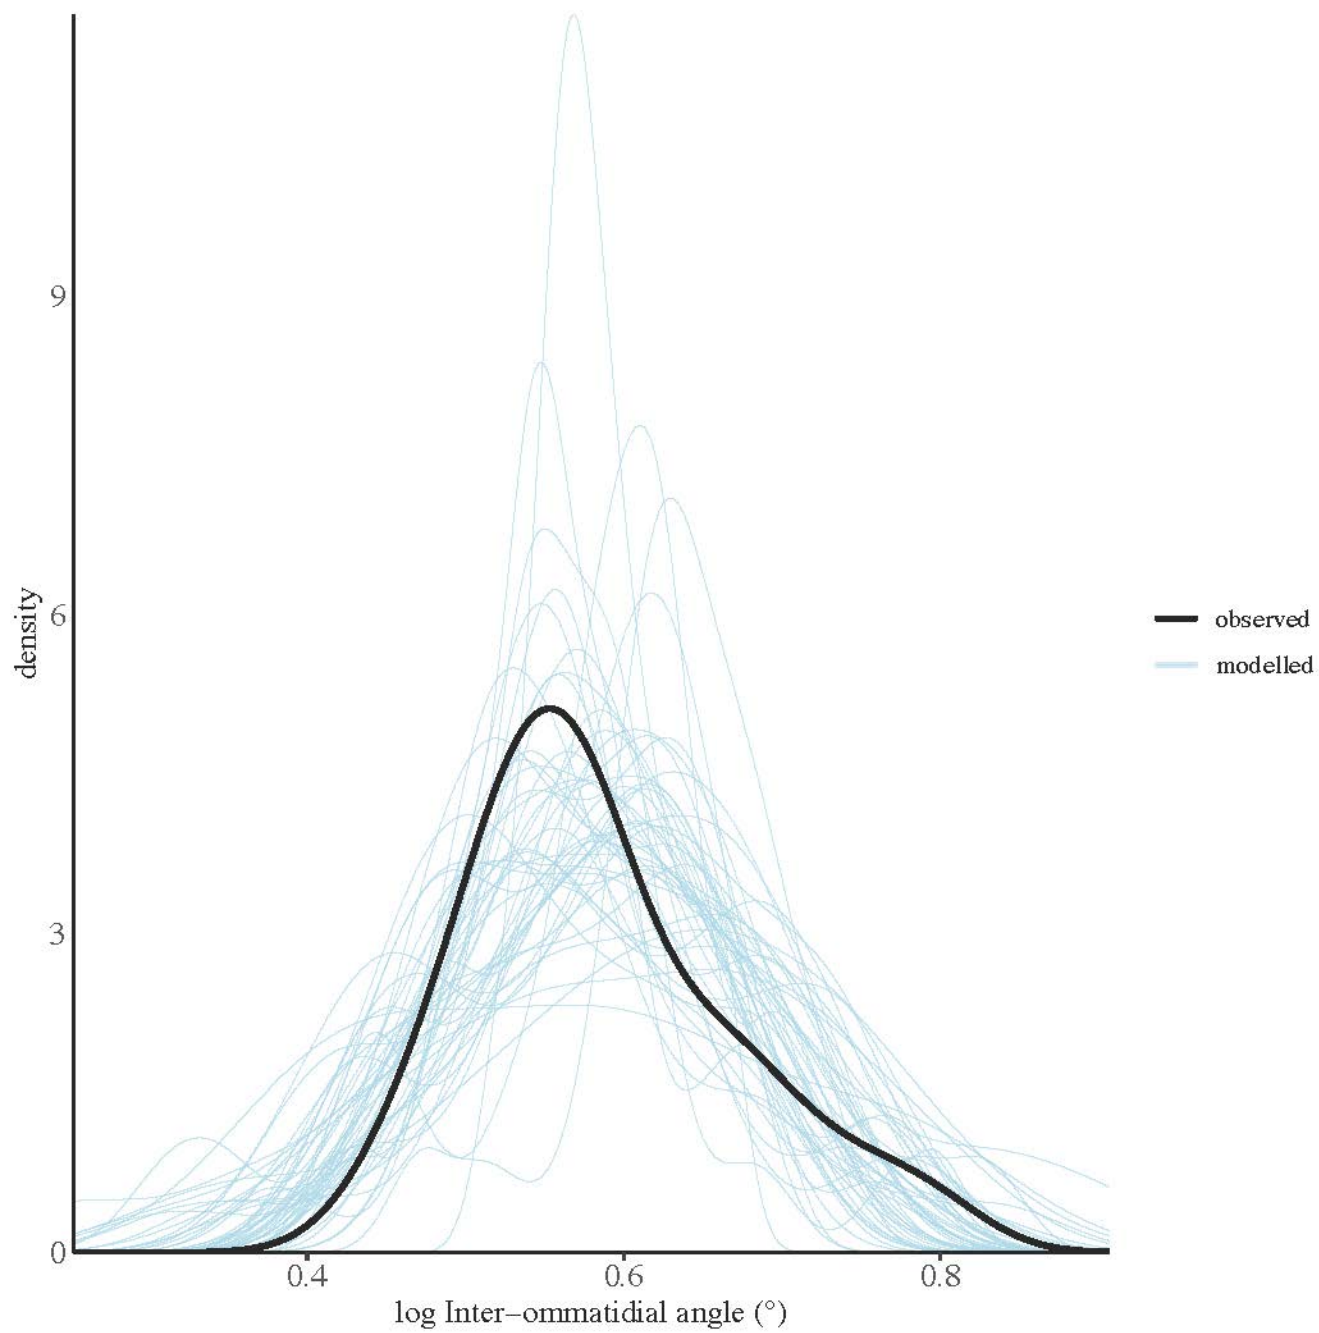

Facet number

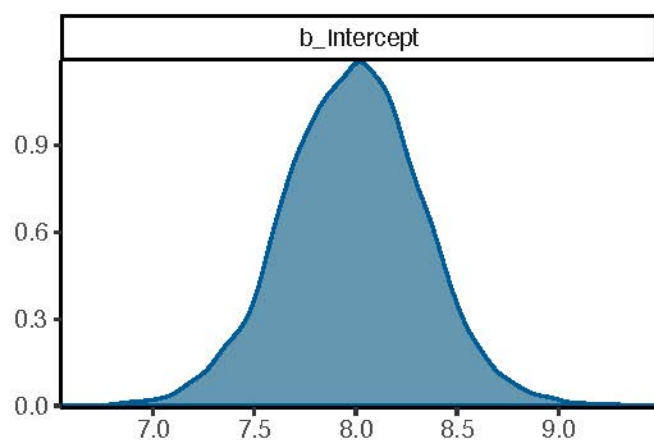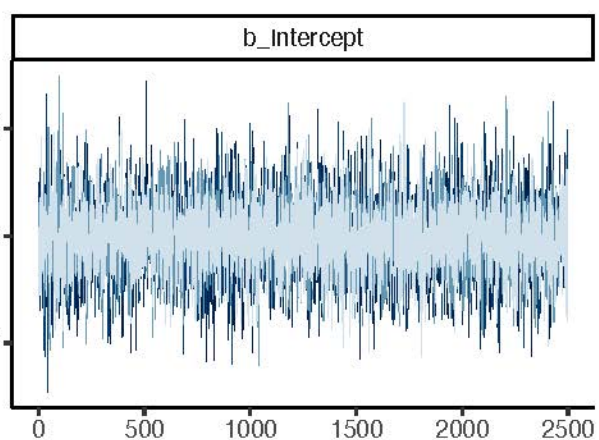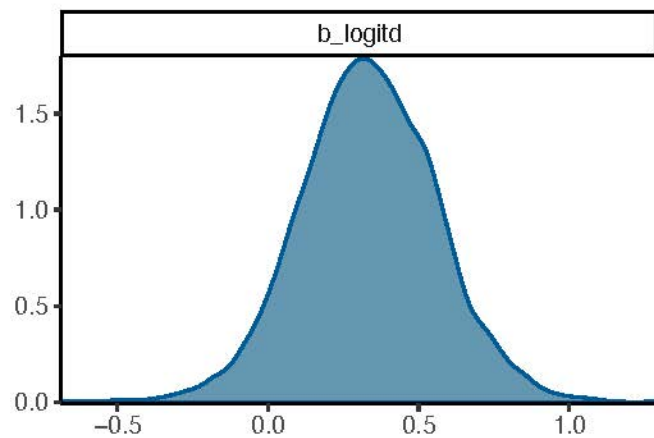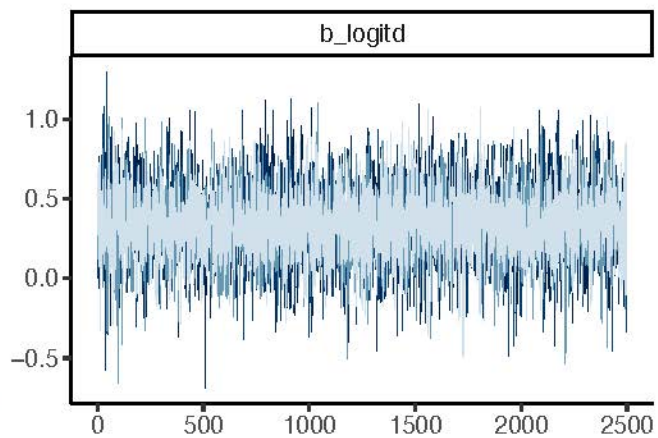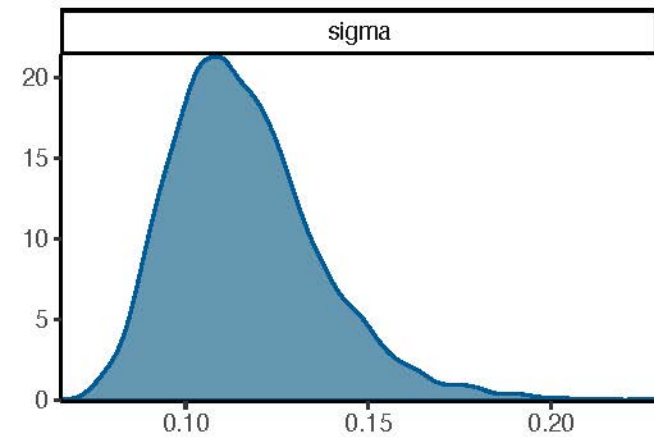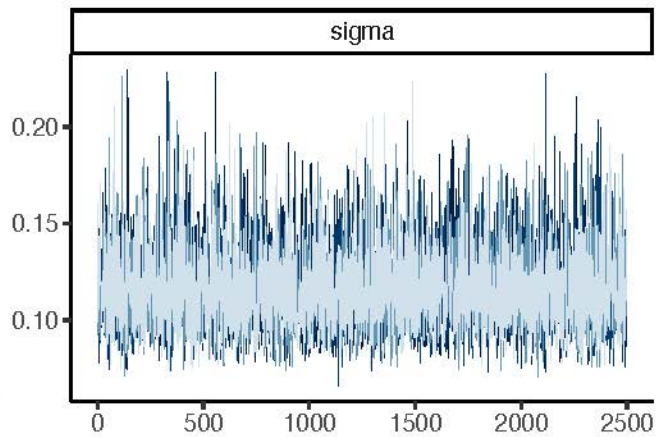



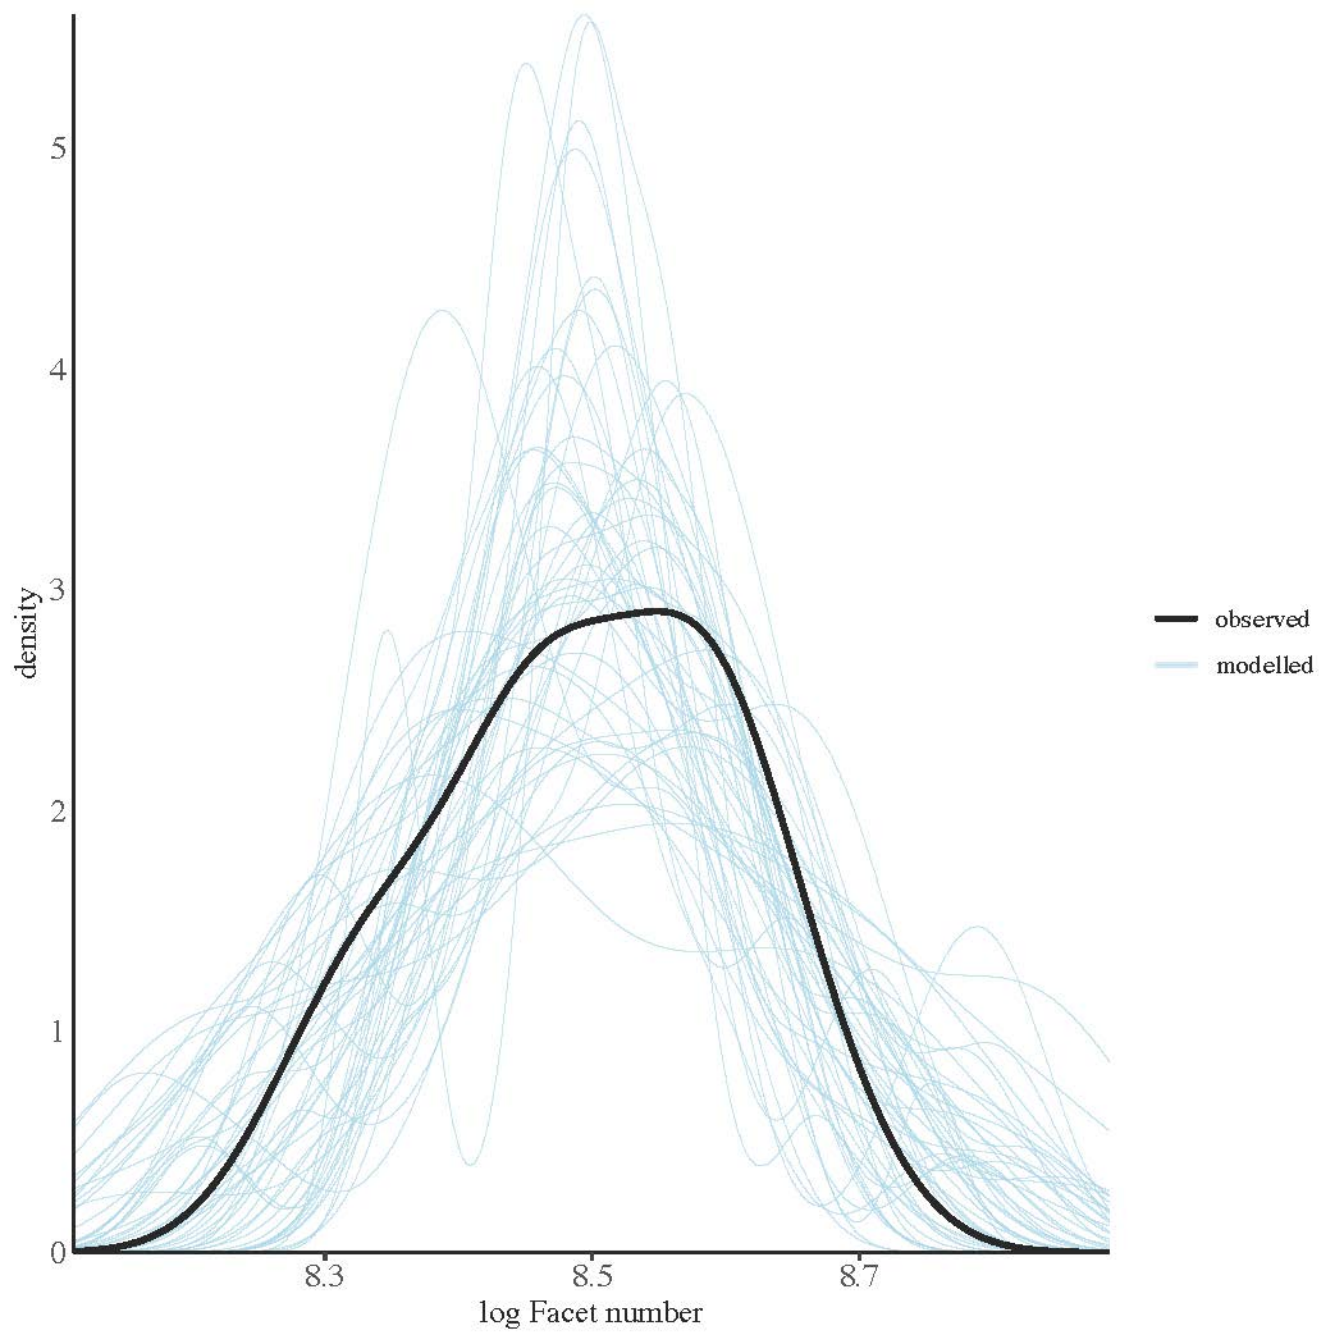

Eye parameter ( $\mu\text{m}\cdot\text{rad}$ )

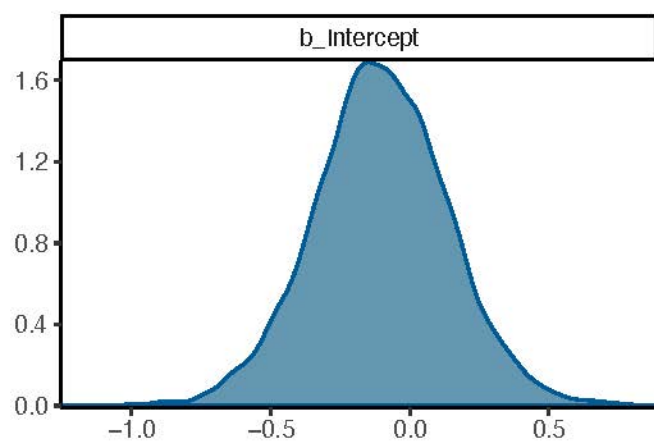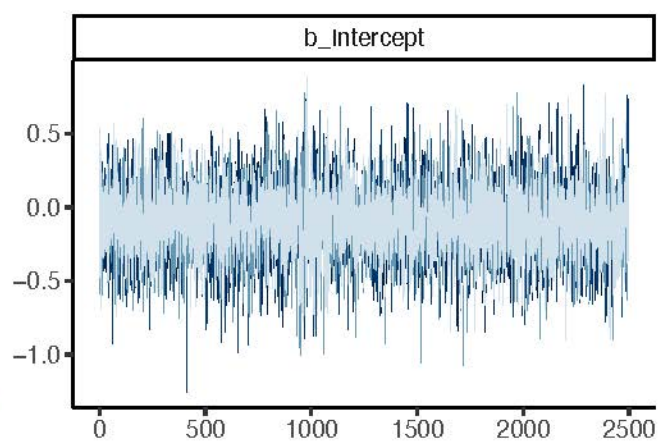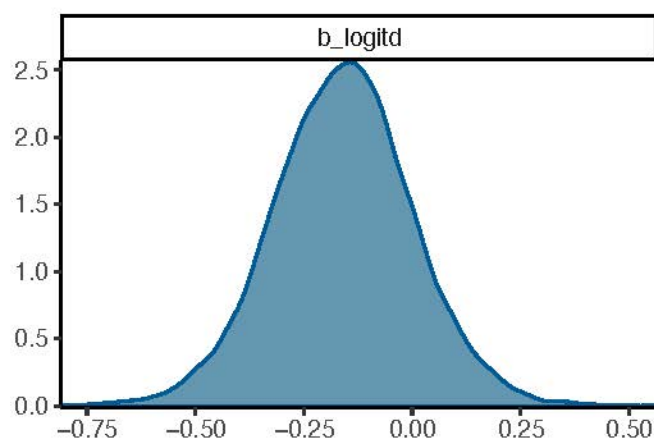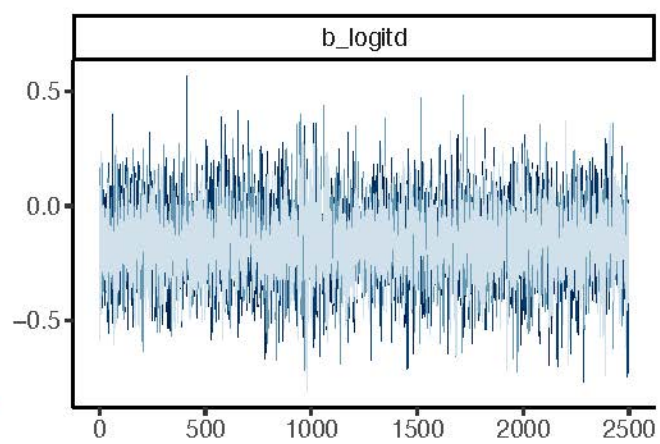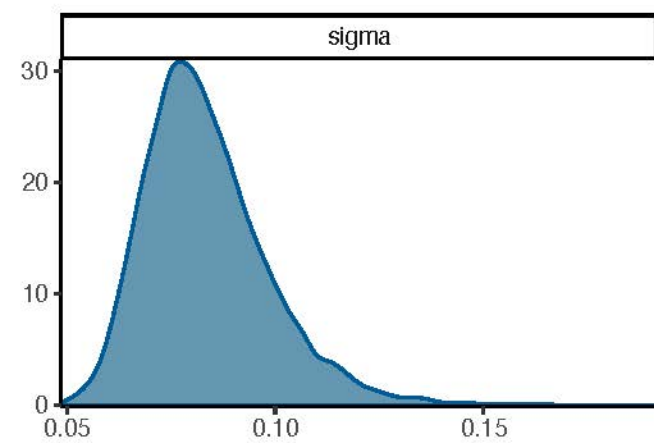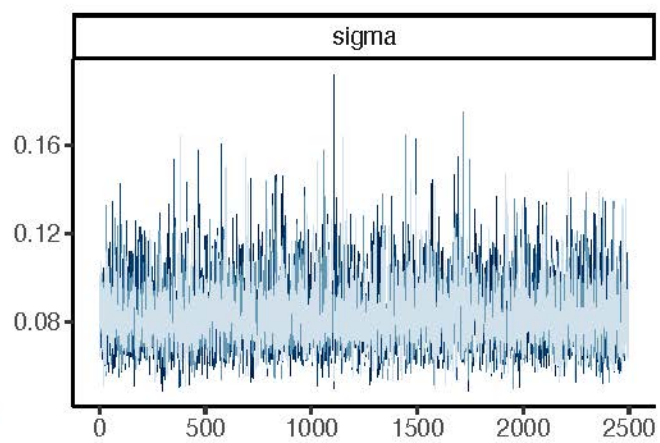

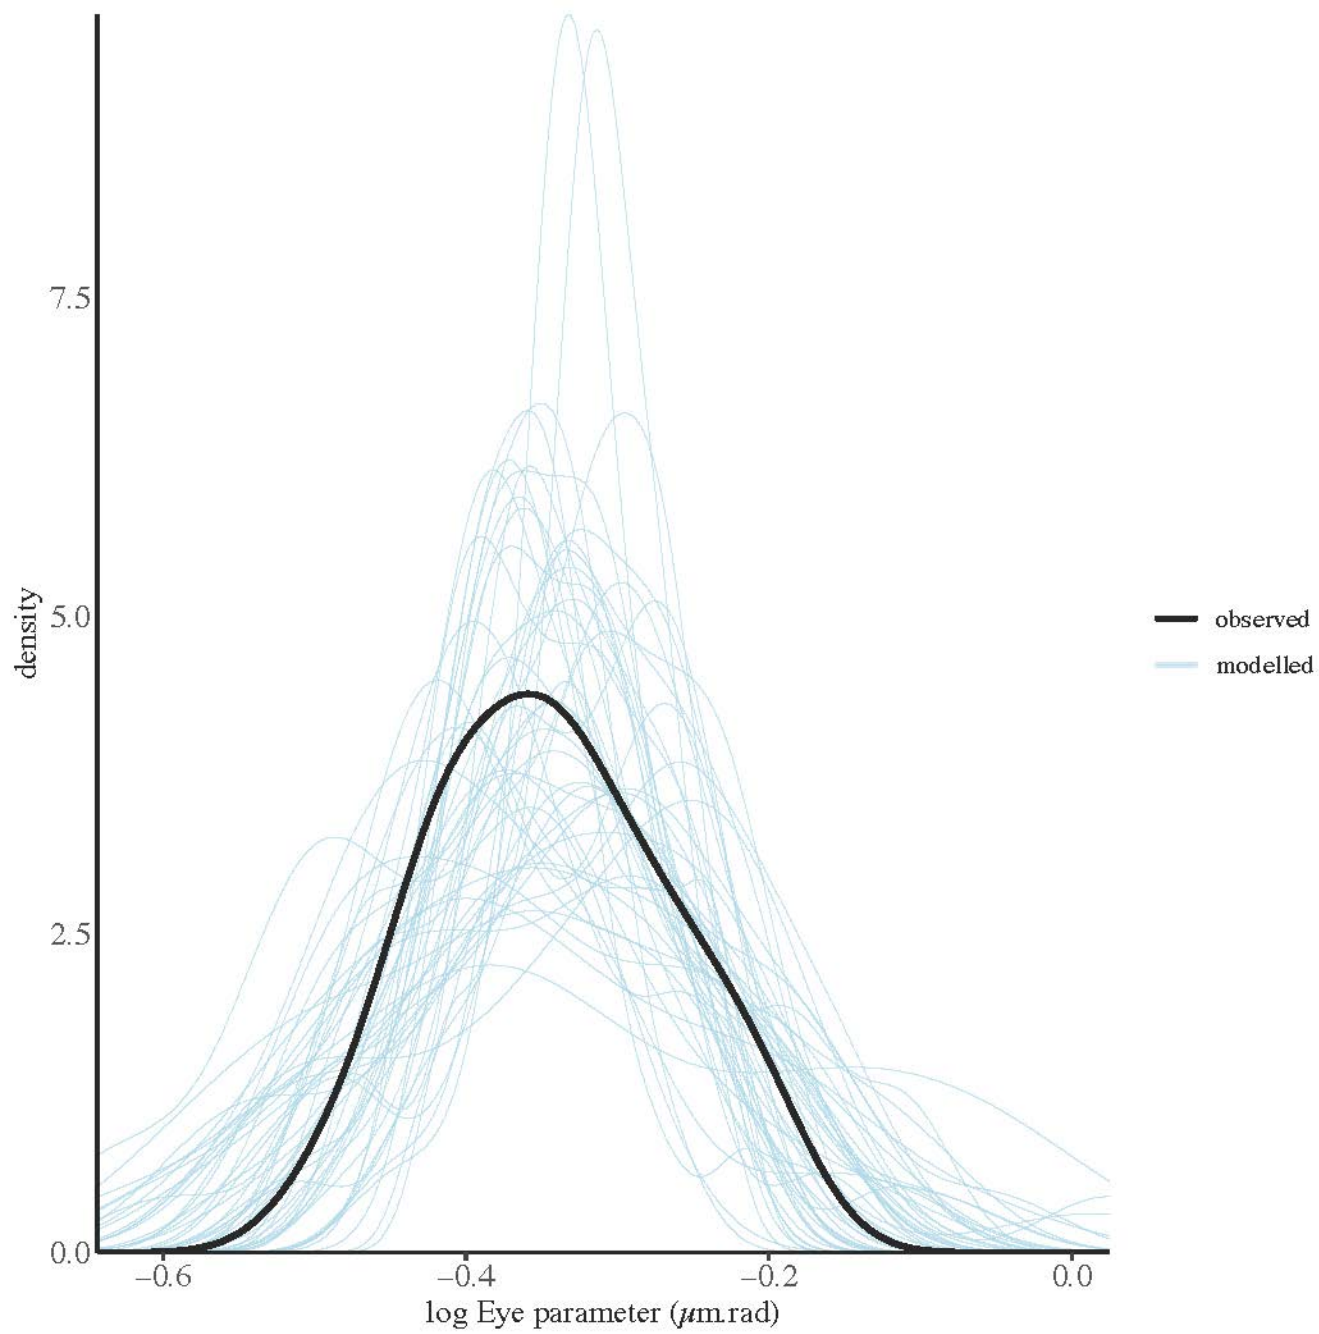

Curvature ( $\mu\text{m}$ )

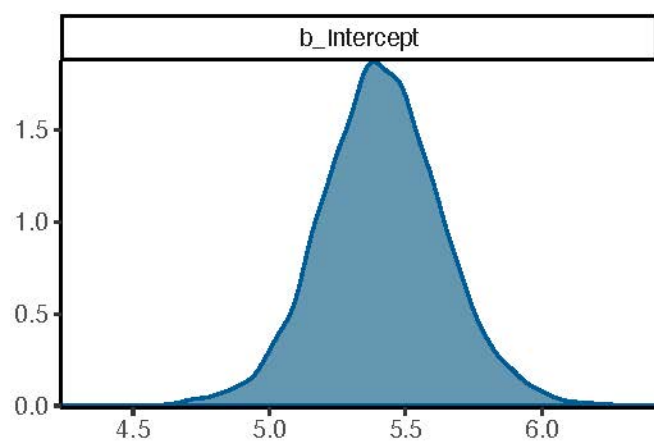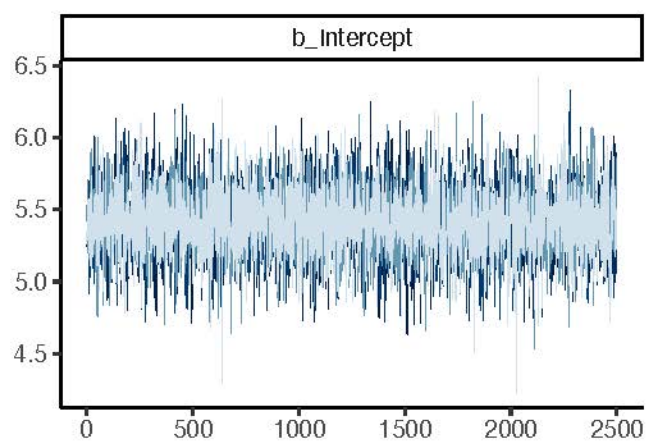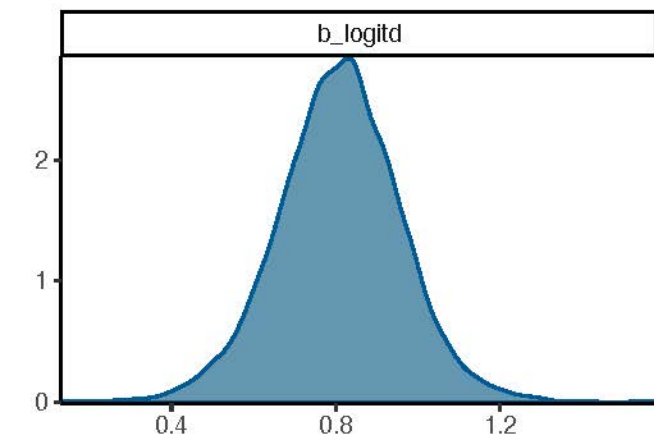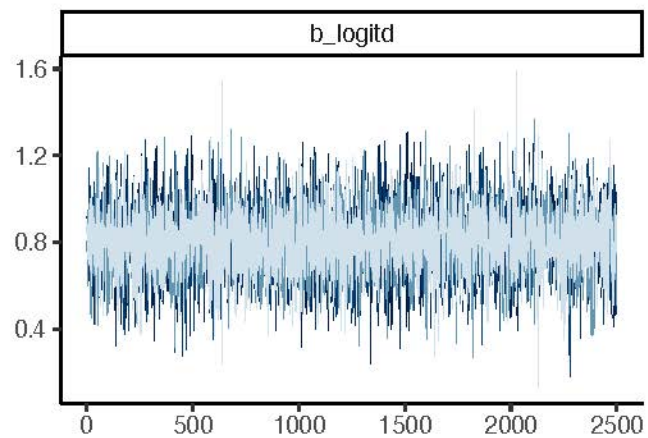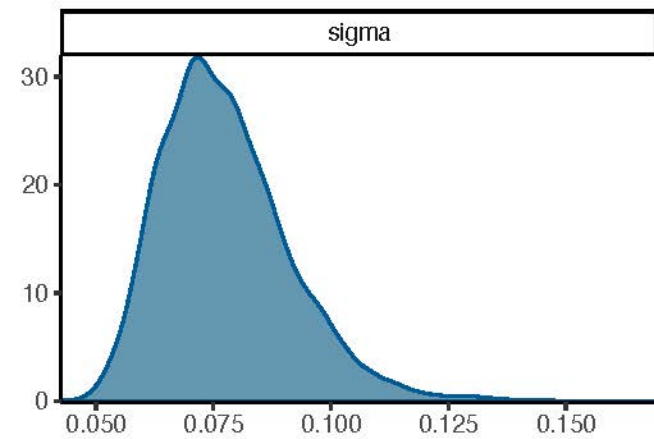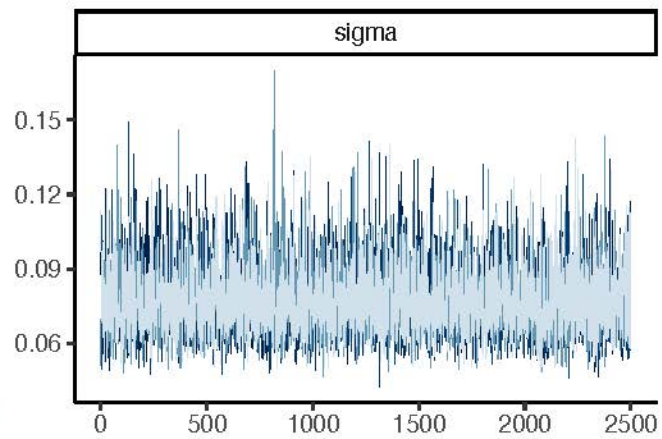

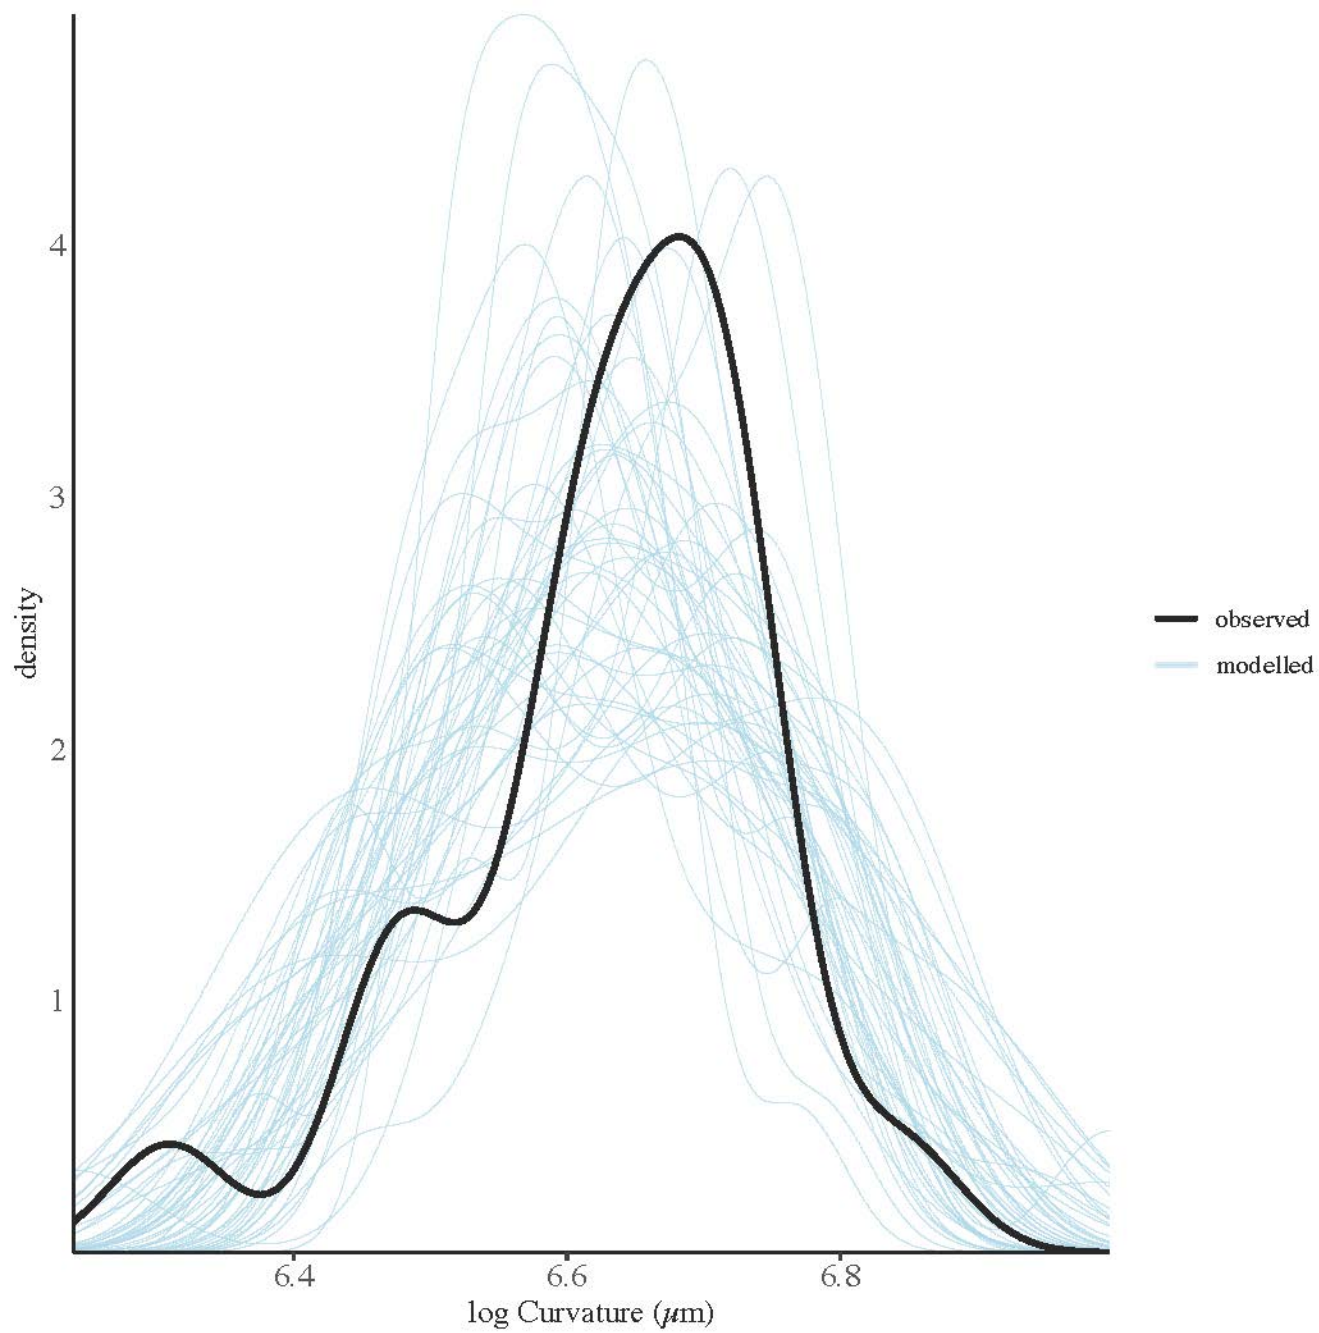

Central ocellus diameter ( $\mu\text{m}$ )



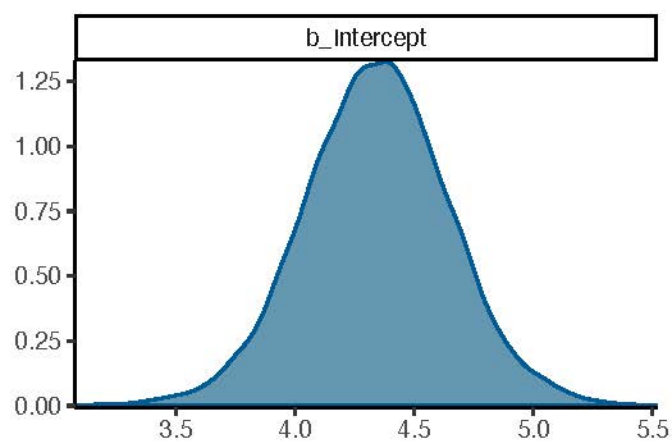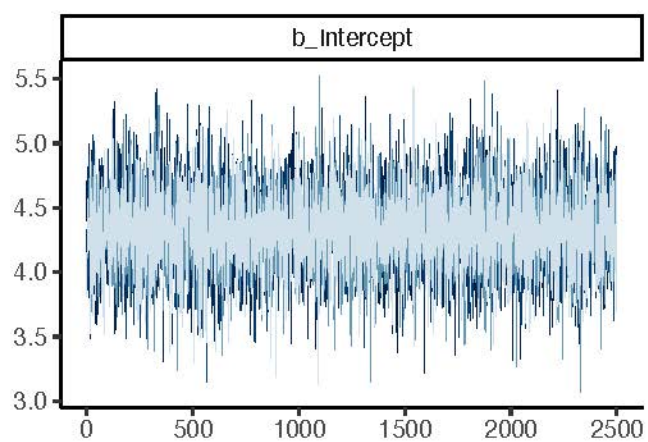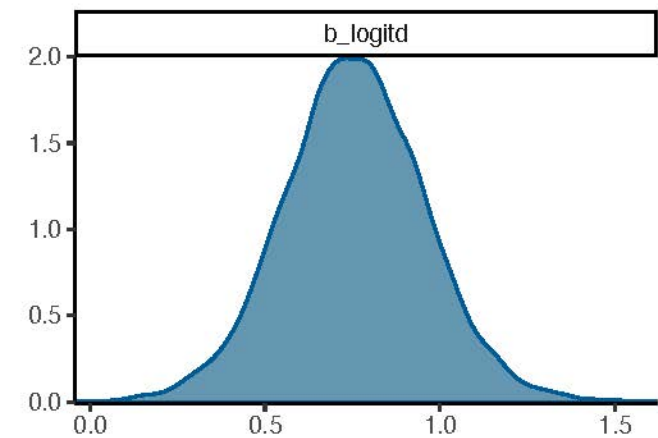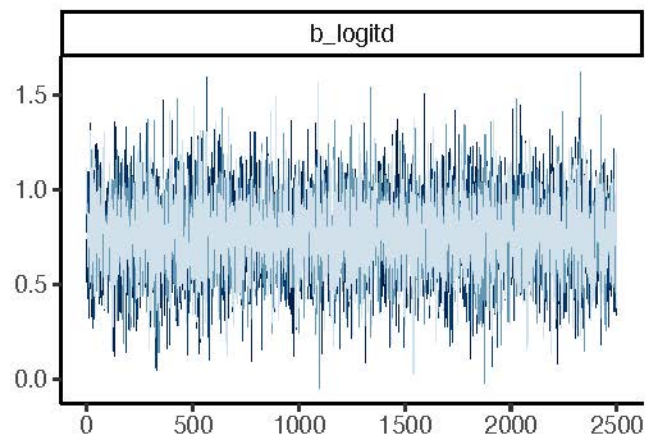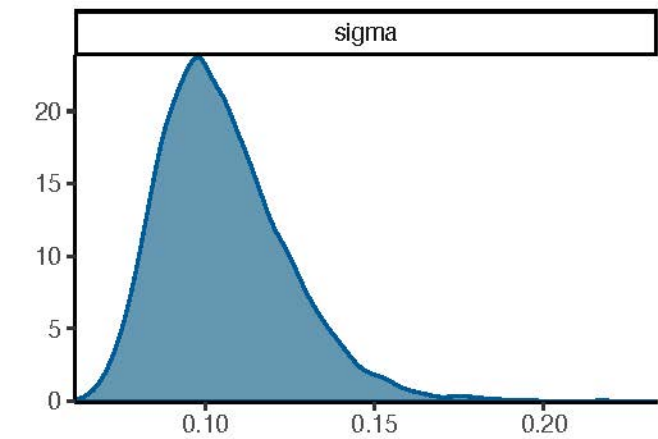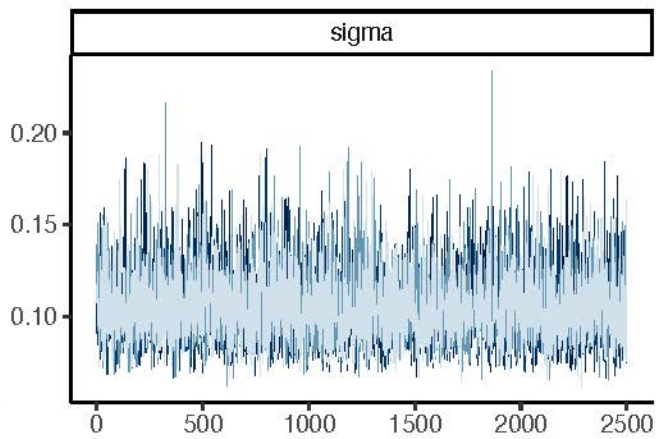

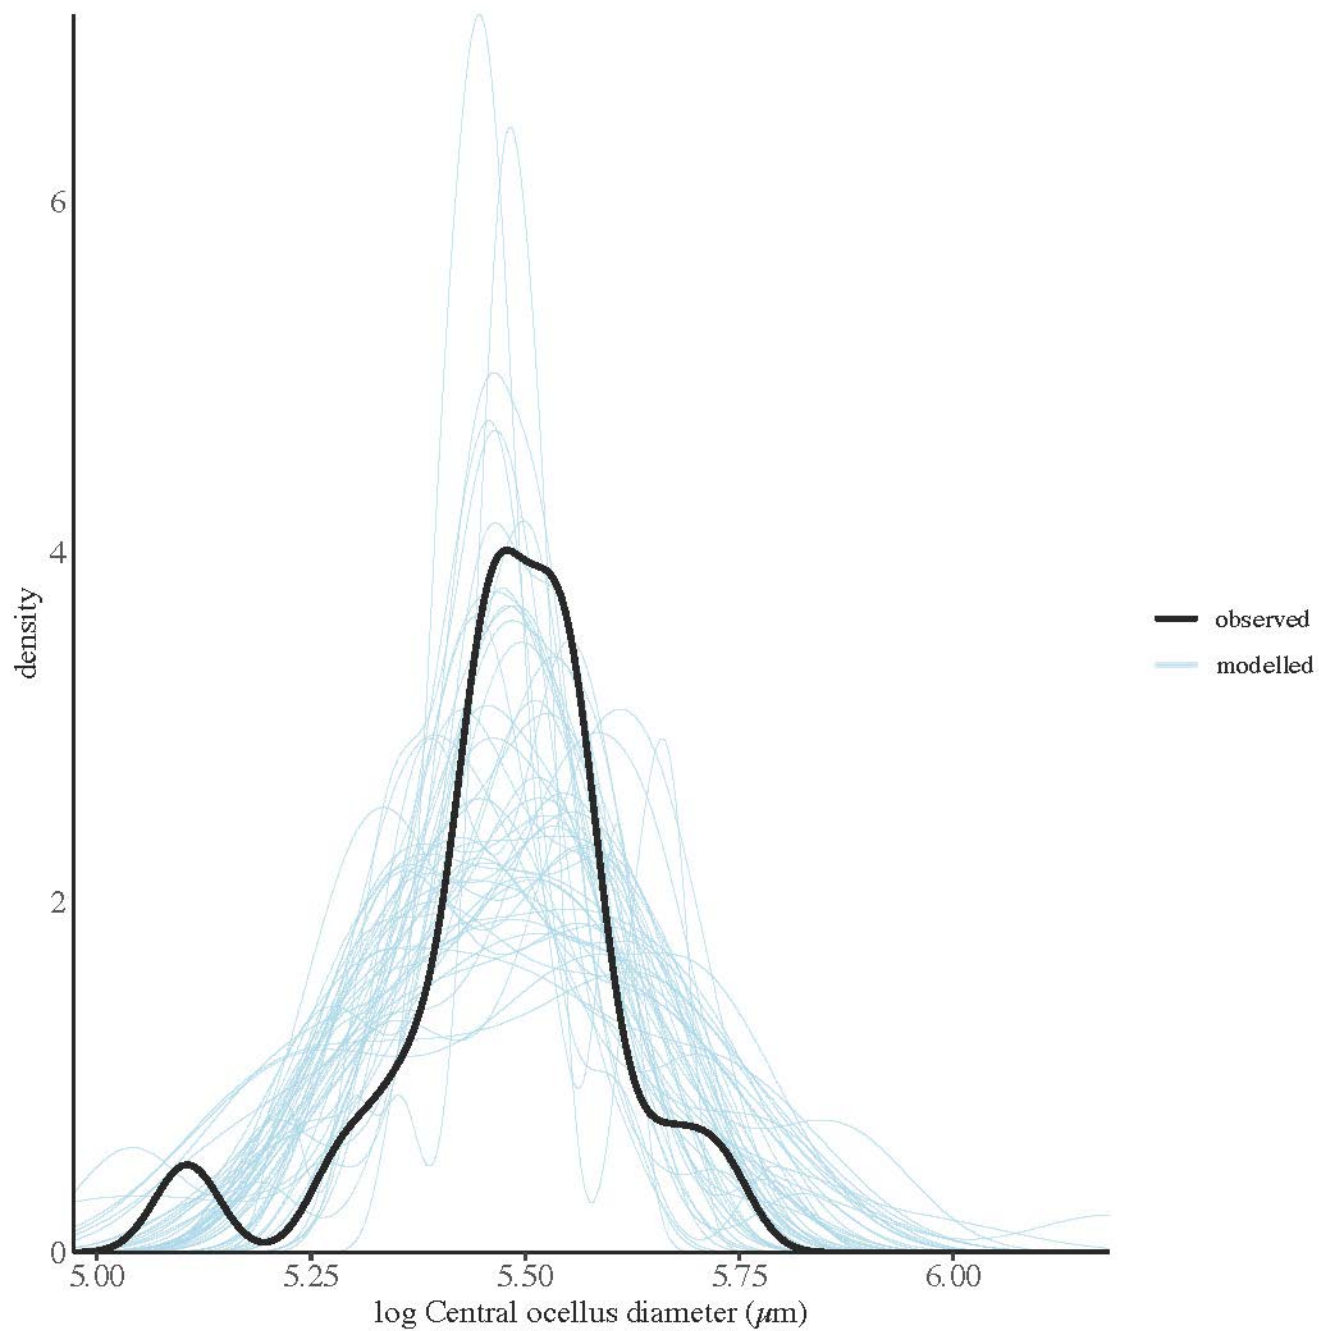

Lateral ocelli diameter ( $\mu\text{m}$ )

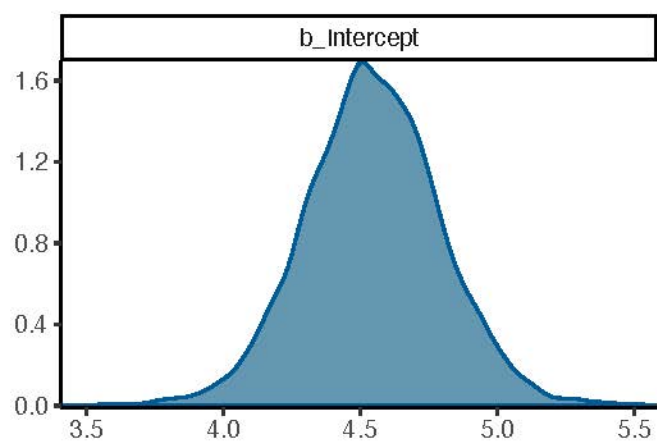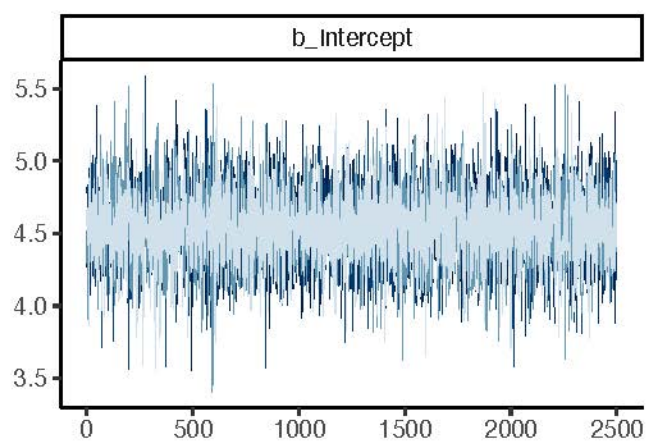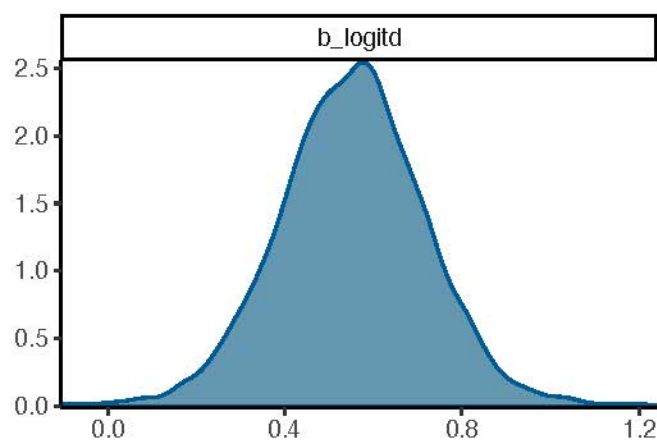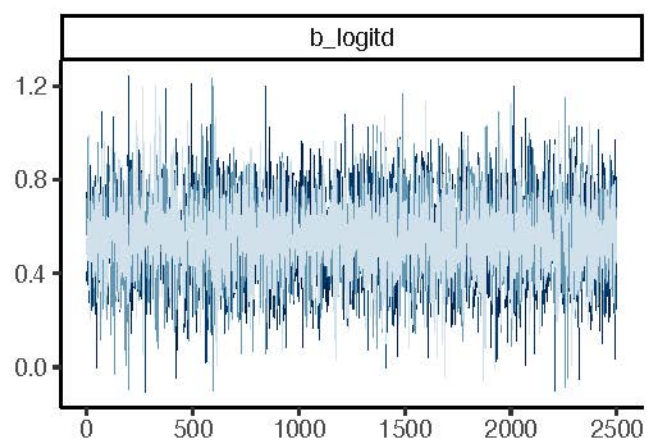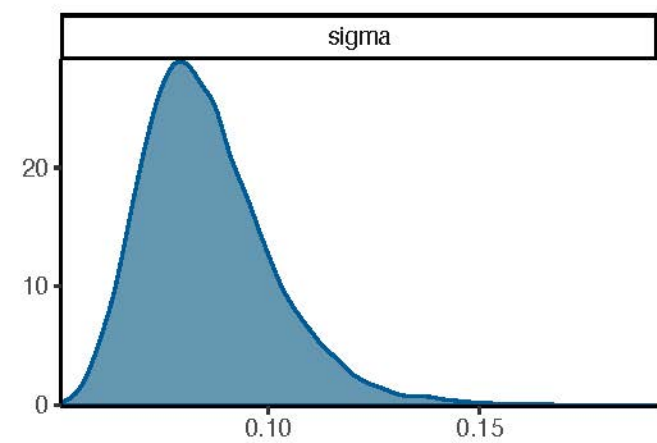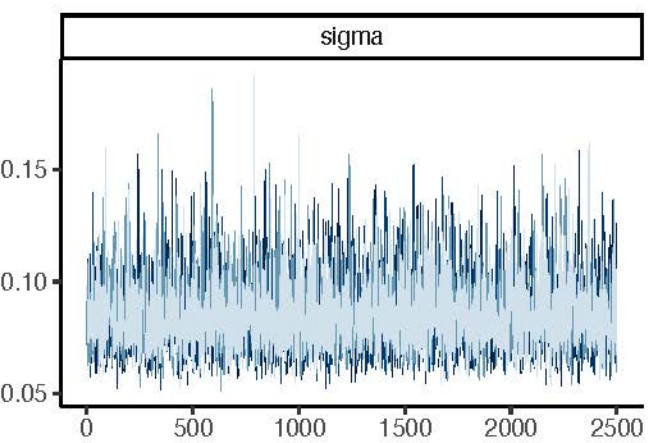

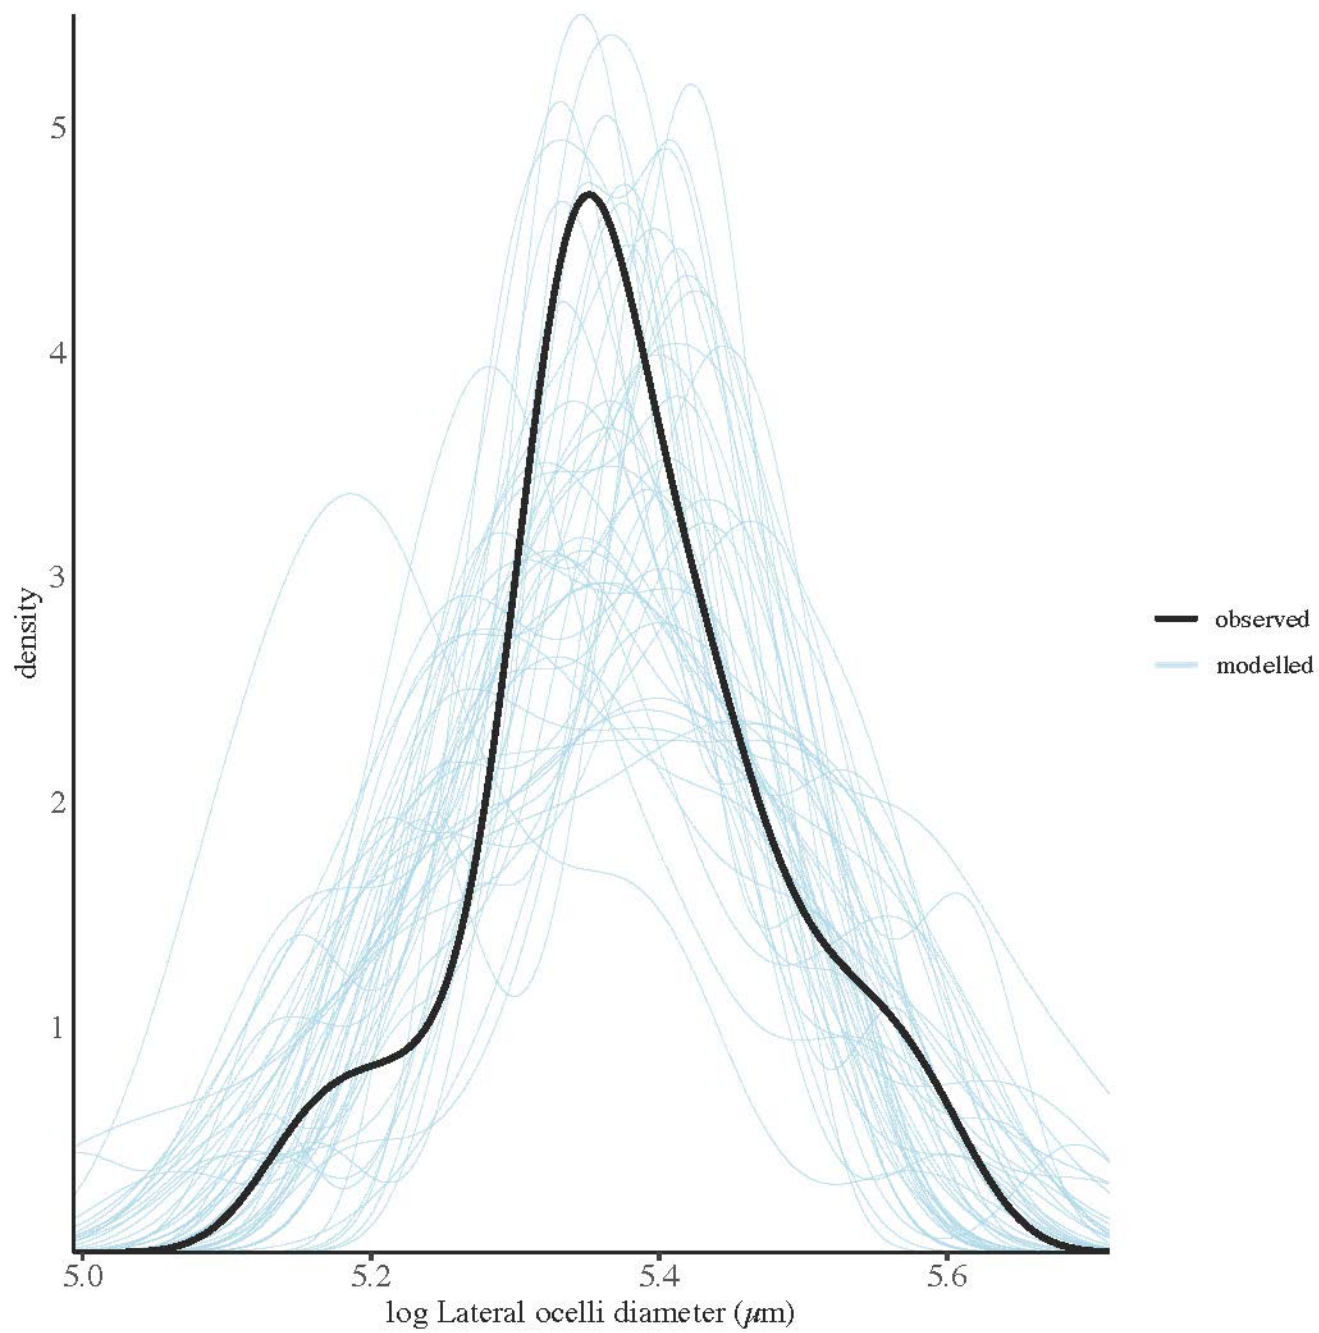

Ocellar alignment ( $^{\circ}$ )

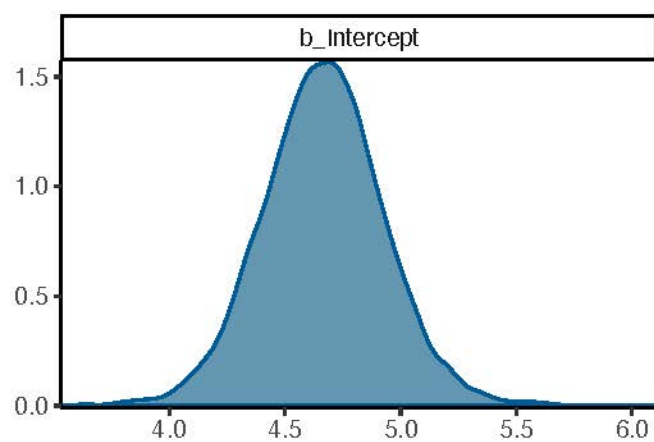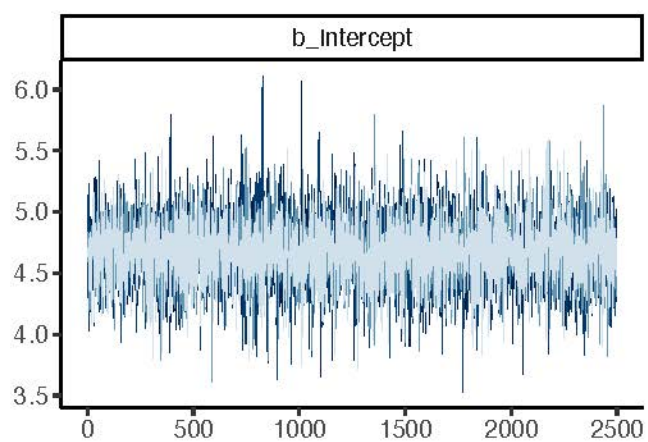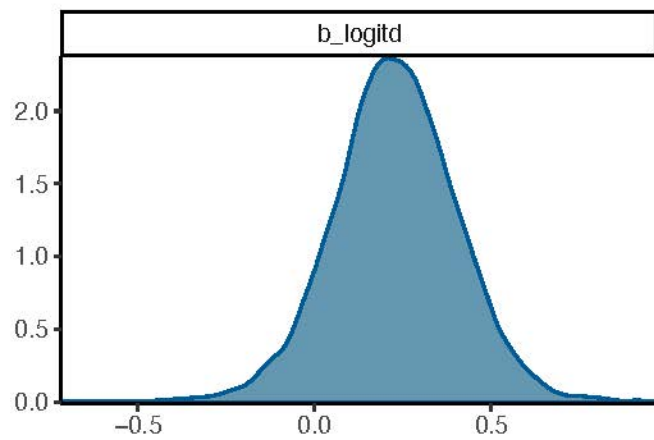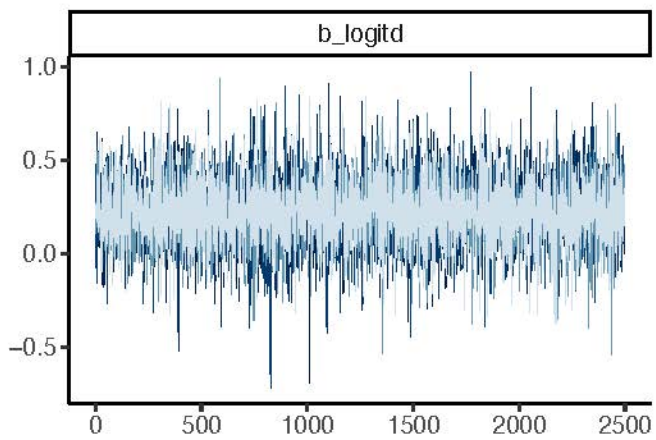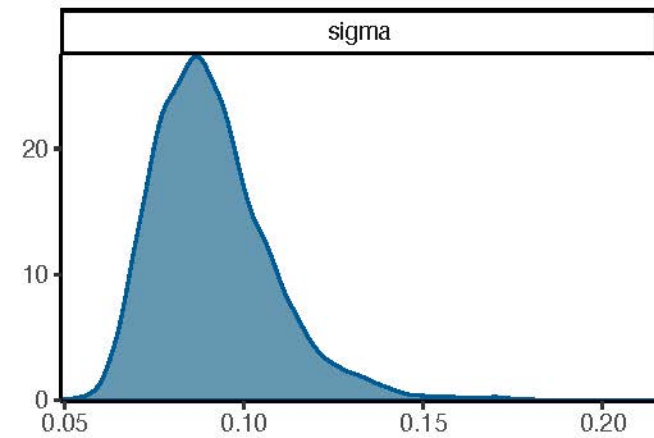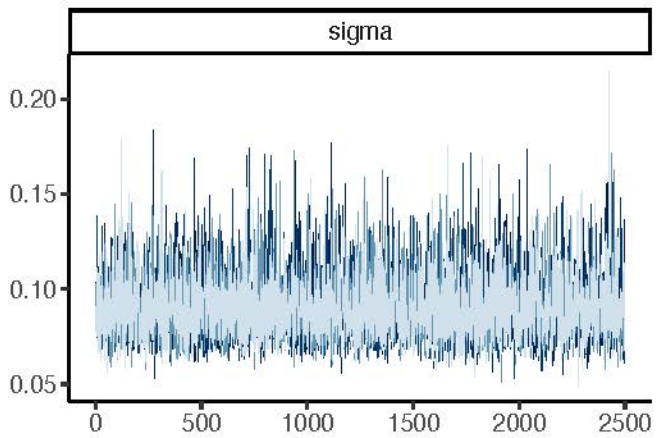



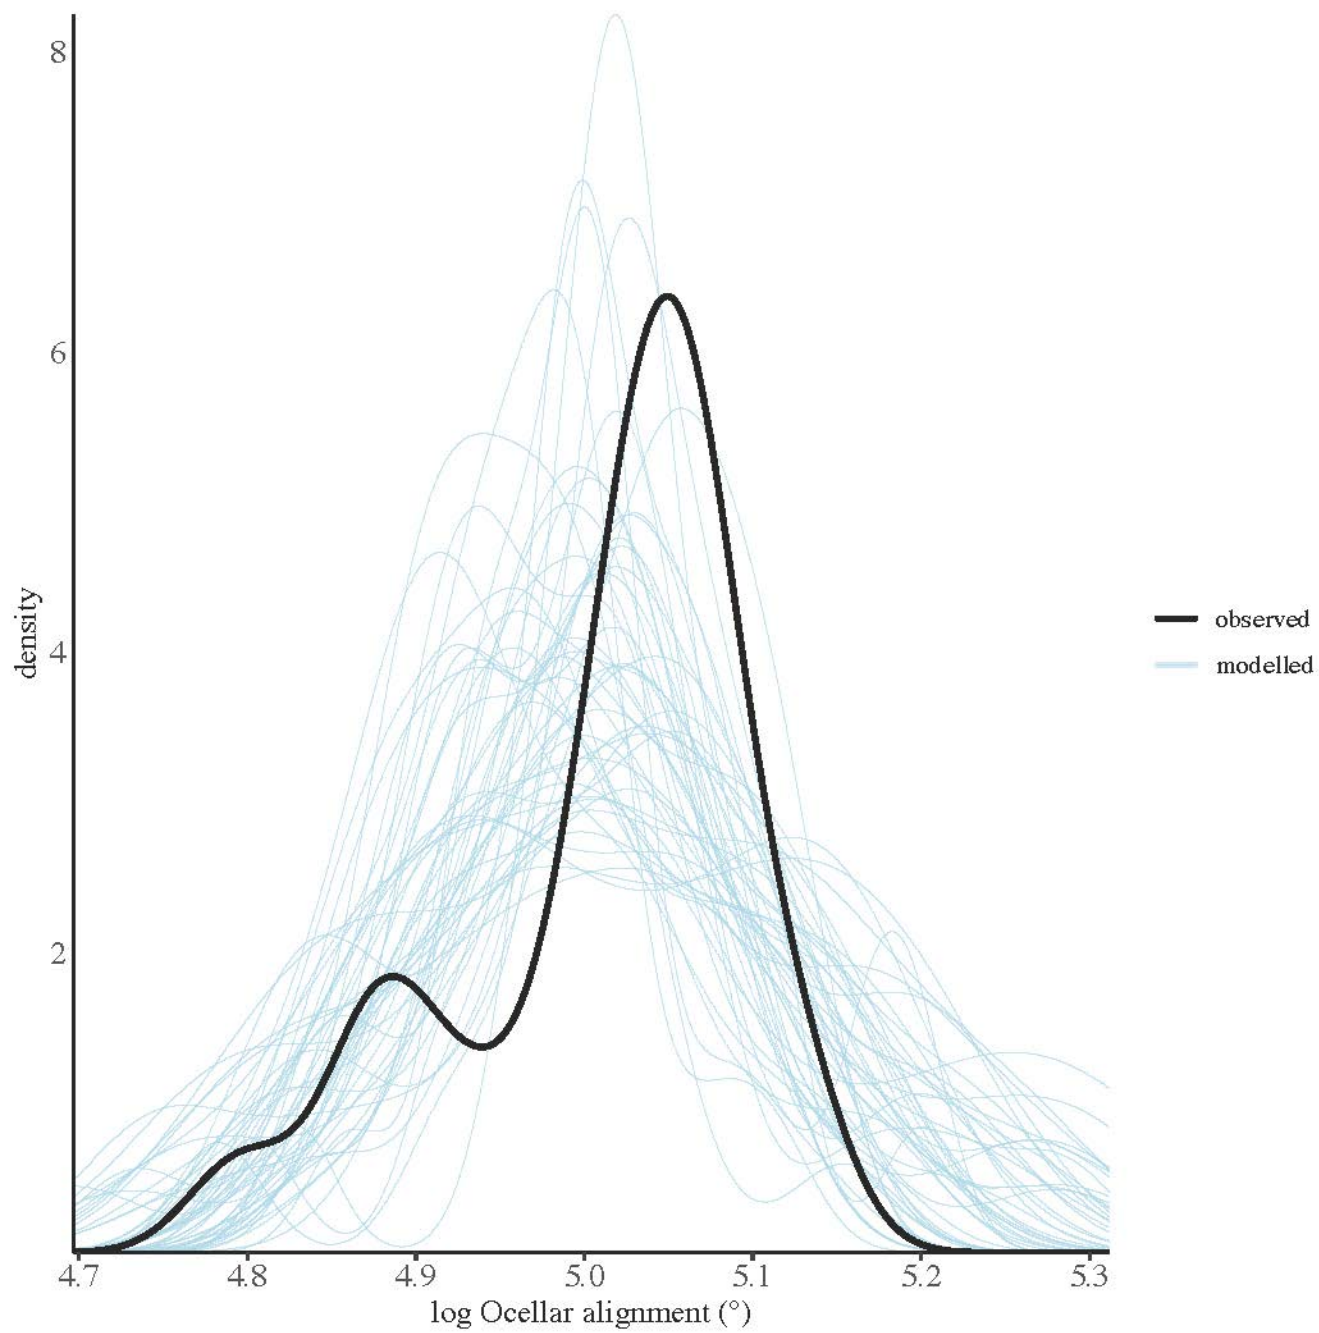



Monocular FOV (%)

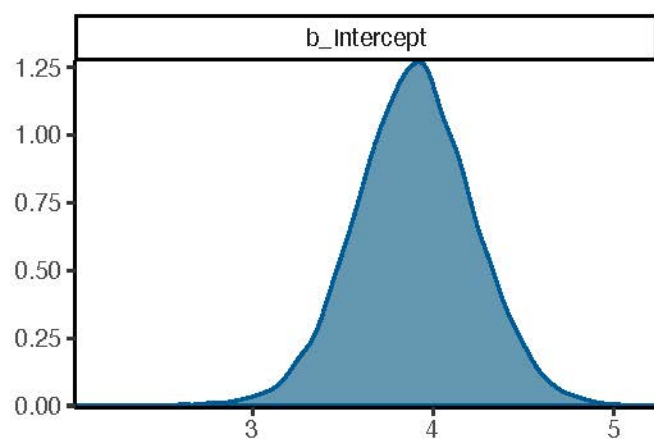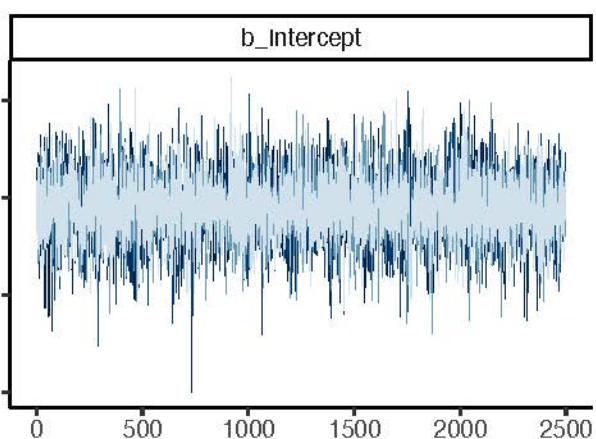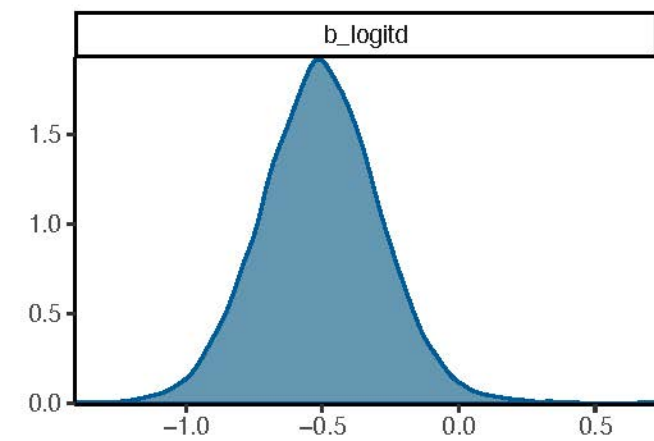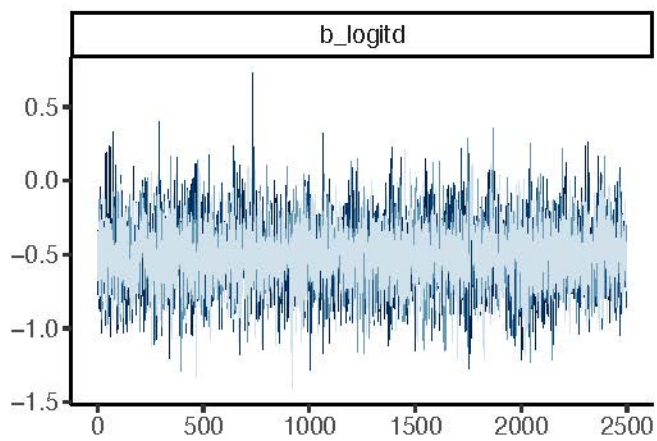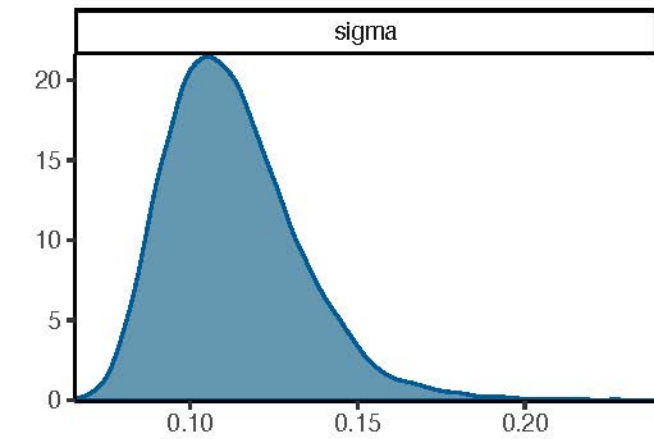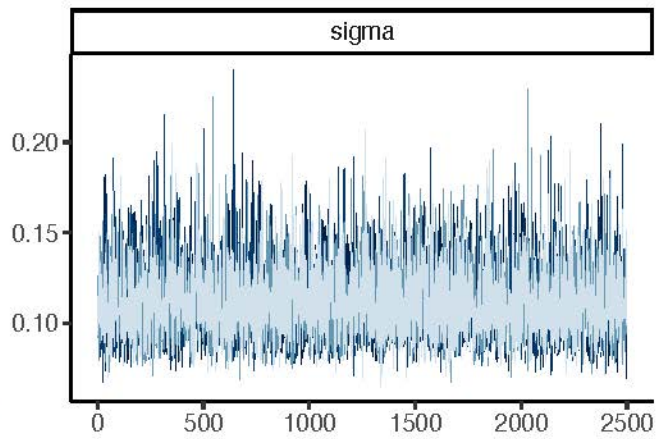

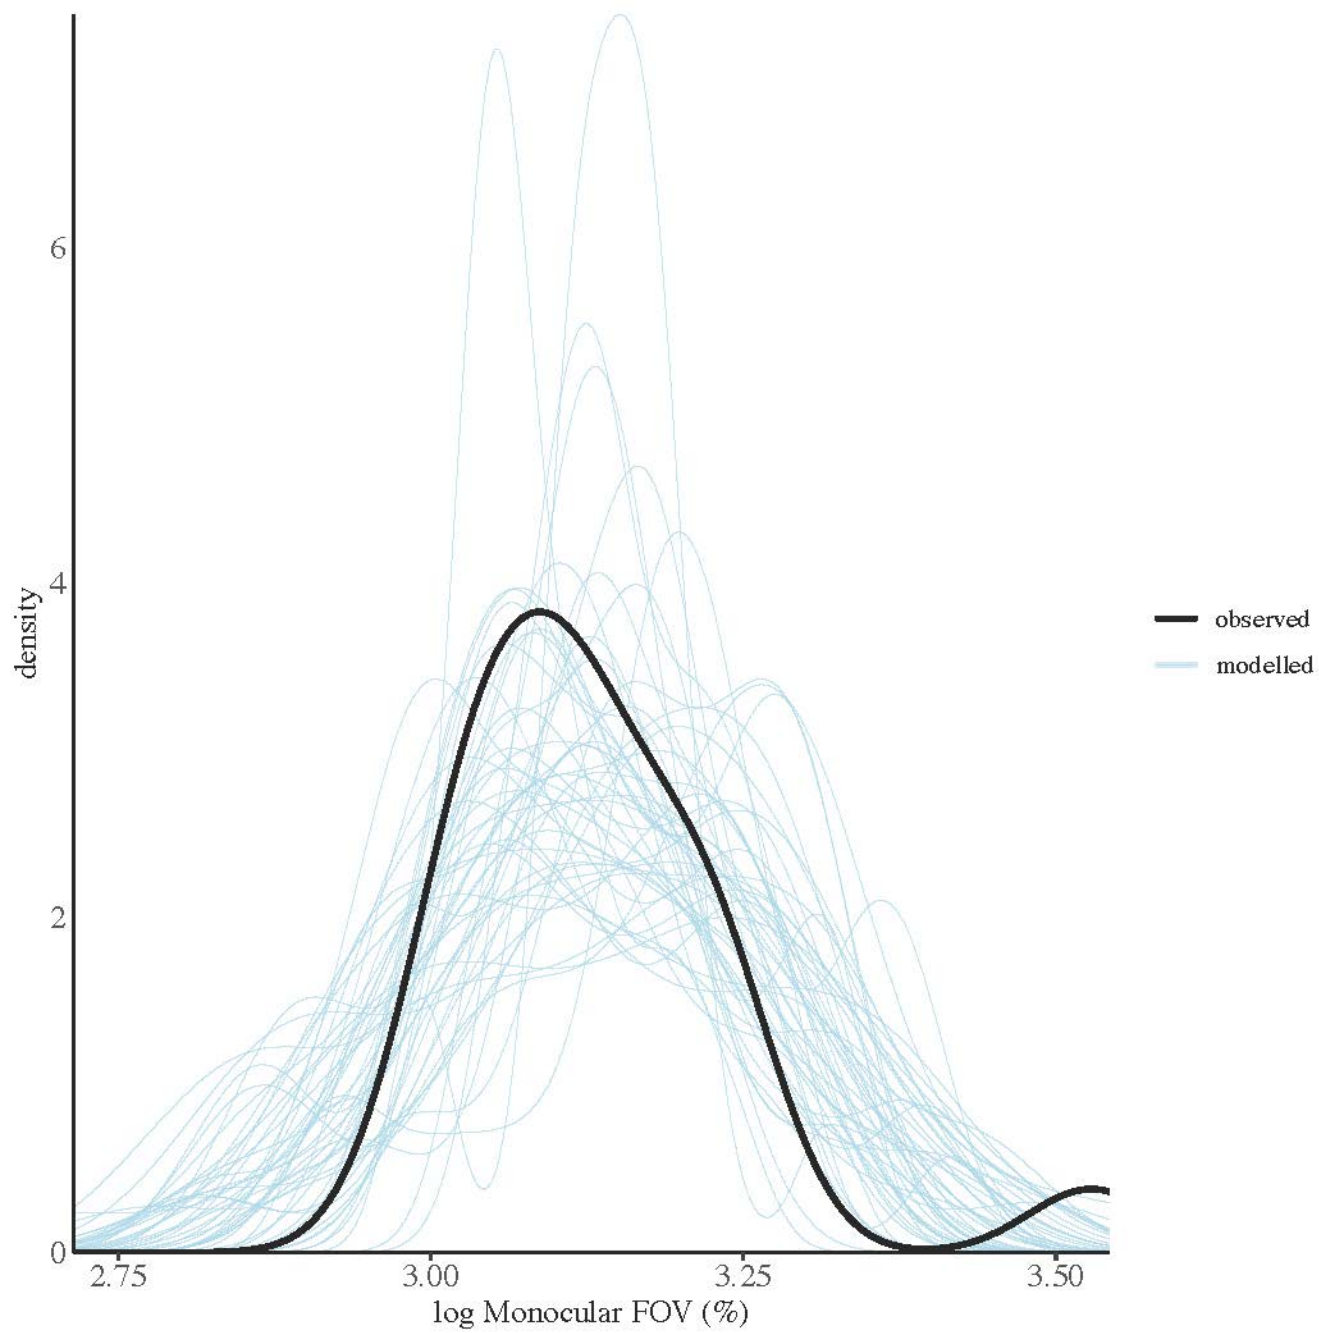

Binocular overlap (%)

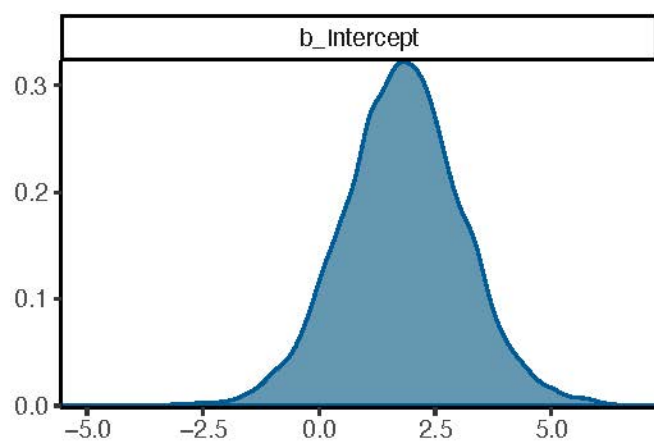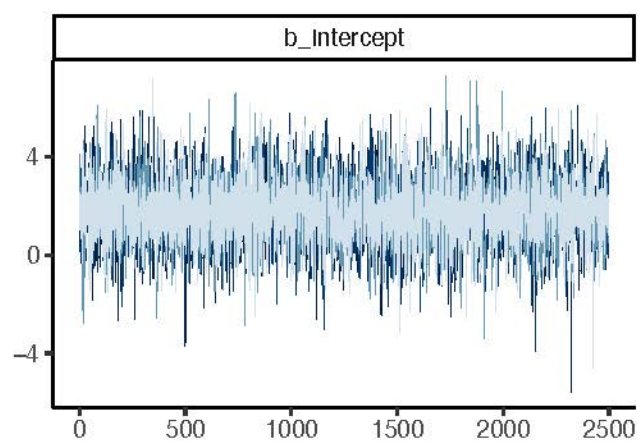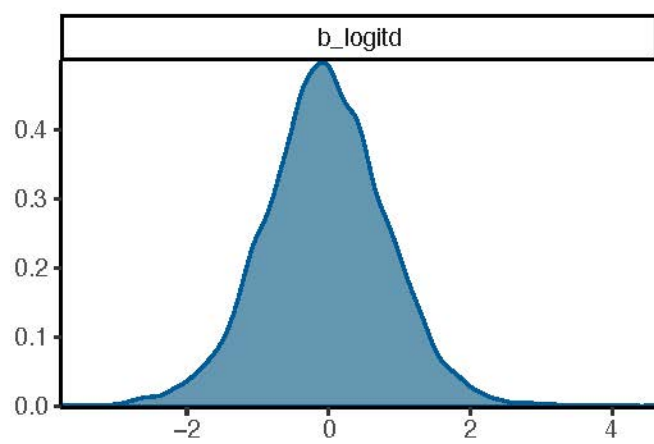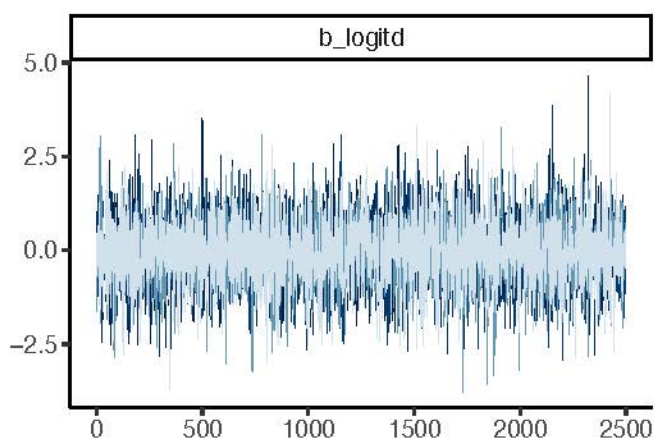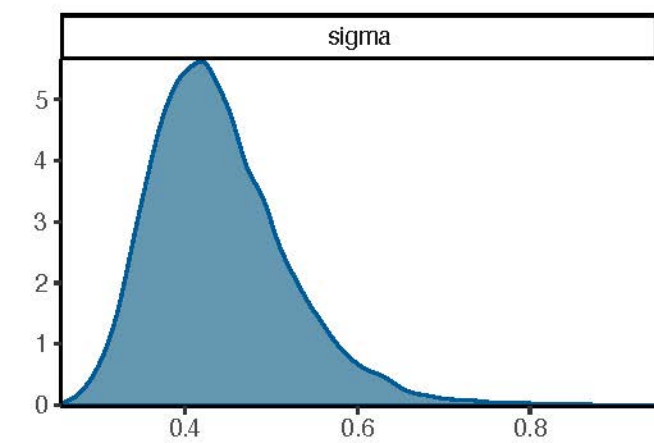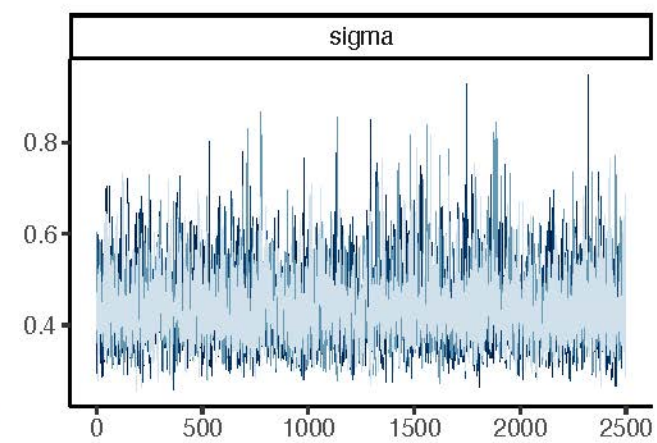

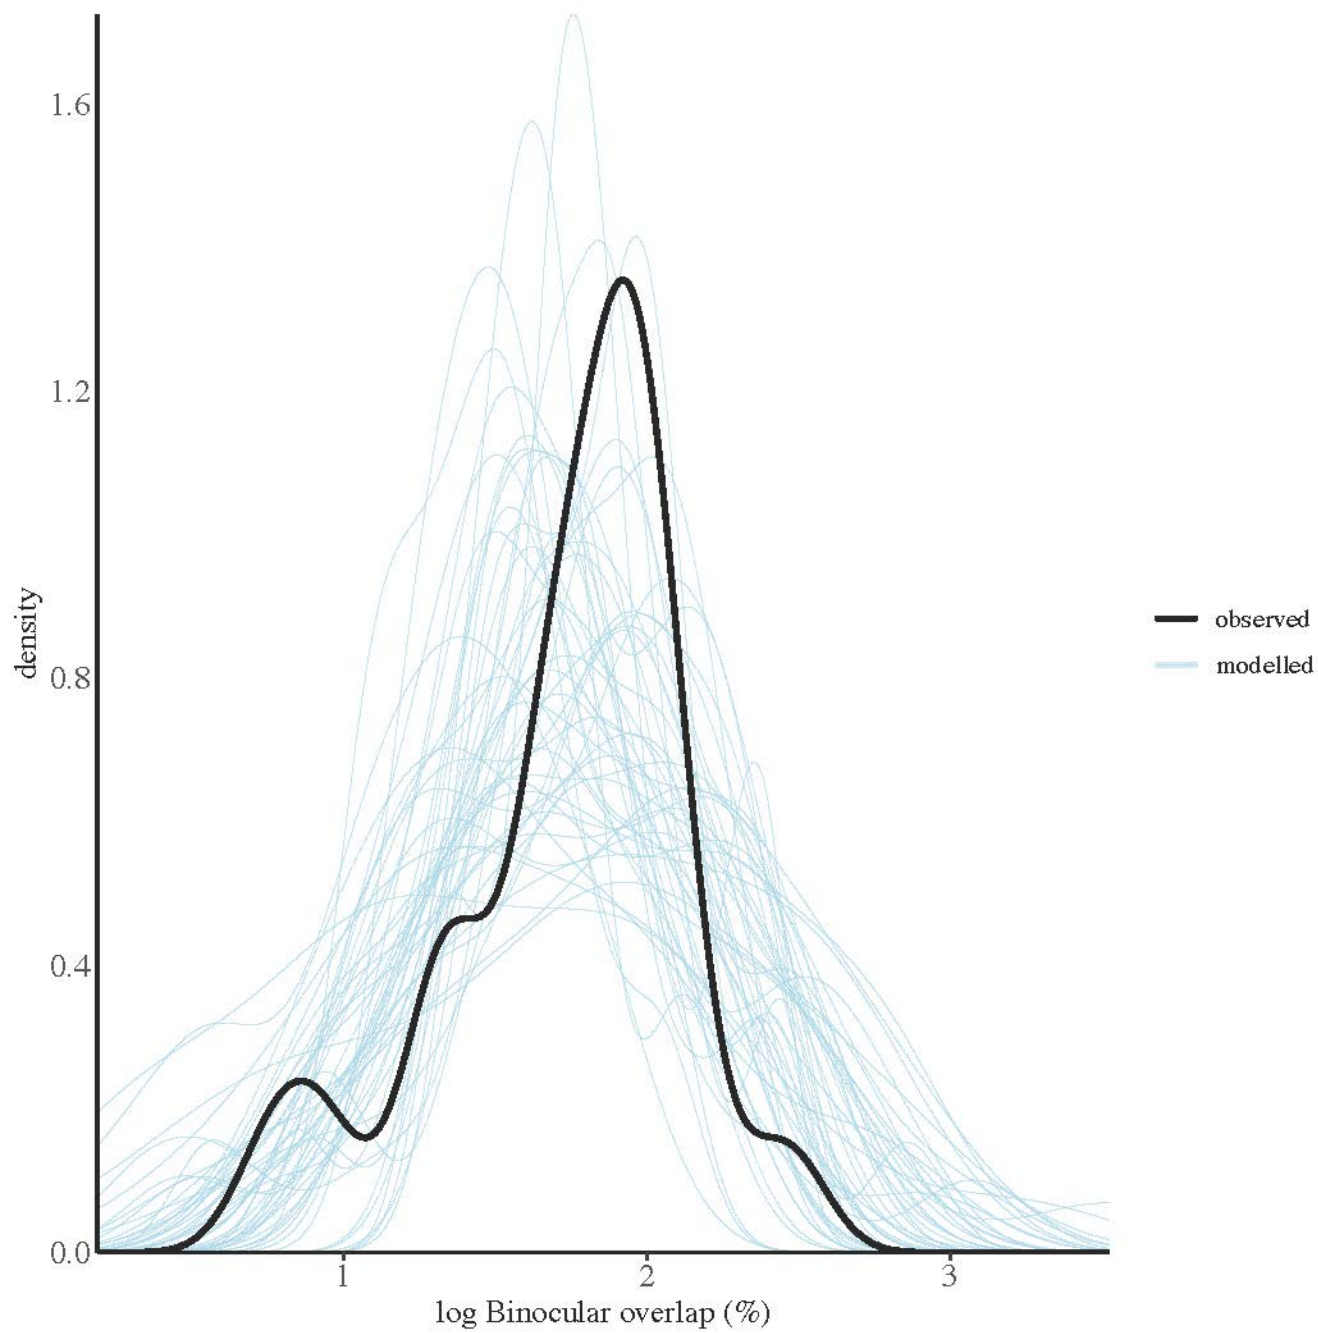

**Effects of tree cover on the community weighted means of visual traits and ITD in bumblebee communities within grasslands across Sweden.** Model traces and posterior predictive check for each visual trait modelled with Bayesian inference.

Eye surface ( $\mu\text{m}^2$ )



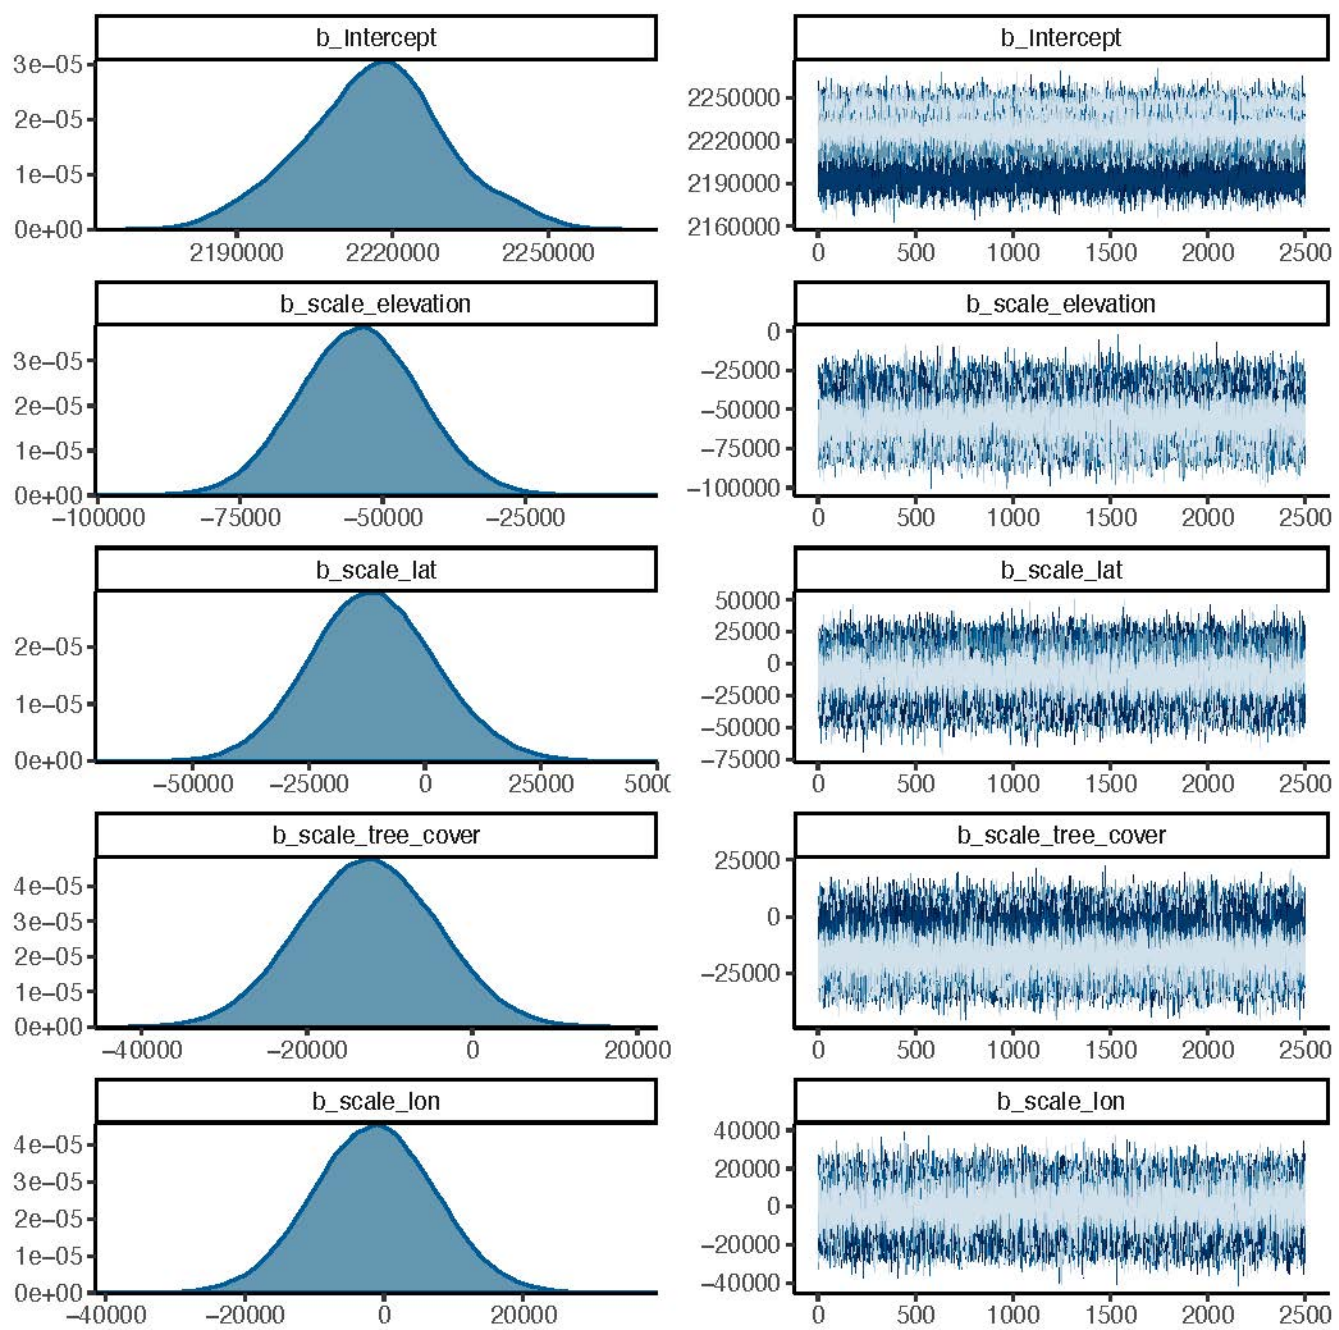

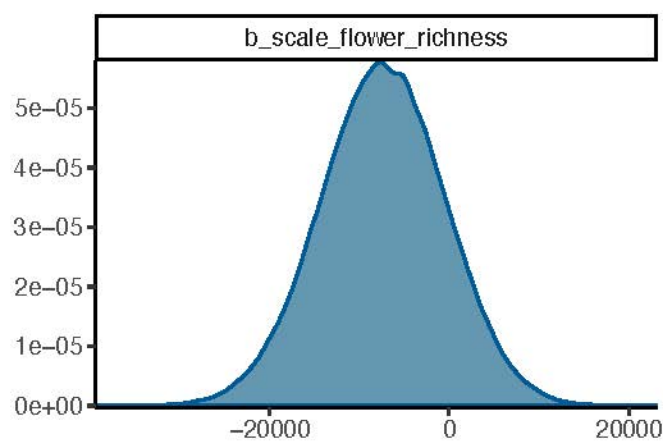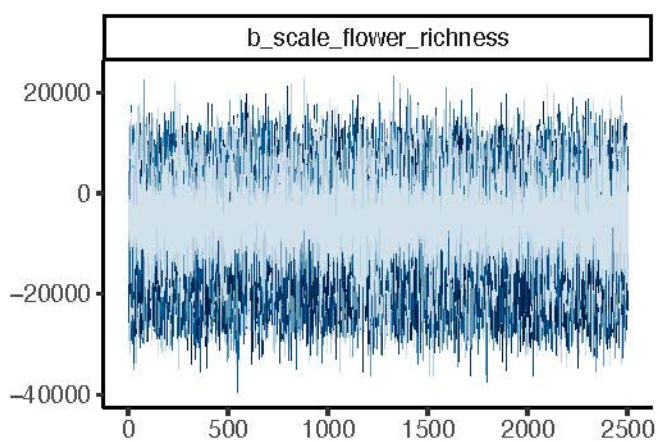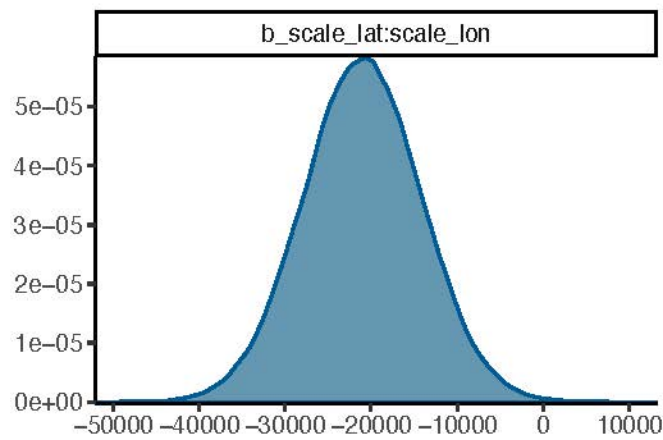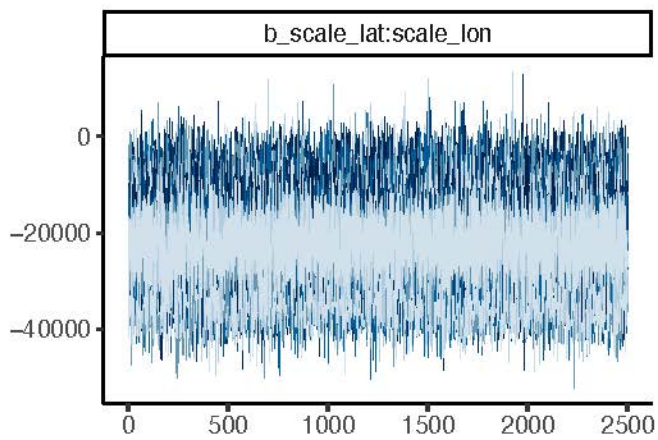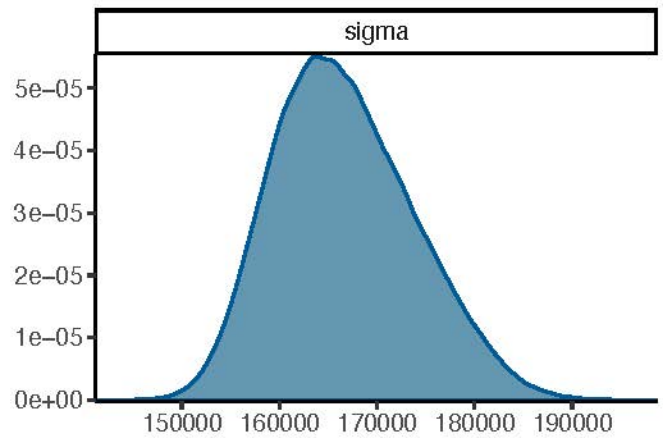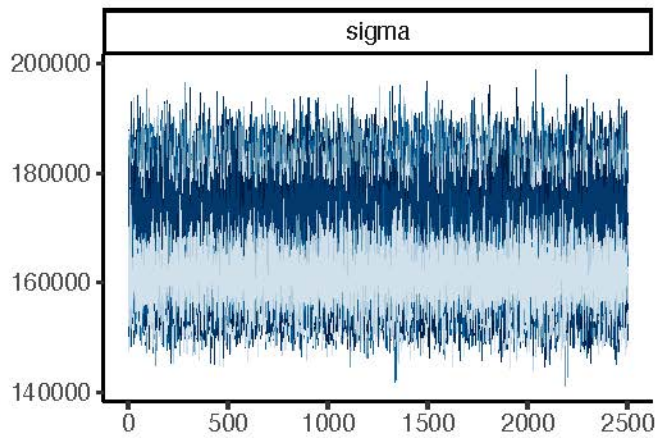

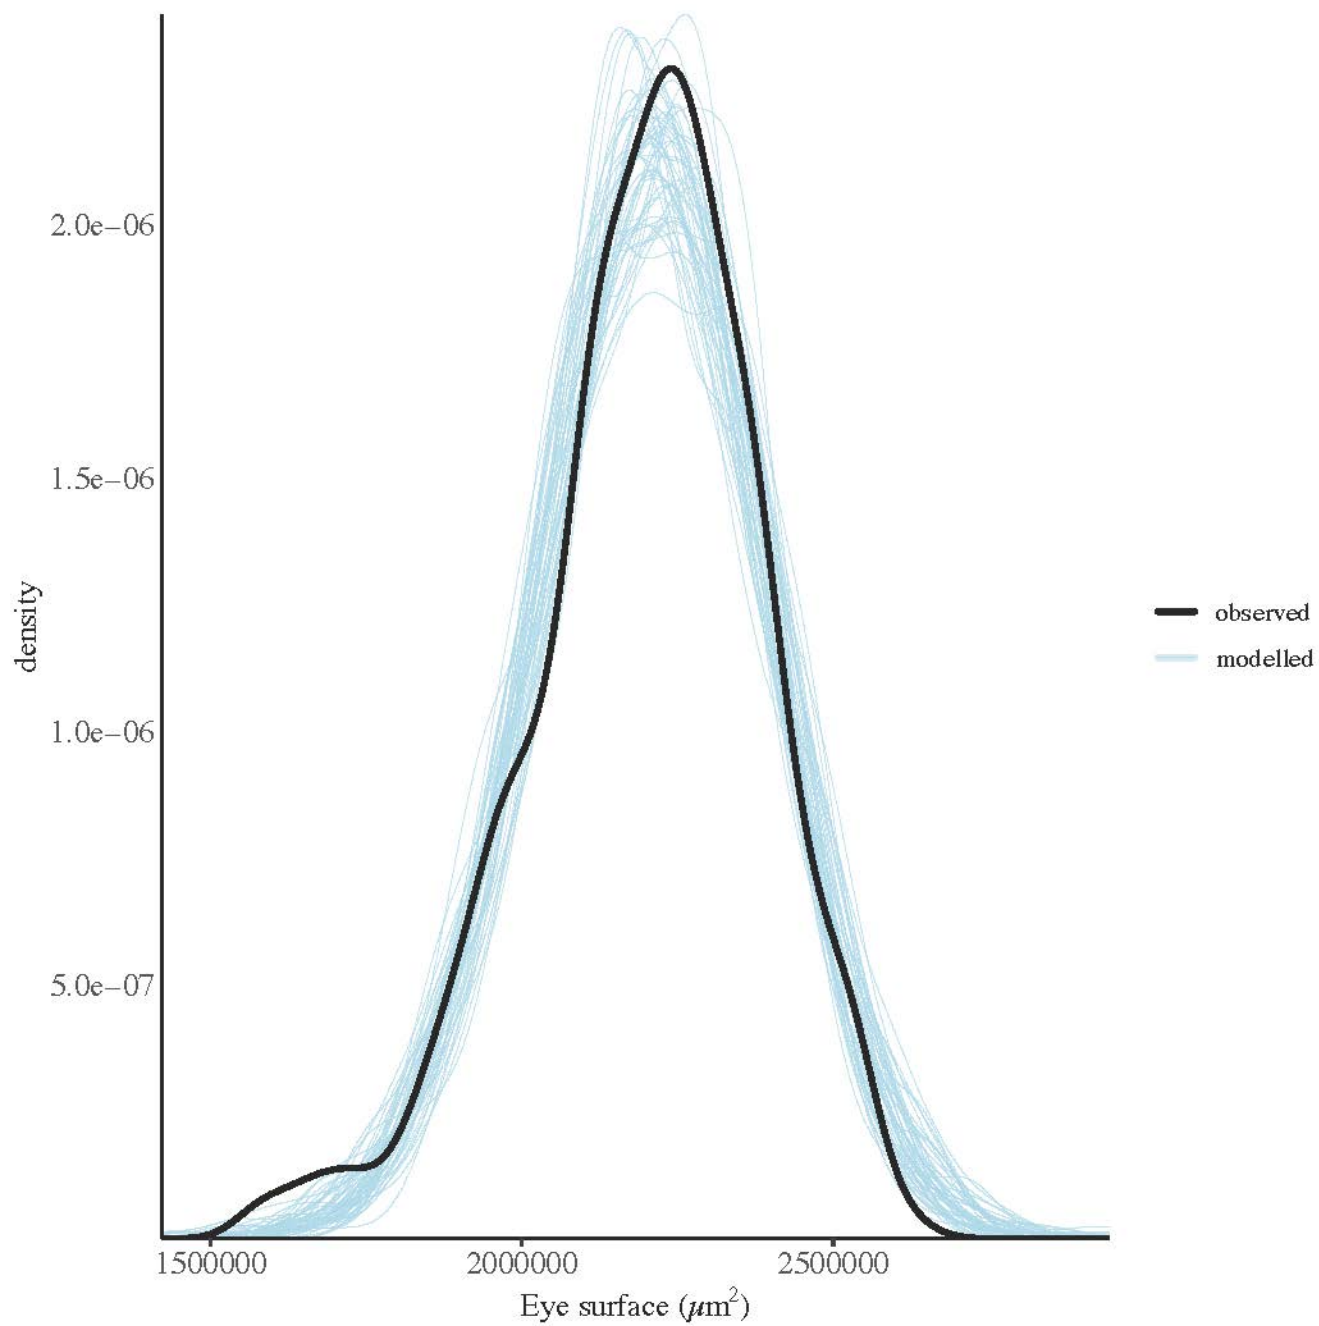

Facet diameter ( $\mu\text{m}$ )

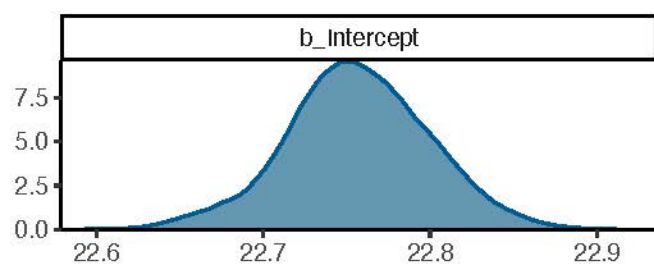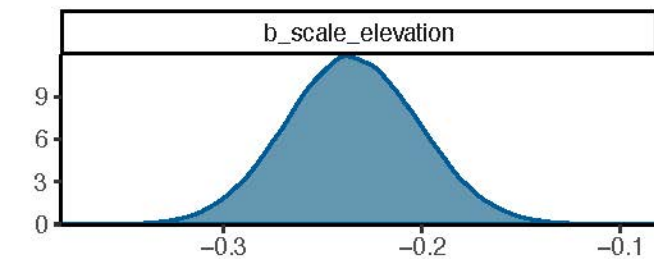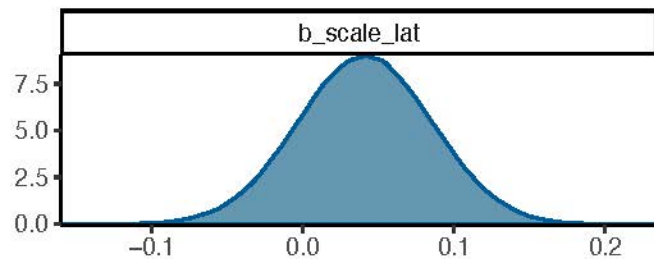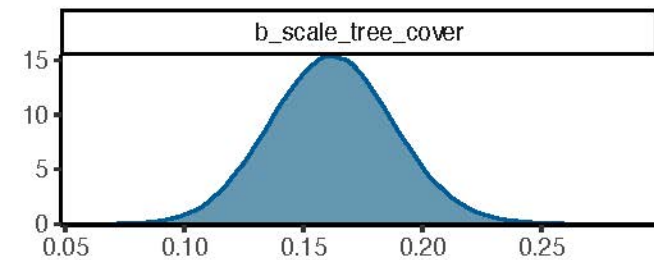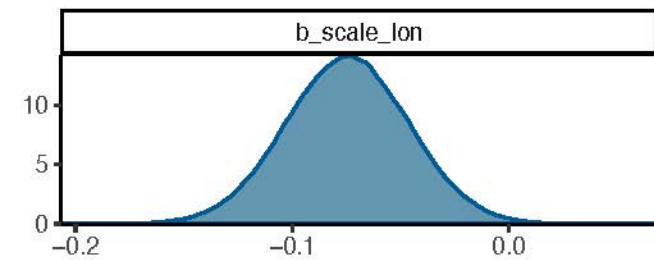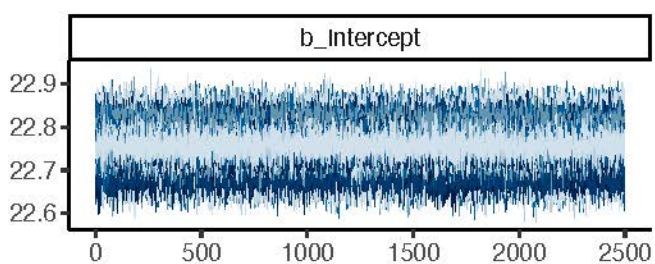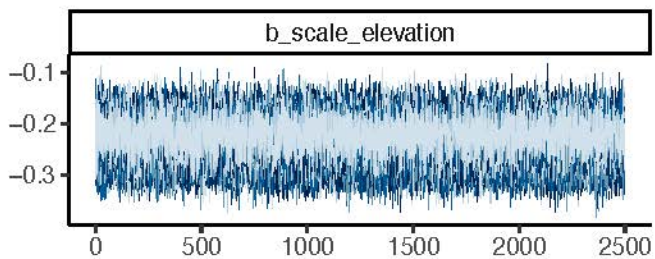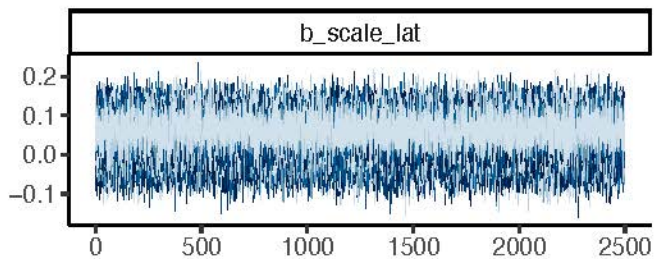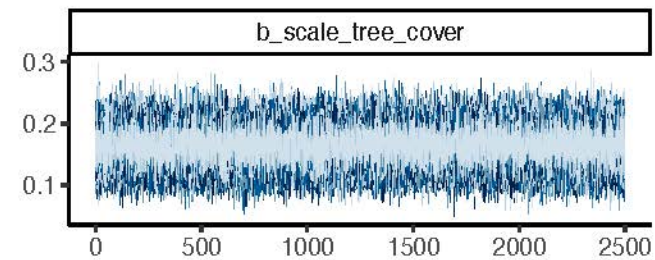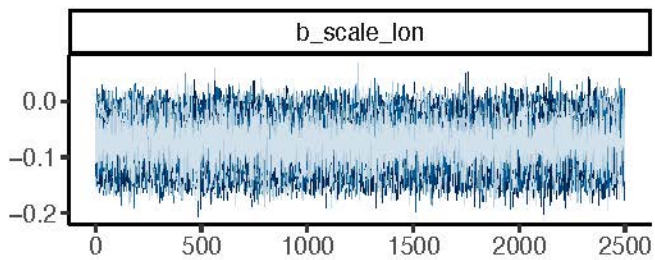



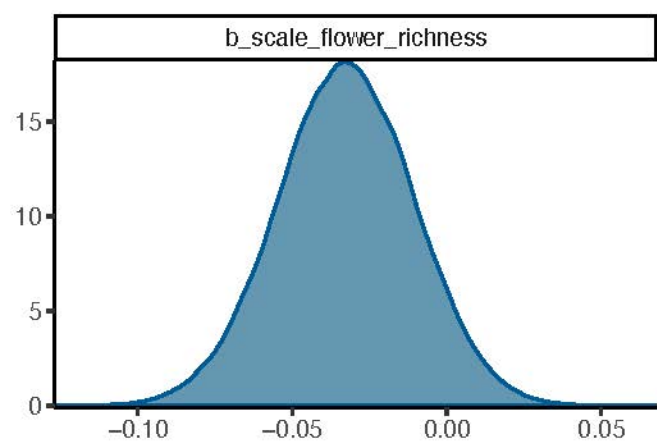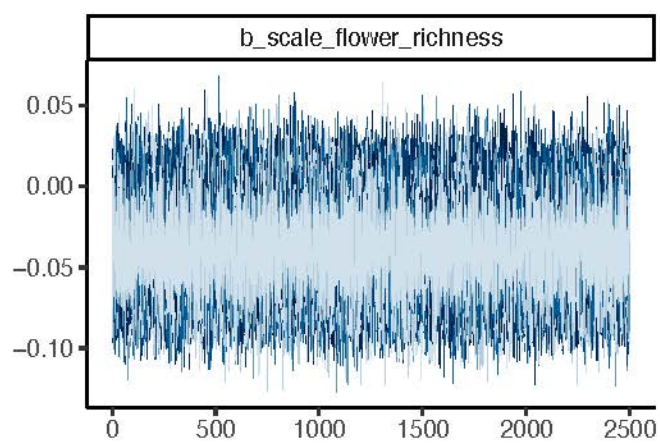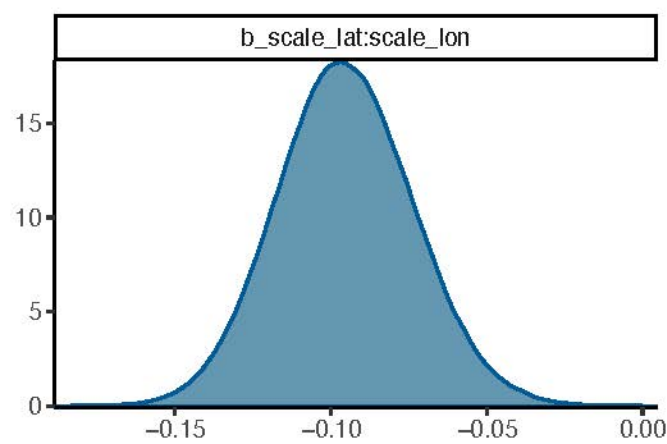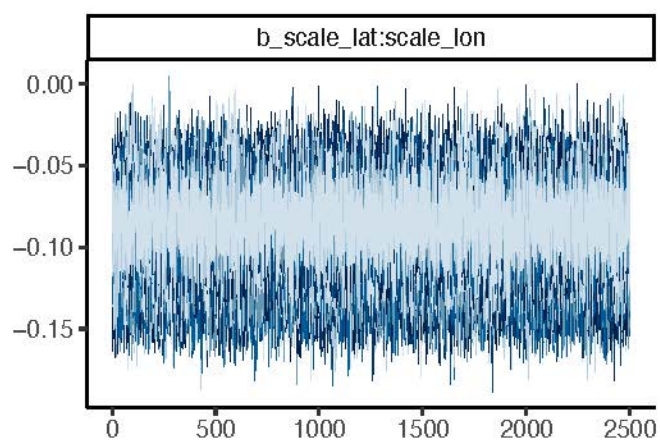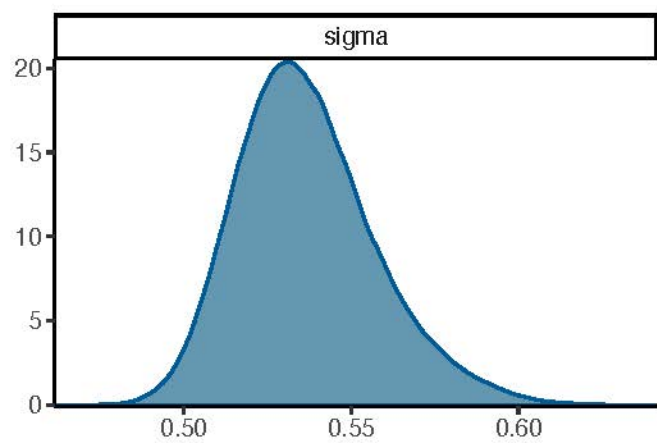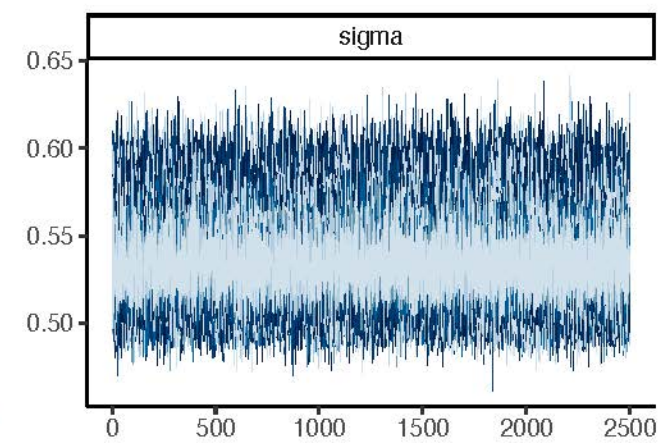

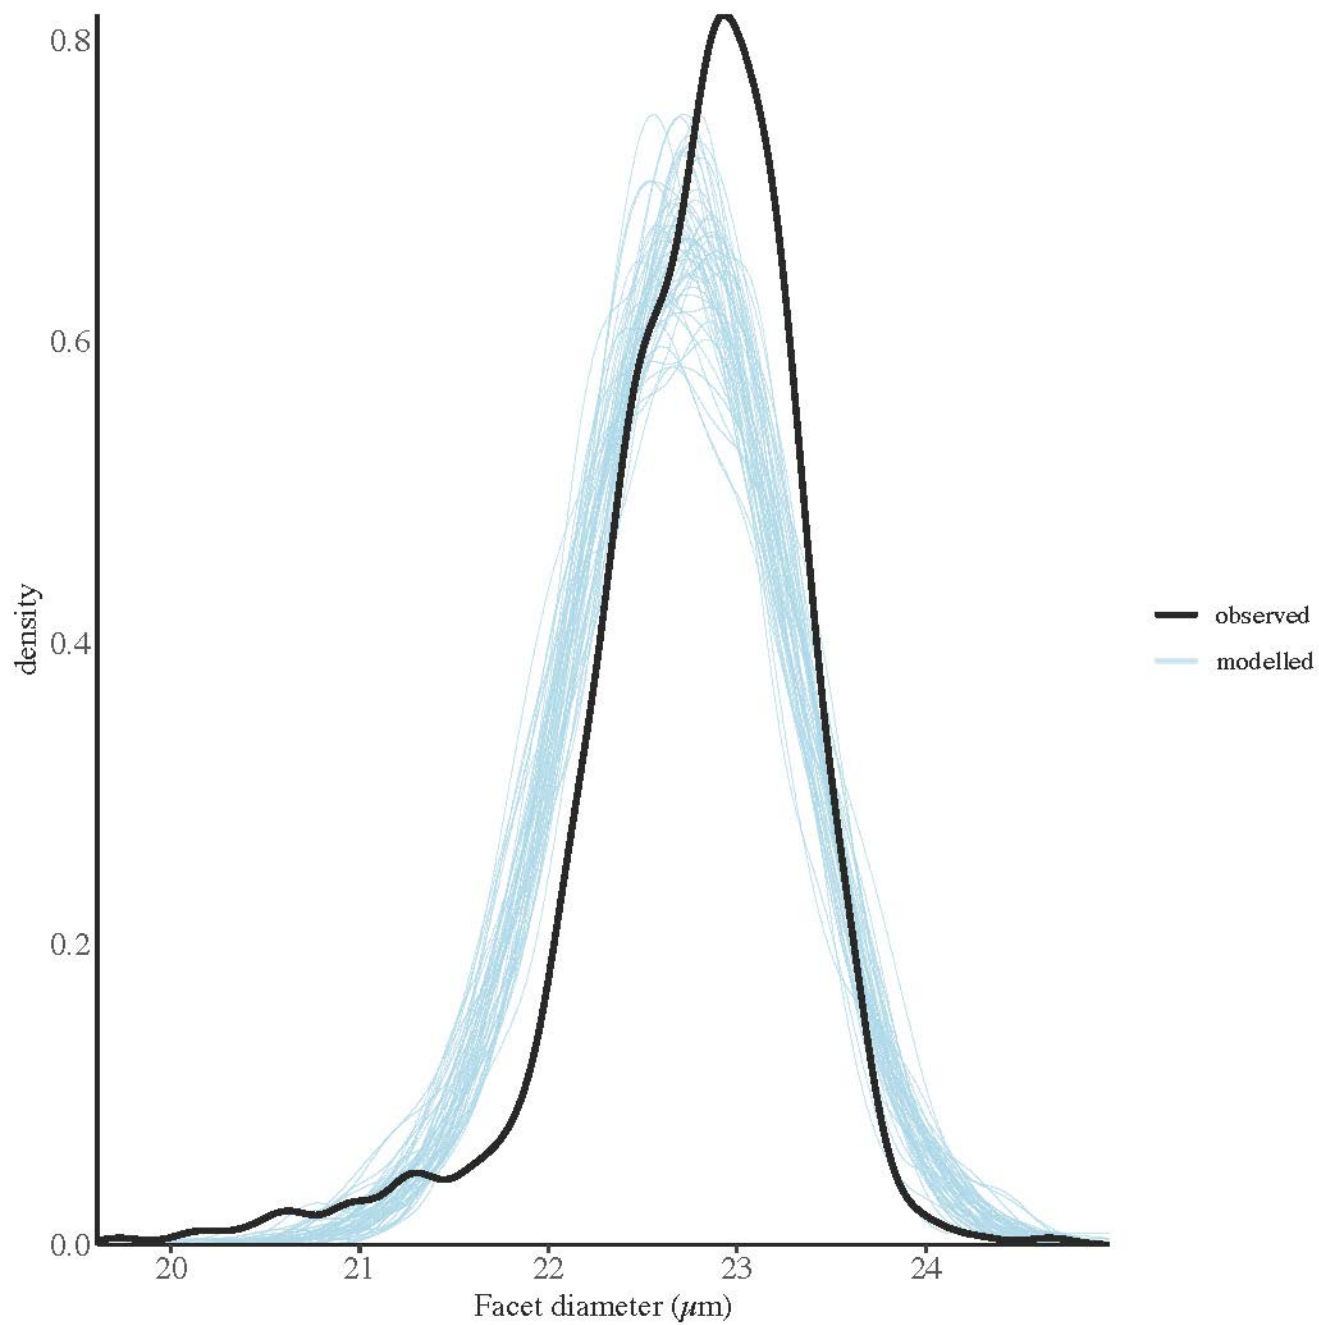

Inter-ommatidial angle ( $^{\circ}$ )



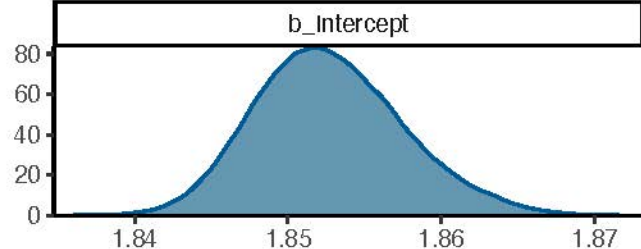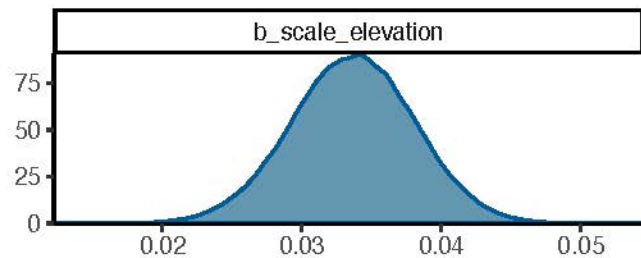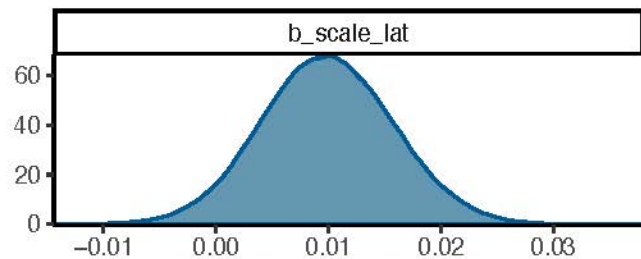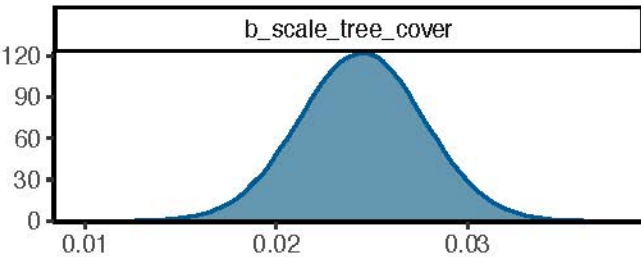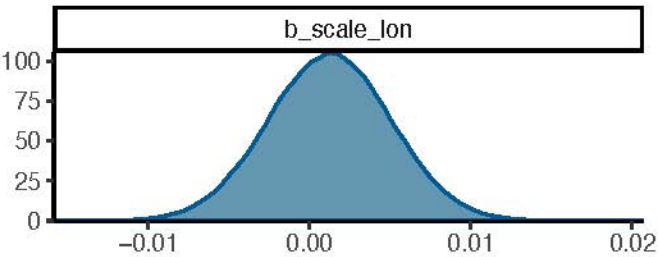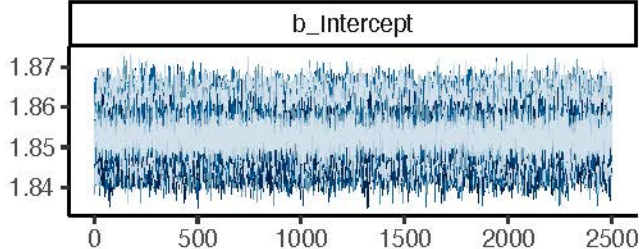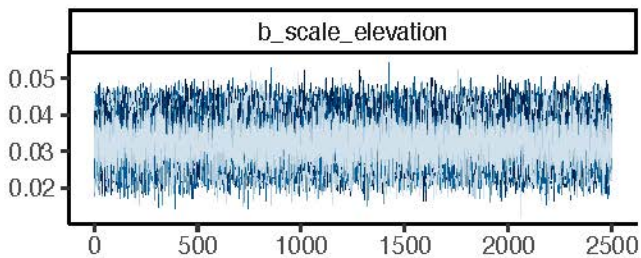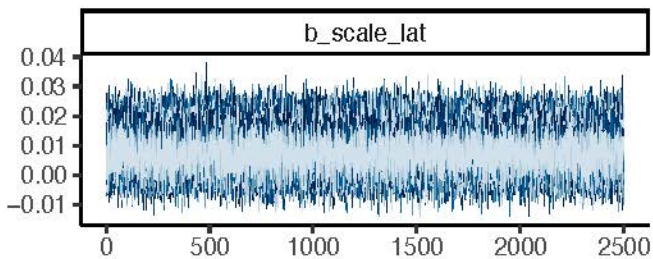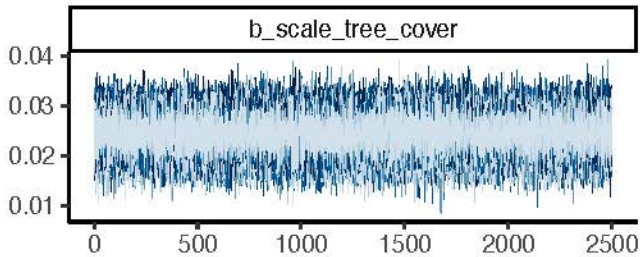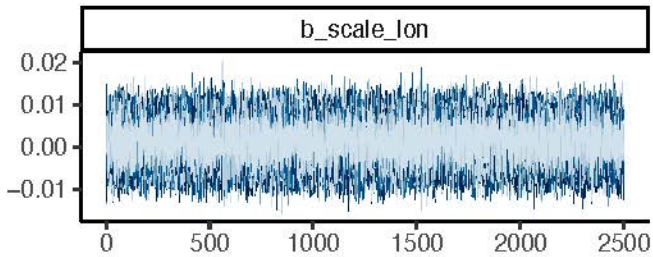

b\_scale\_flower\_richness

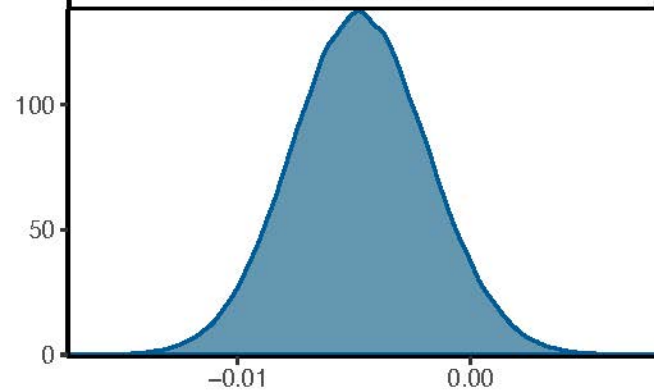

b\_scale\_flower\_richness

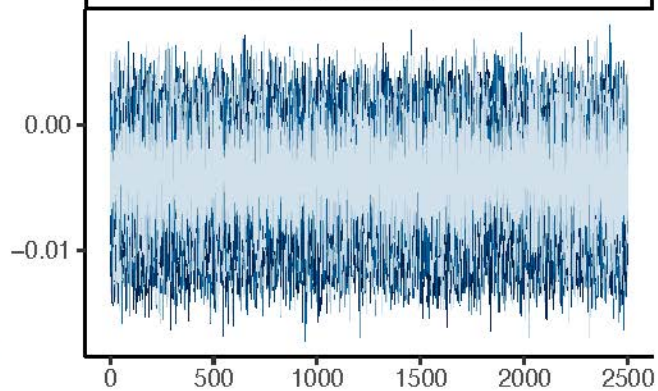

b\_scale\_lat:scale\_lon

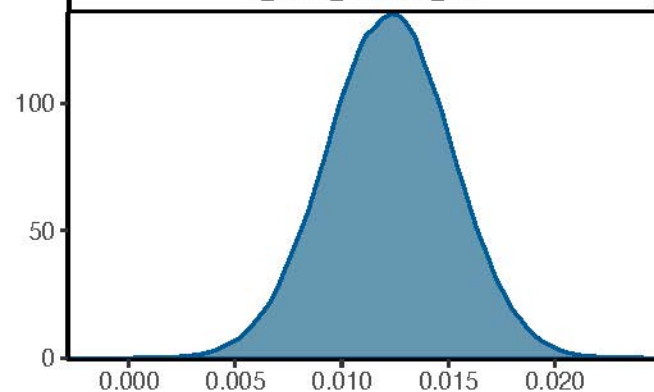

b\_scale\_lat:scale\_lon

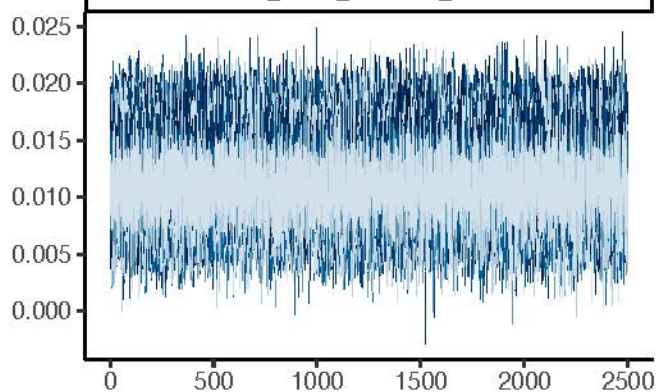

sigma

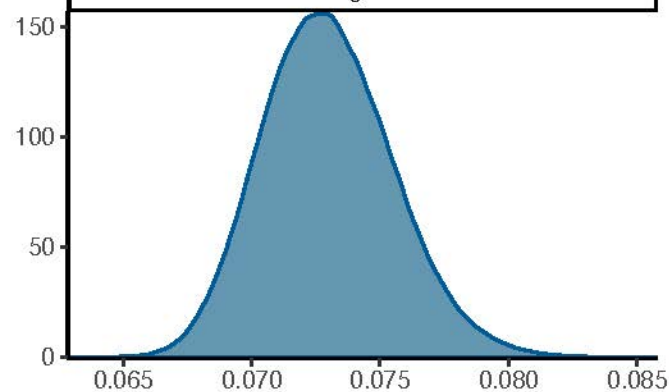

sigma

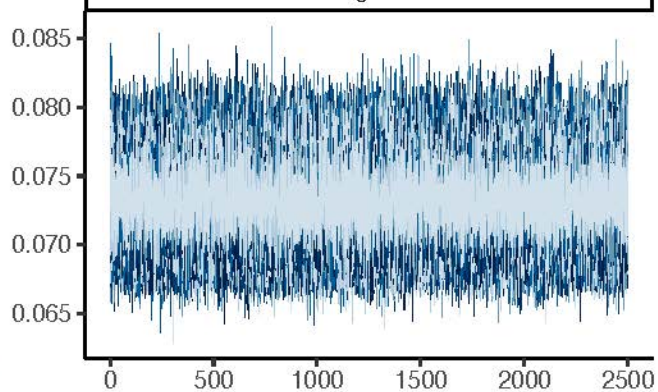

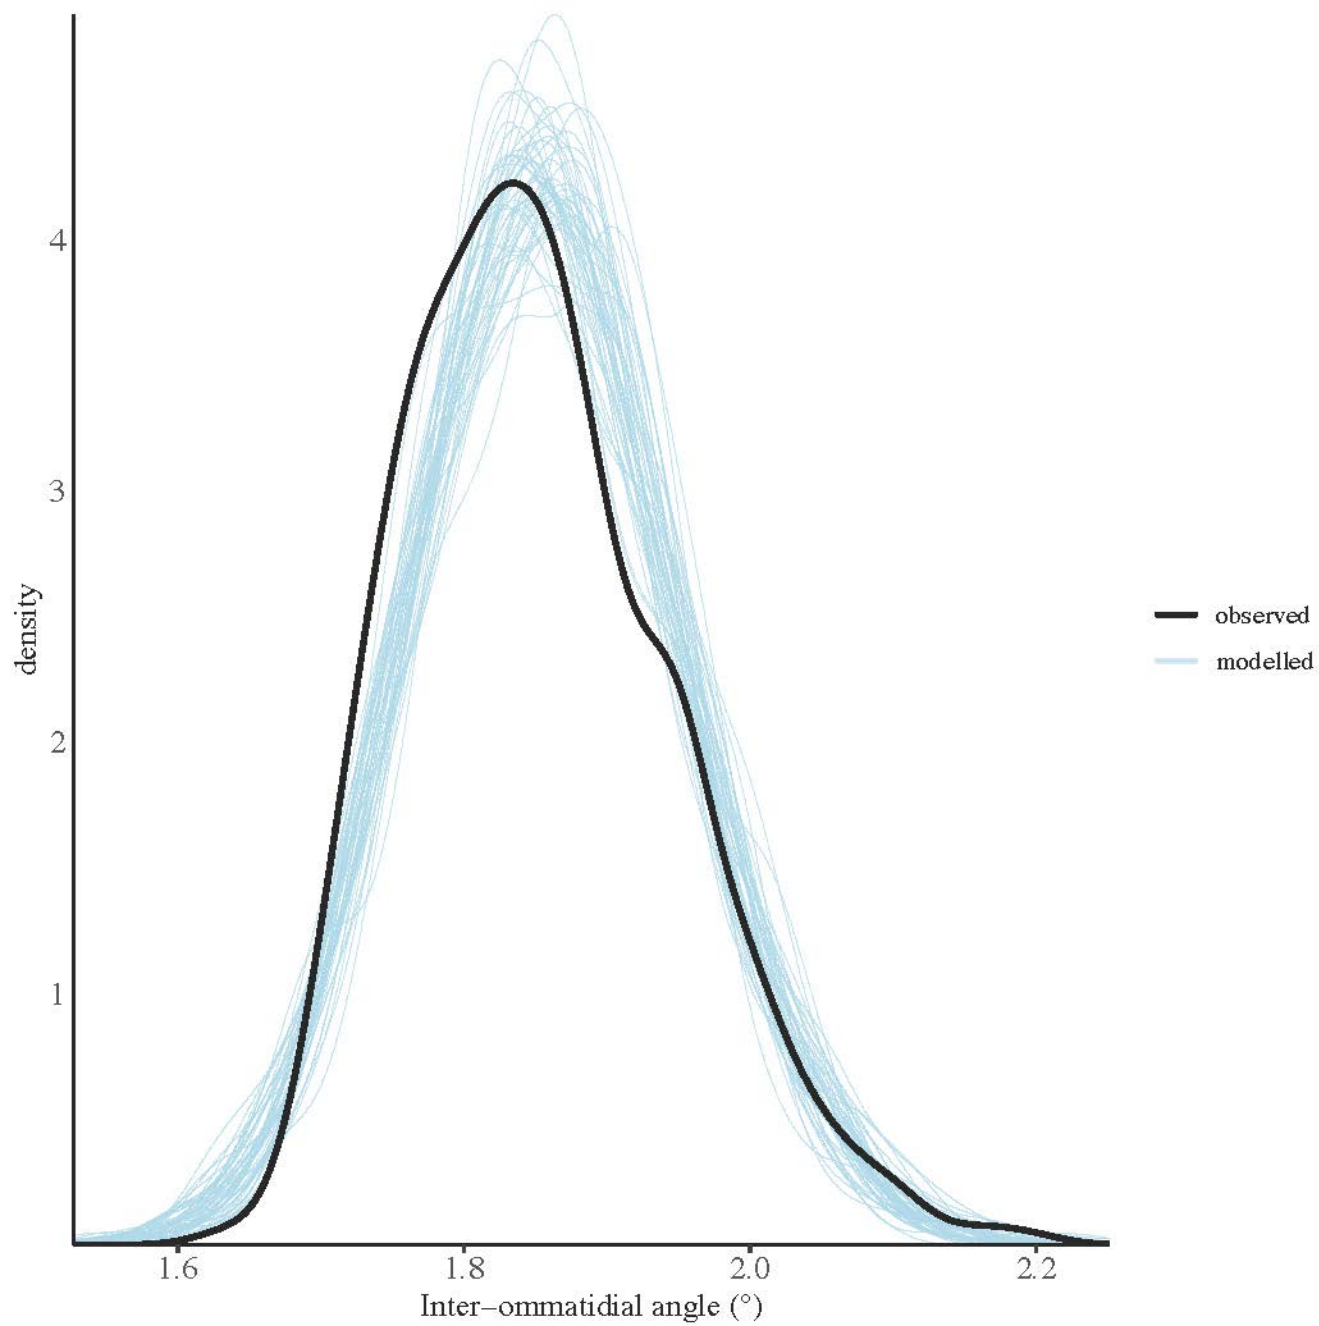

Facet number

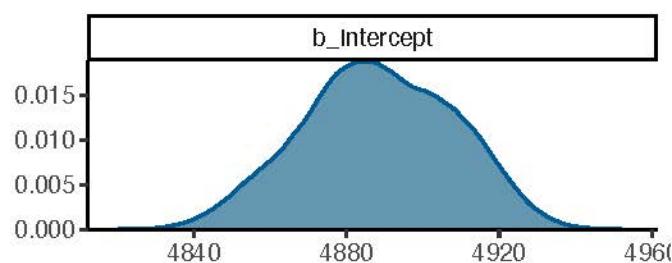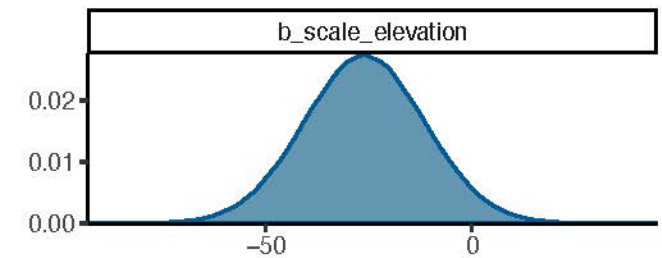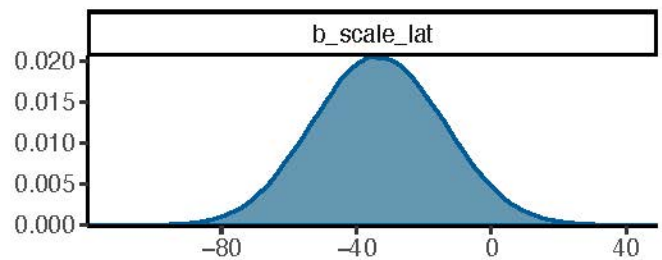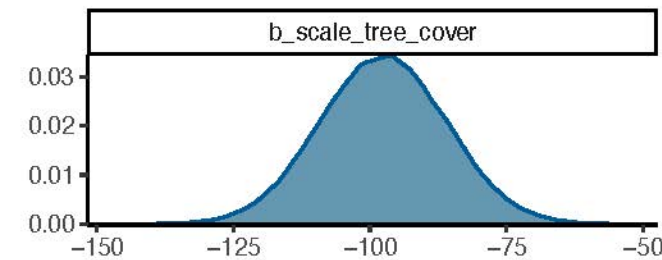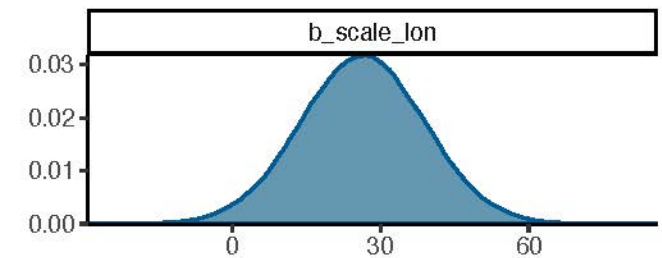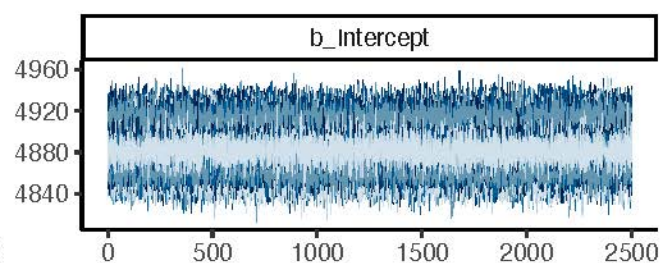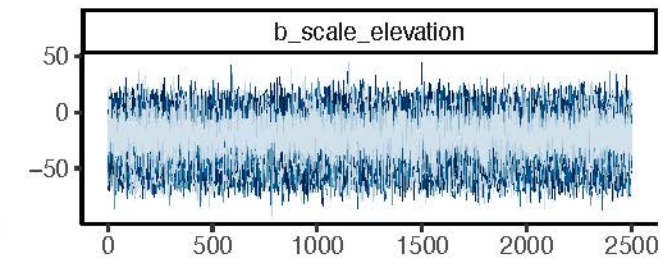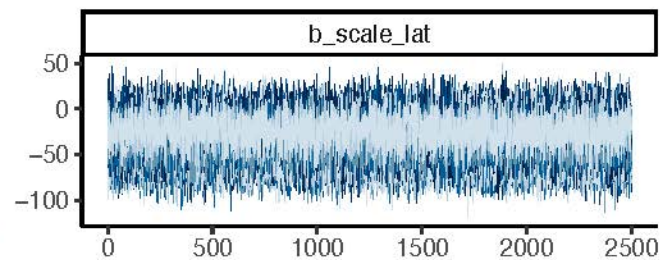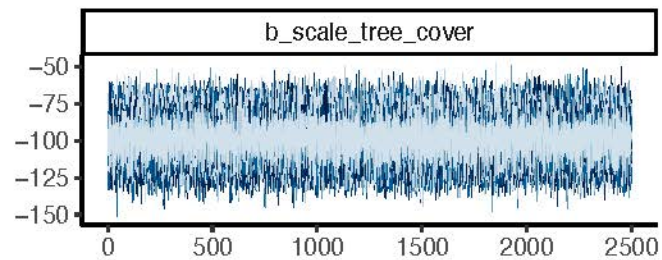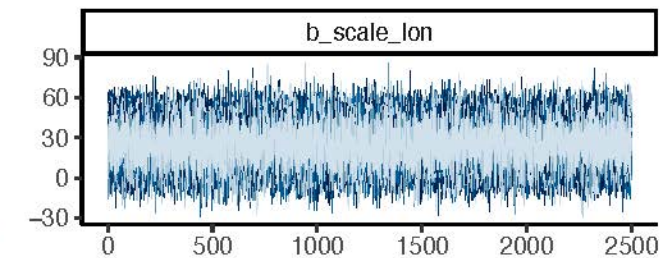



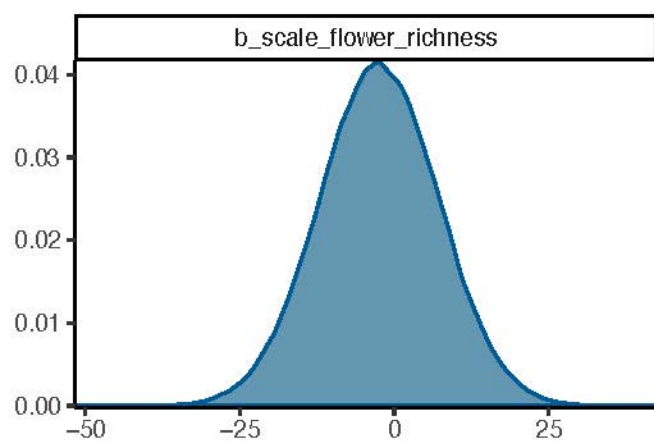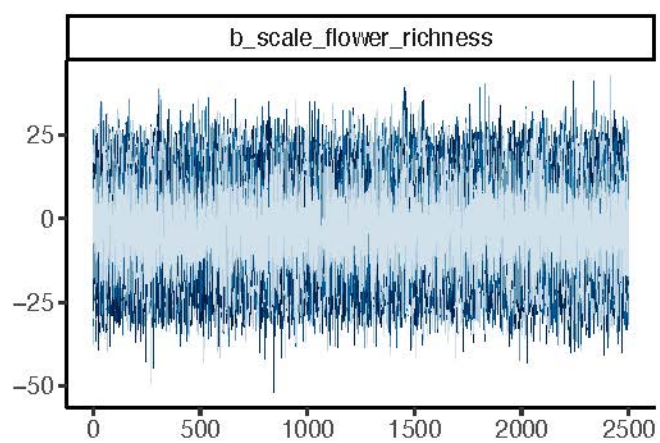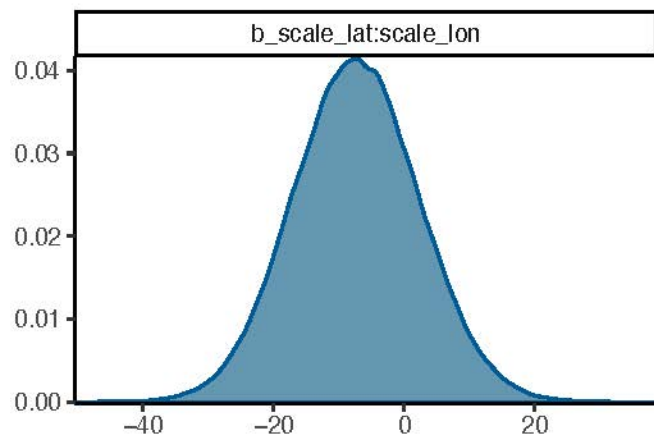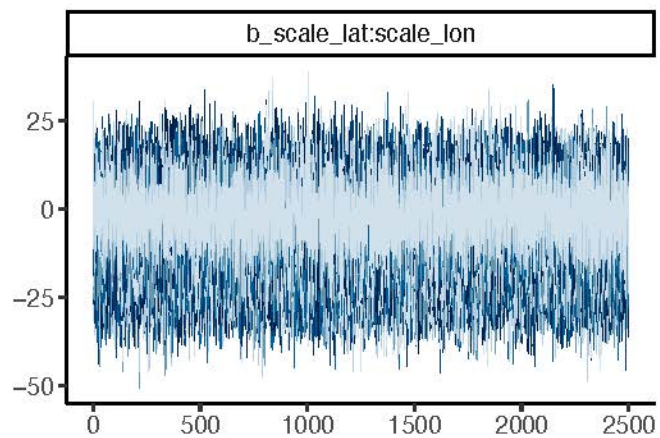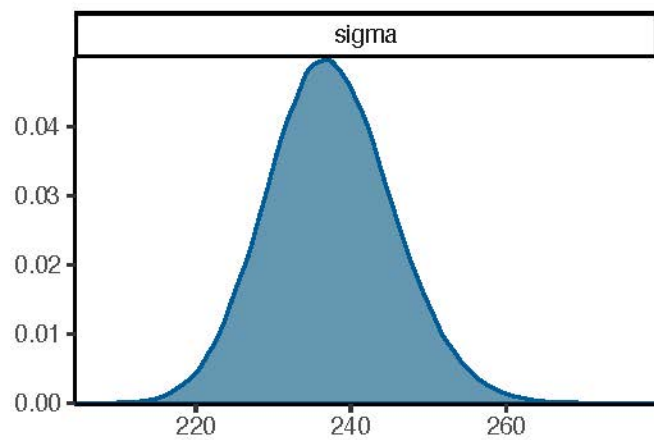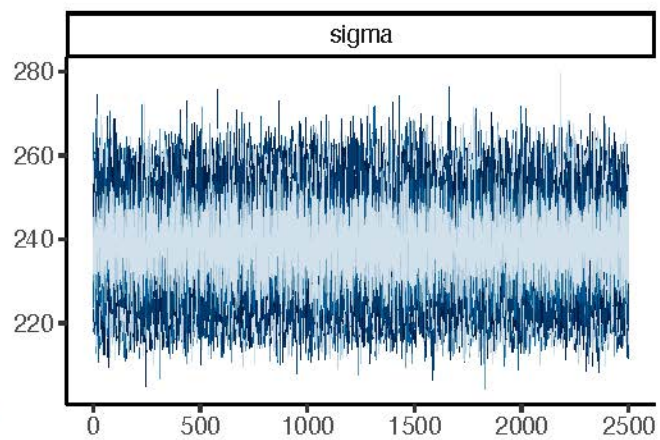

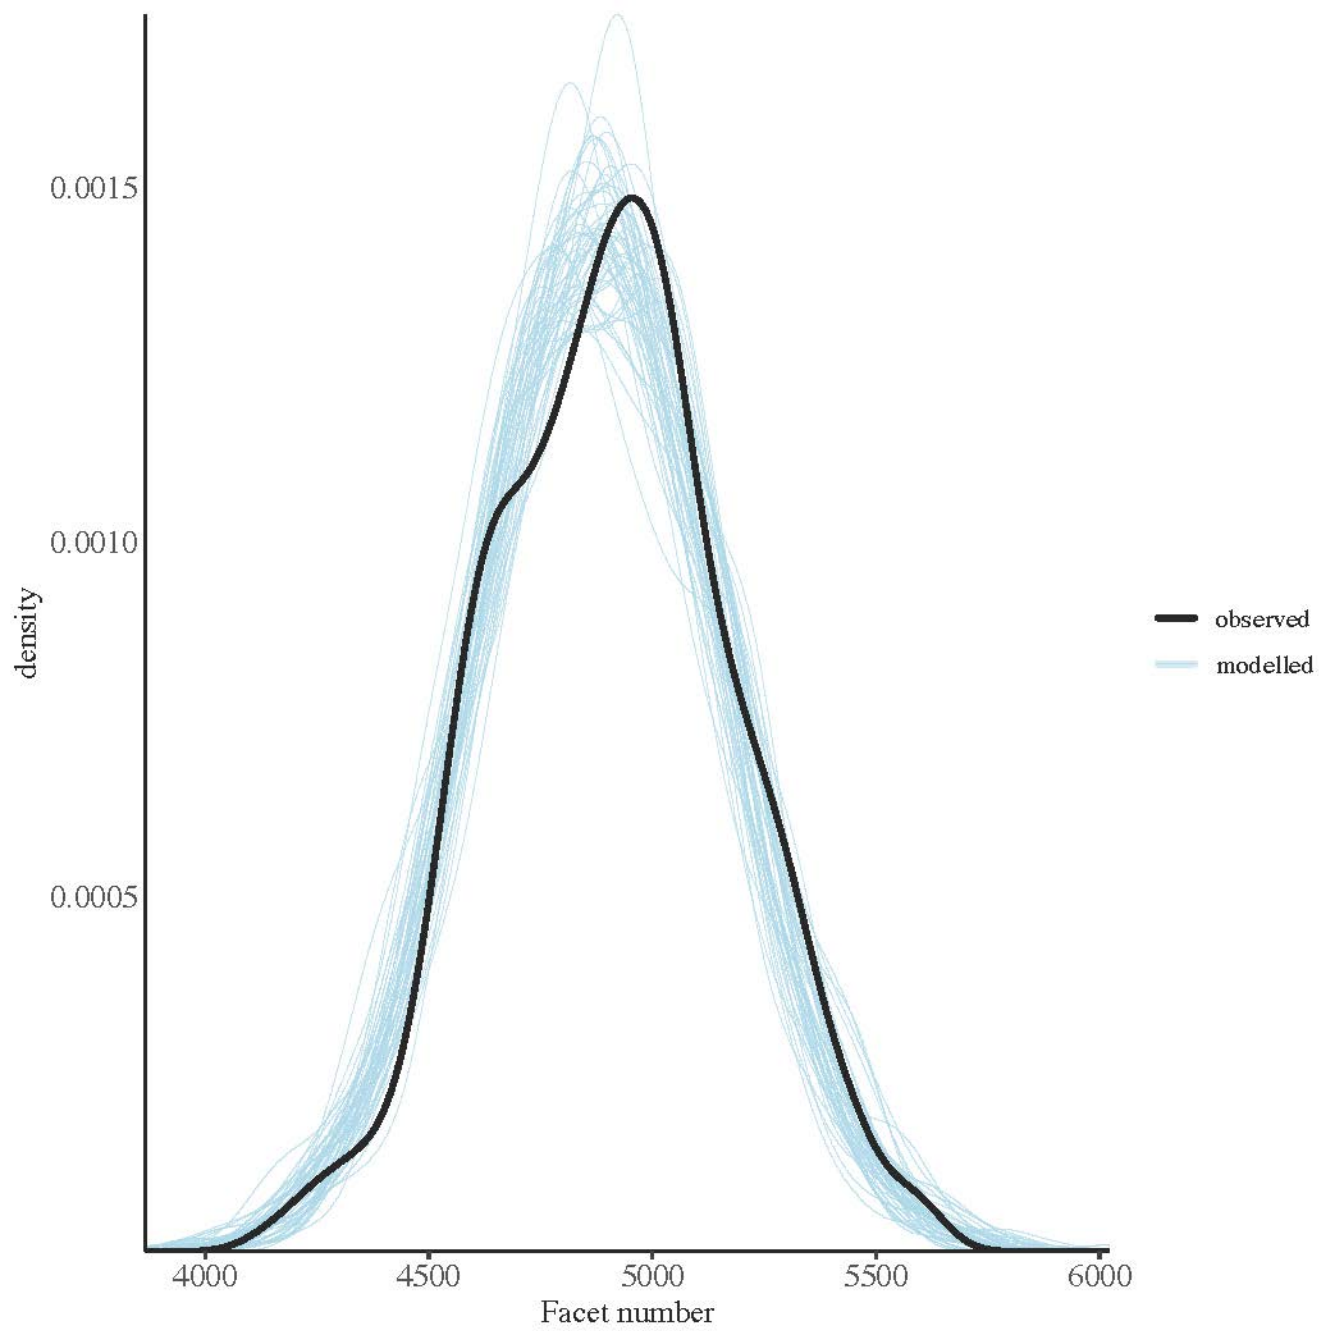

Eye parameter ( $\mu\text{m}\cdot\text{rad}$ )



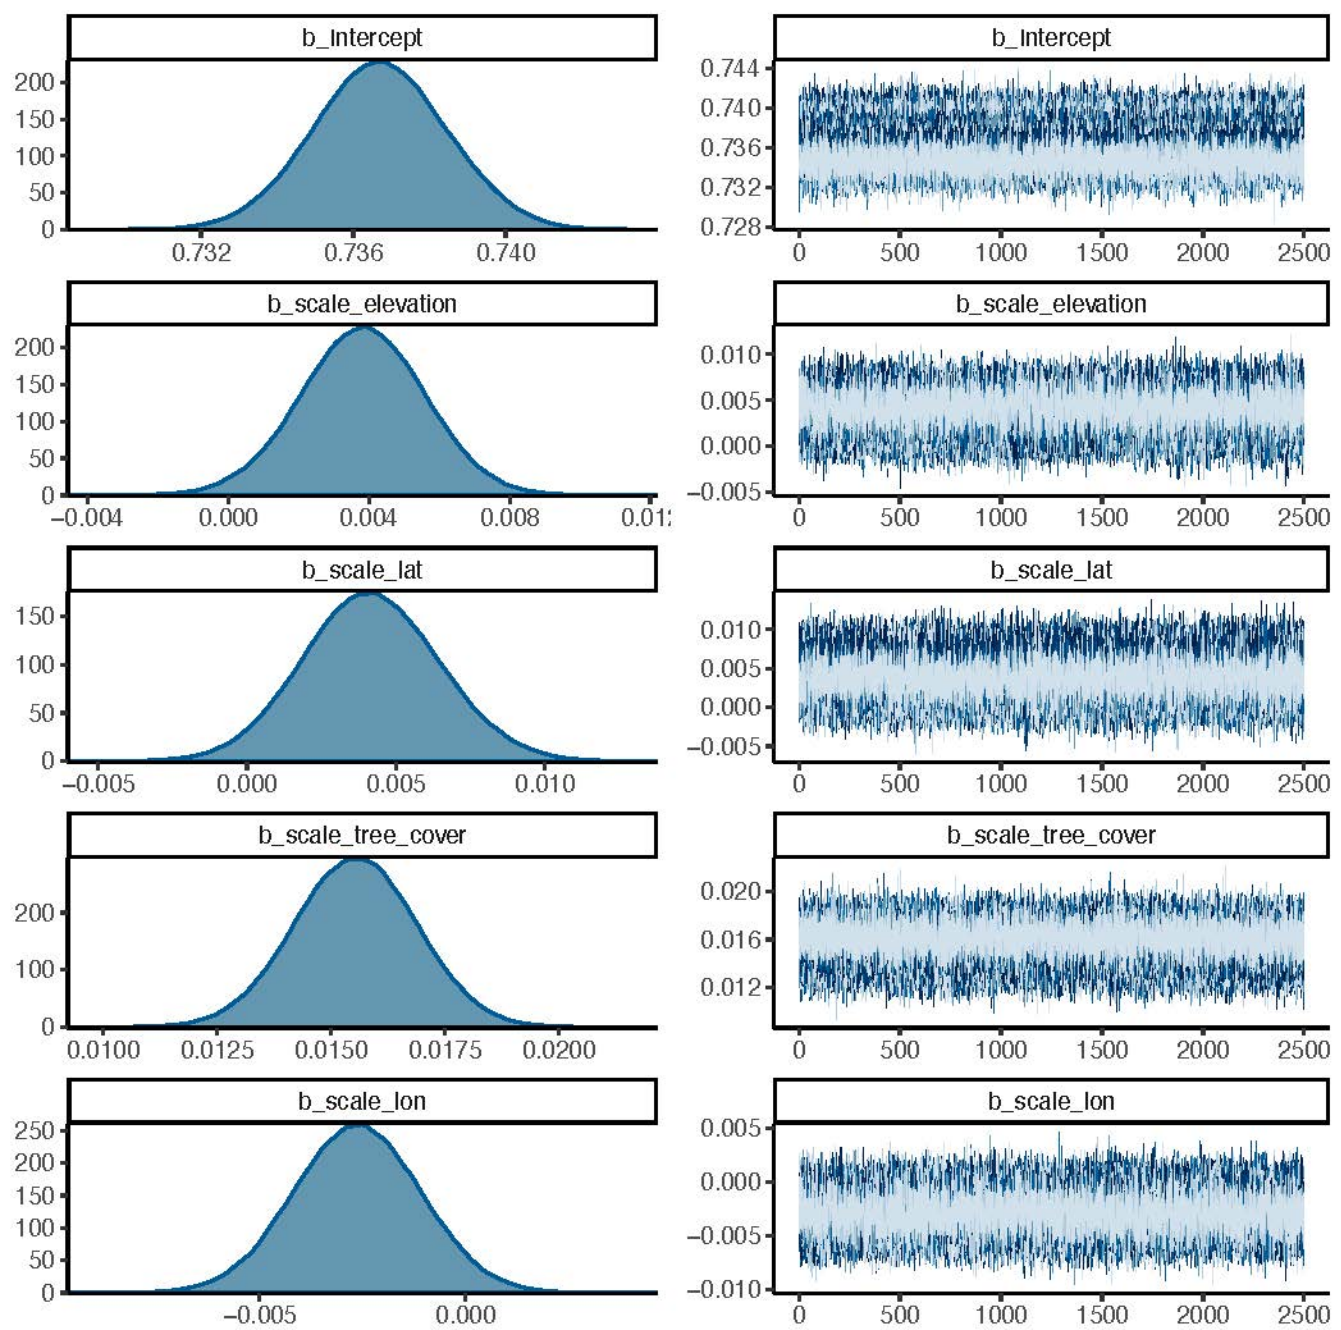

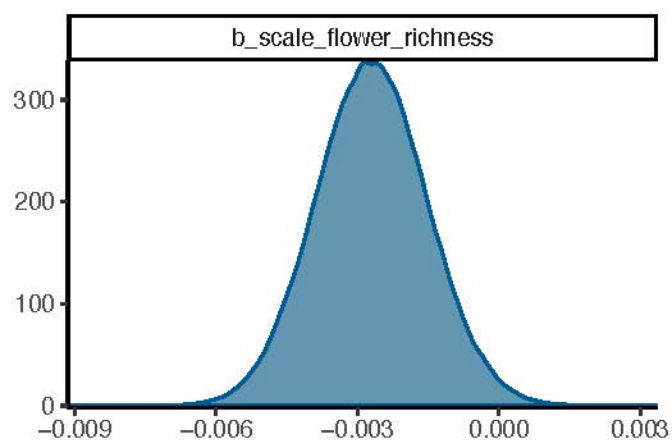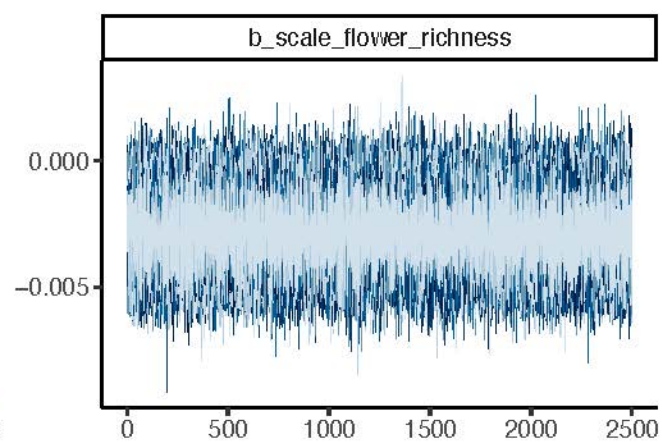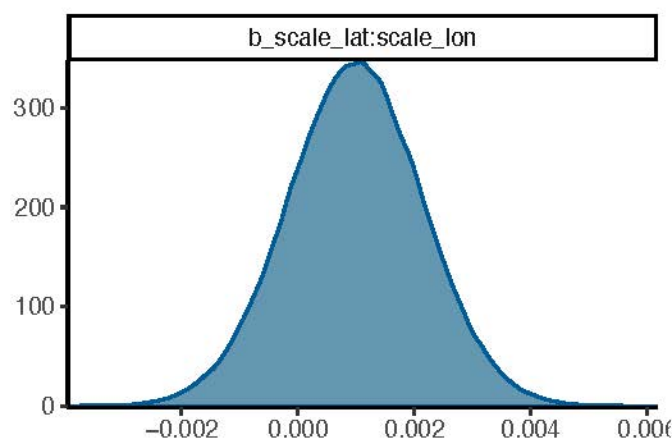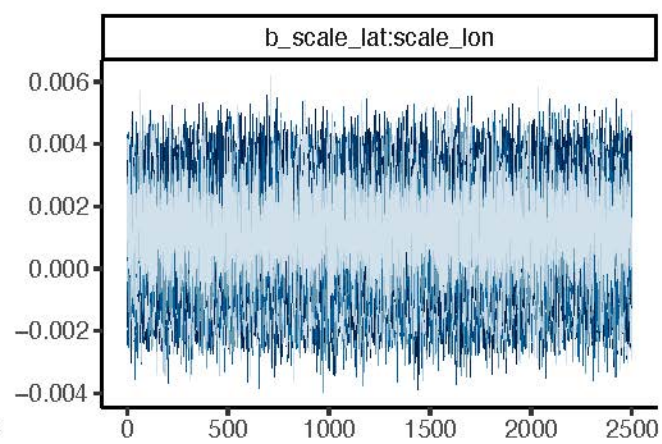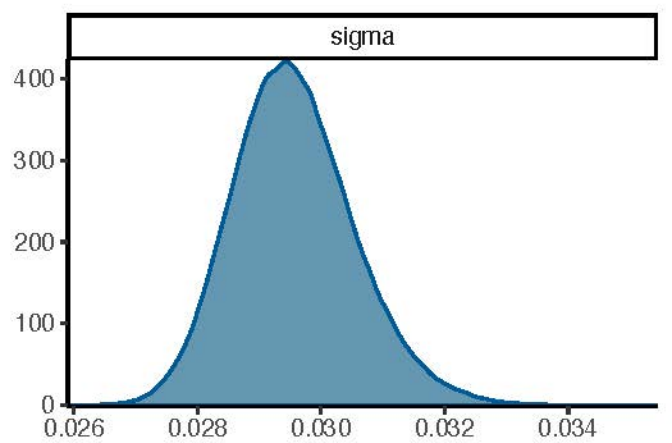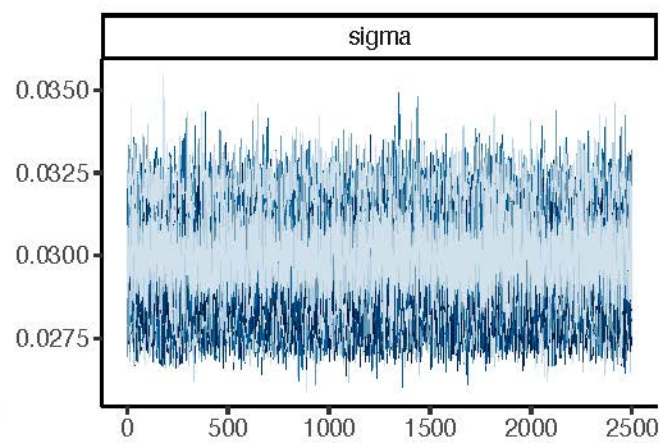

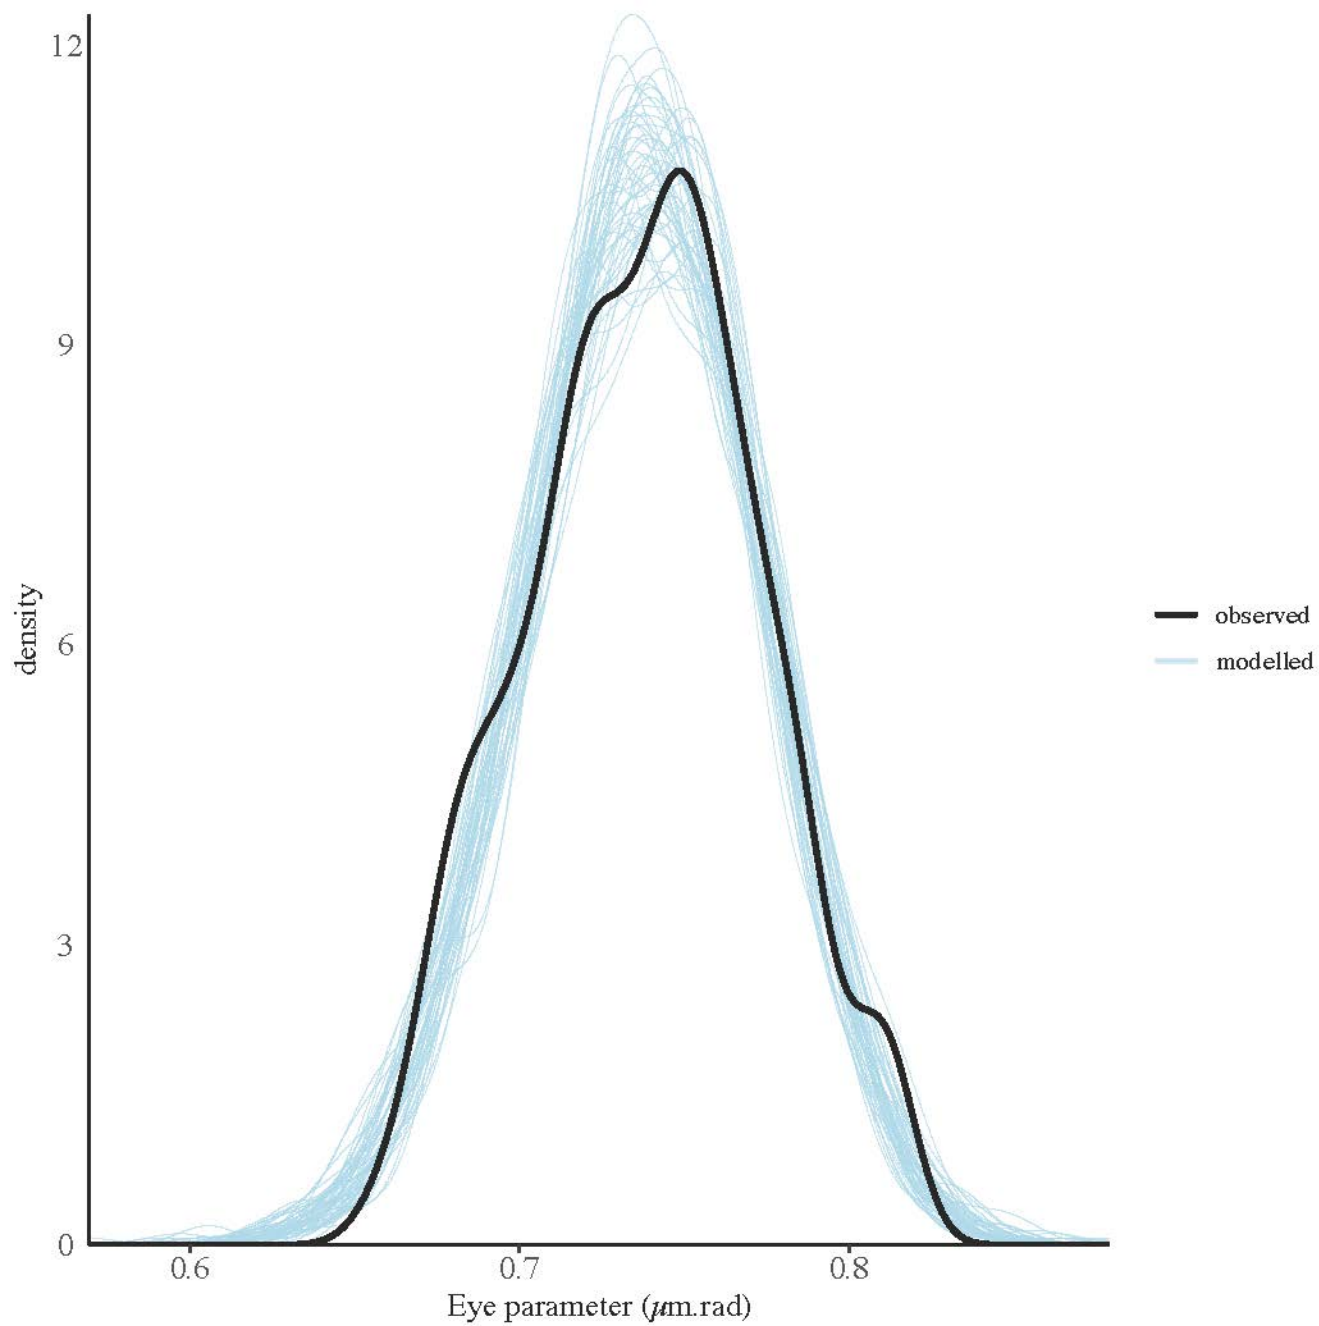

Curvature ( $\mu\text{m}$ )

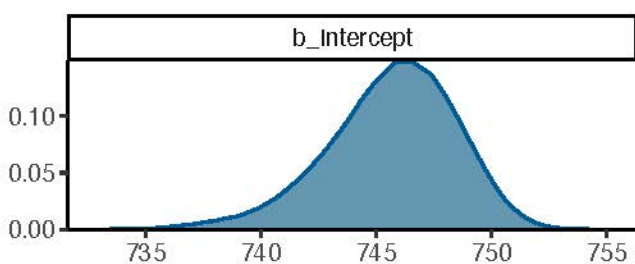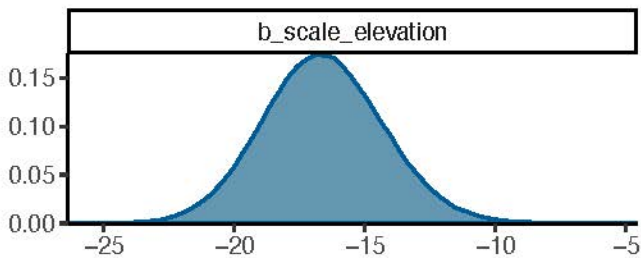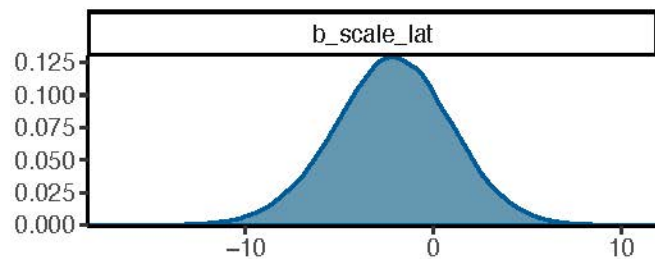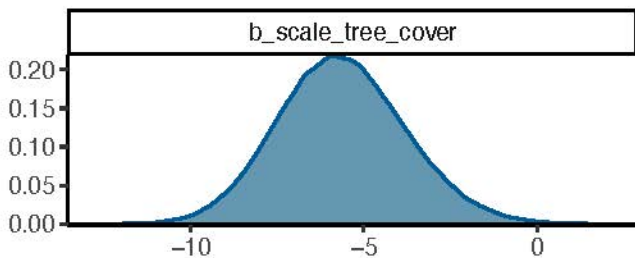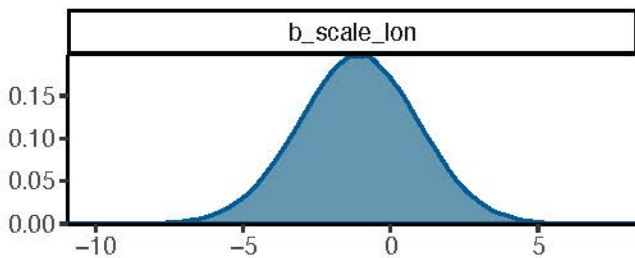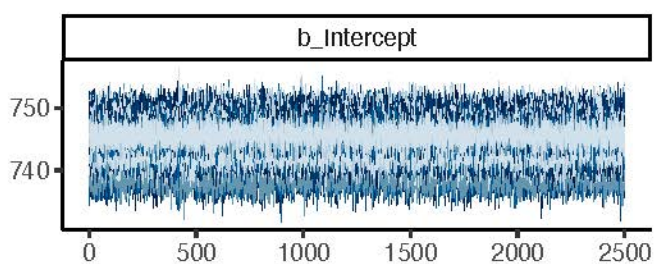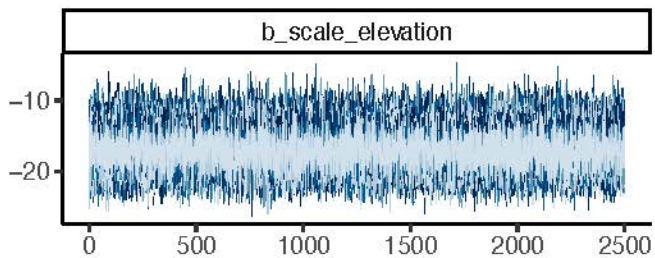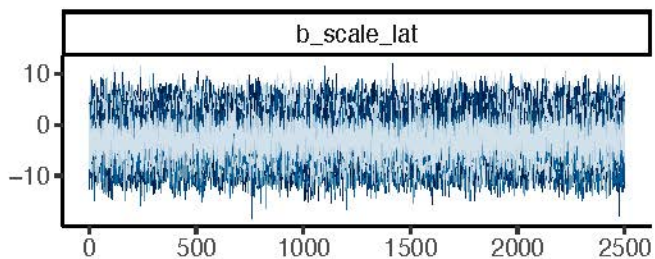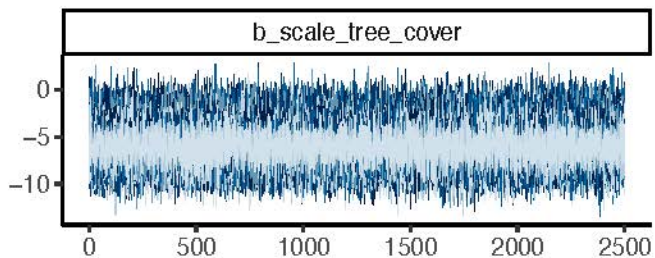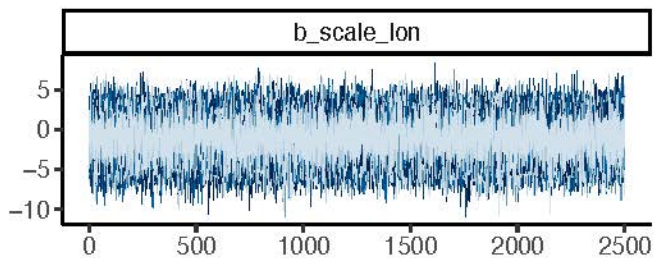



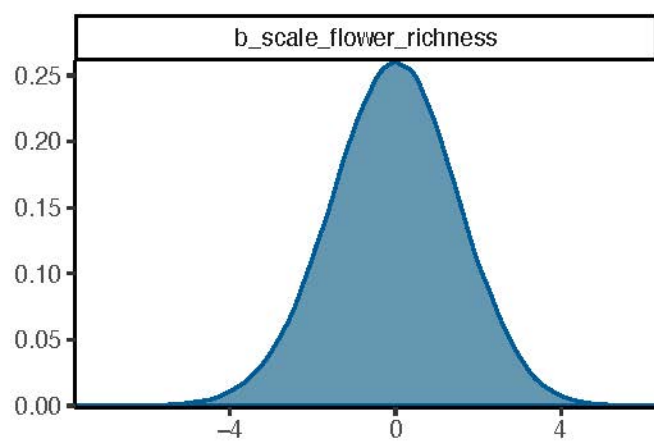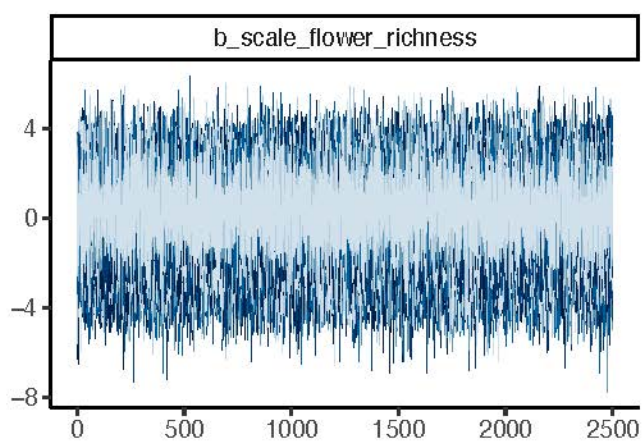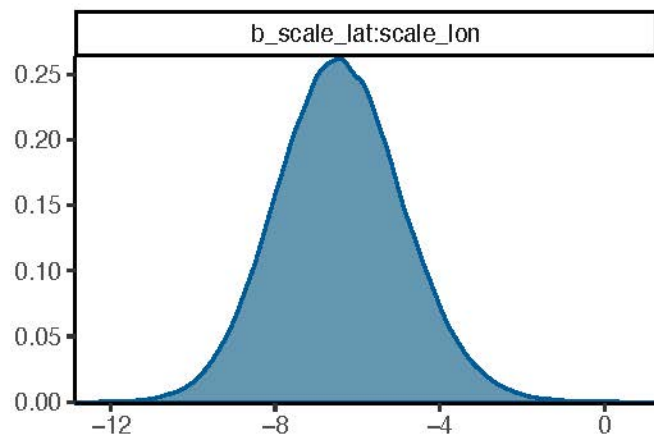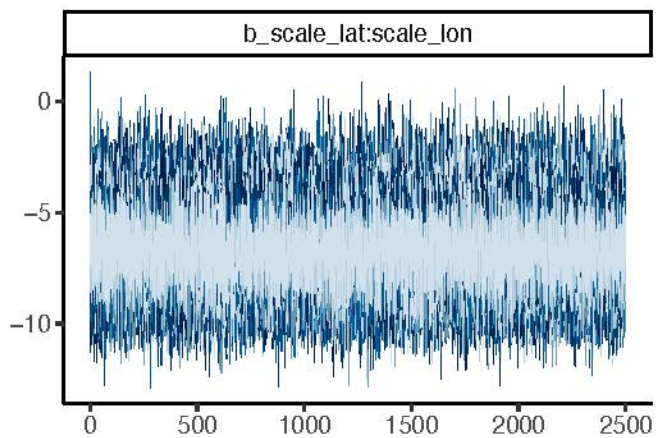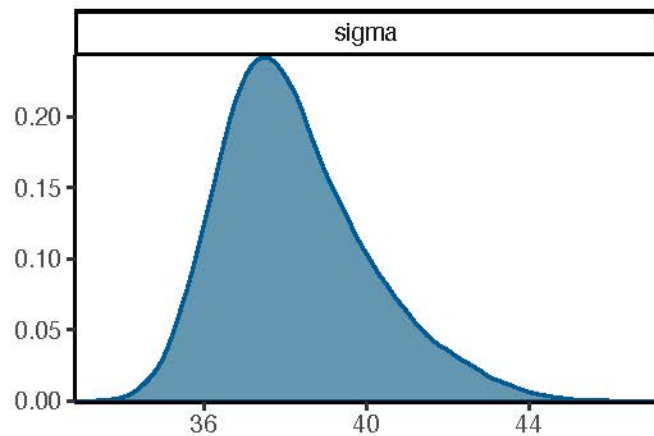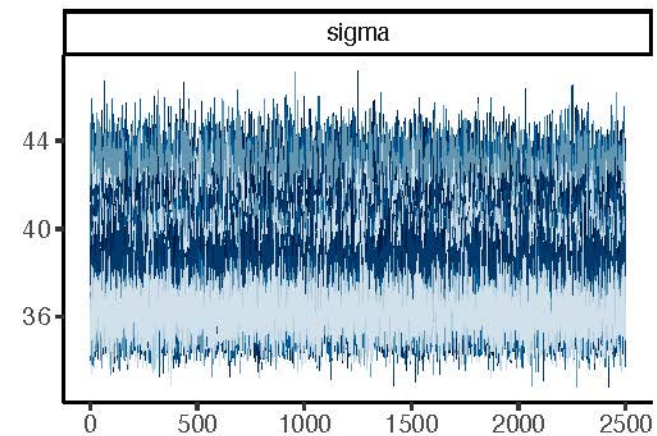

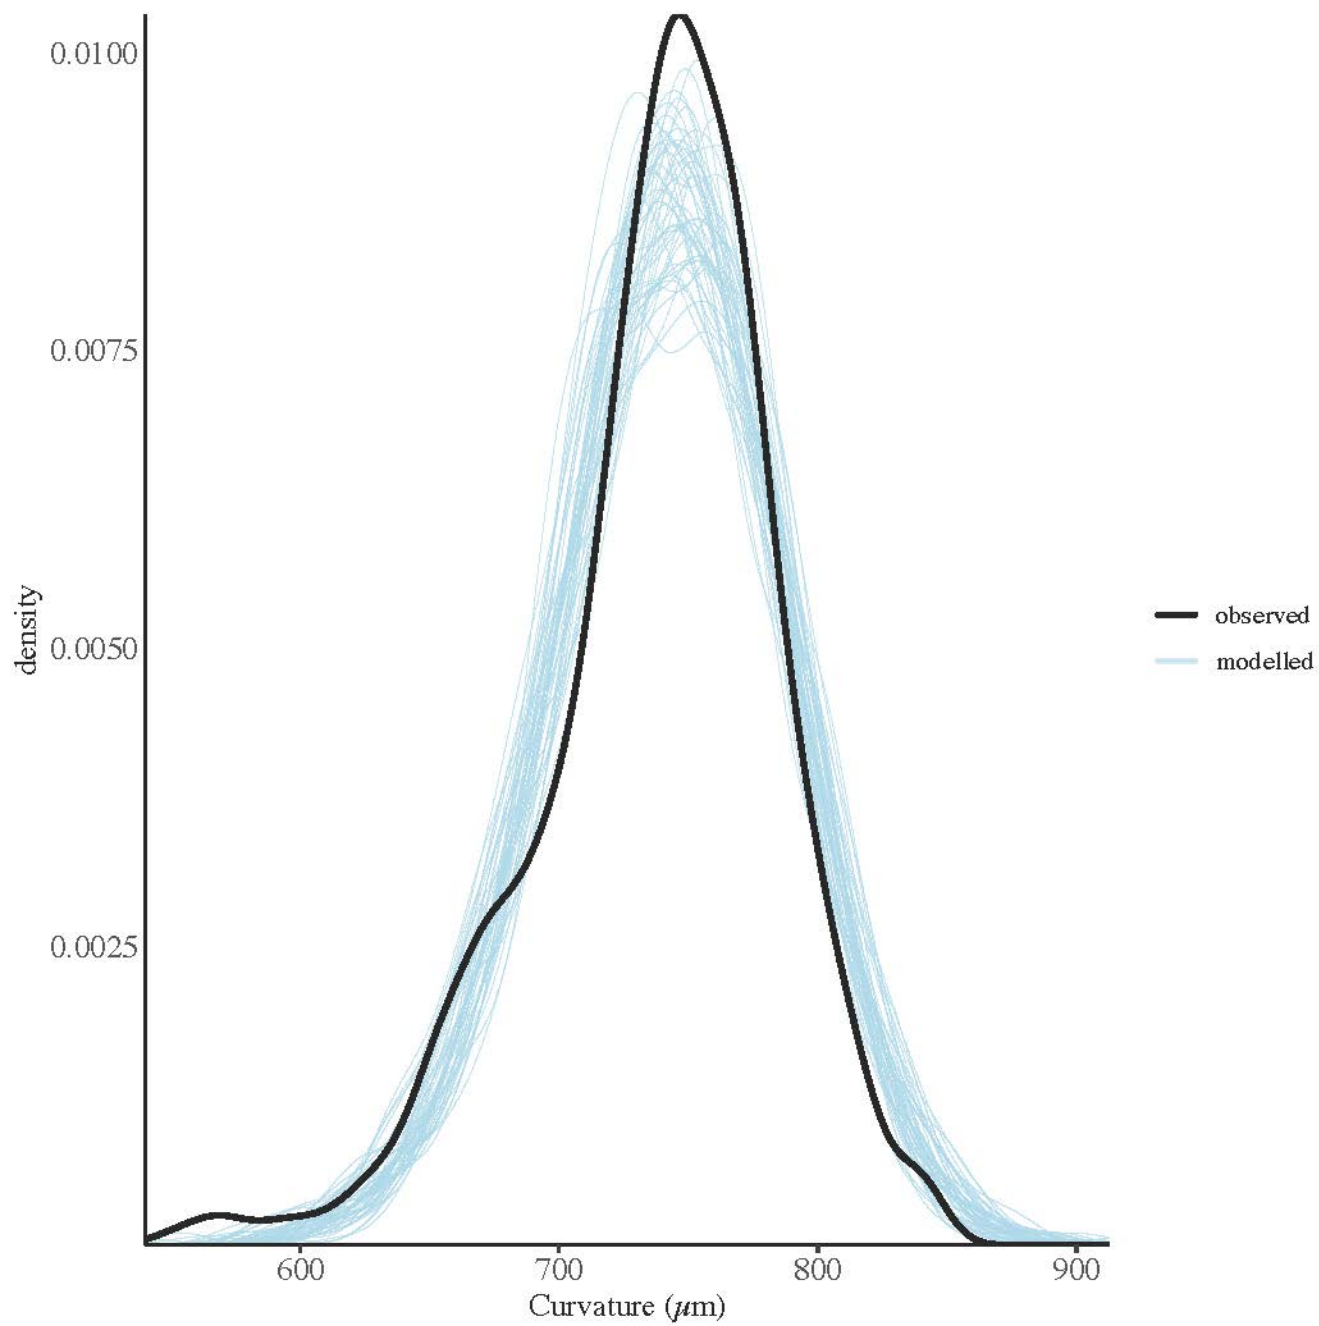

Central ocellus diameter ( $\mu\text{m}$ )



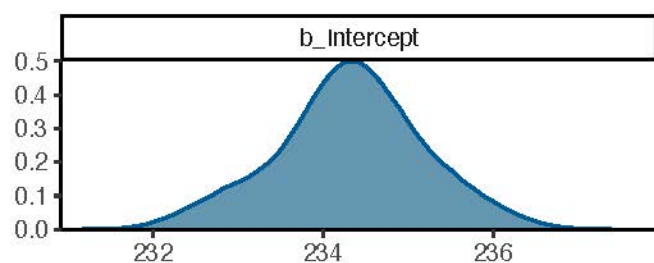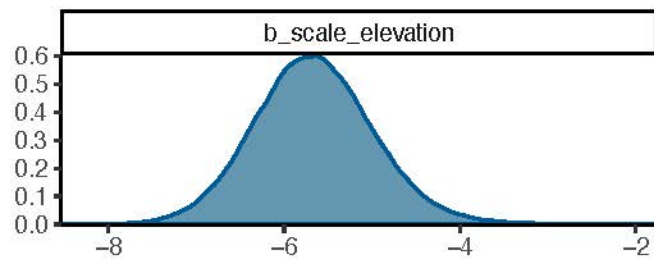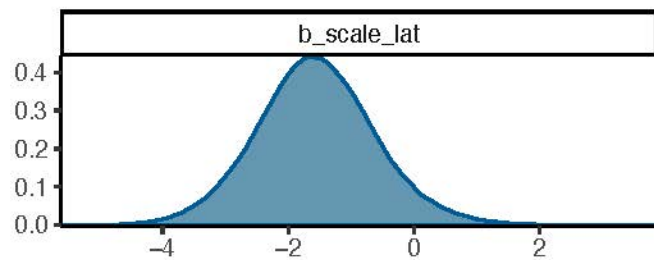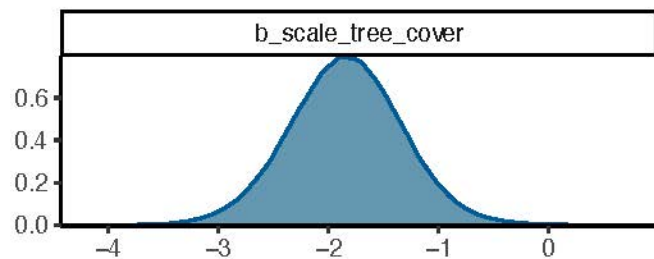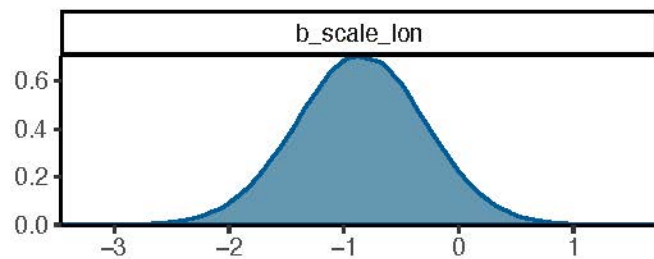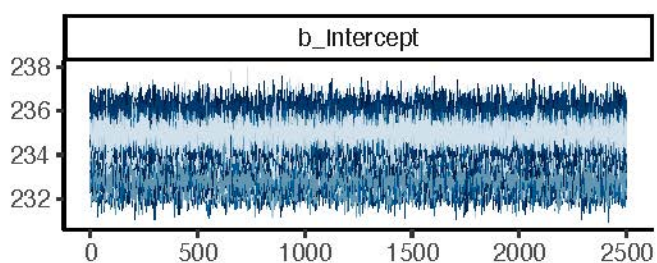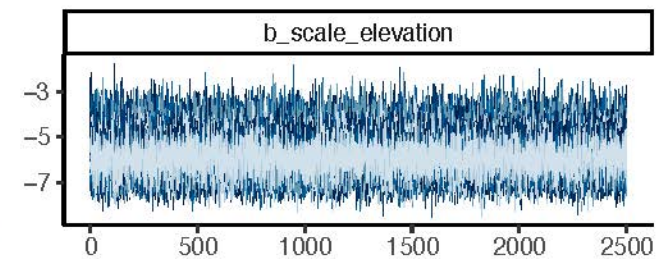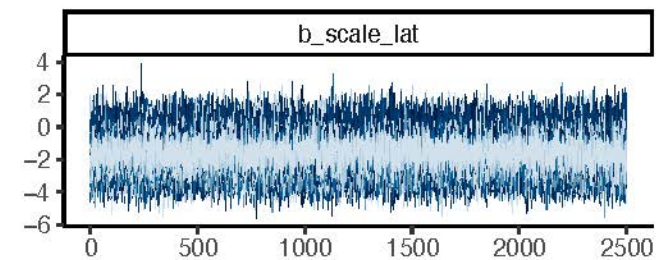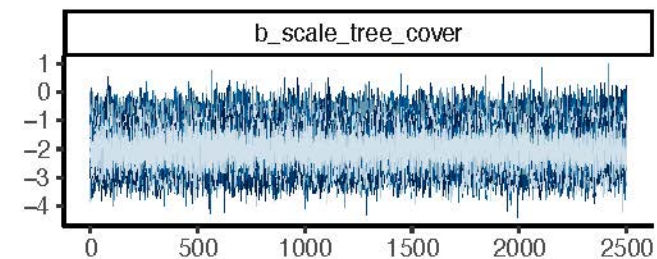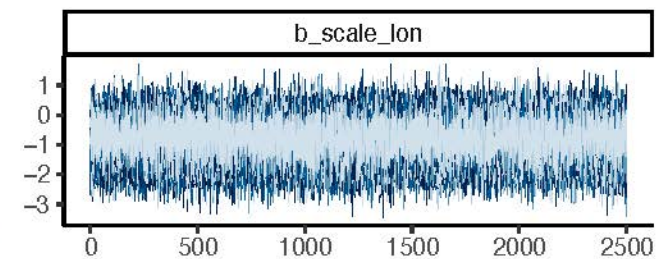

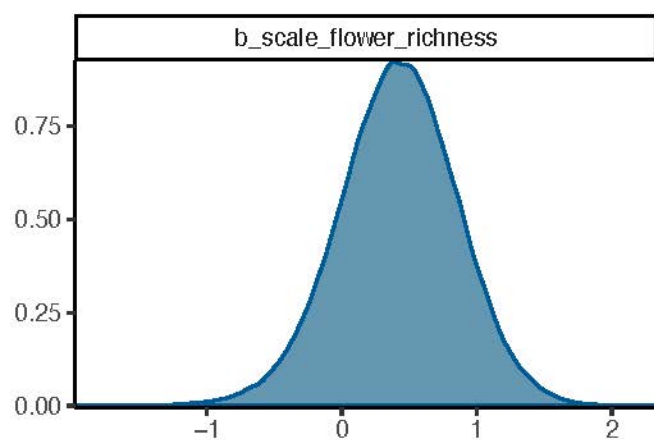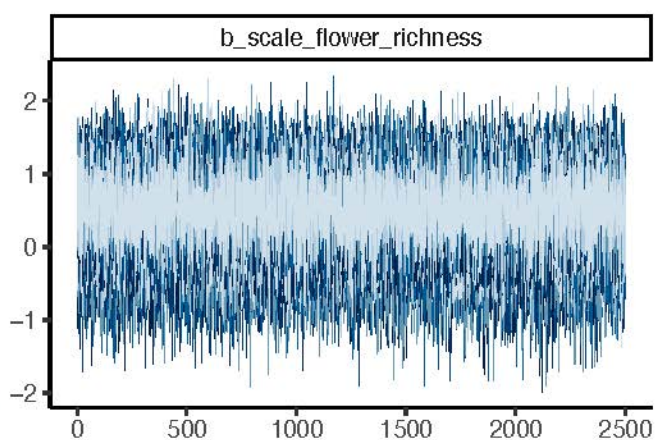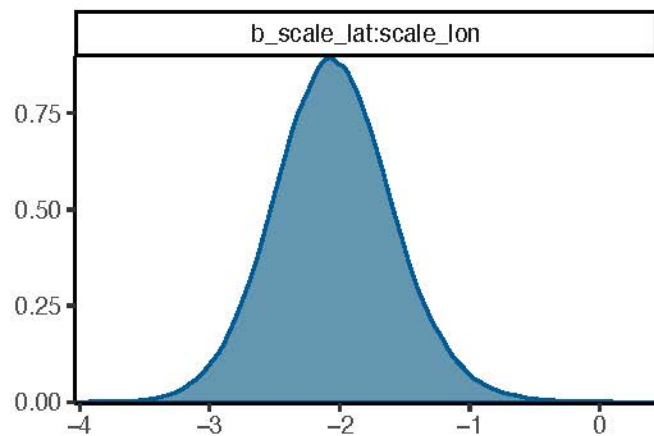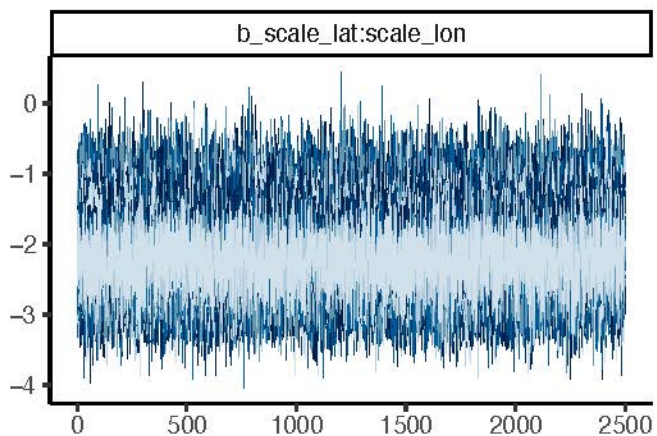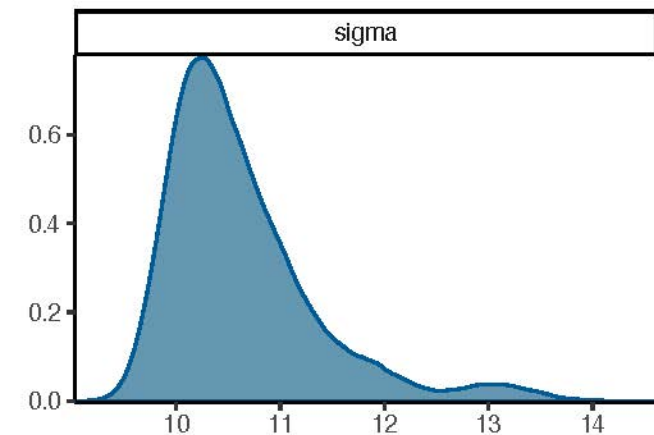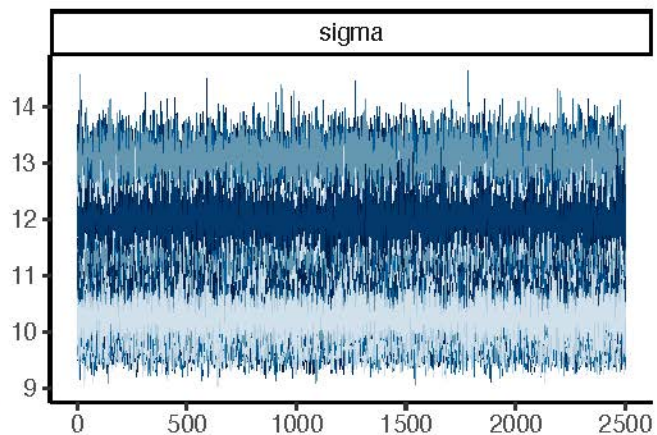

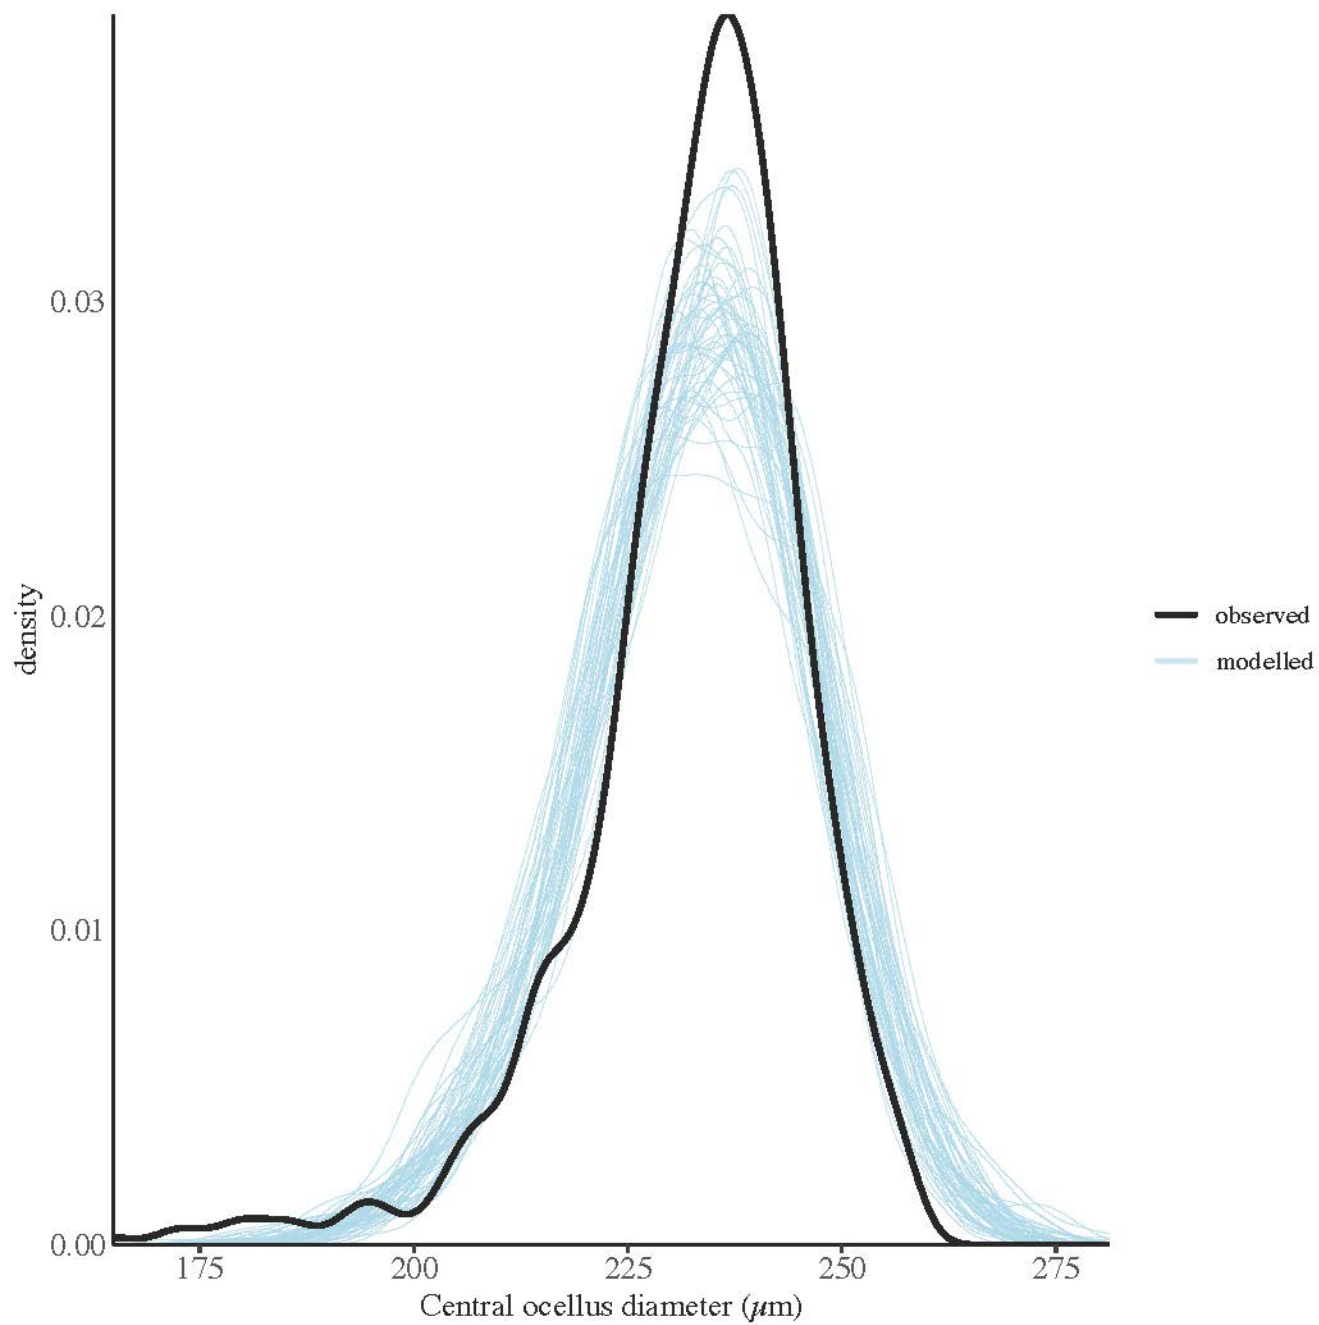

Lateral ocelli diameter ( $\mu\text{m}$ )

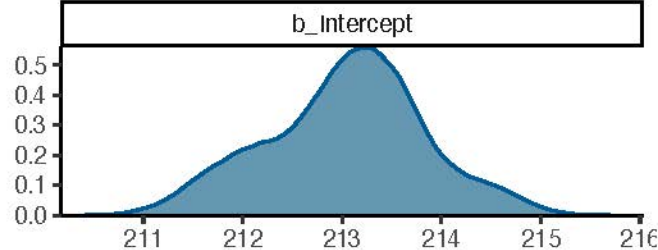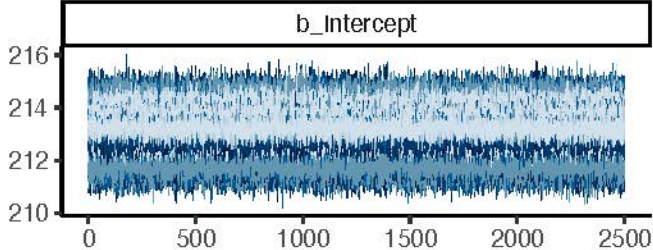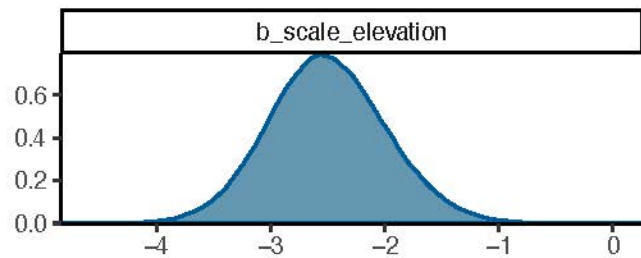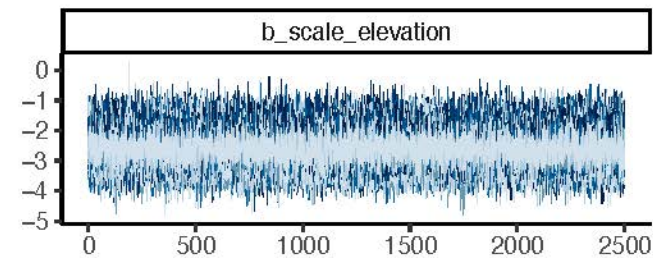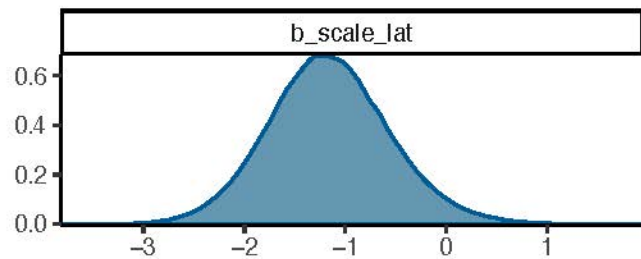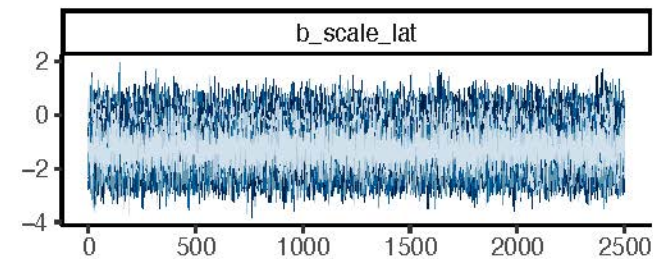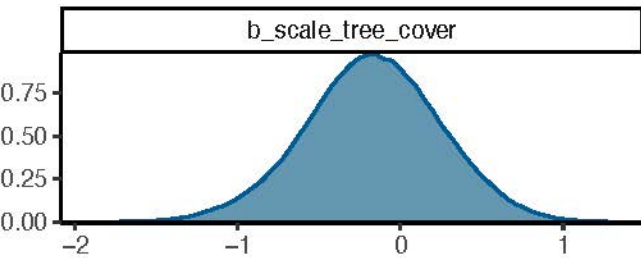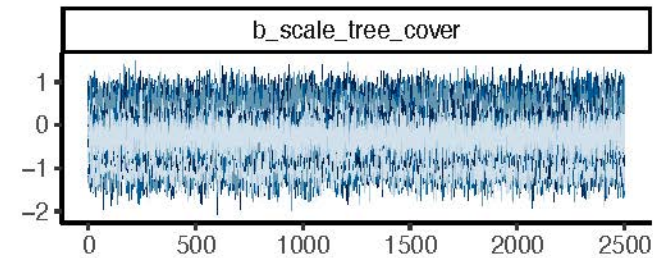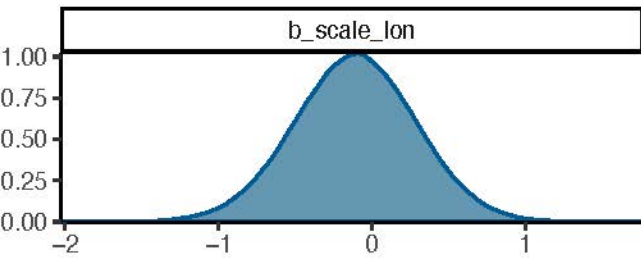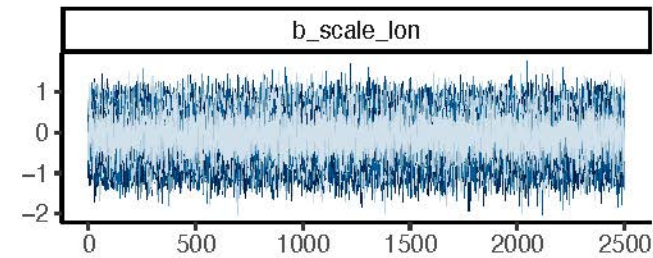



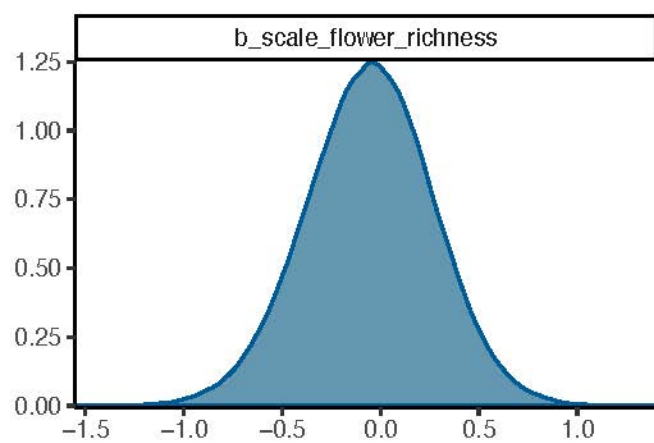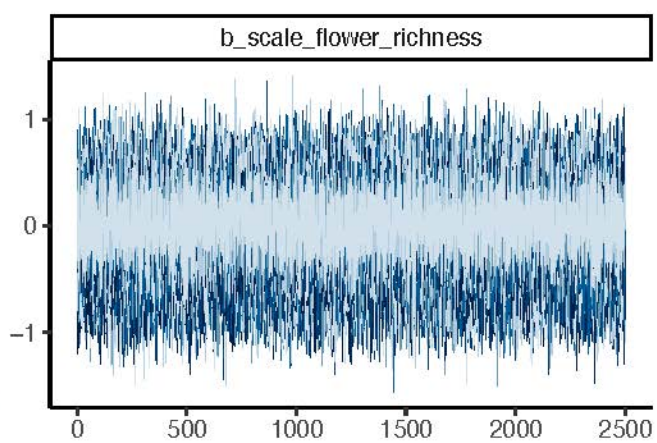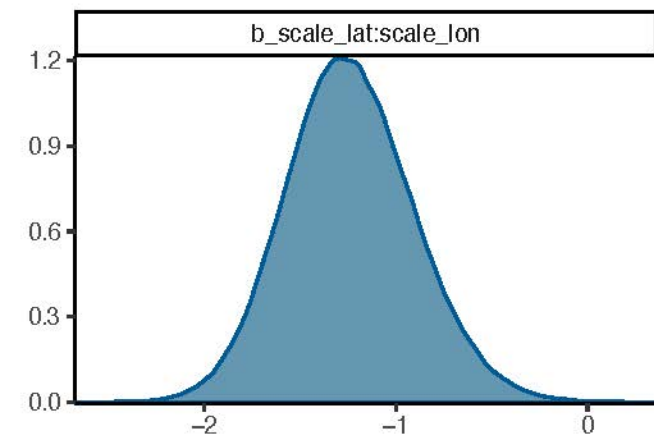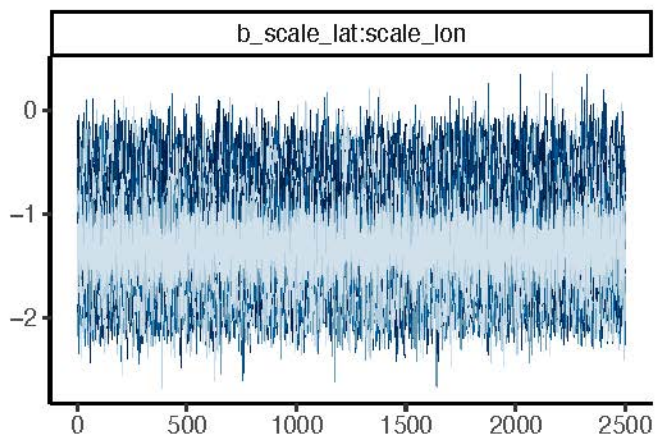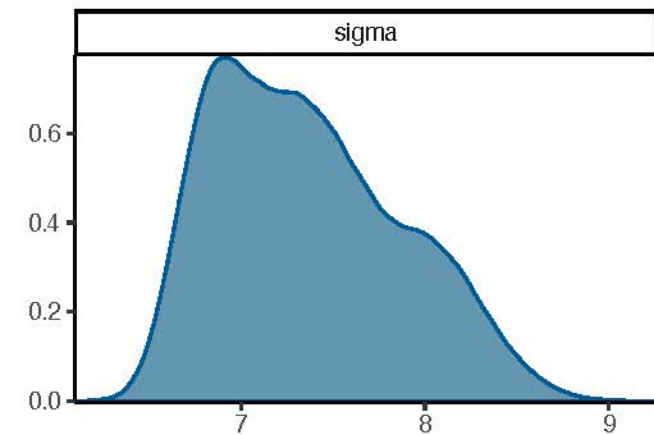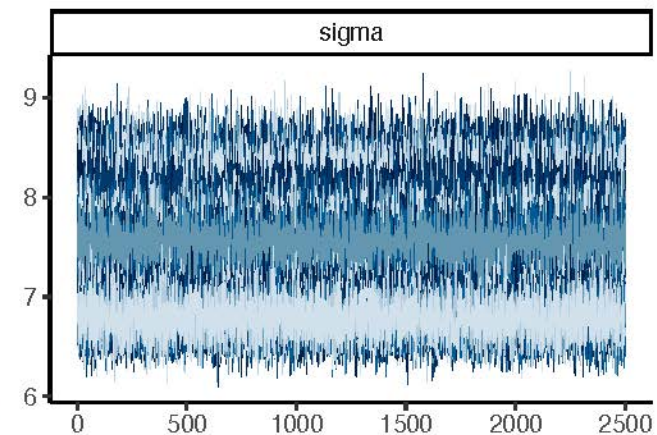

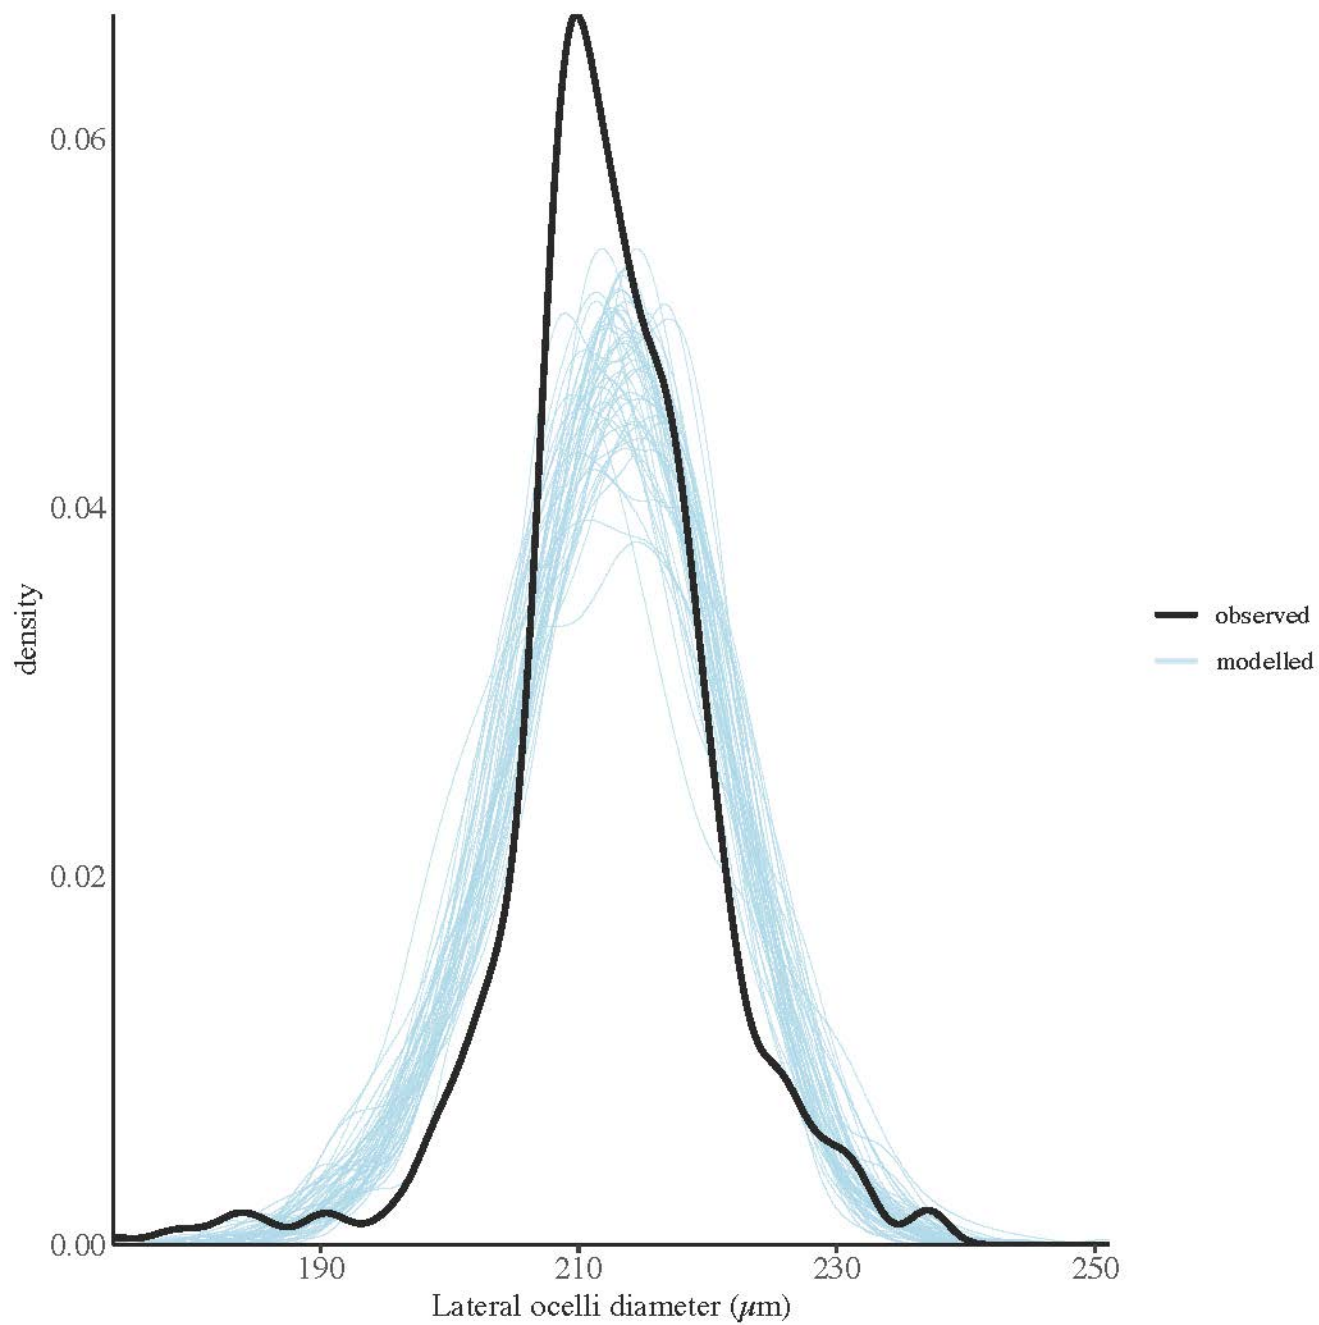

Ocellar alignment ( $^{\circ}$ )



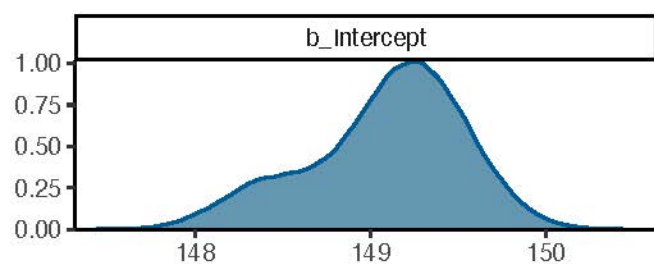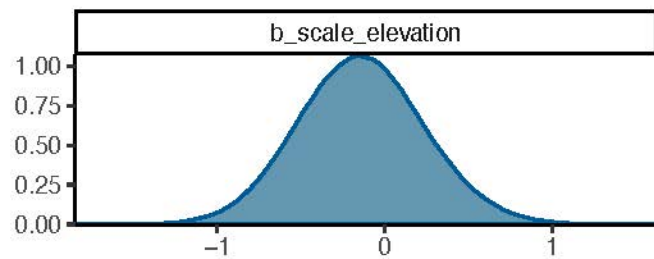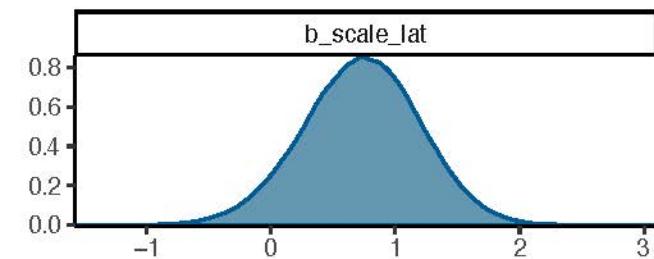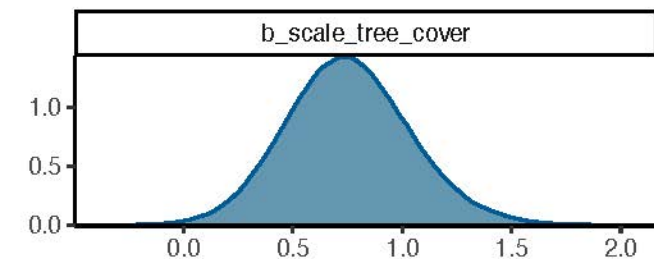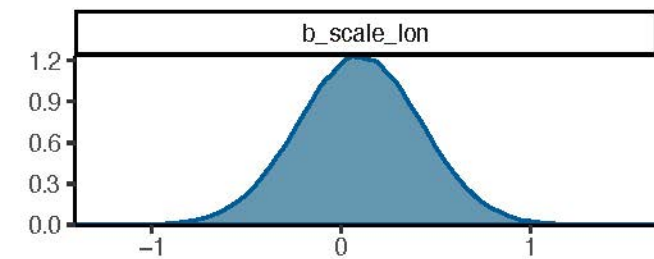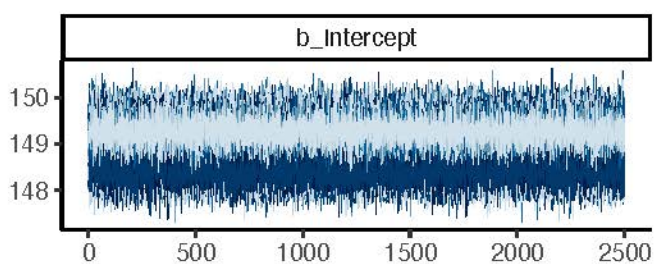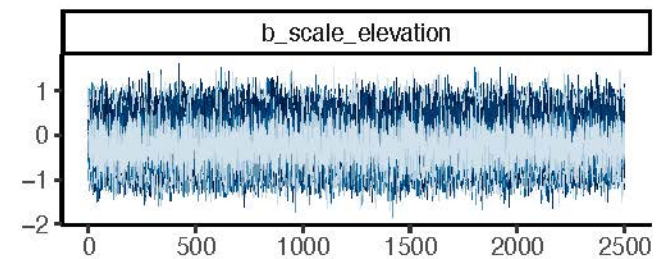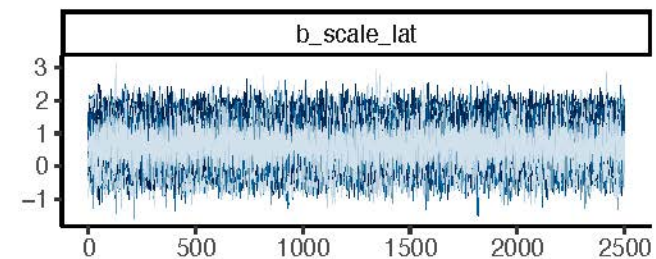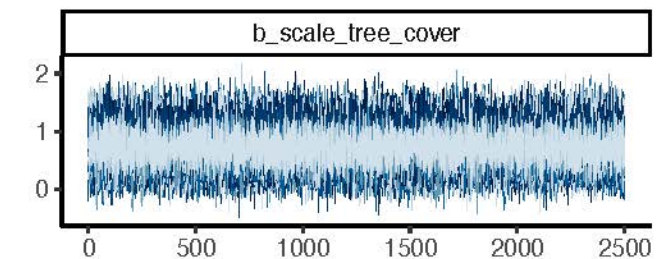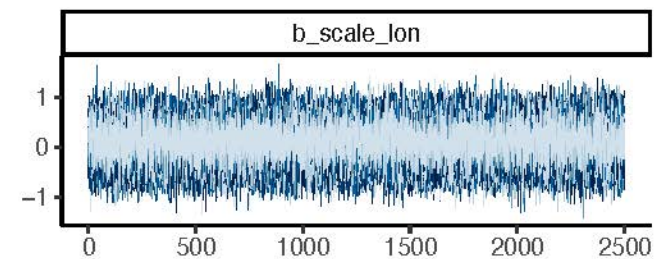

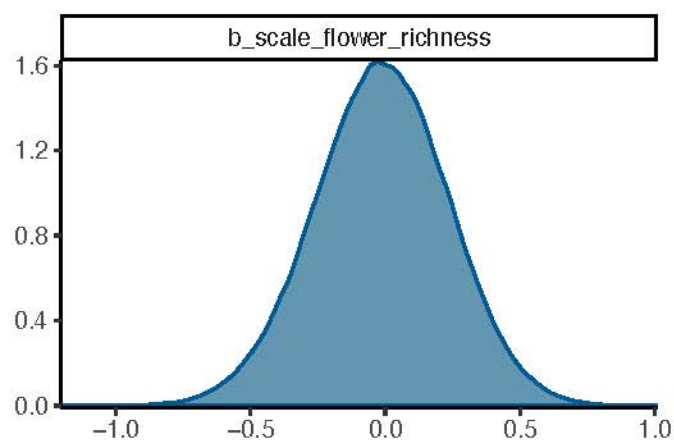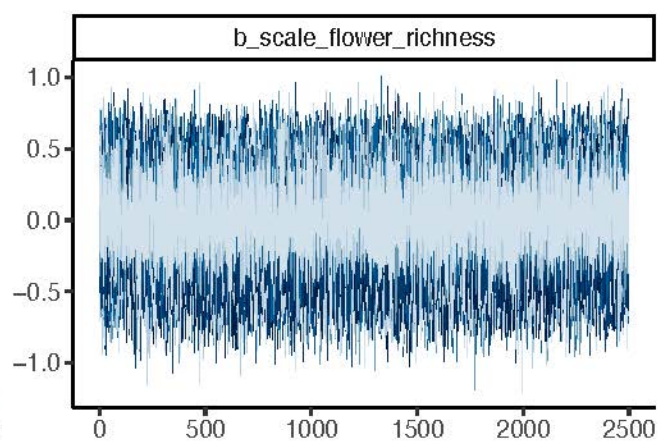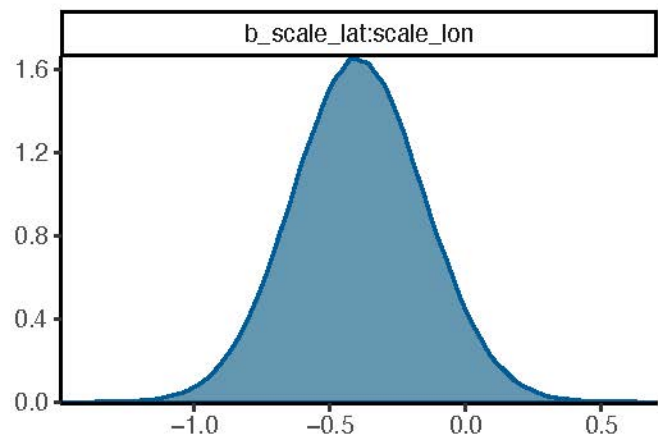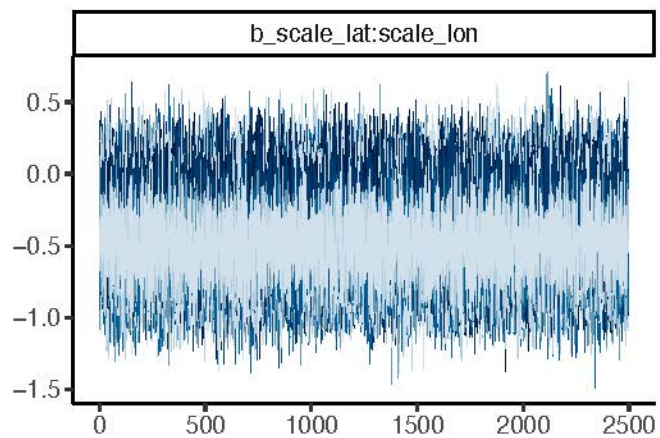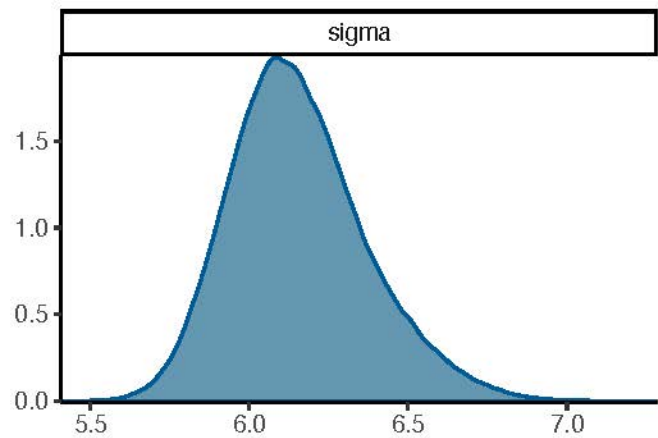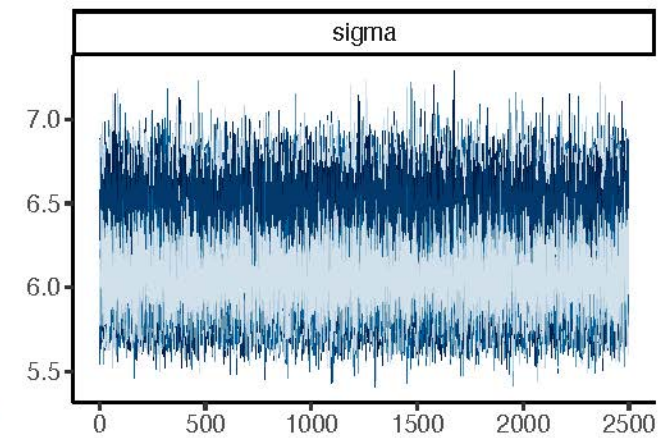

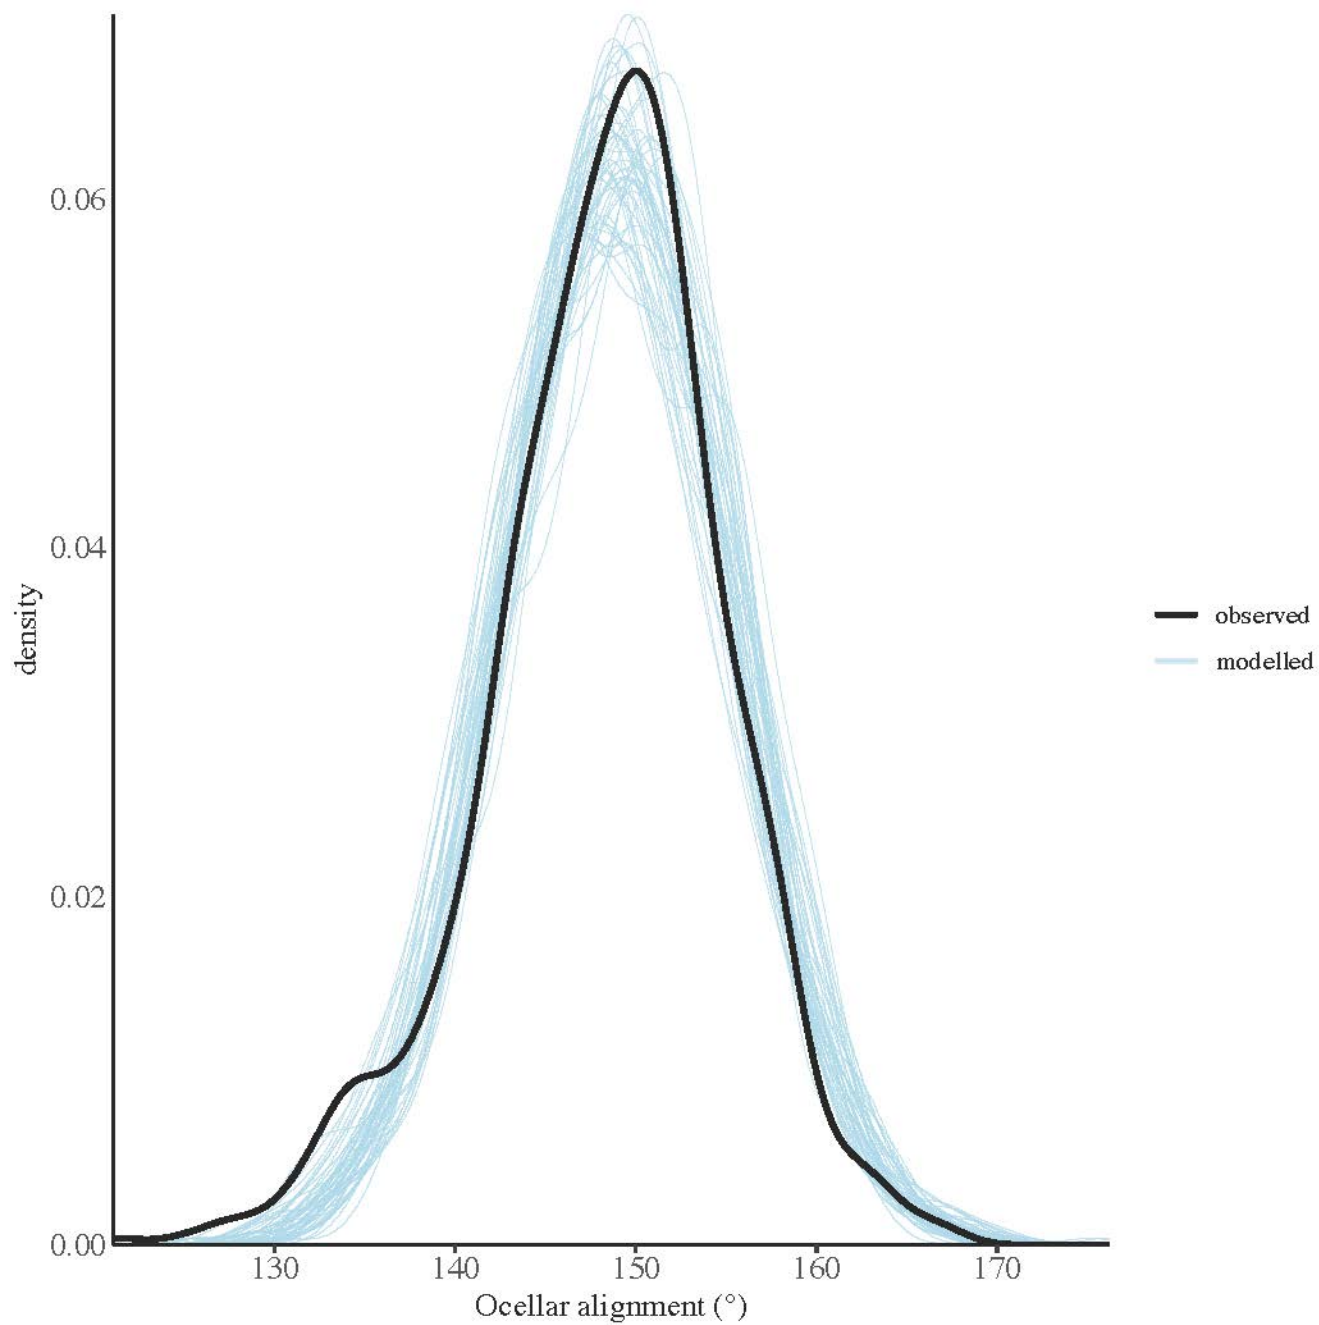

Monocular FOV (%)

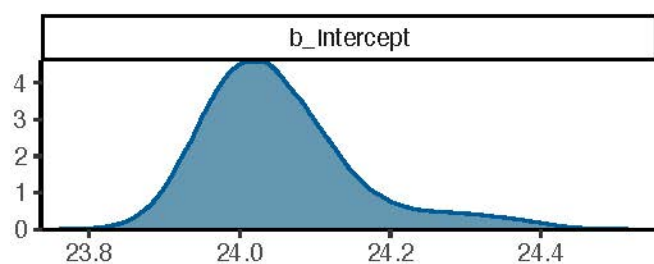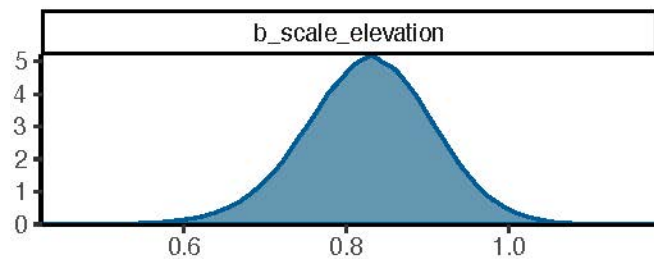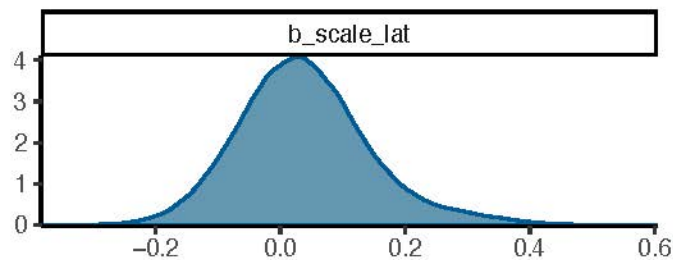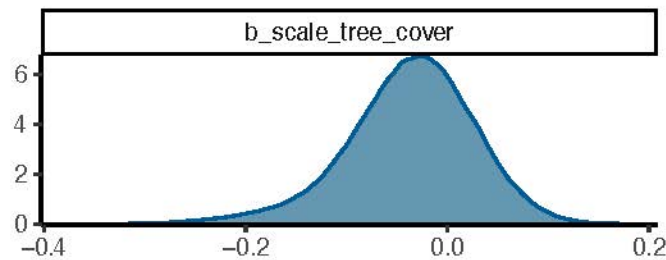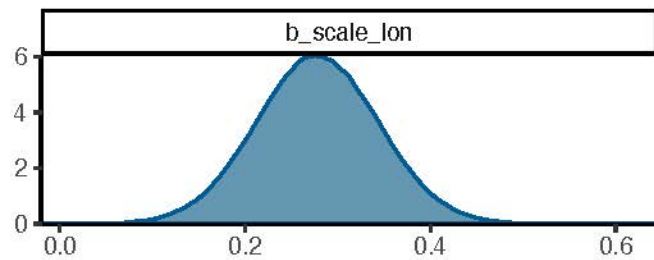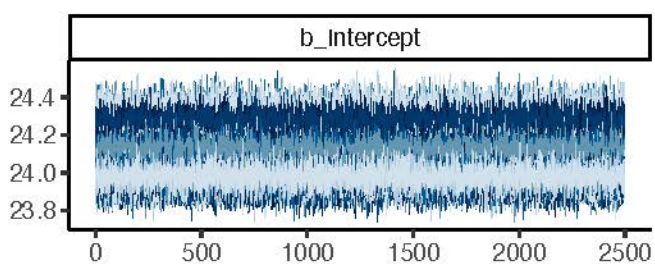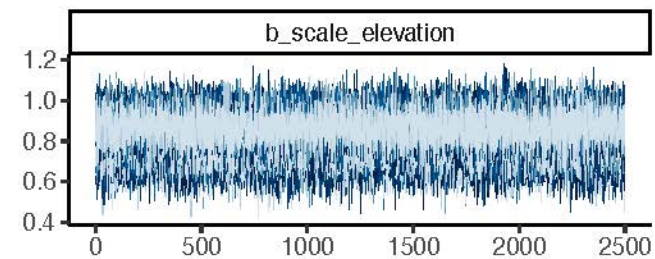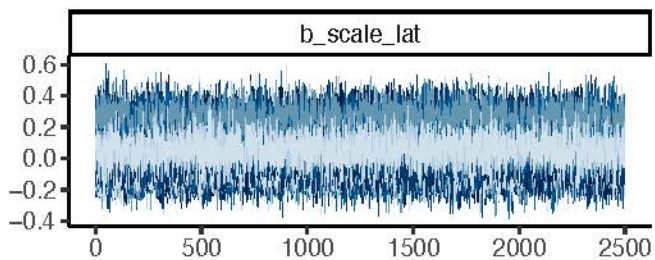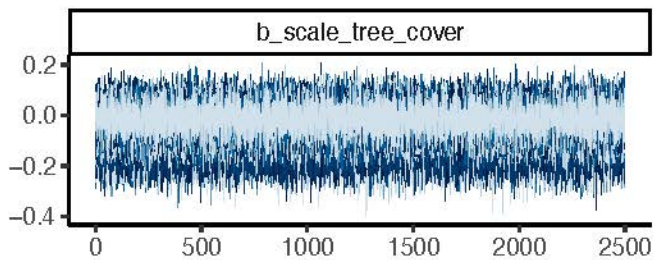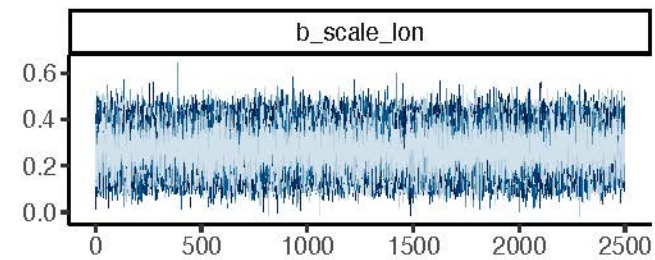



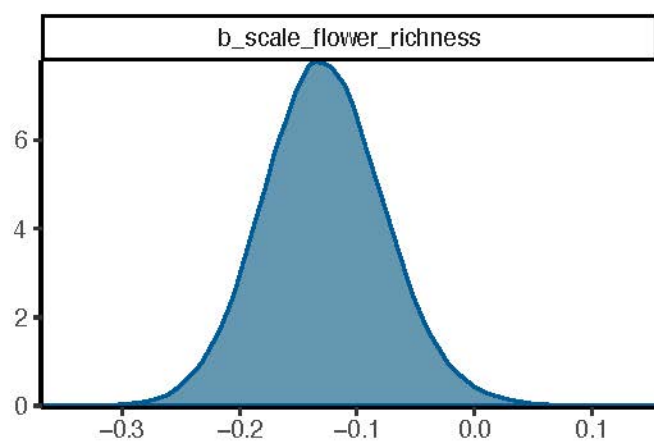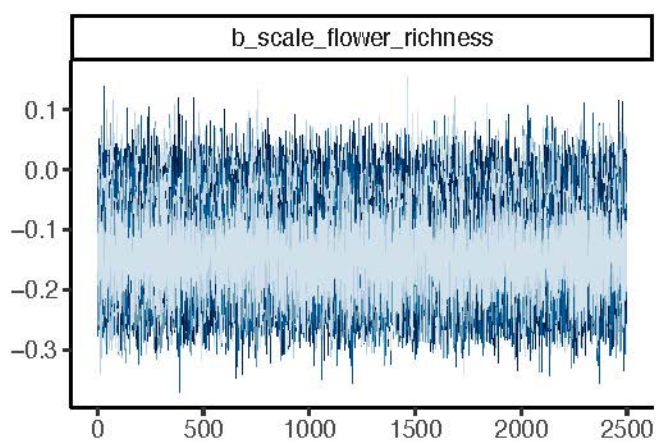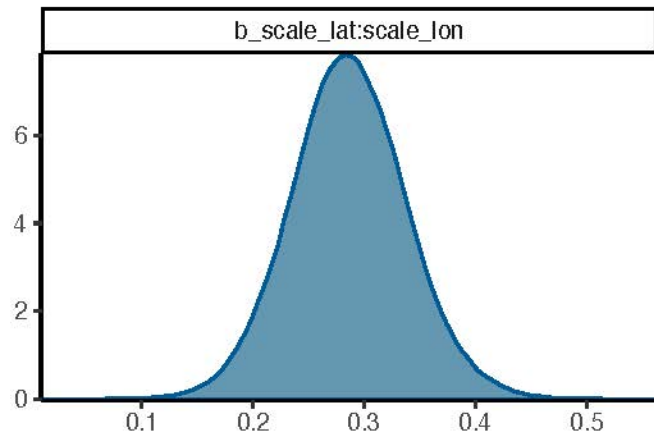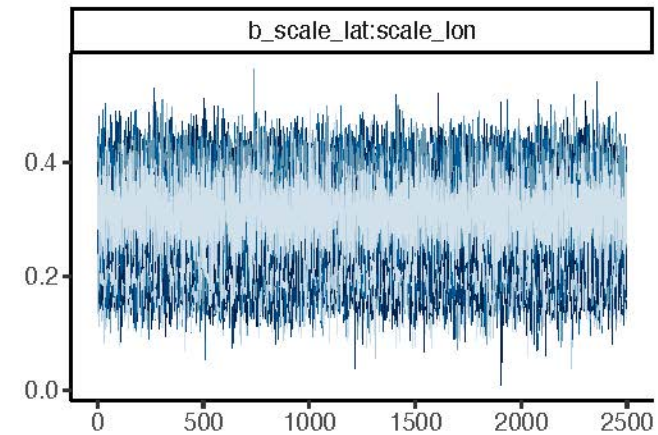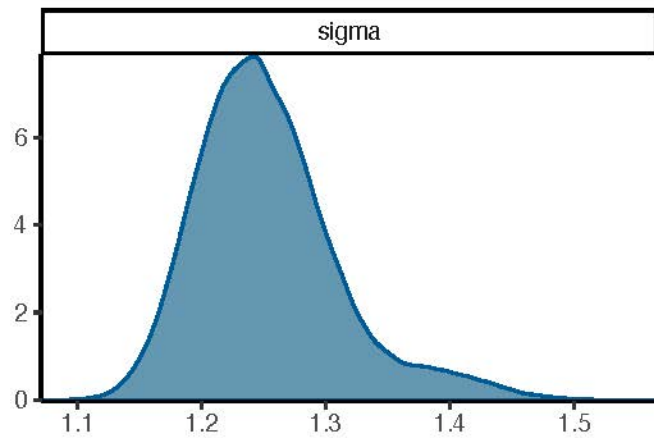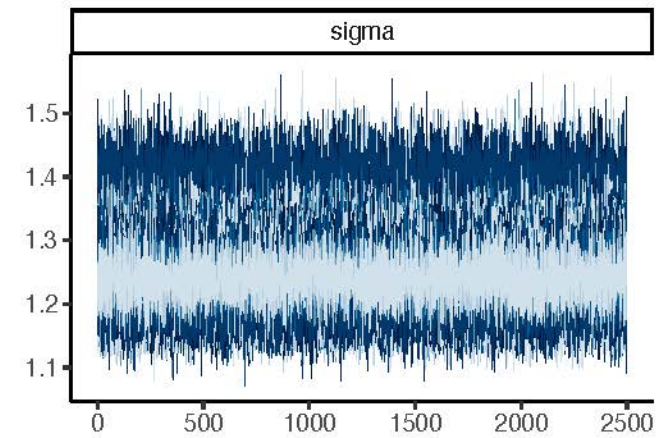

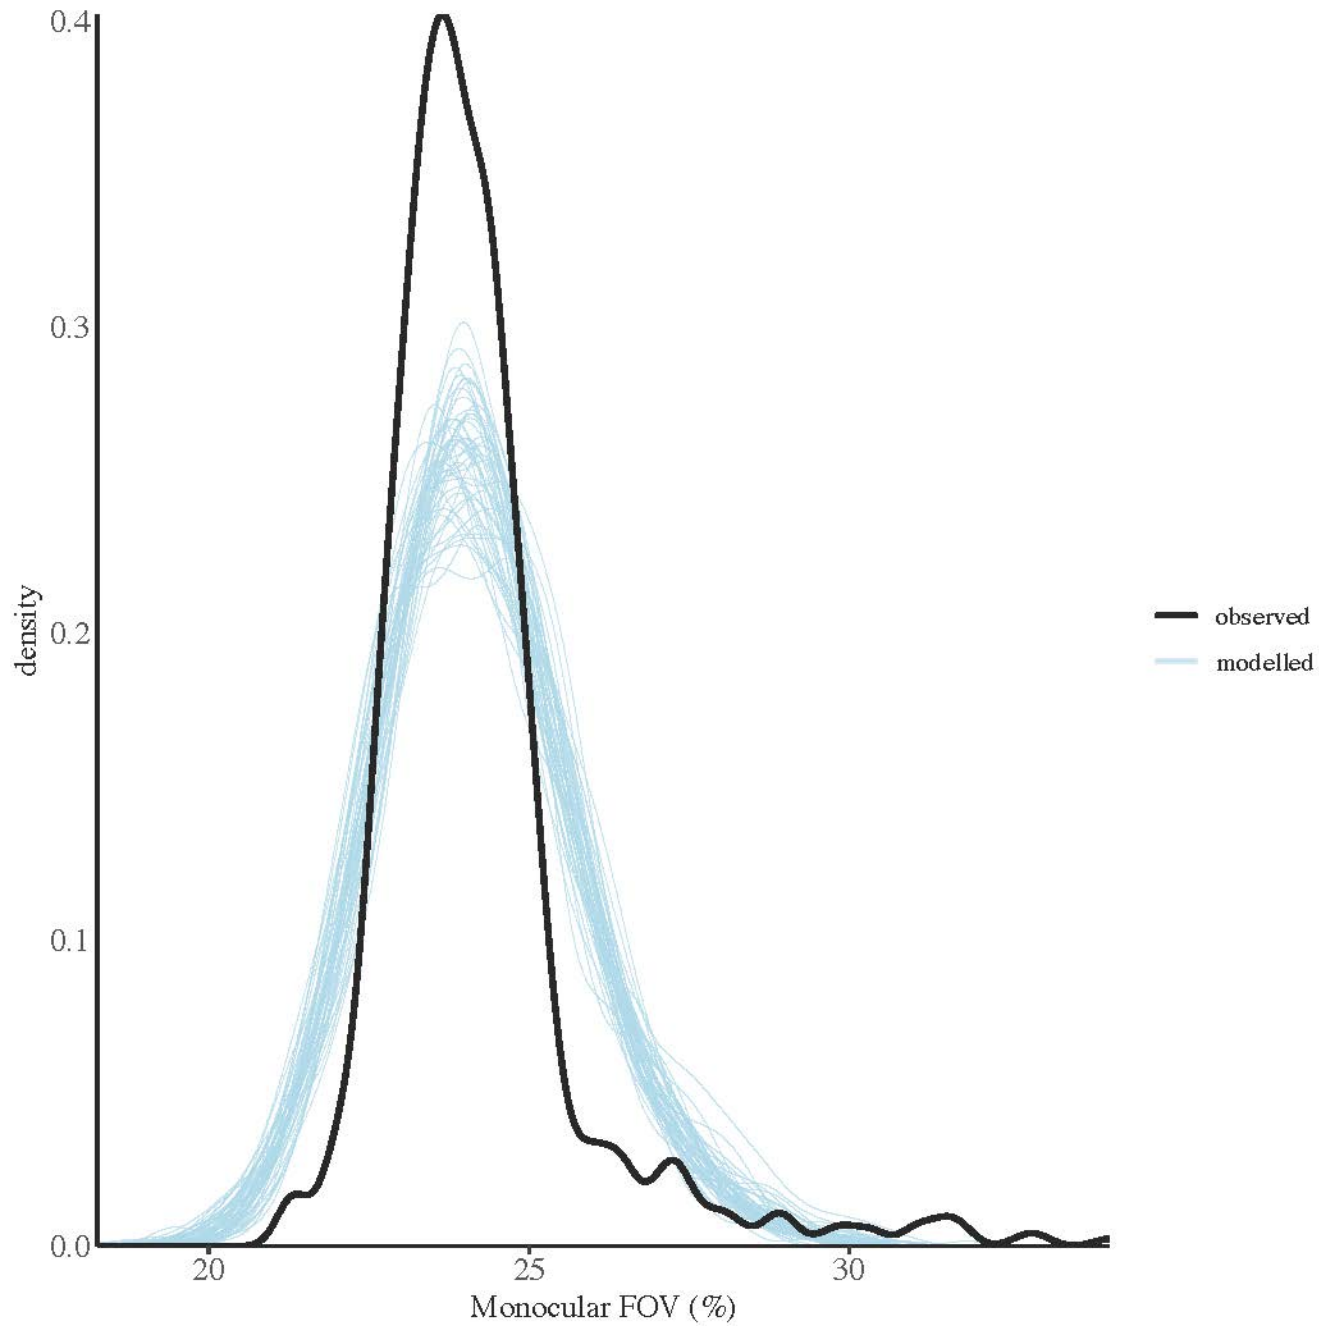



Binocular overlap (%)

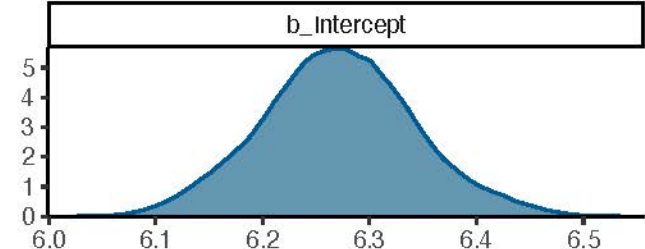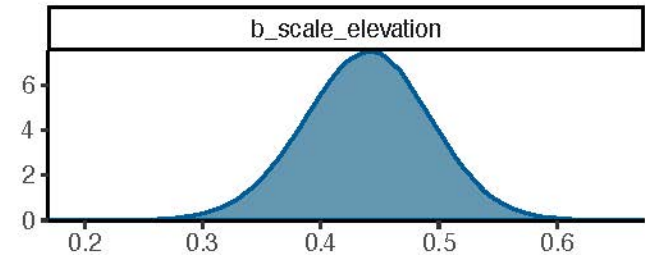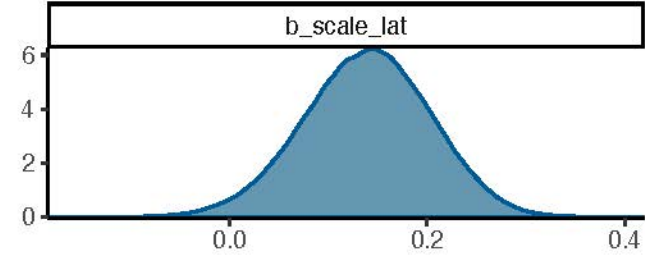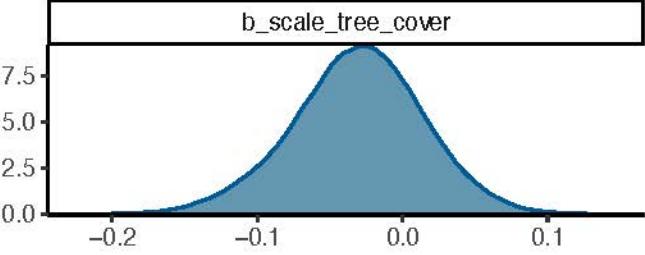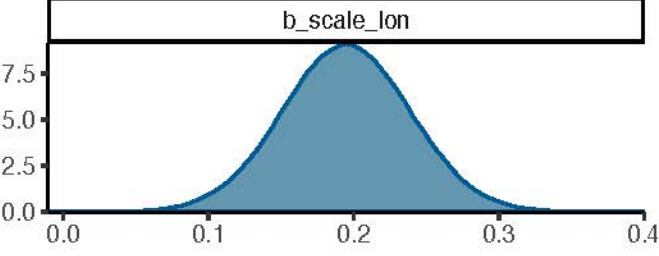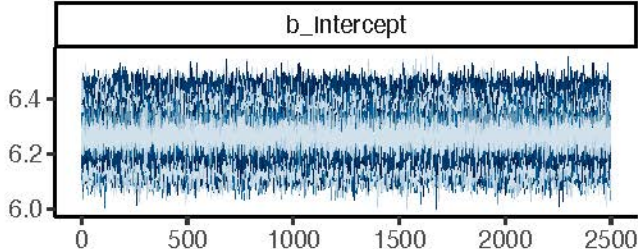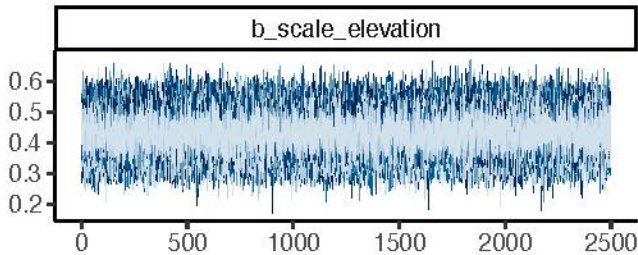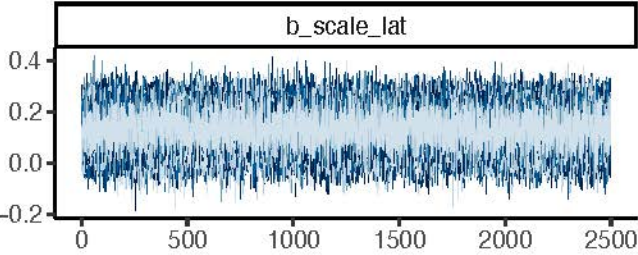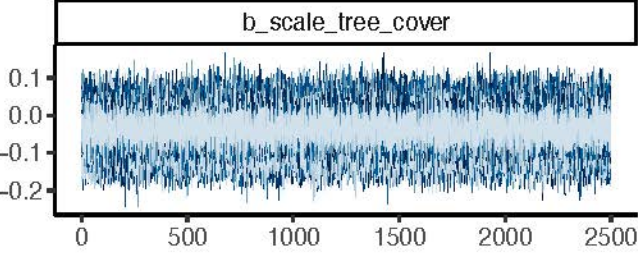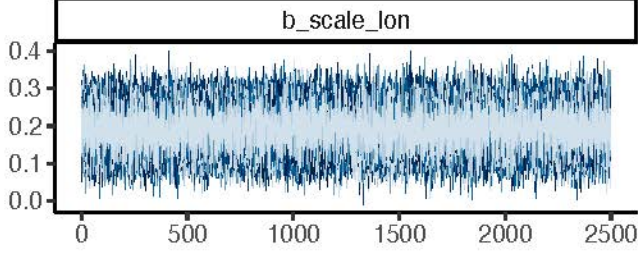

b\_scale\_flower\_richness

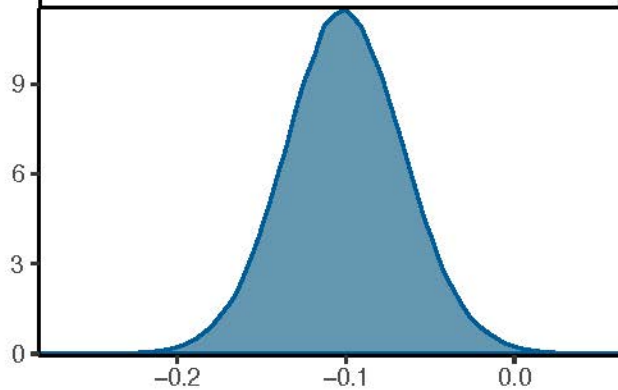

b\_scale\_flower\_richness

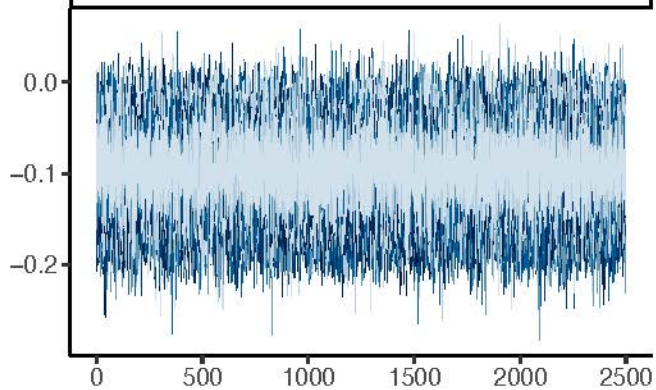

b\_scale\_lat:scale\_lon

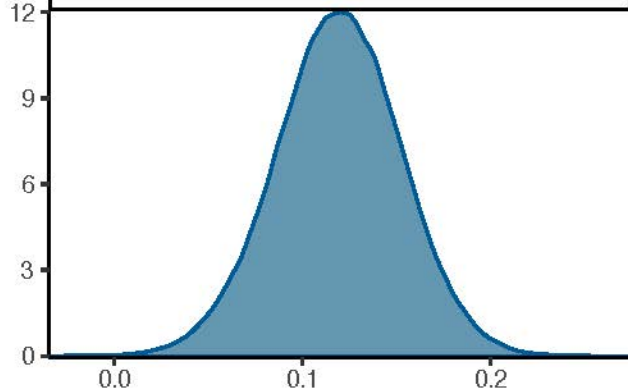

b\_scale\_lat:scale\_lon

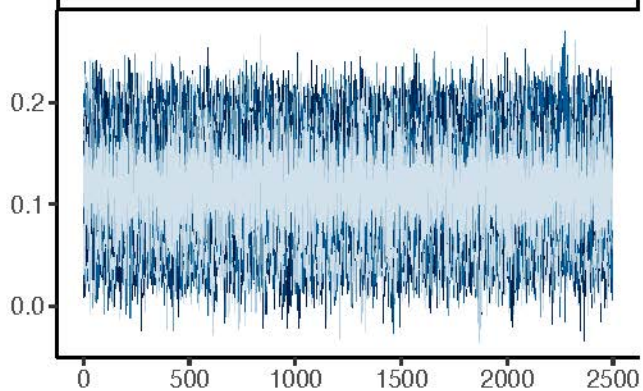

sigma

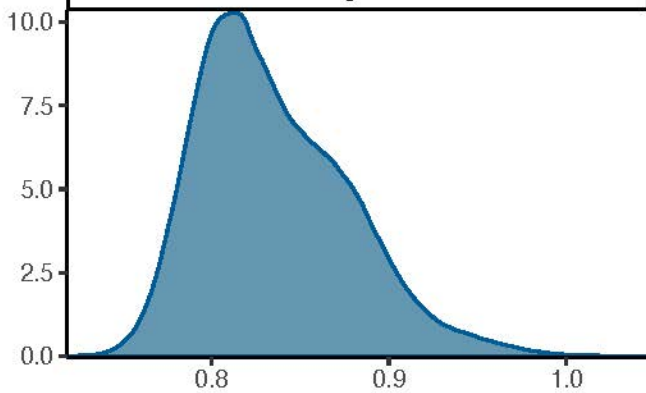

sigma

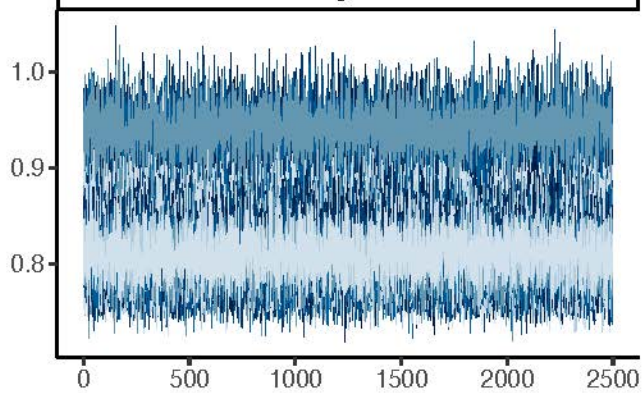

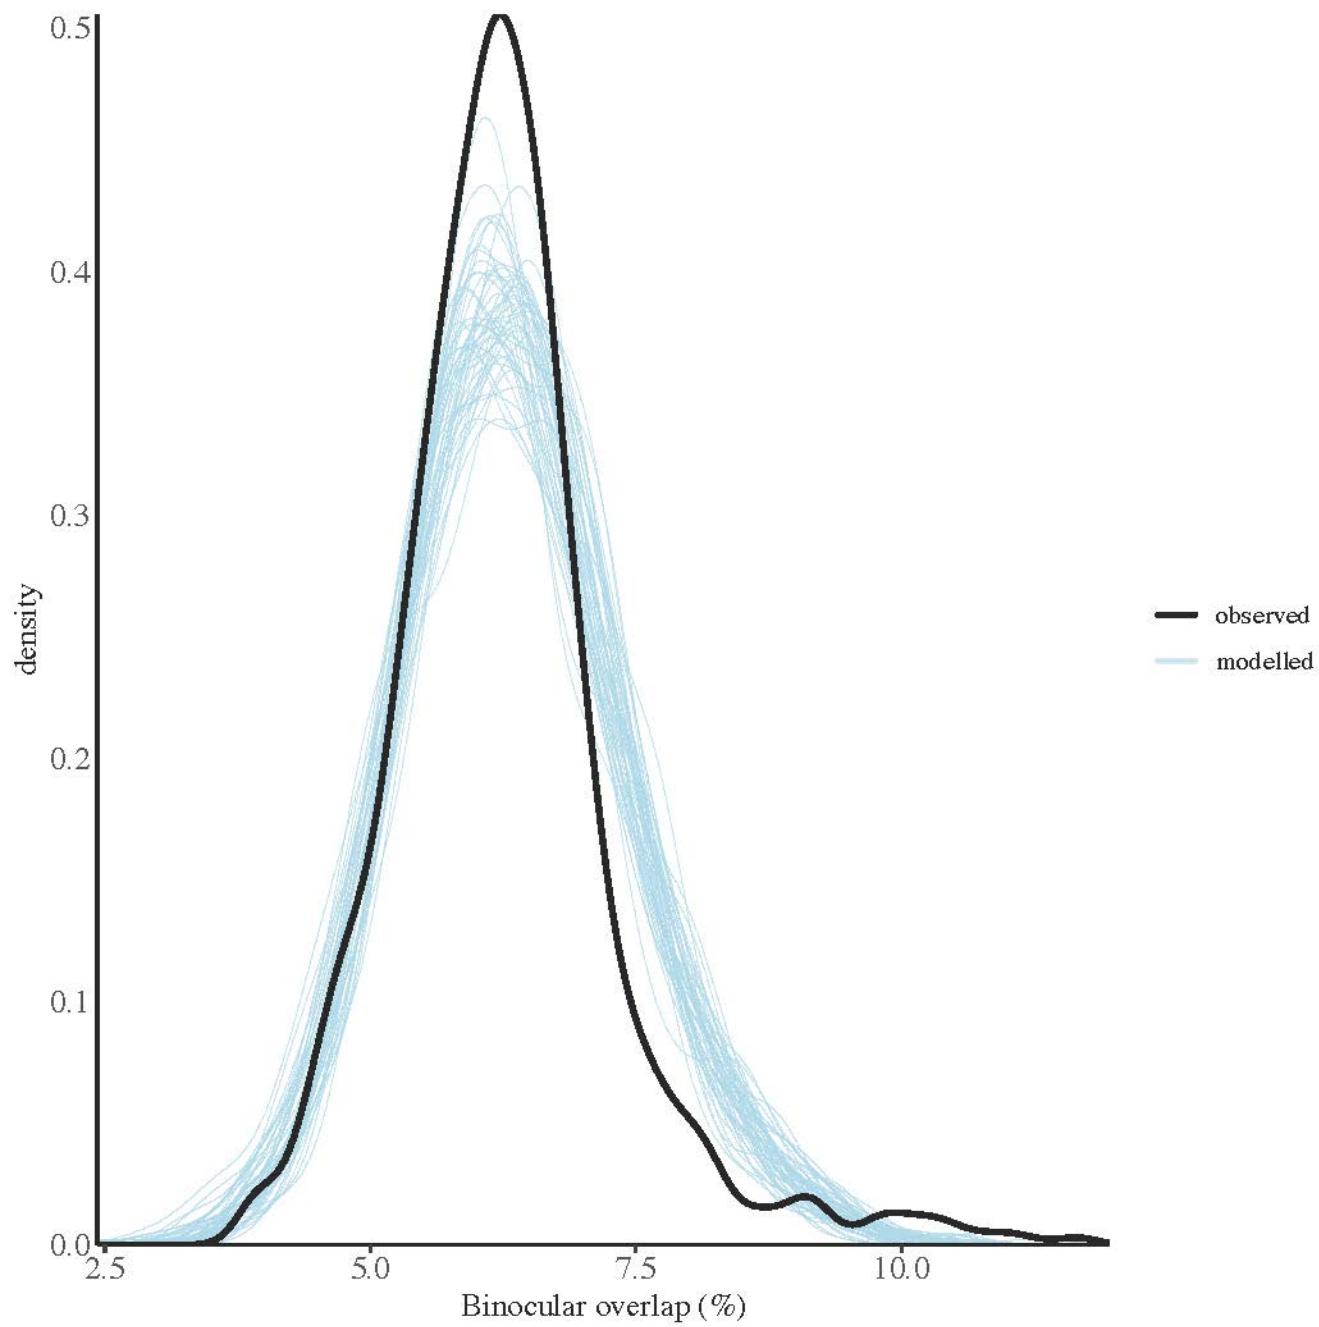

ITD (mm)

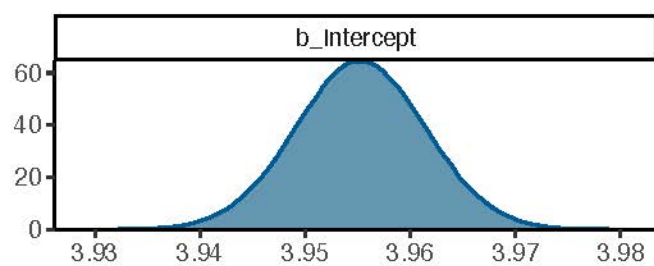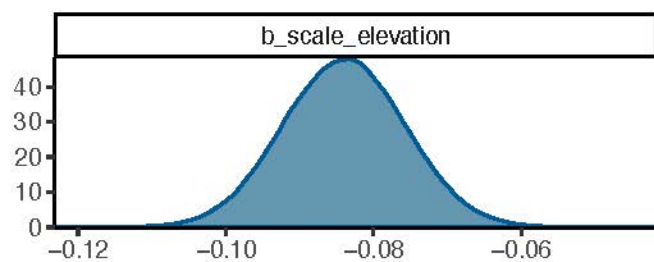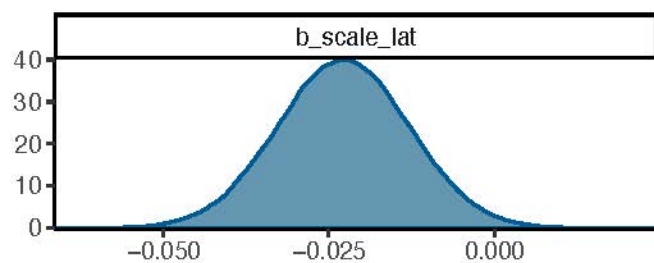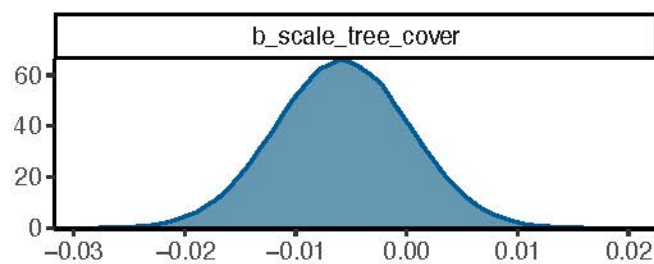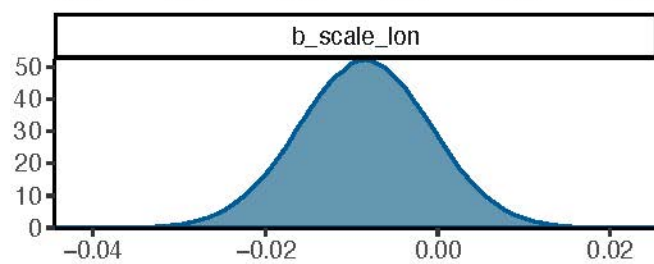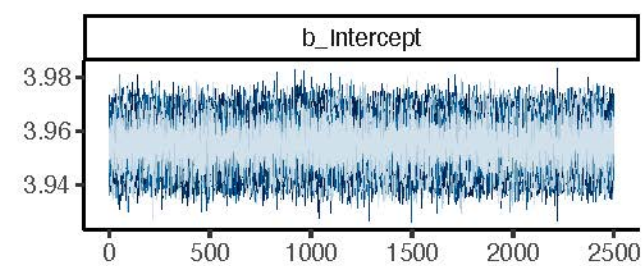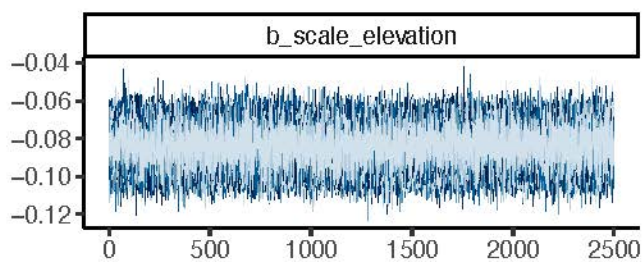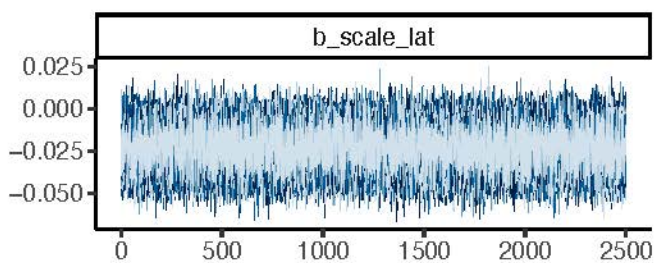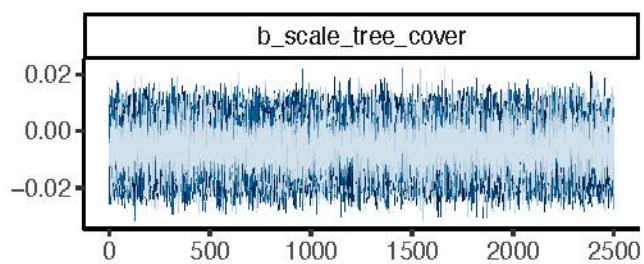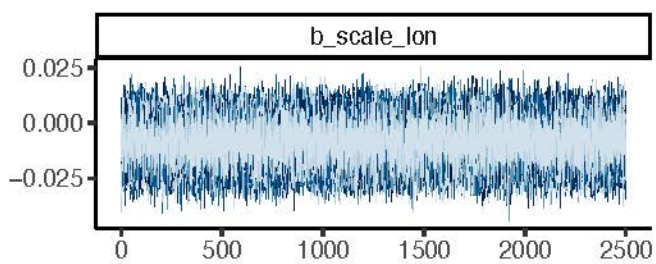



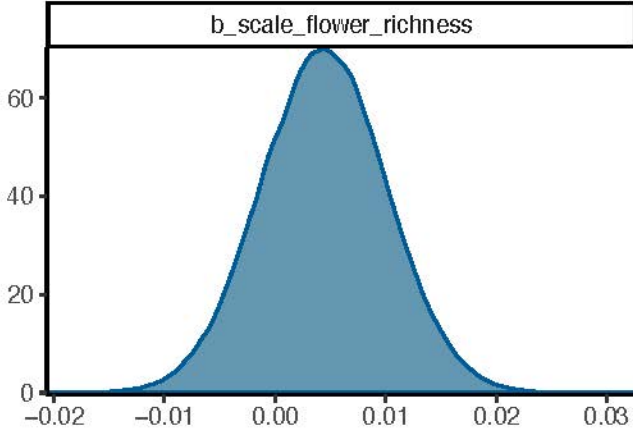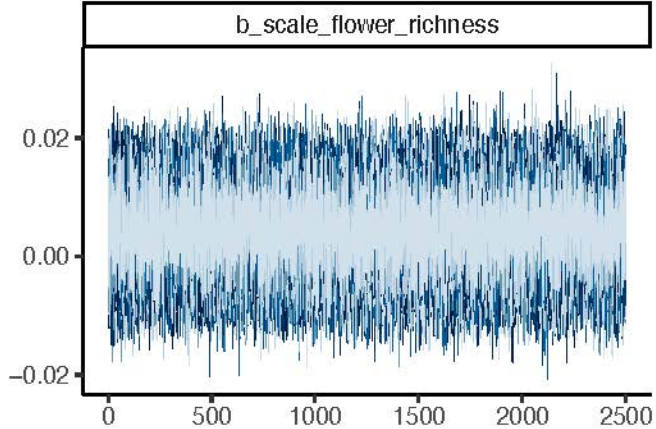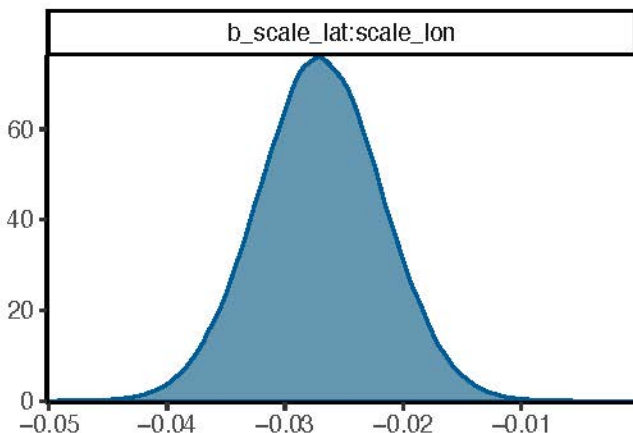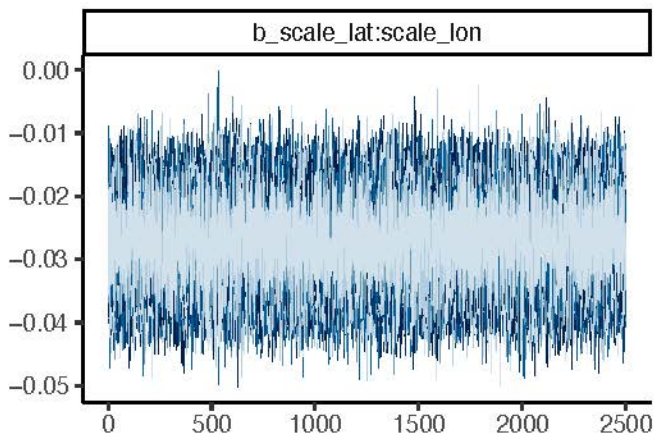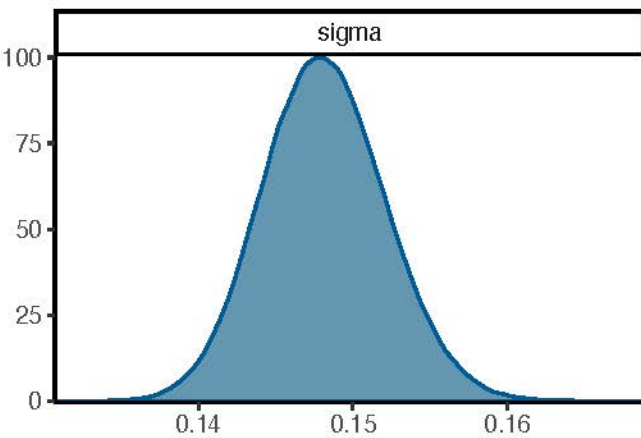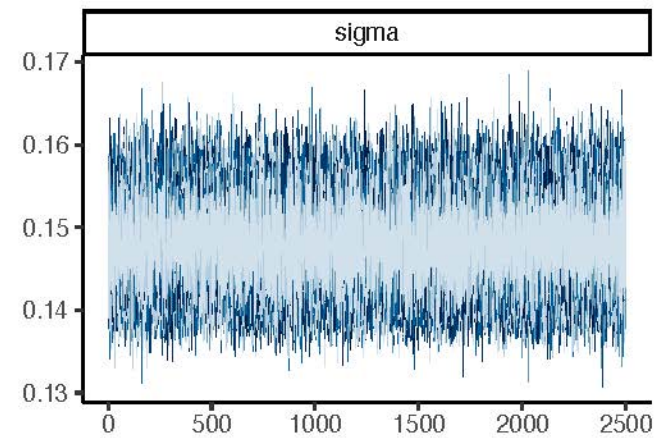



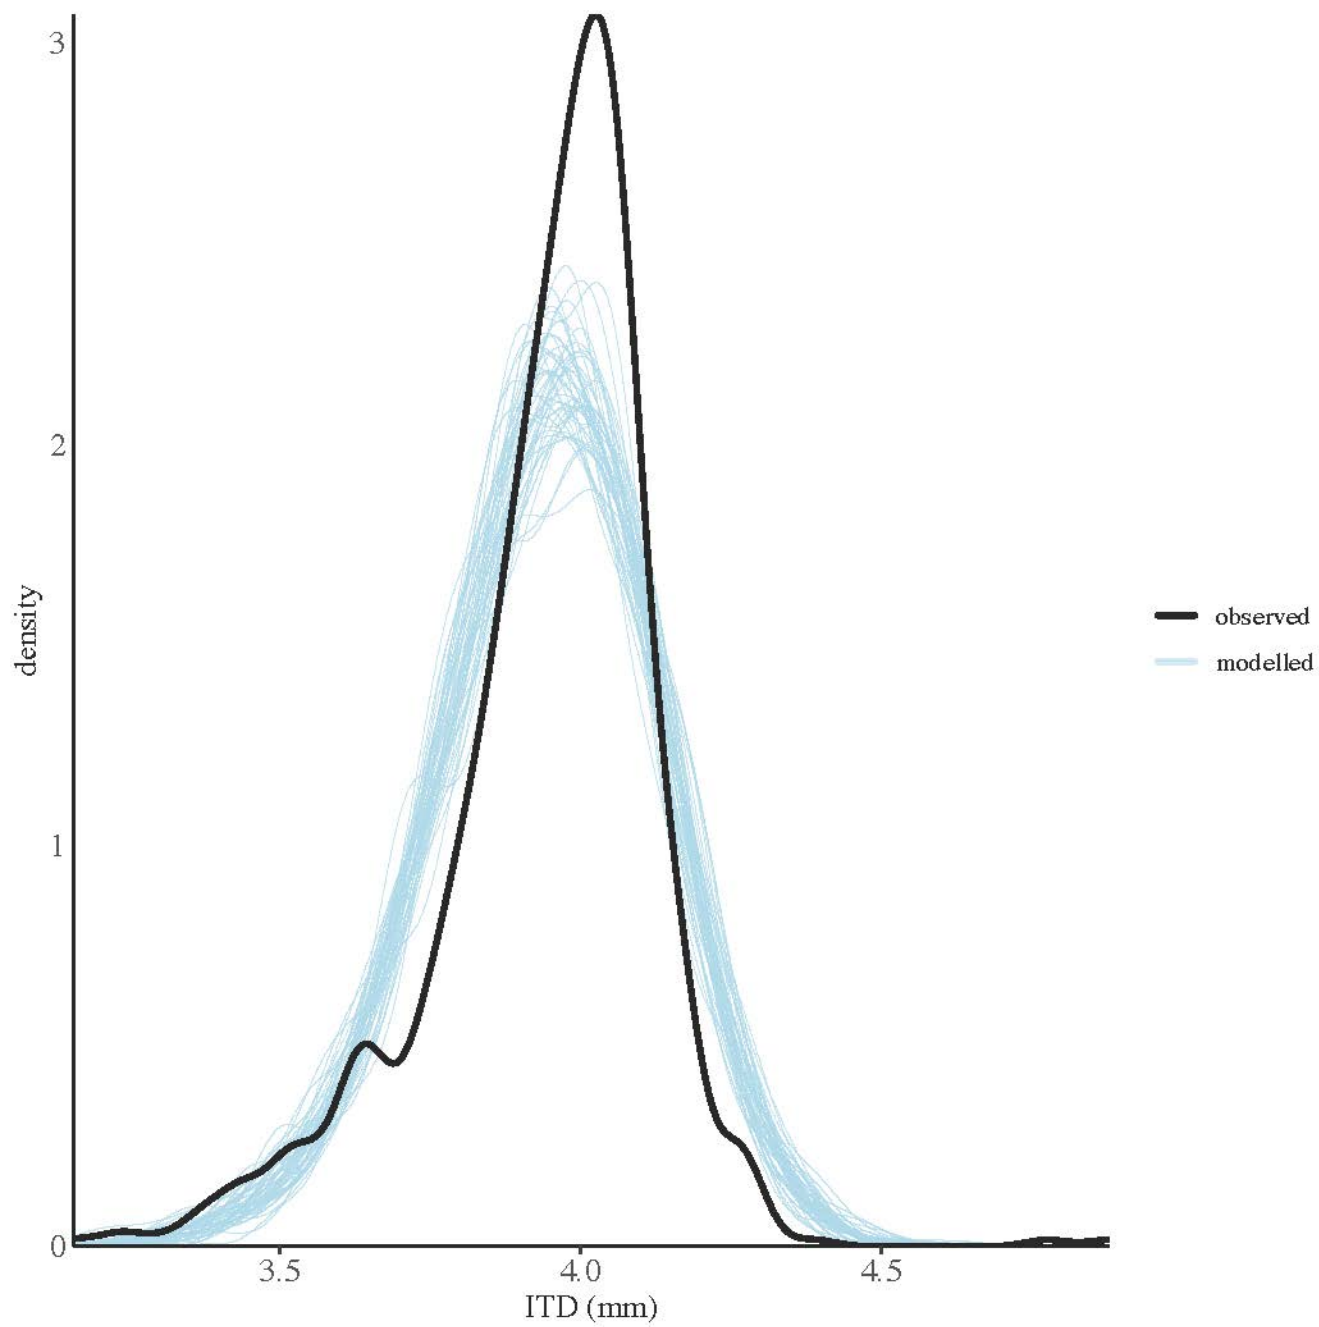

**Effects of tree cover on the observed number of bumblebee species in communities within grasslands across Sweden.** Model traces and posterior predictive check for each visual trait modelled with Bayesian inference.

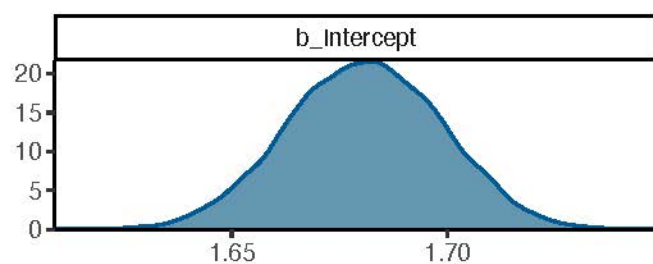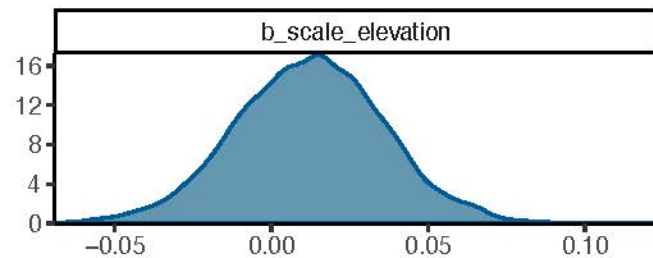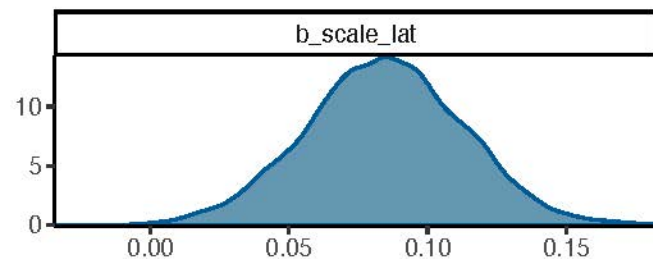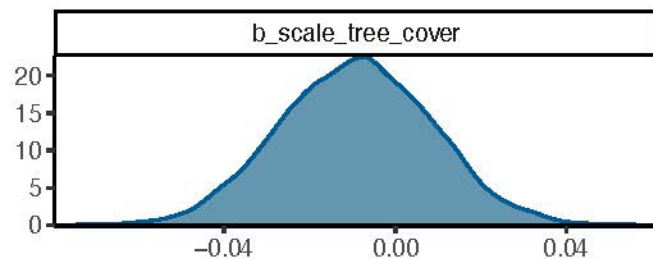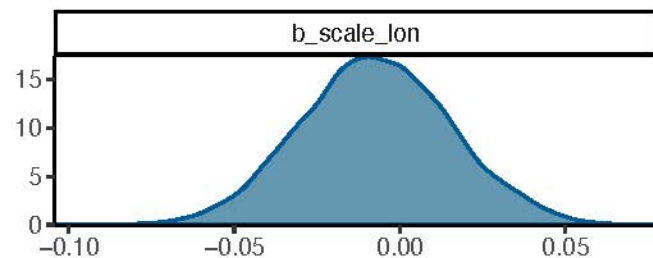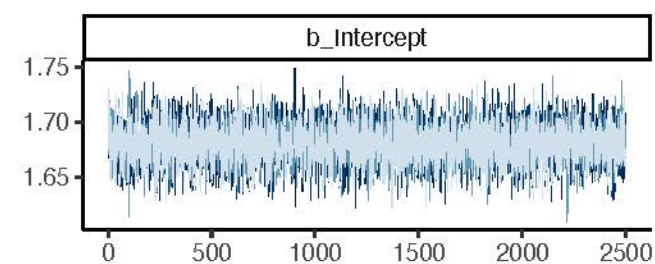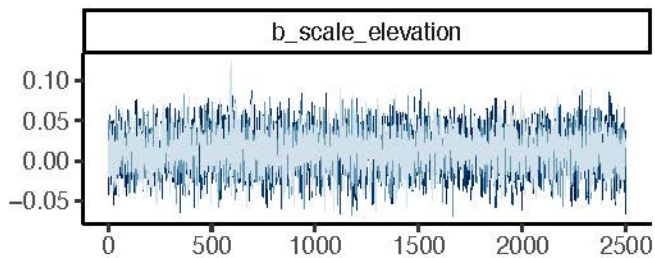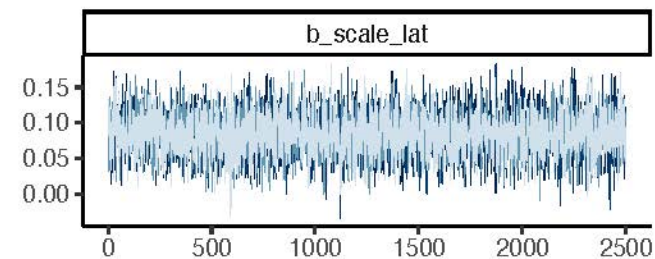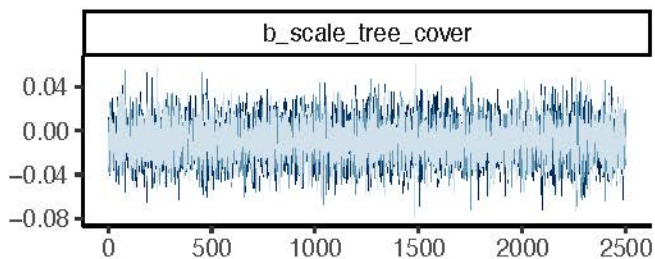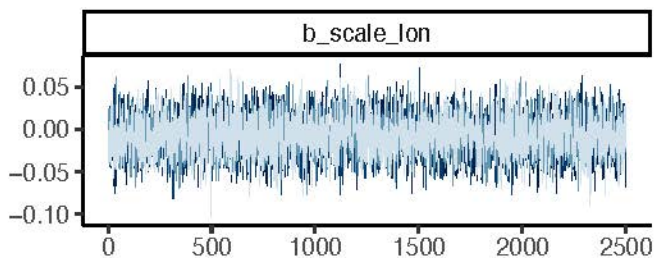

b\_scale\_flower\_richness

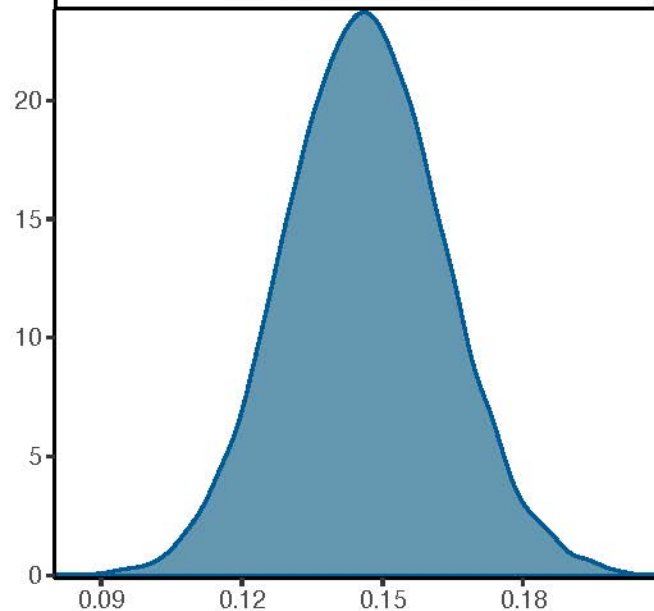

b\_scale\_flower\_richness

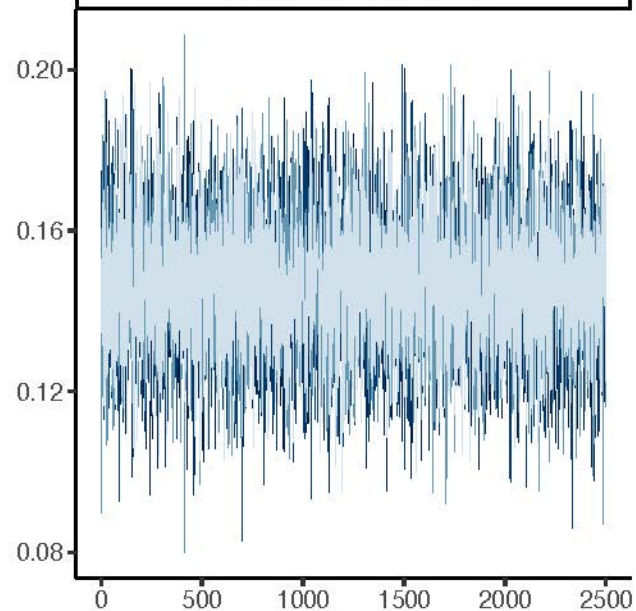

b\_scale\_lat:scale\_lon

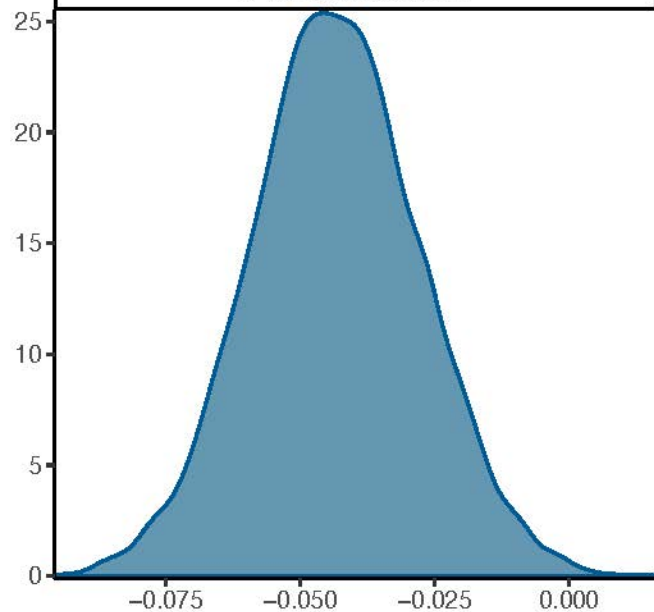

b\_scale\_lat:scale\_lon

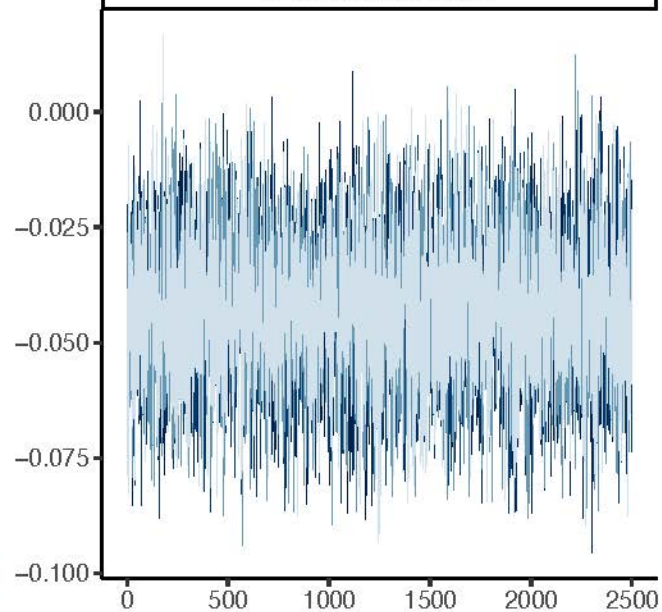

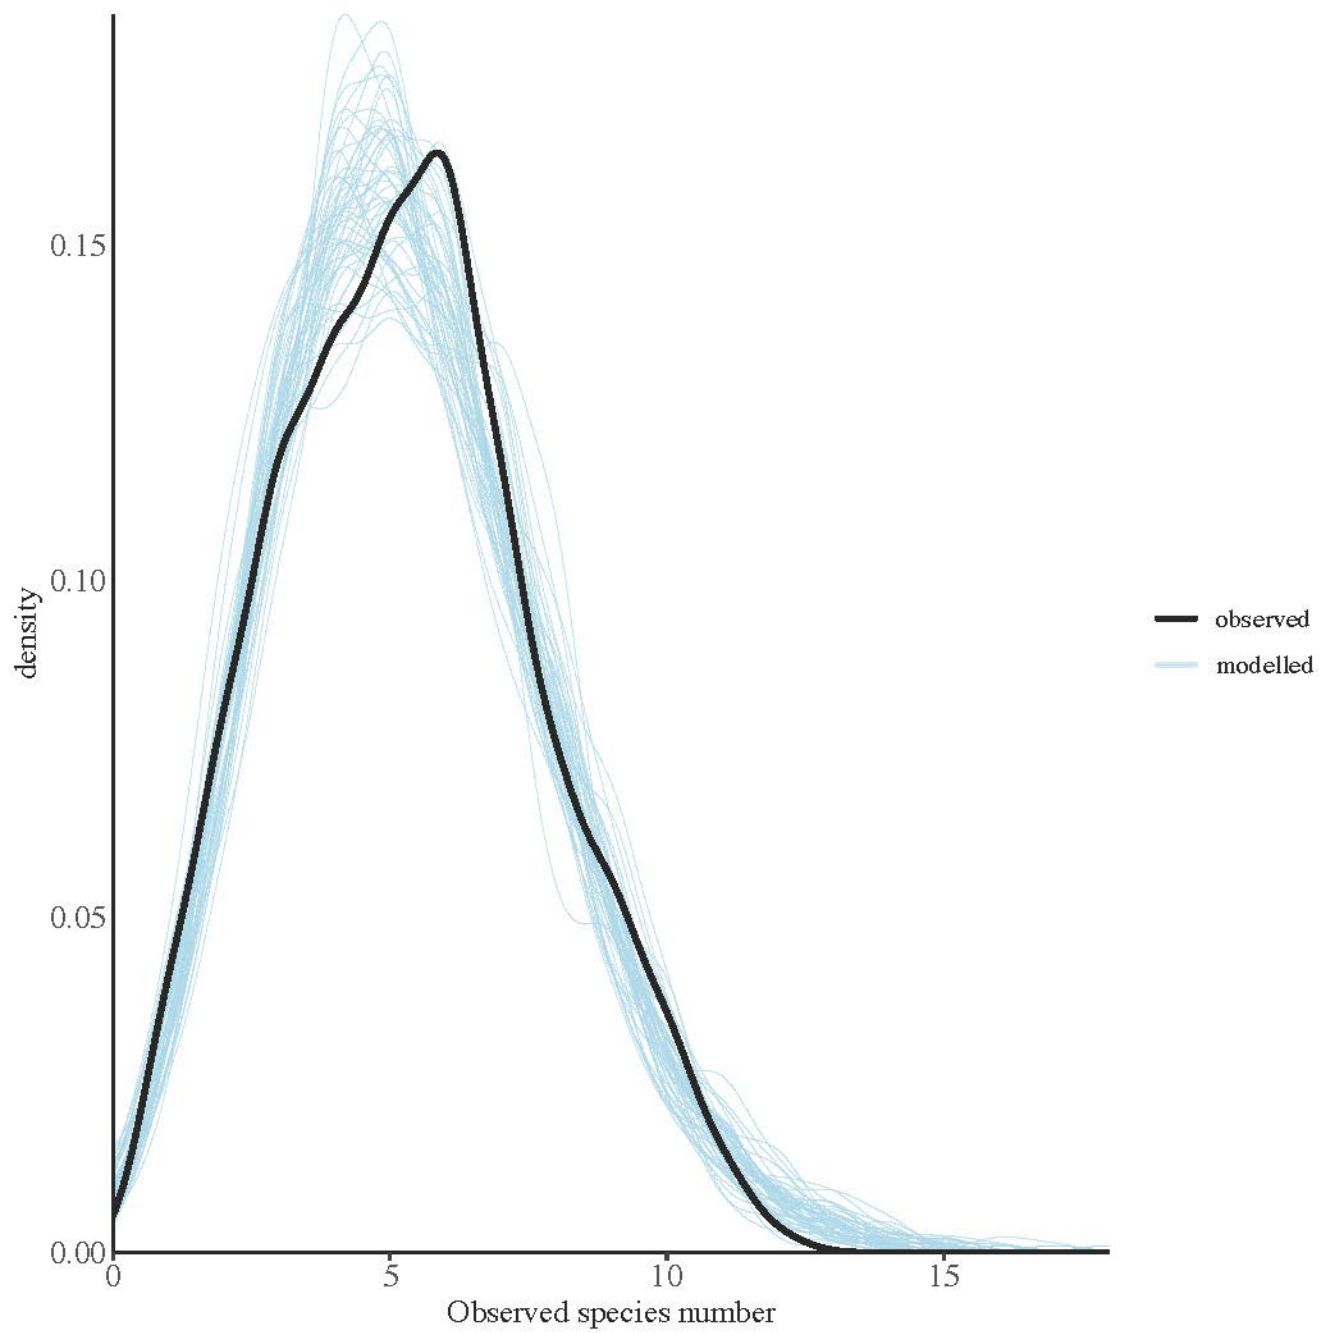

**Effects of tree cover on the abundance of the twelve most common species in communities within grasslands across Sweden.** Model traces and posterior predictive check for each visual trait modelled with Bayesian inference.

ruđerariu



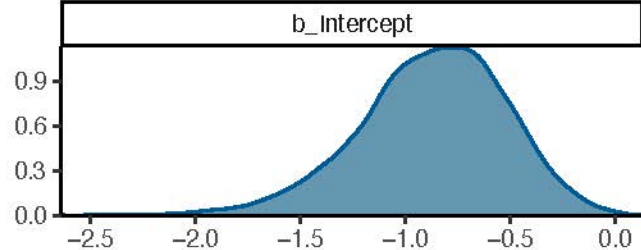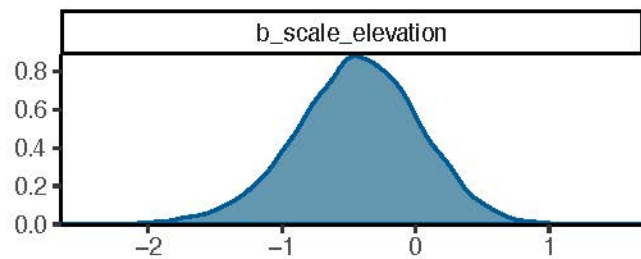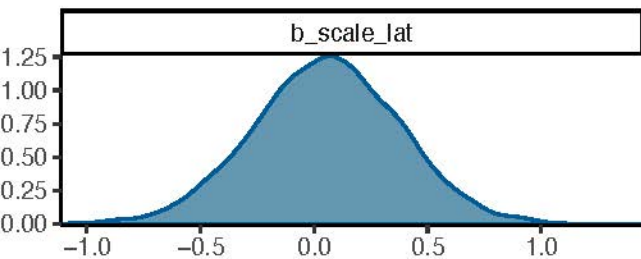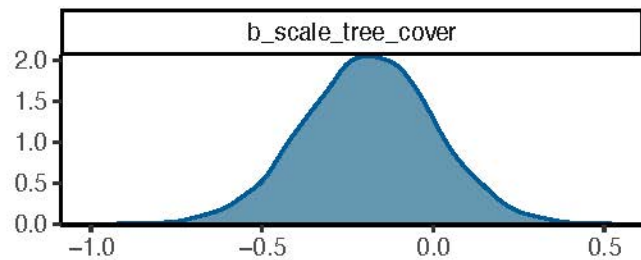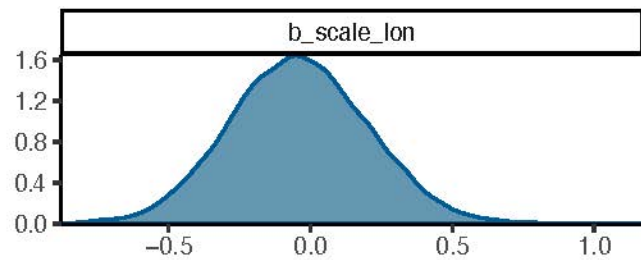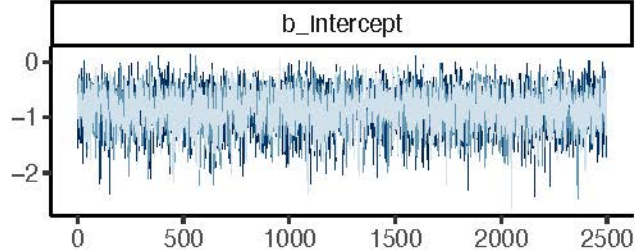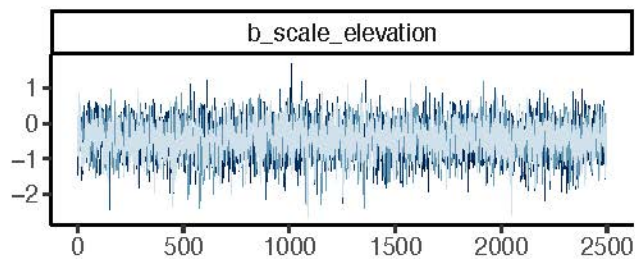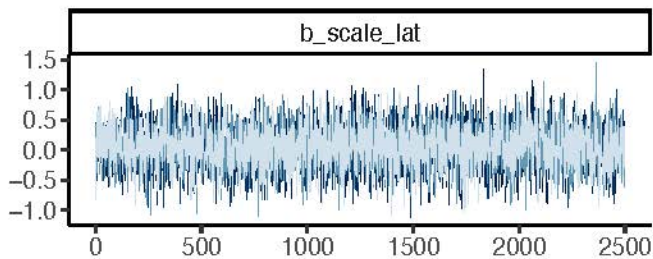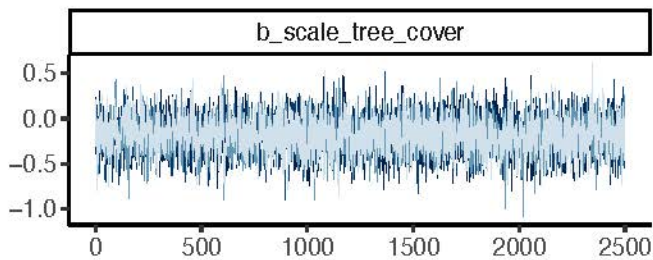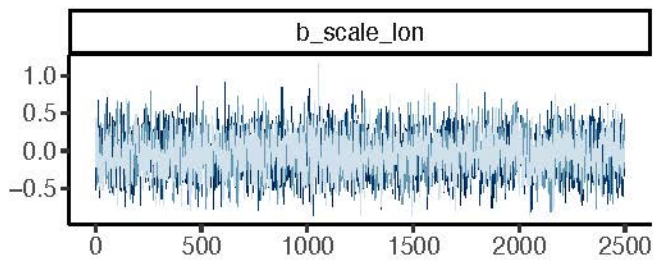

b\_scale\_flower\_richness

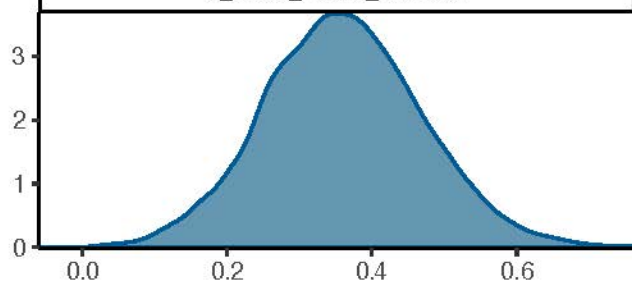

b\_scale\_flower\_richness

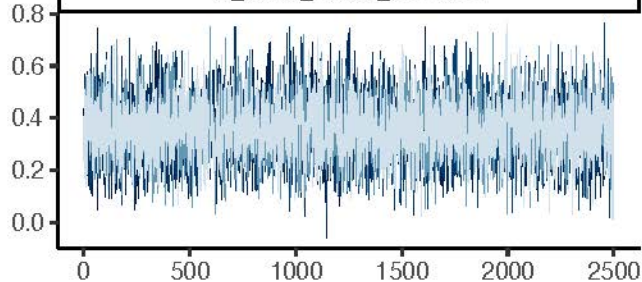

b\_scale\_lat:scale\_lon

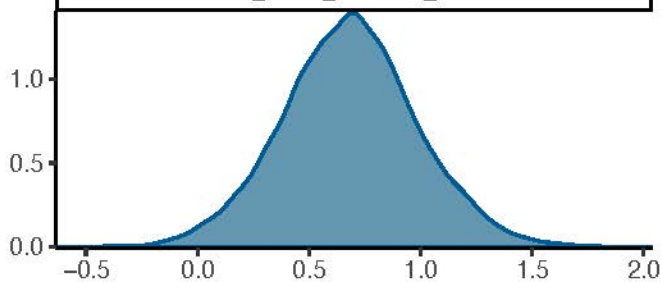

b\_scale\_lat:scale\_lon

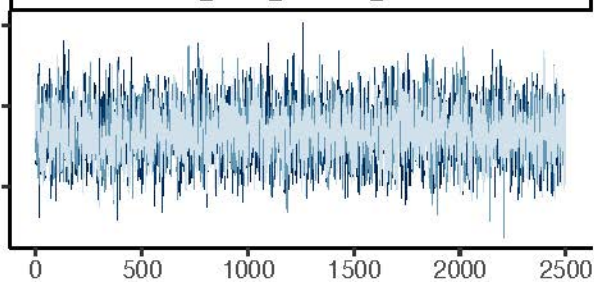

sd\_Abo\_\_Intercept

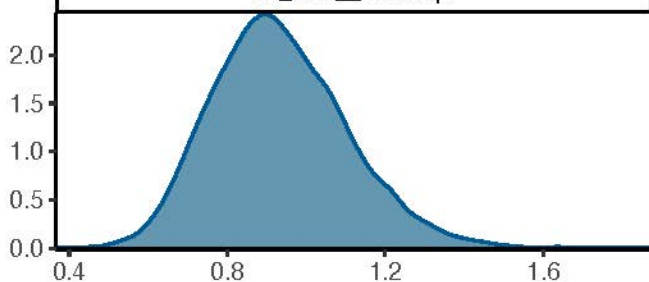

sd\_Abo\_\_Intercept

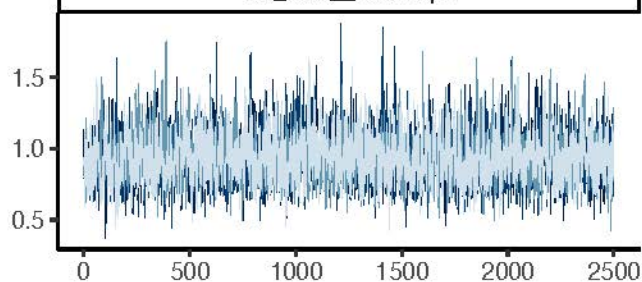

hu

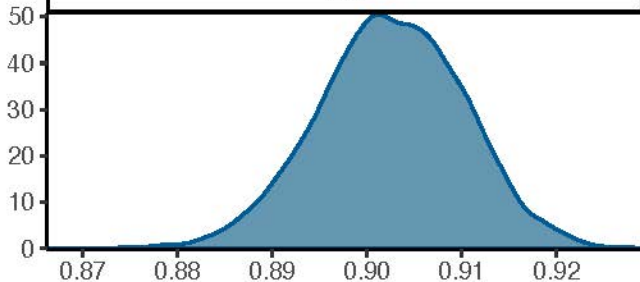

hu

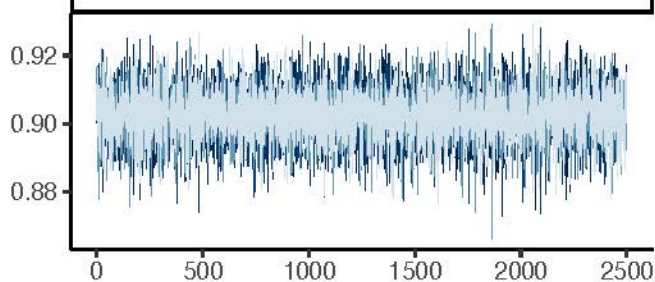

*runderariu*

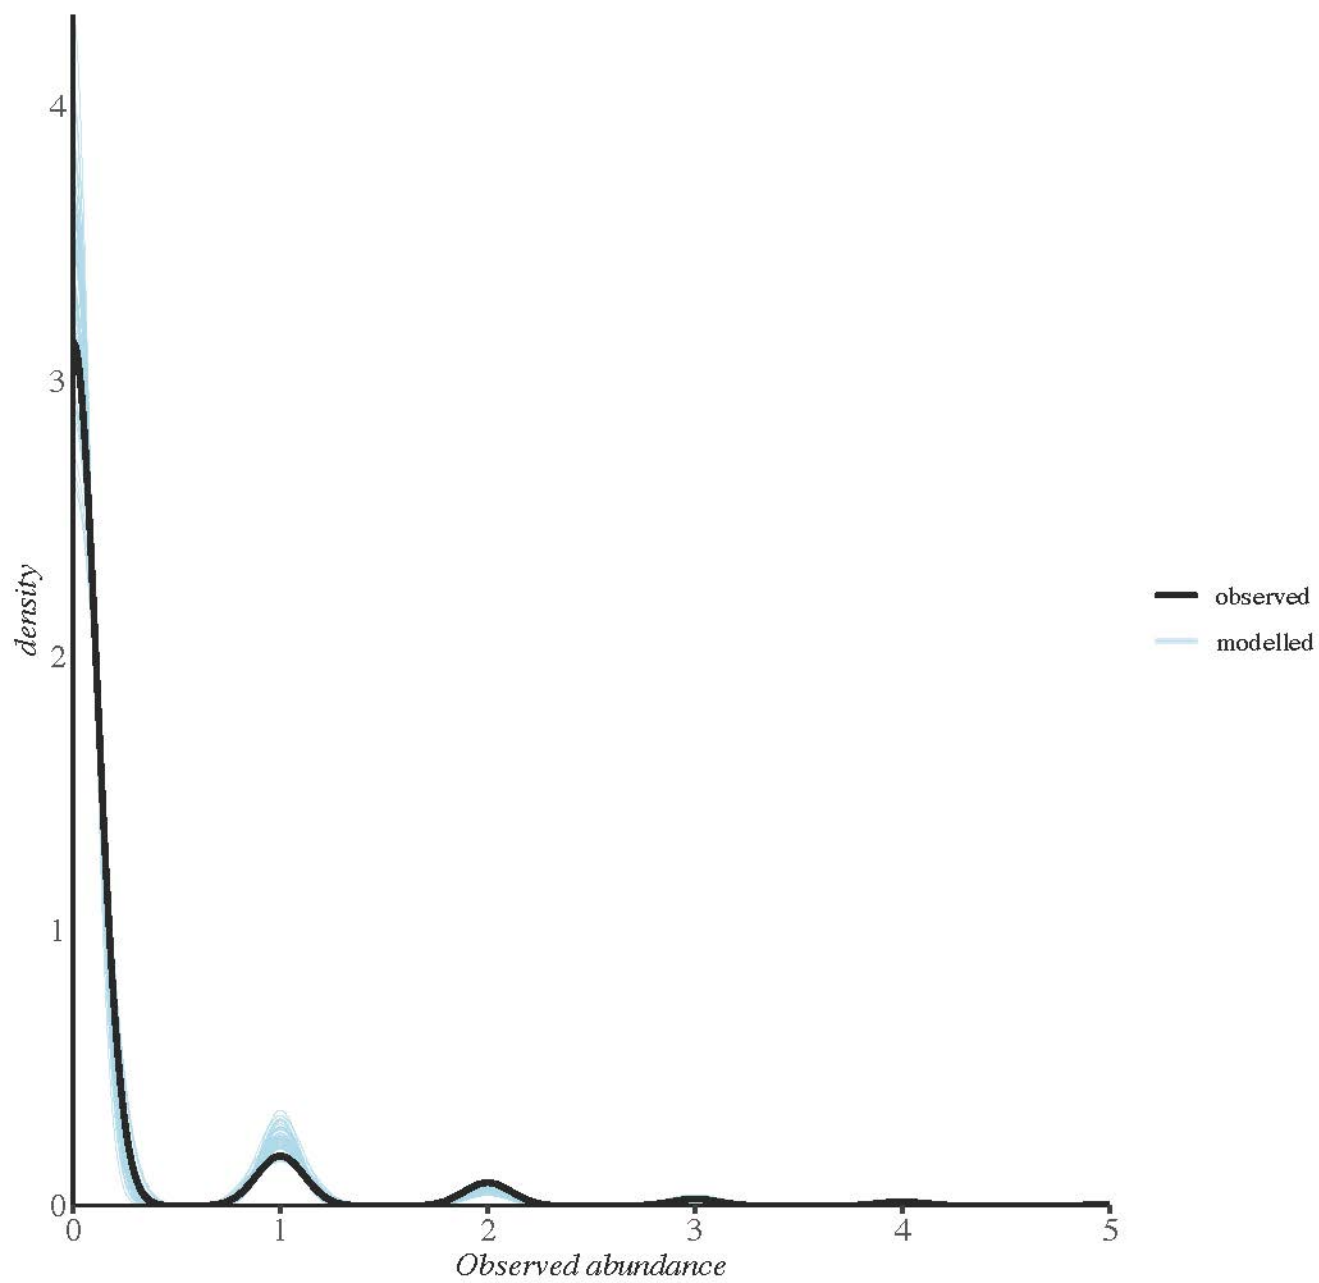

sporadicu

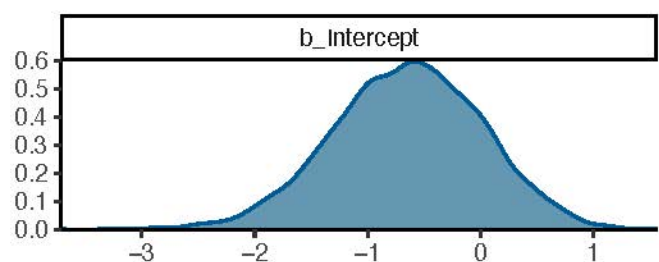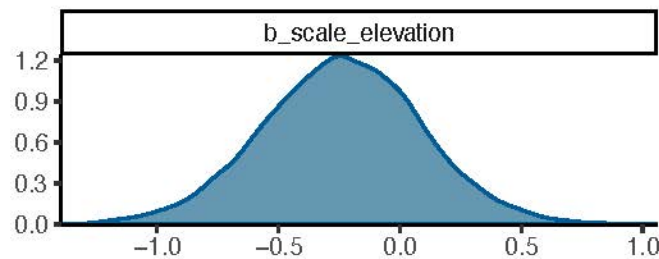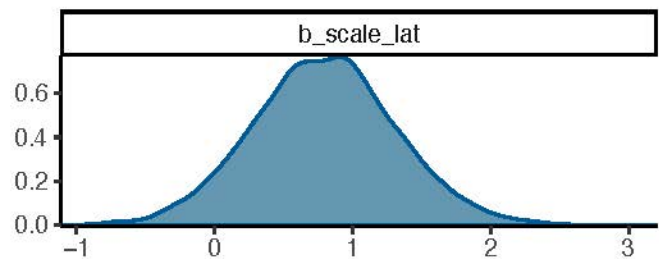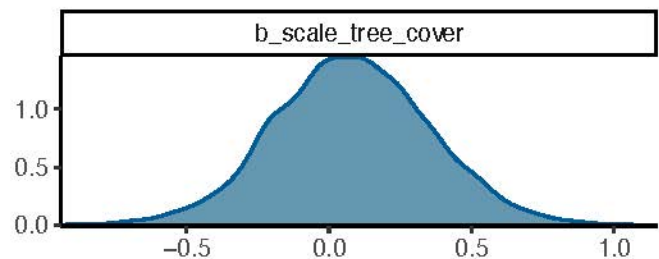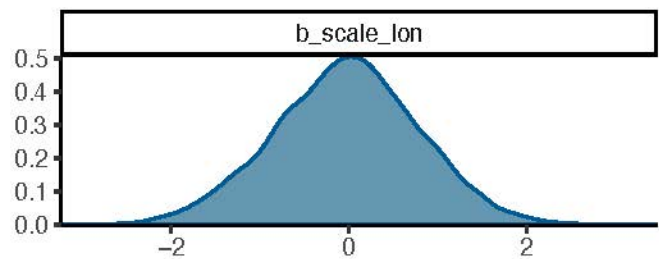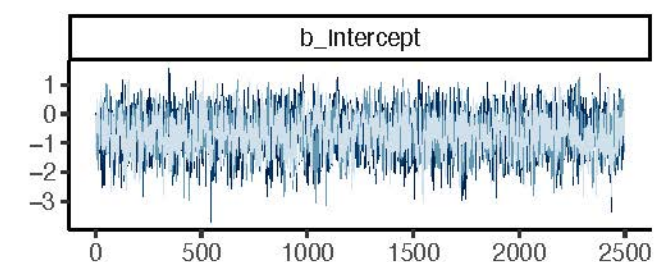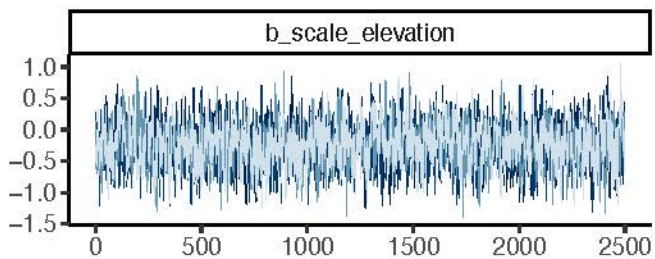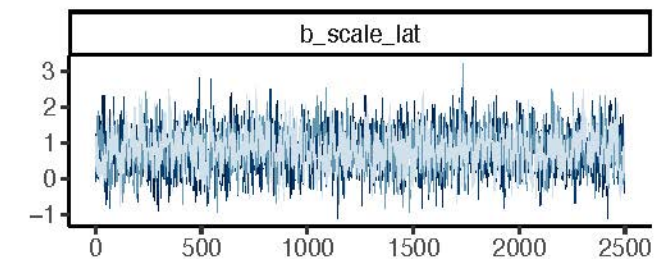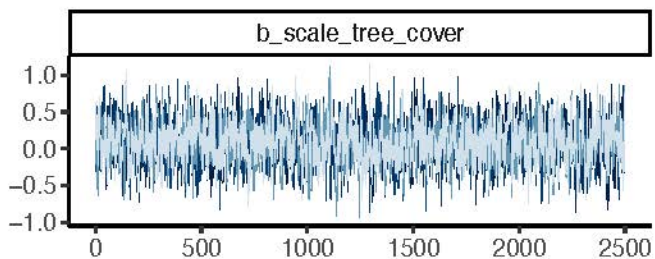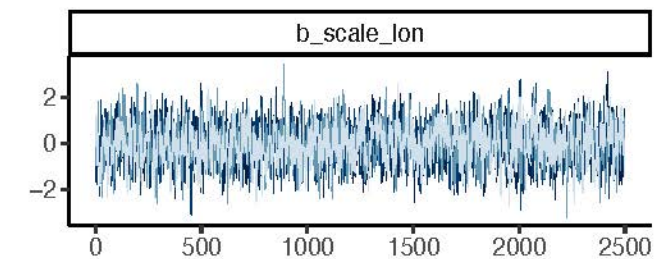



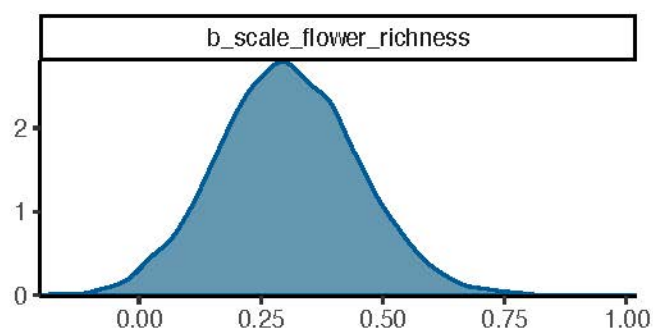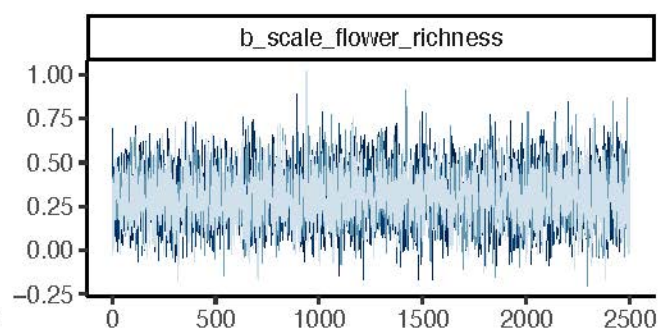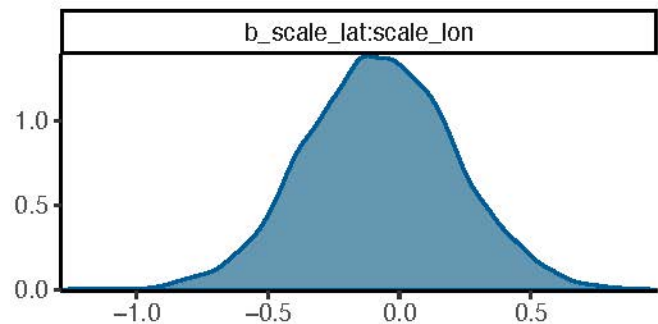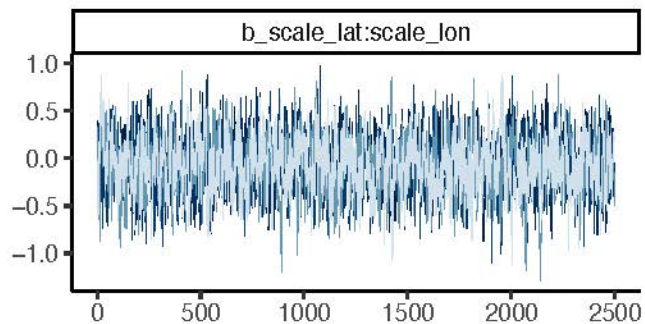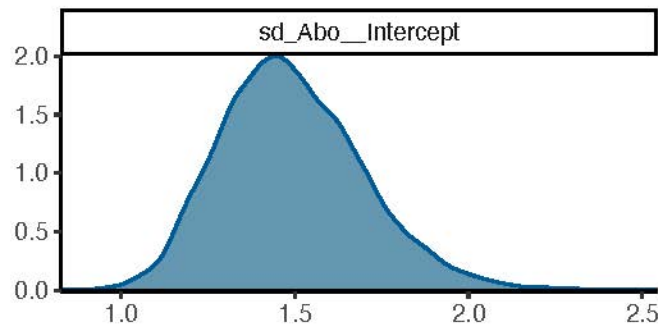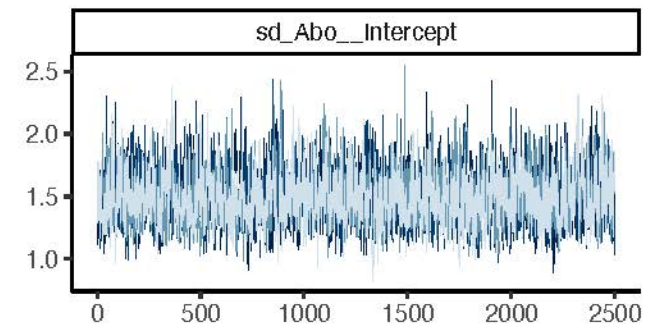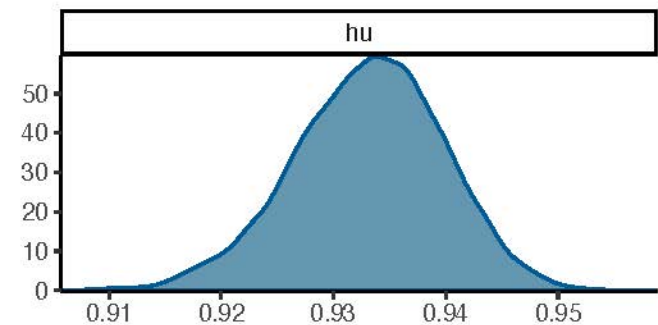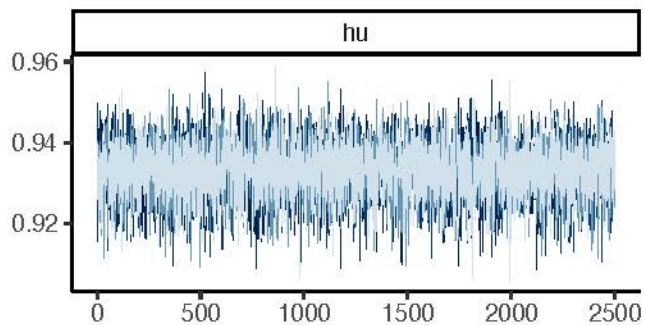

*sporadicu*

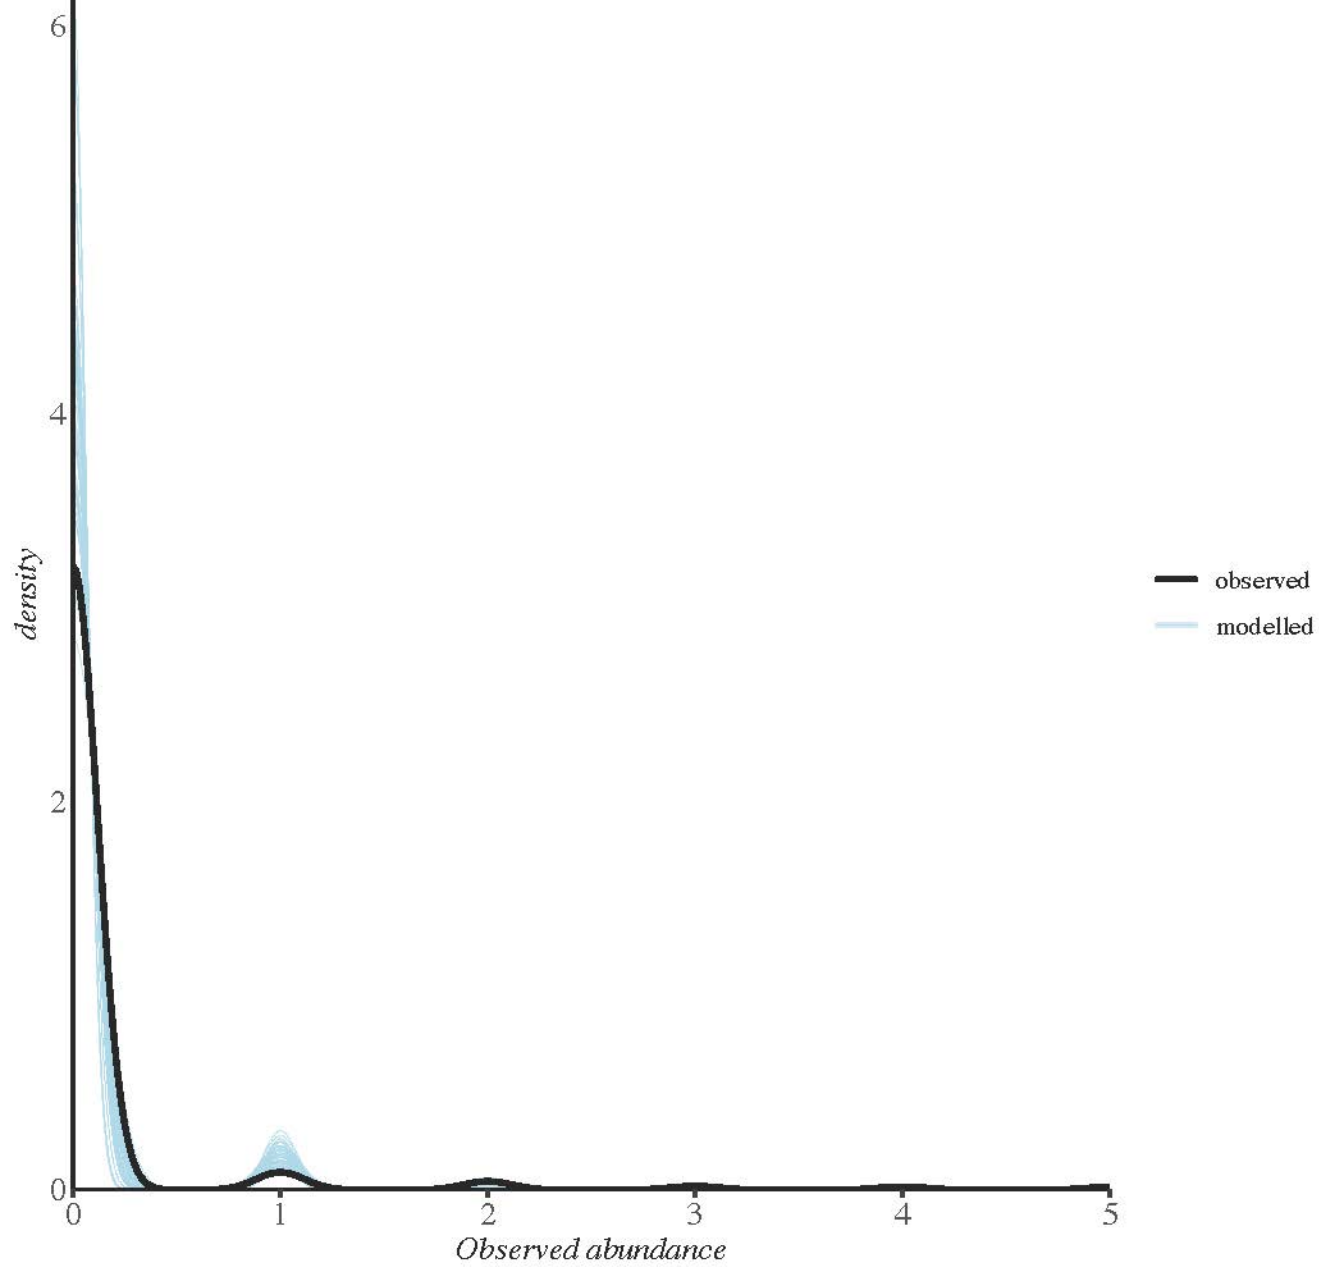



hortorum

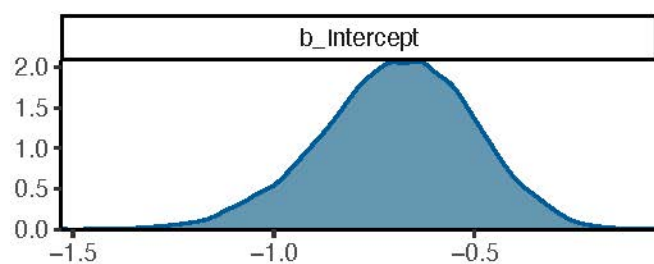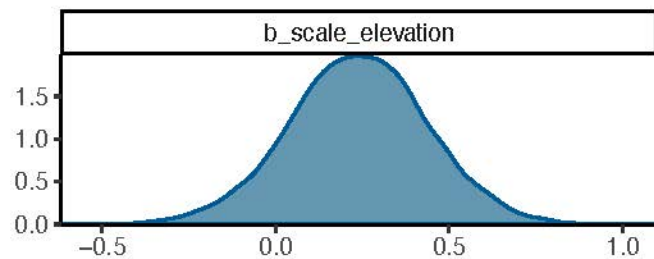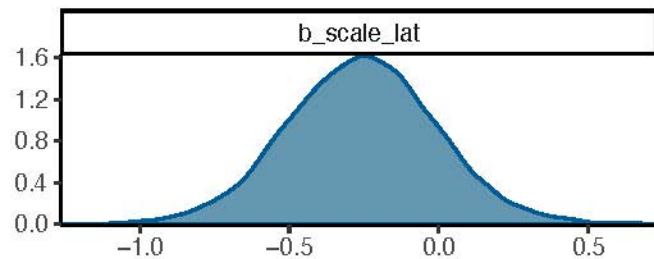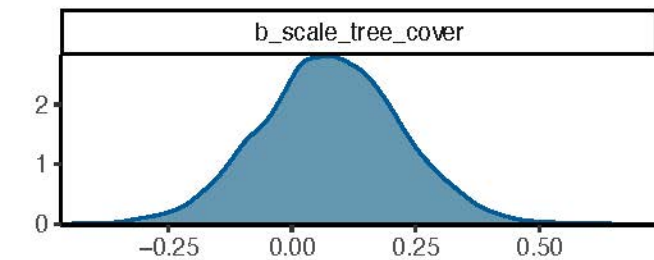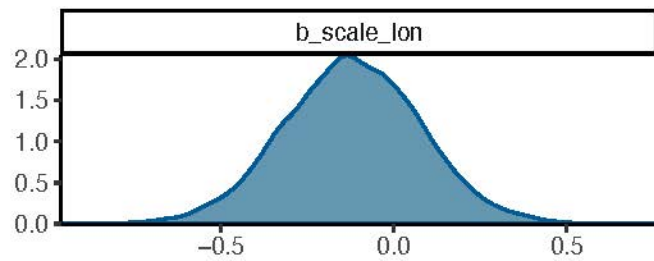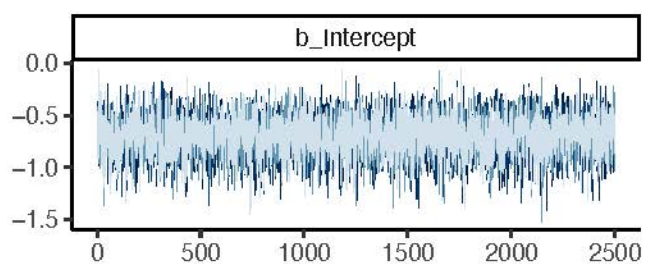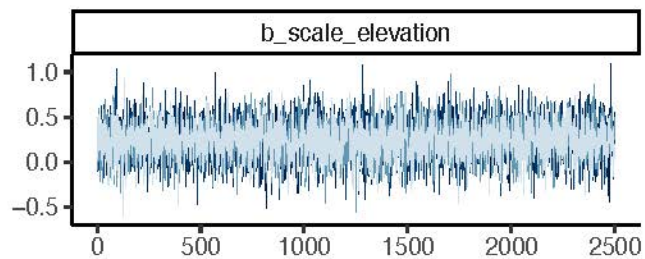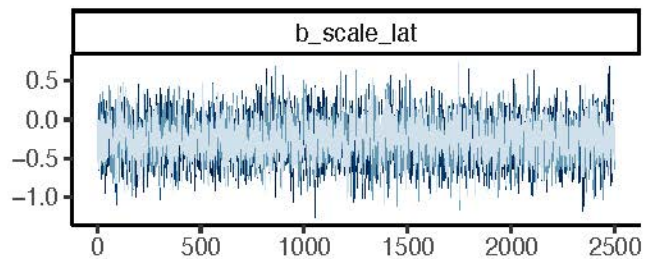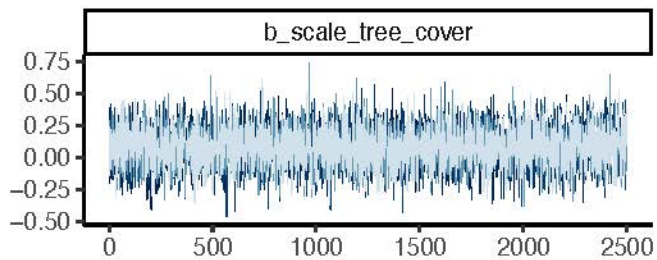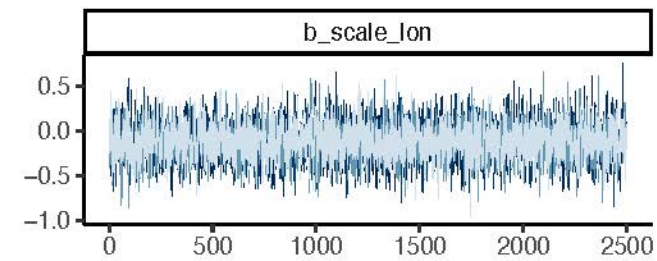

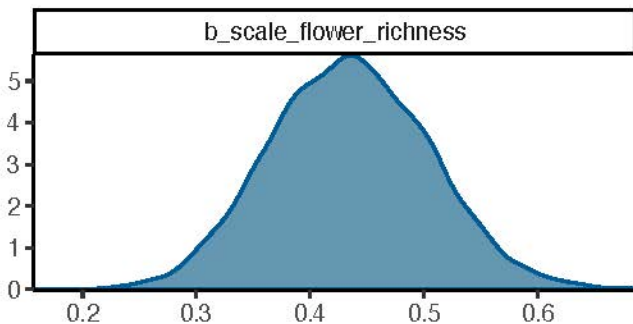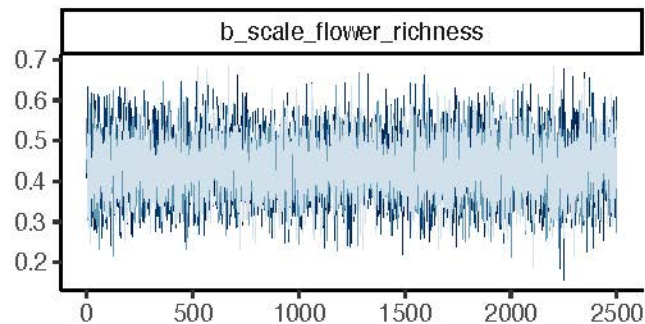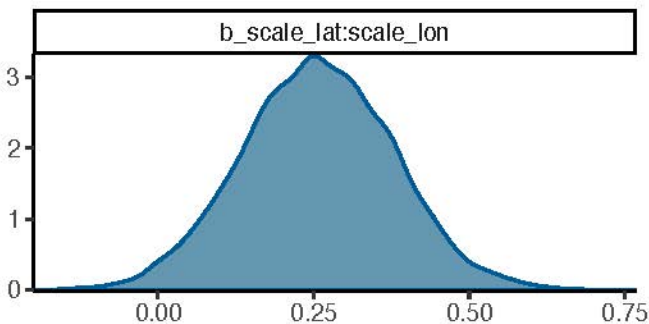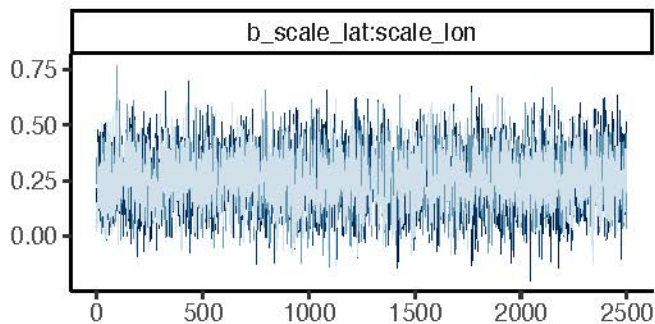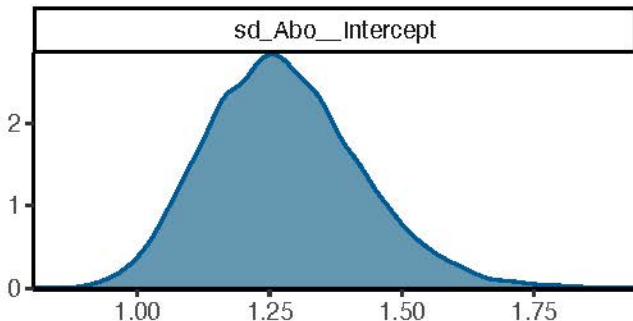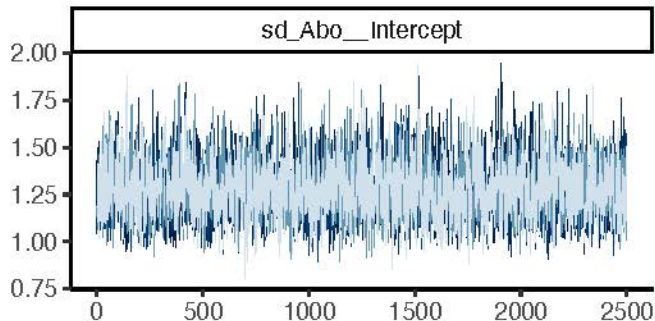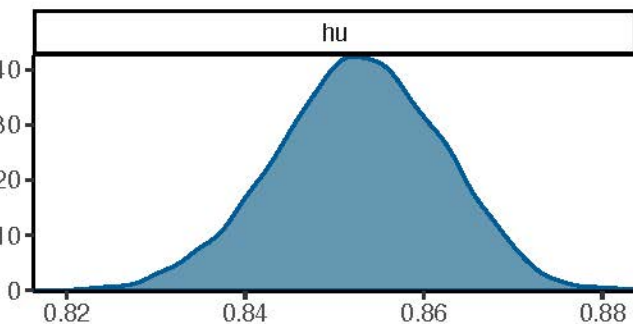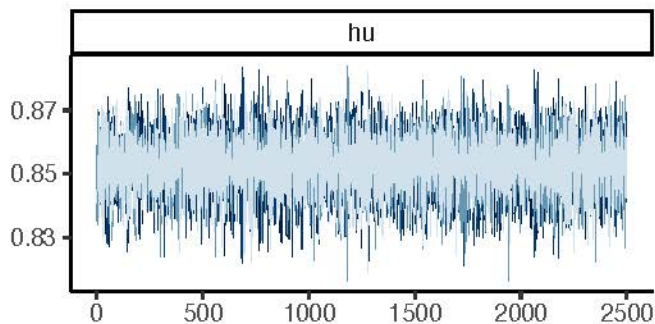

*hortorum*

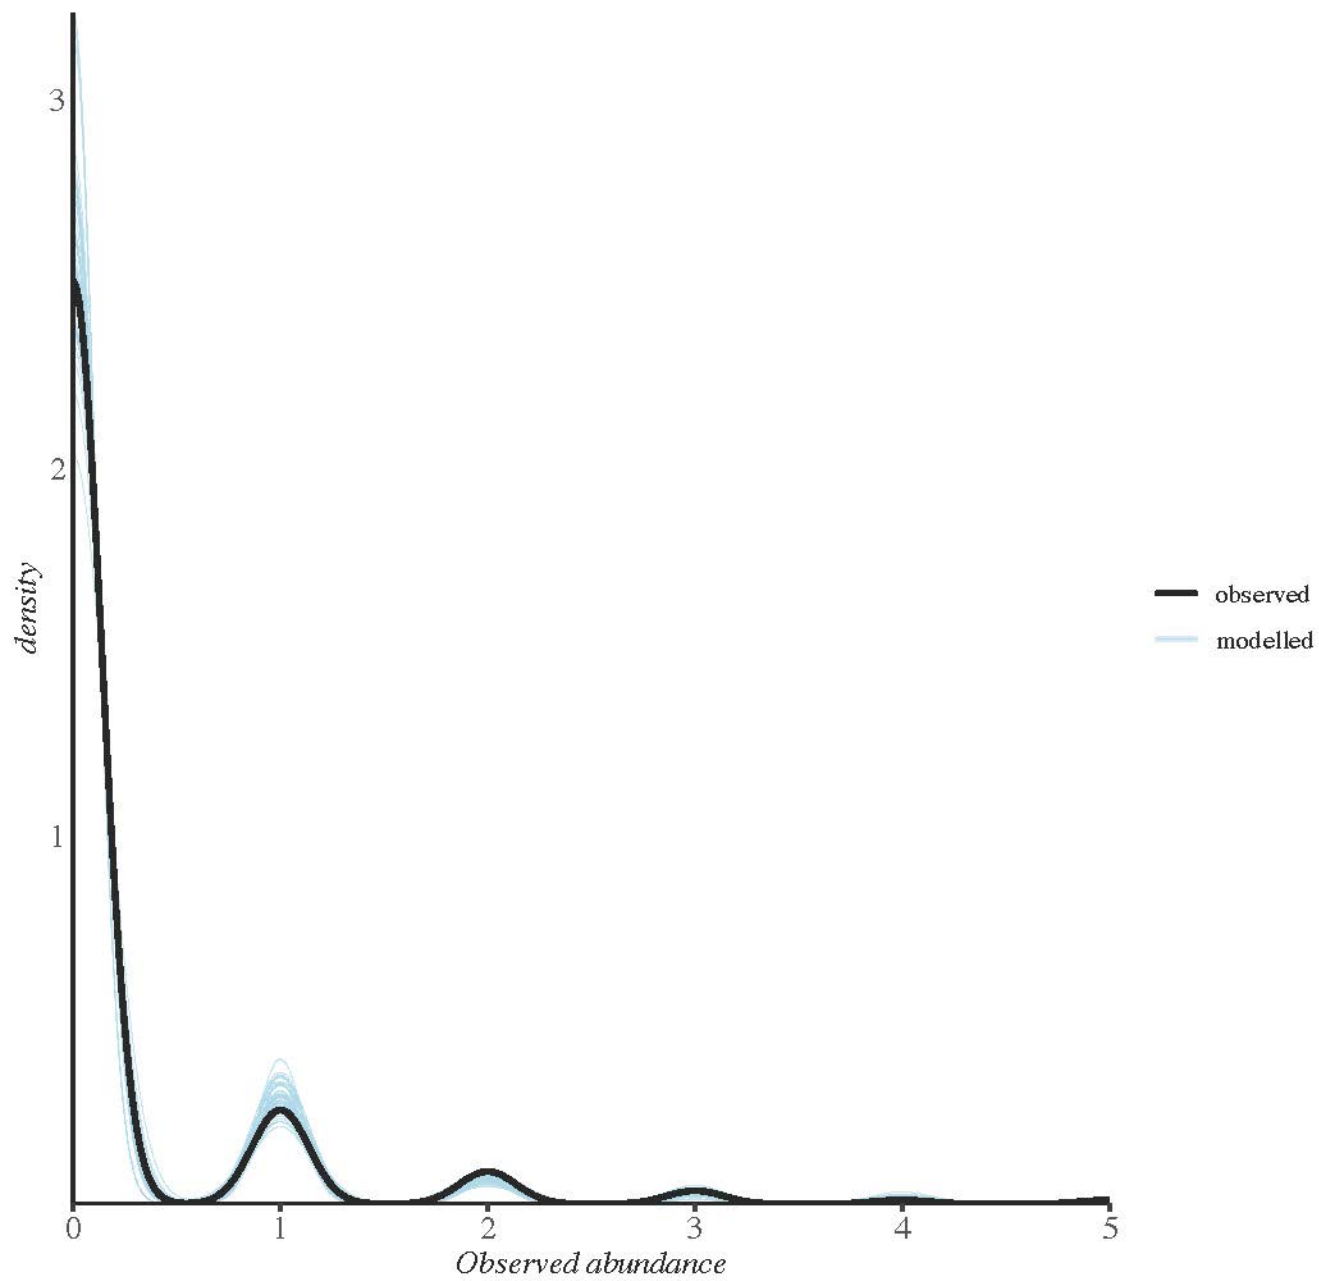

hypnorum

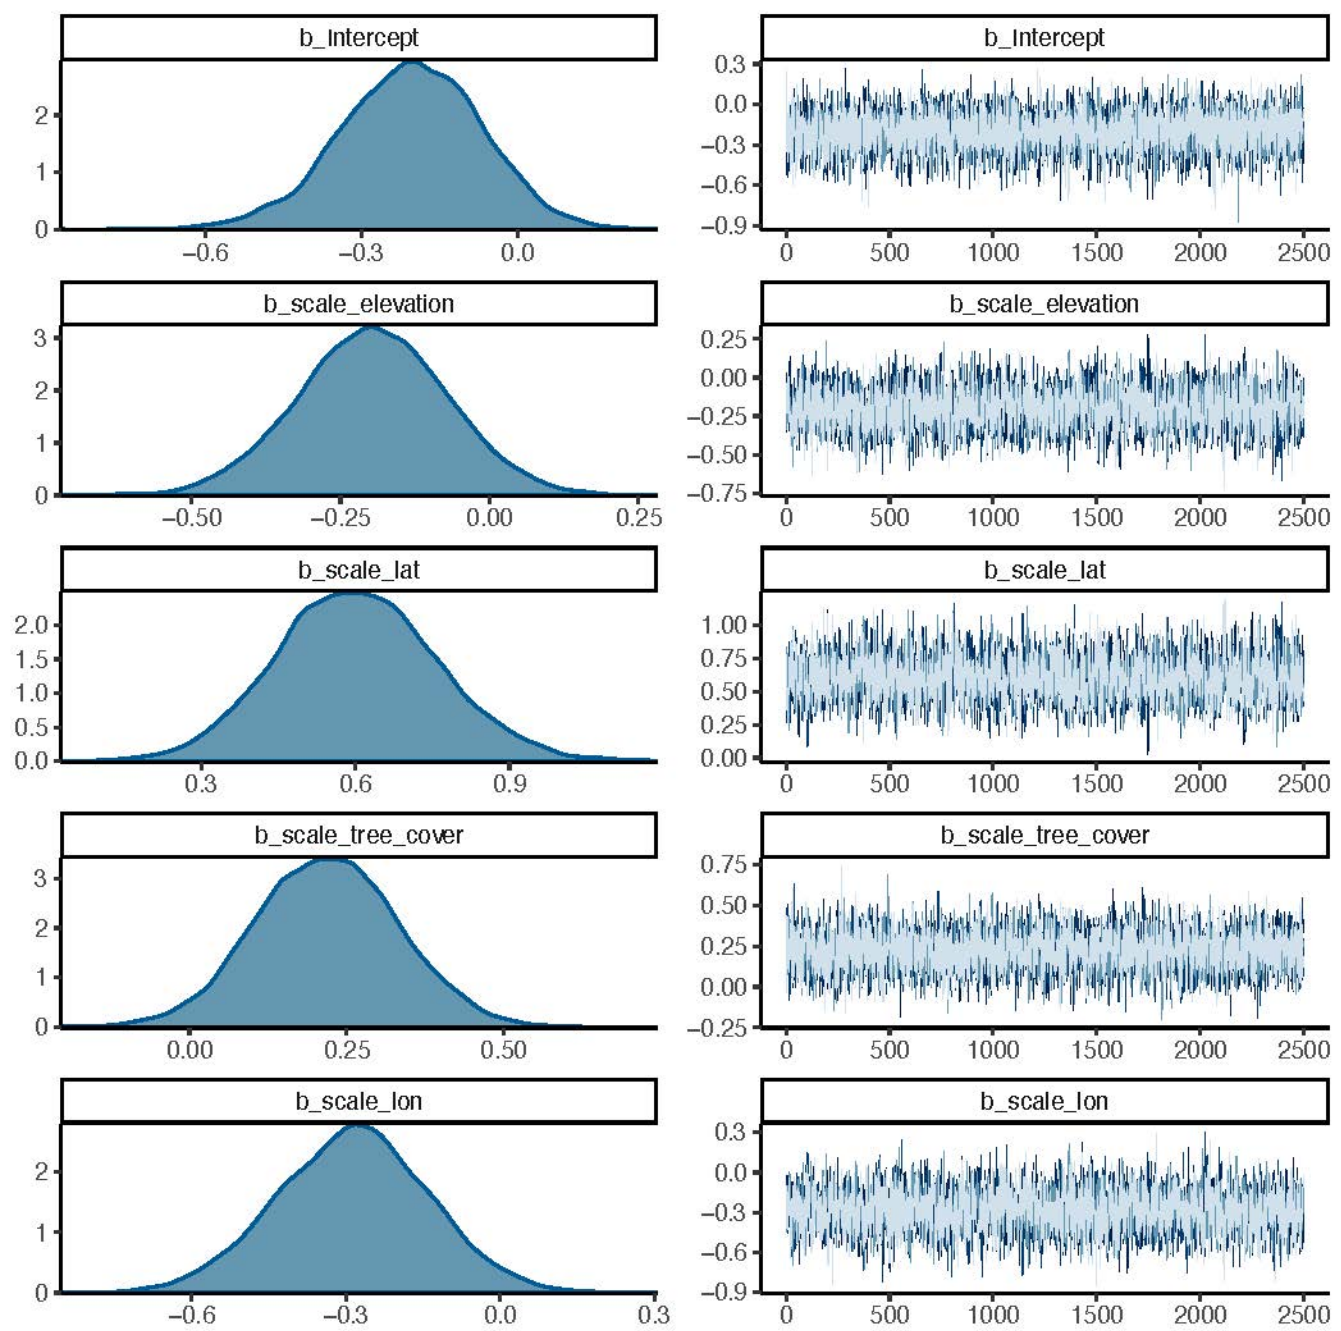



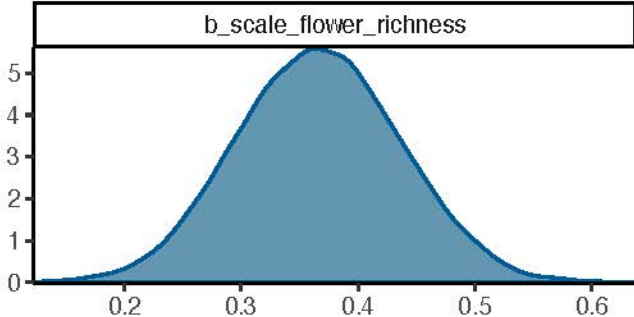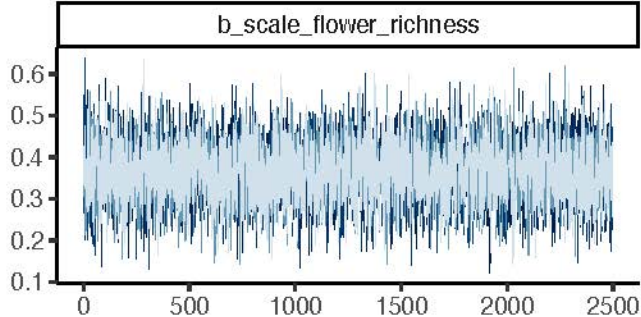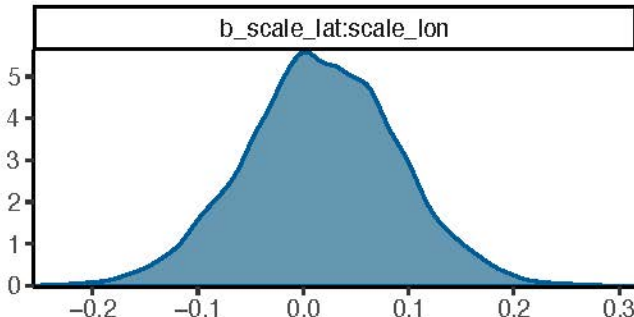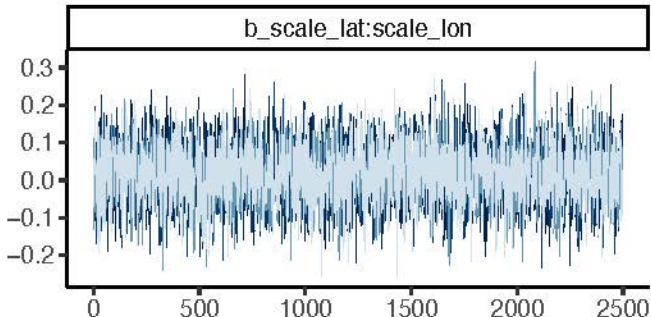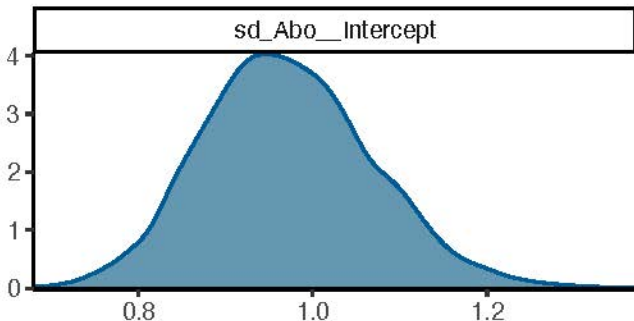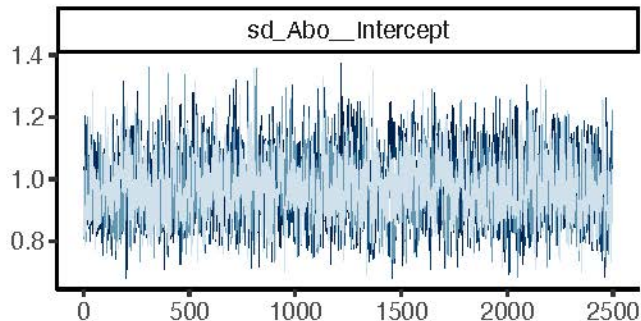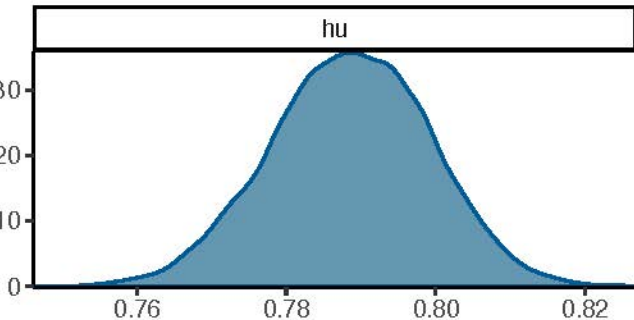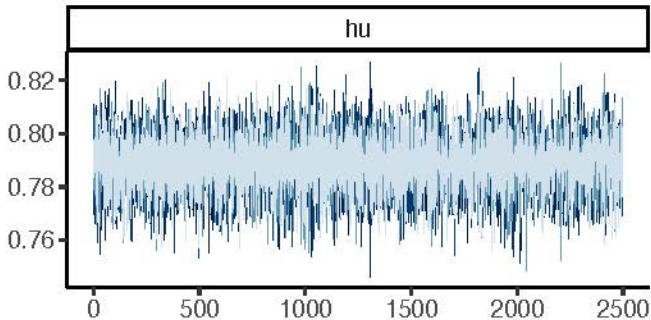



*hypnorum*

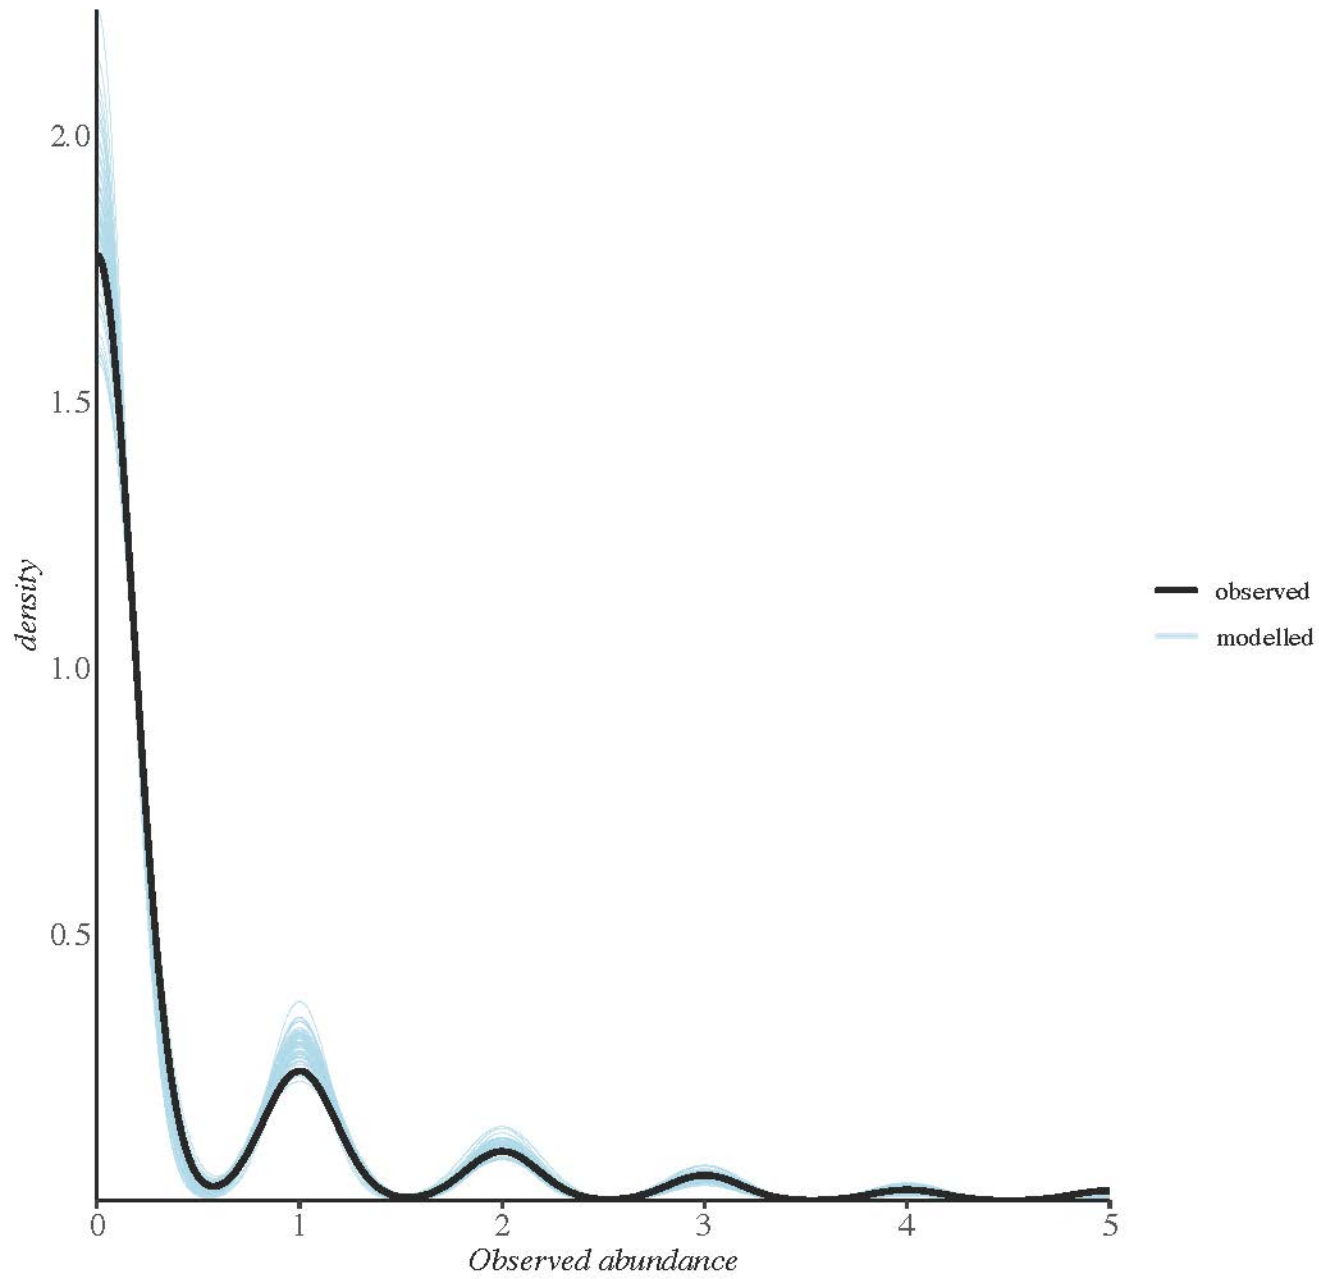

sylvarum

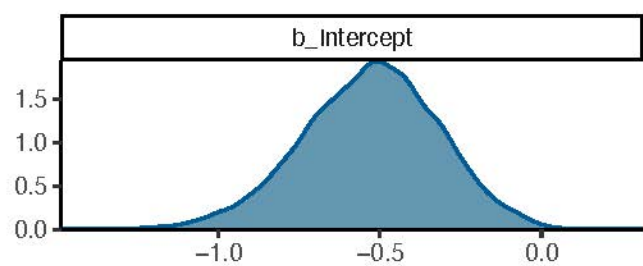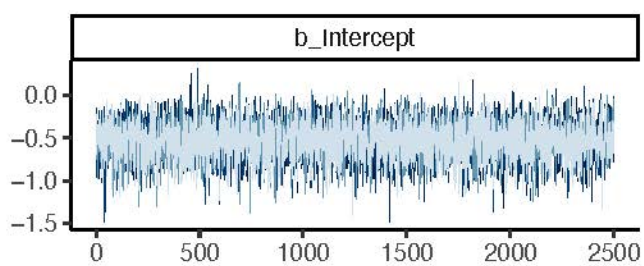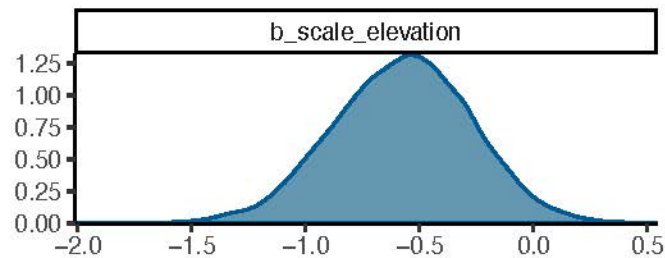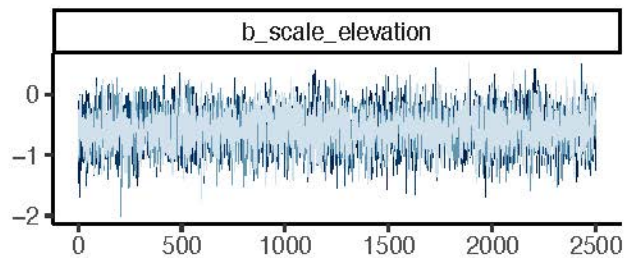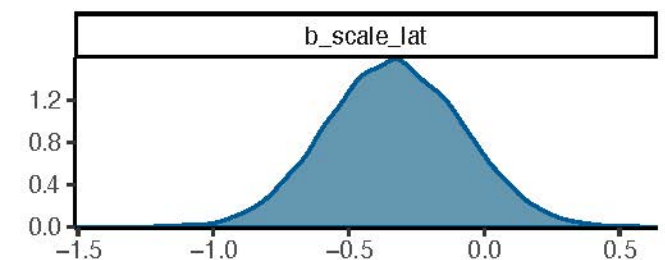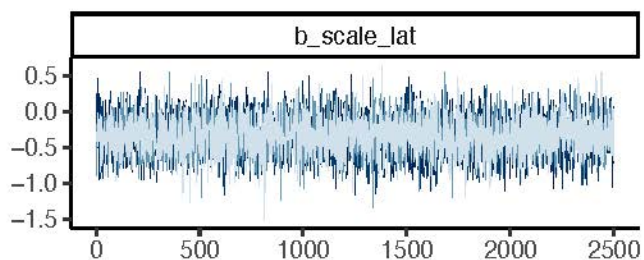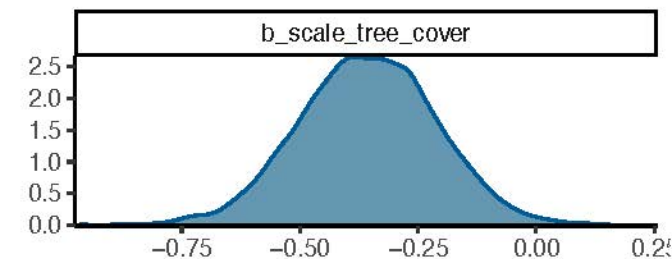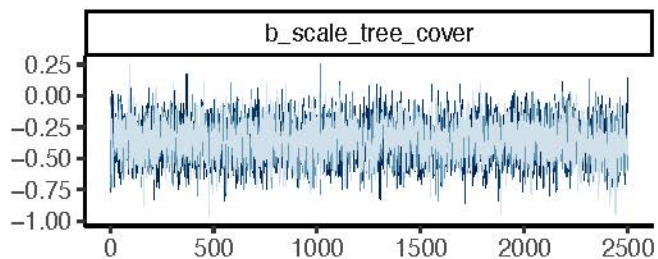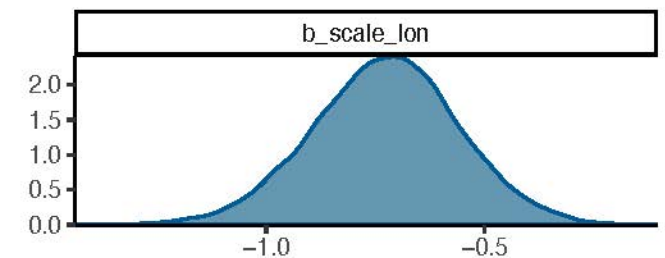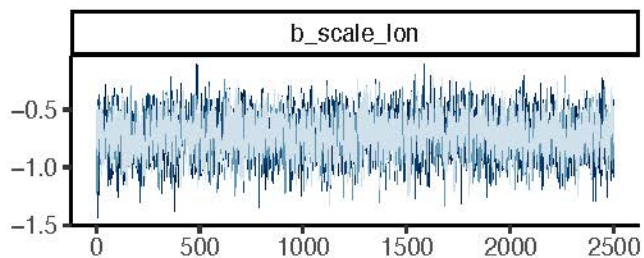

b\_scale\_flower\_richness

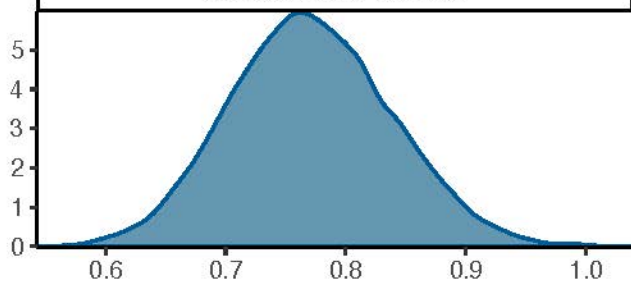

b\_scale\_flower\_richness

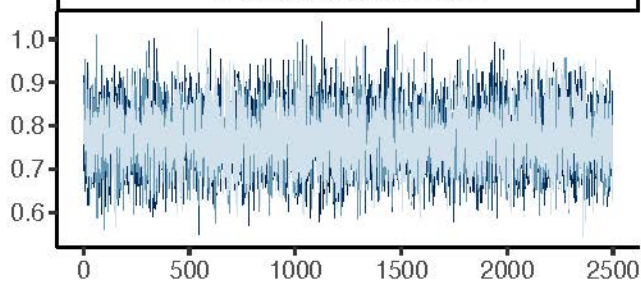

b\_scale\_lat:scale\_lon

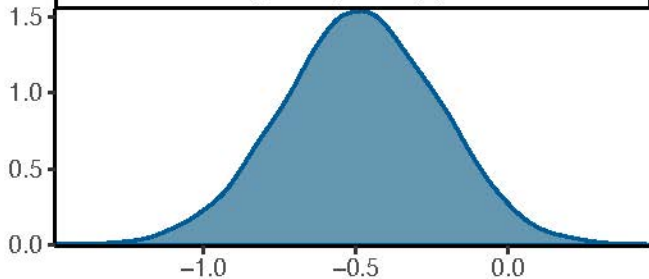

b\_scale\_lat:scale\_lon

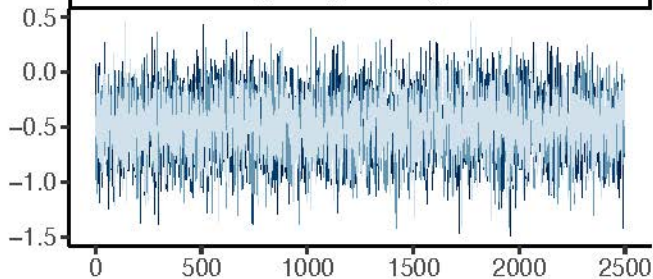

sd\_Abo\_\_Intercept

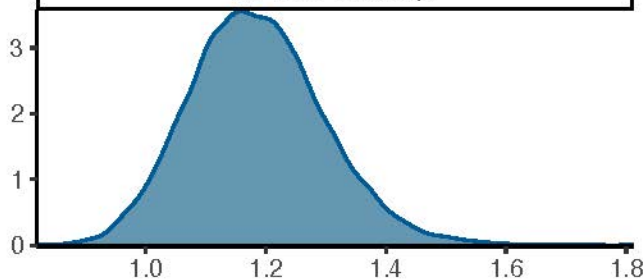

sd\_Abo\_\_Intercept

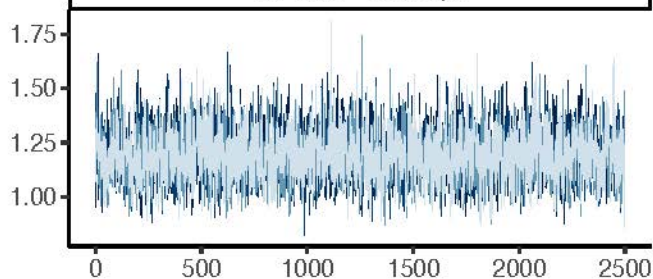

hu

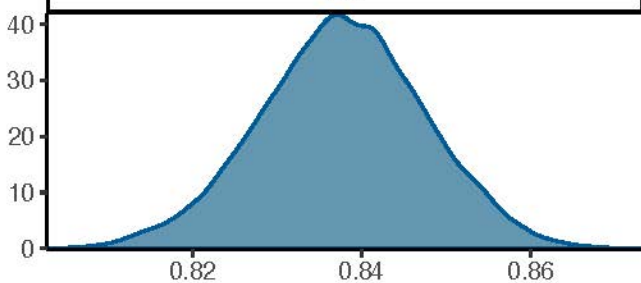

hu

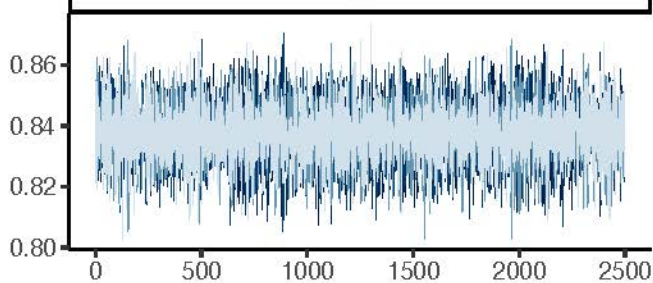

*sylvarum*

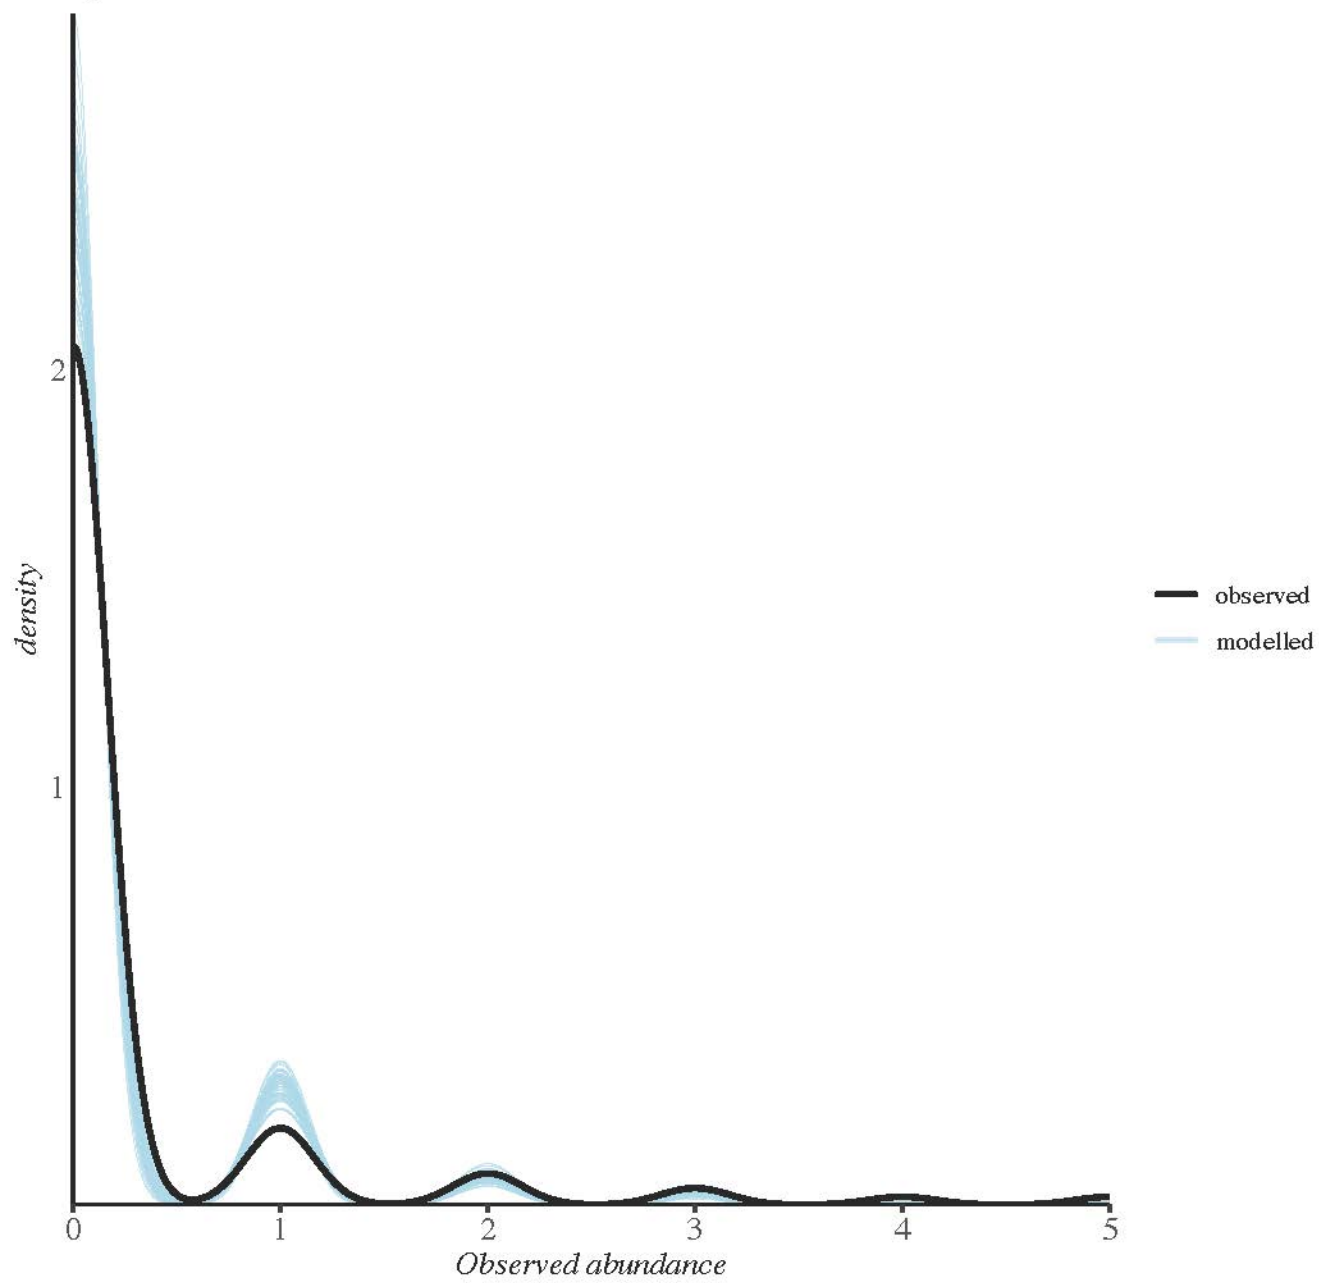

jonellus

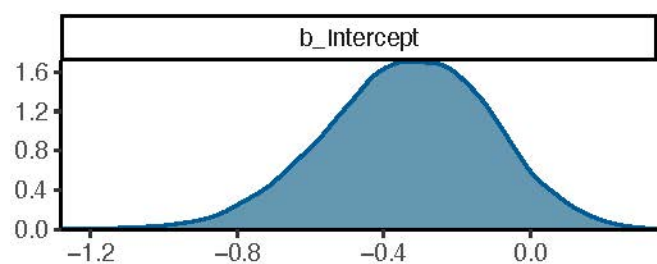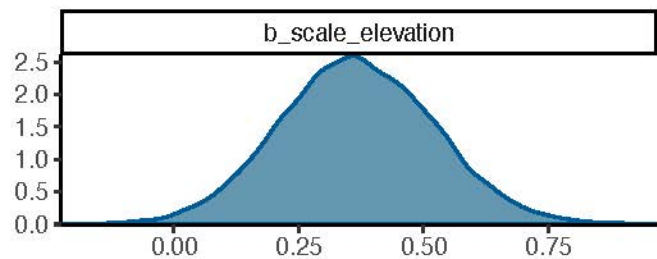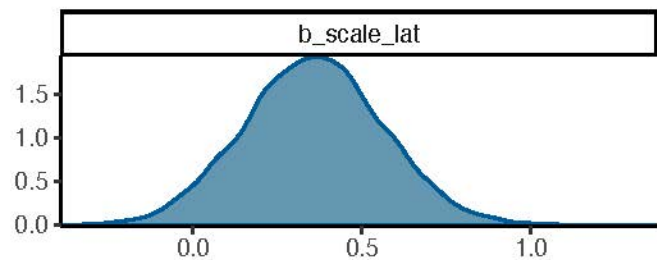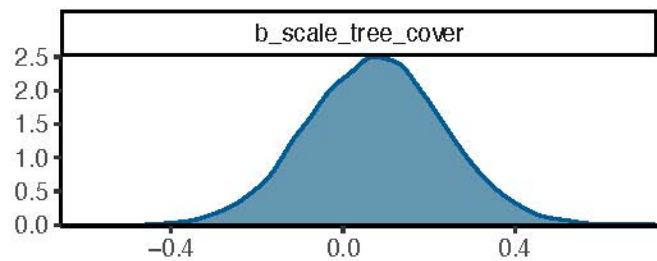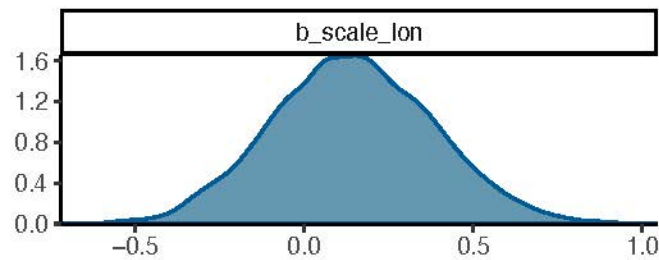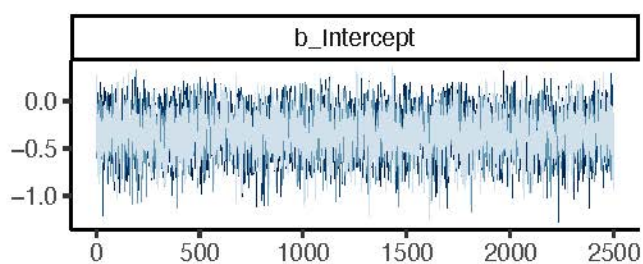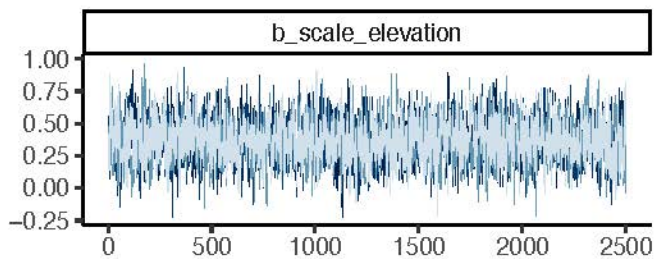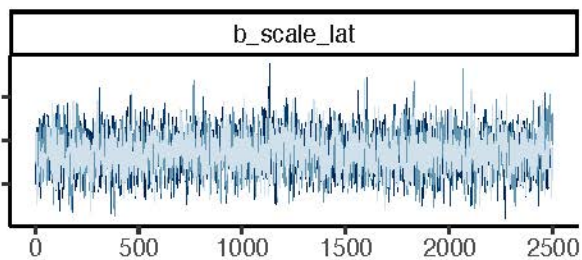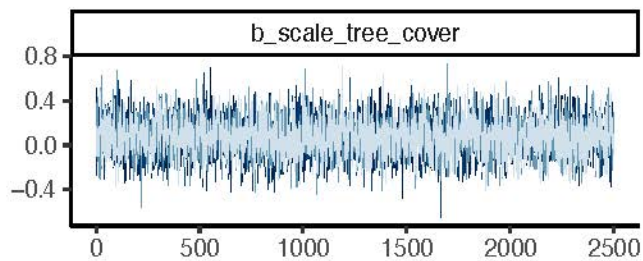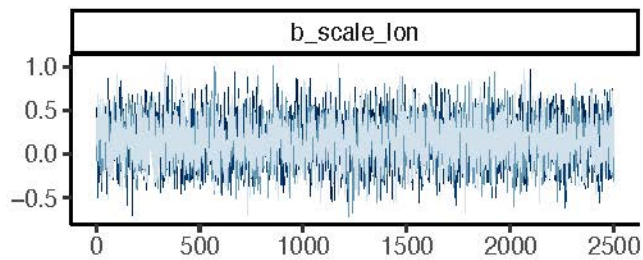



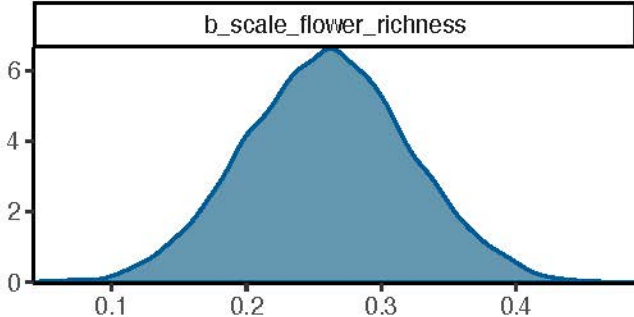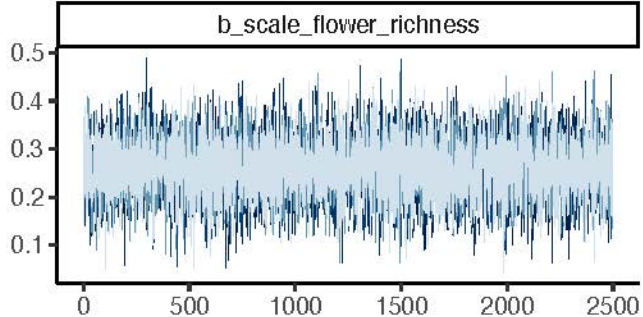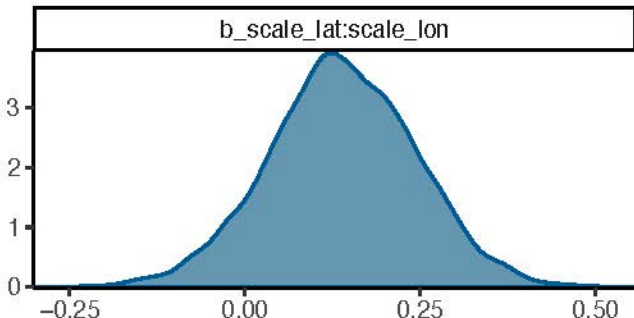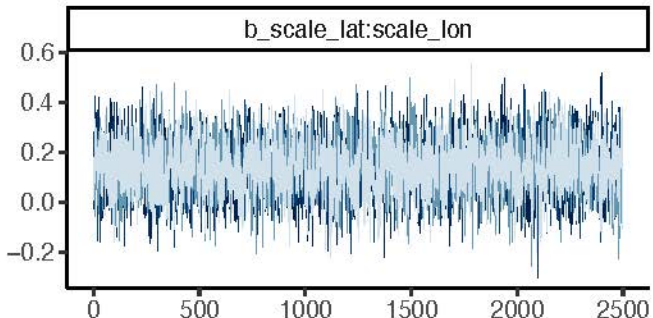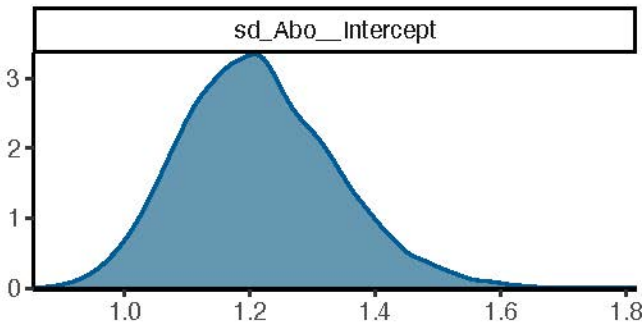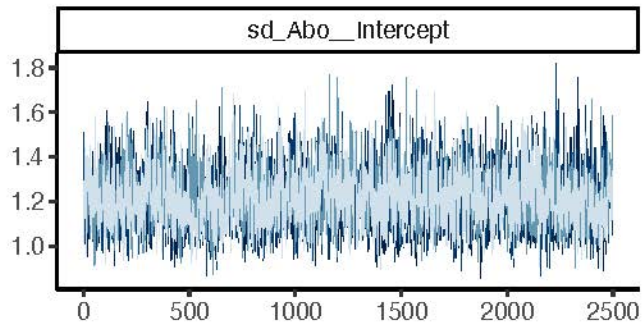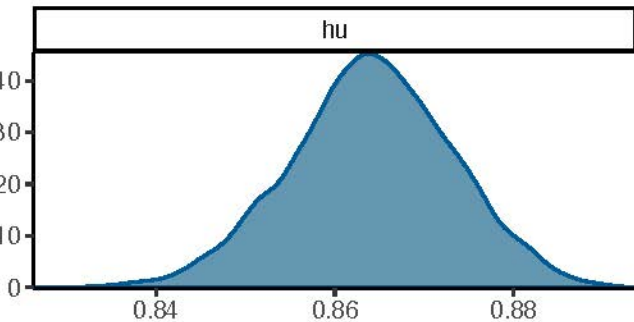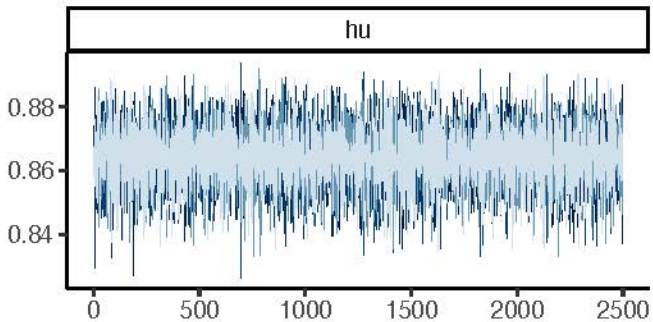

*jonellus*

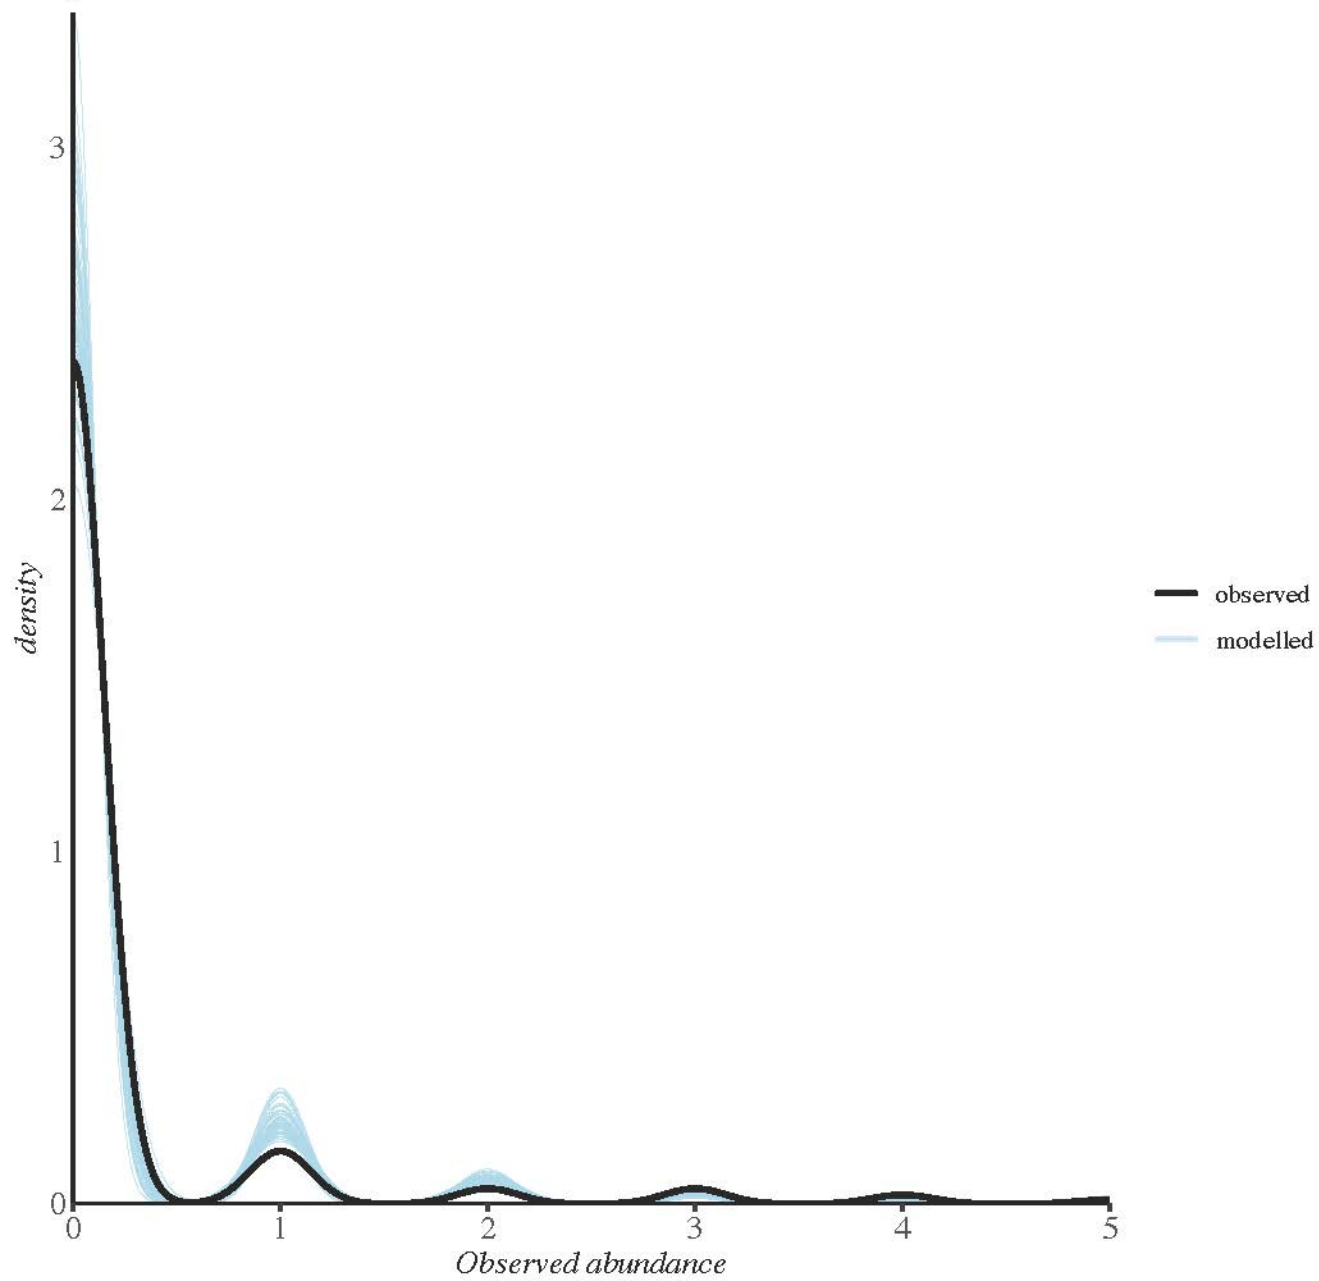

soroceensi

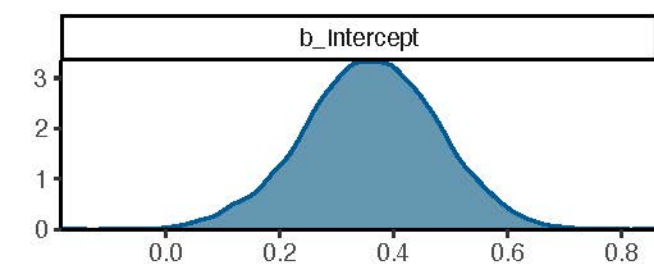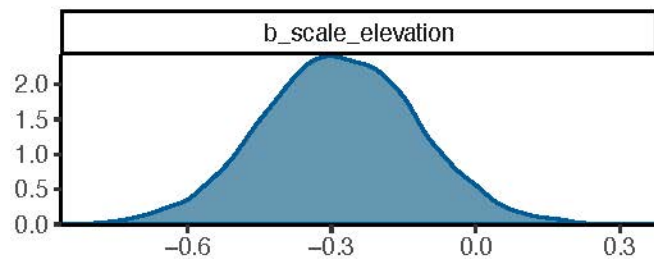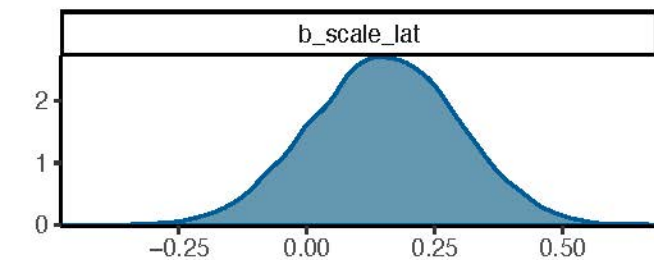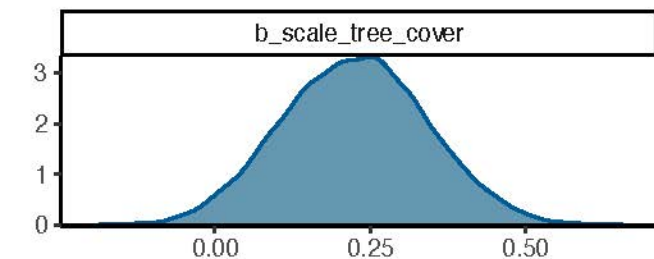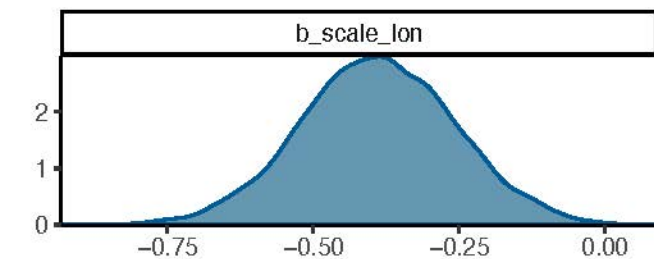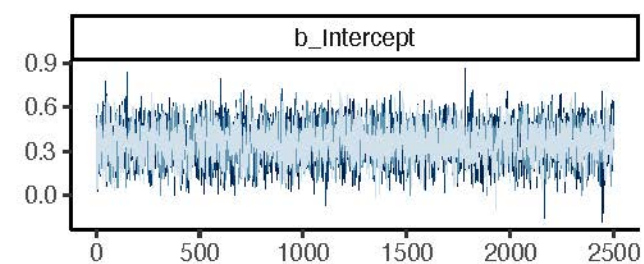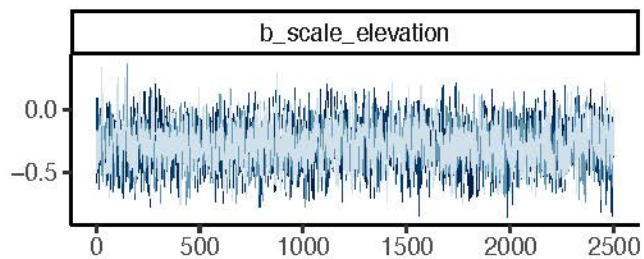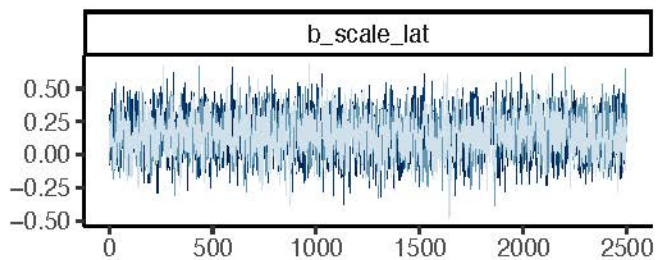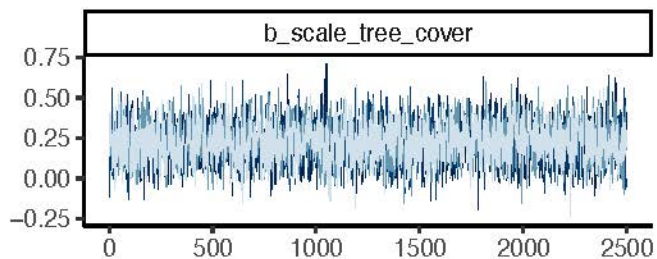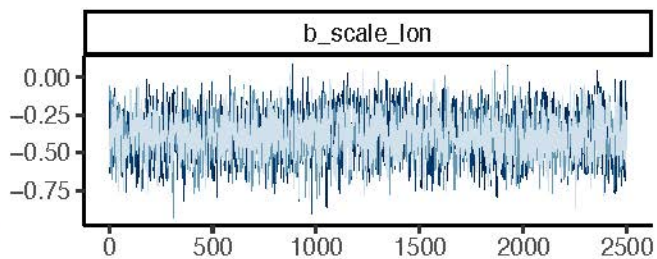

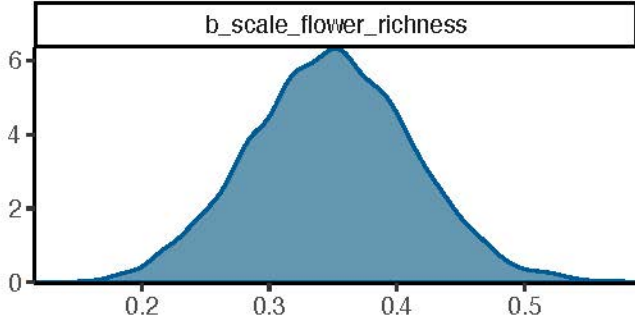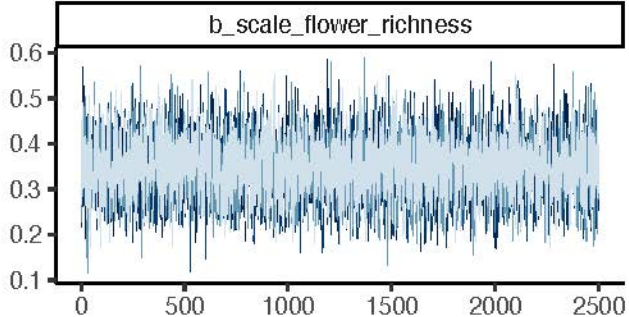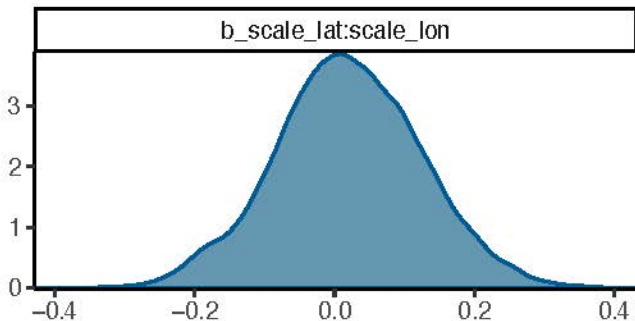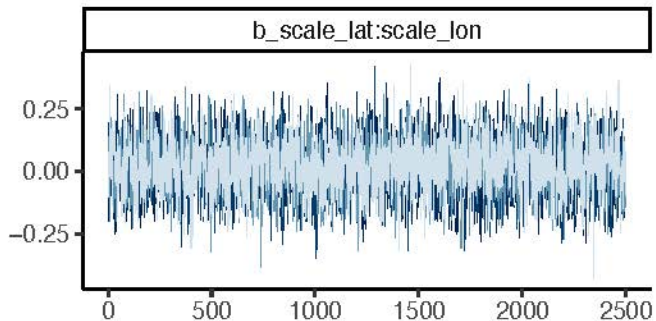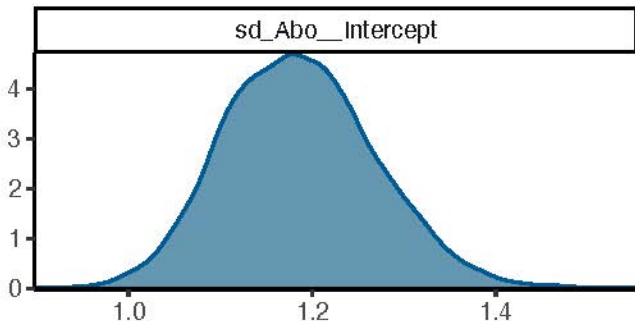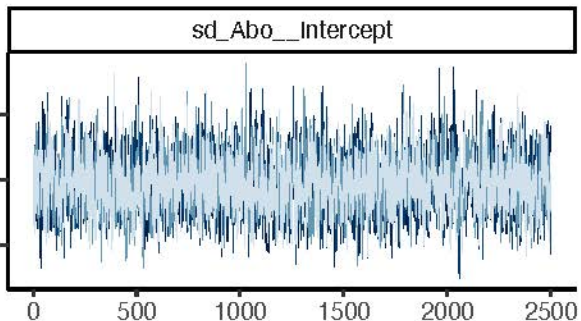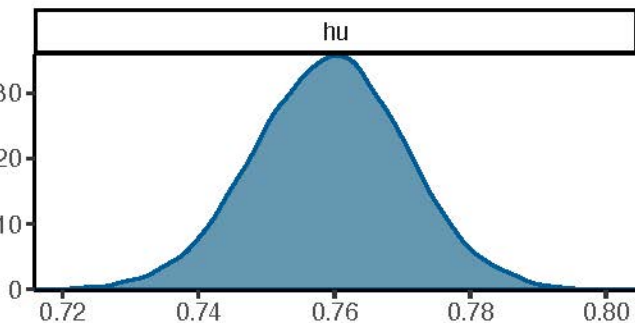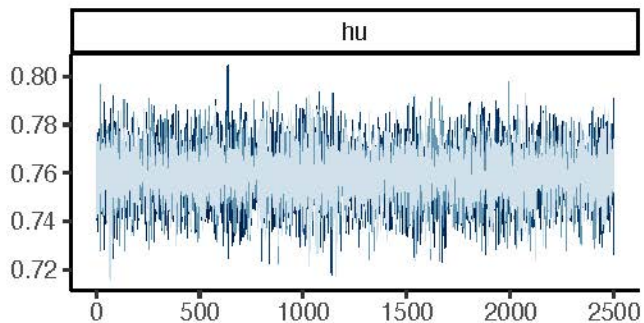

*soroensis*

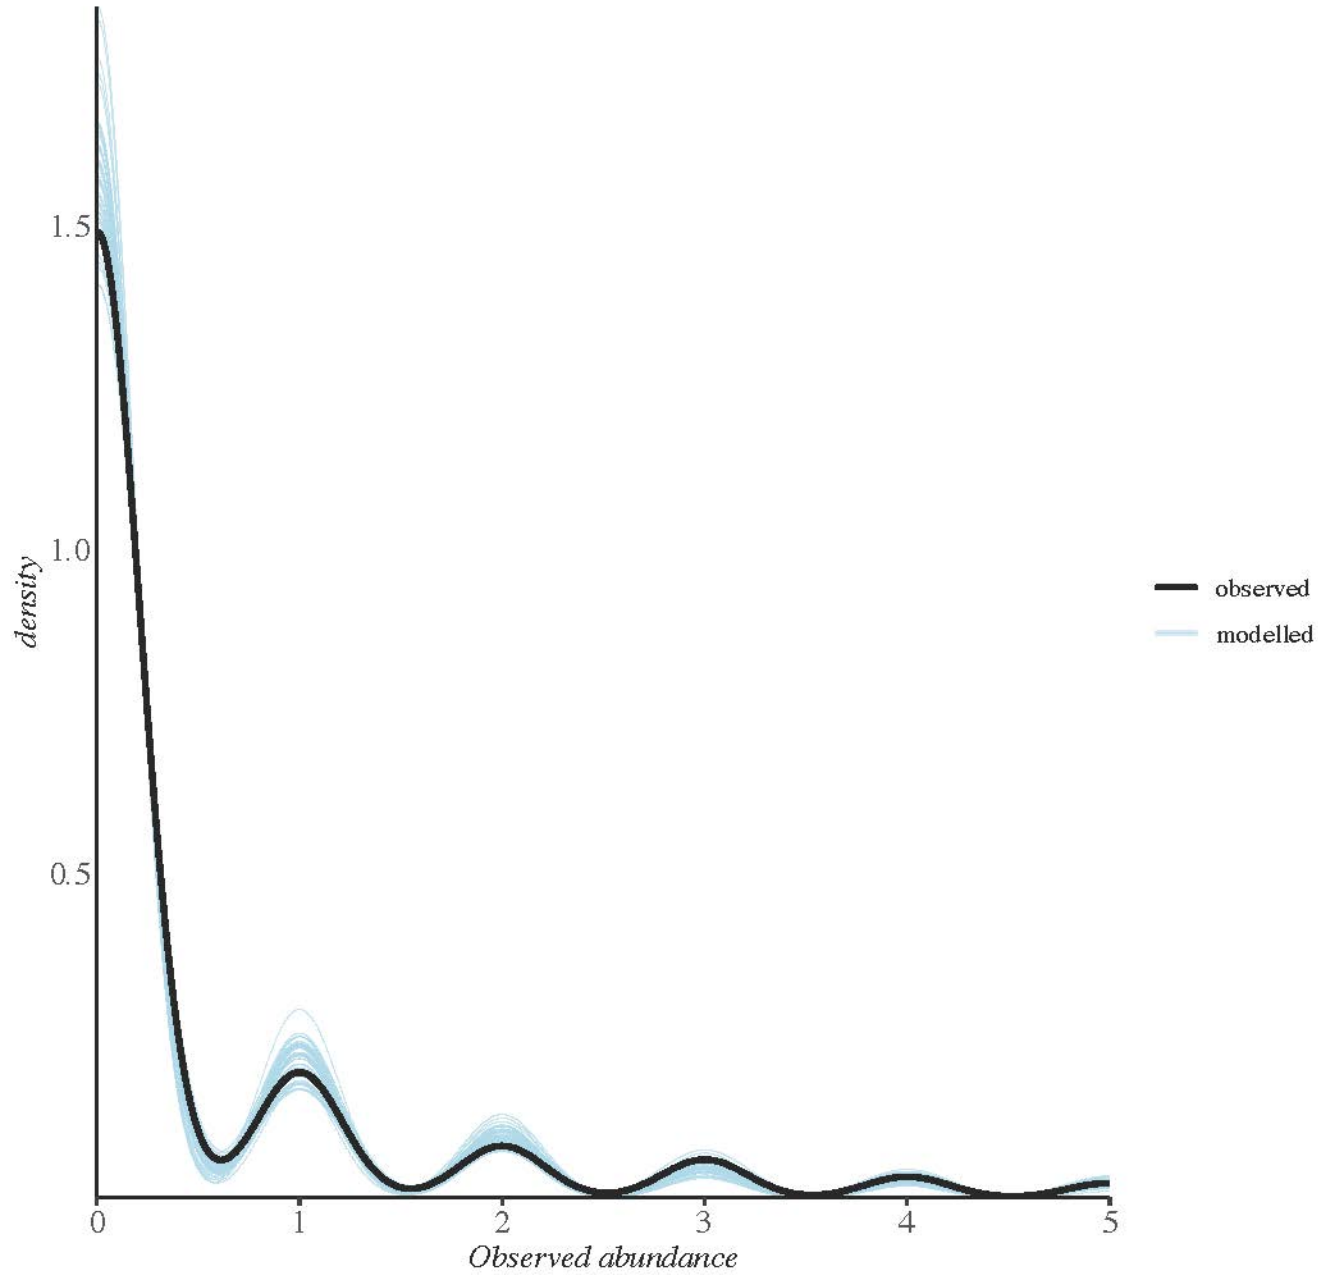

lapidariu



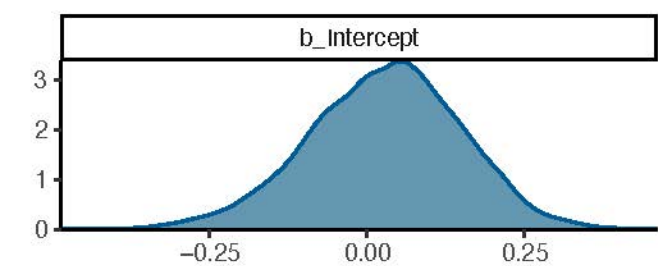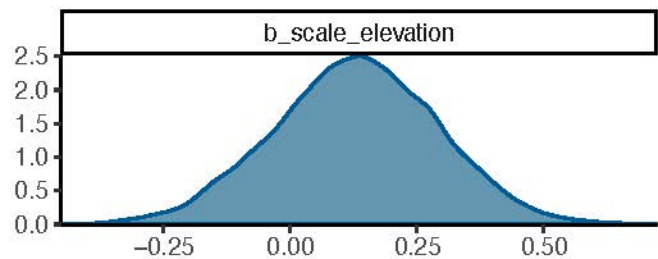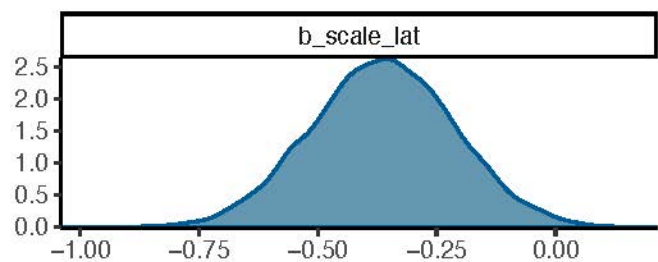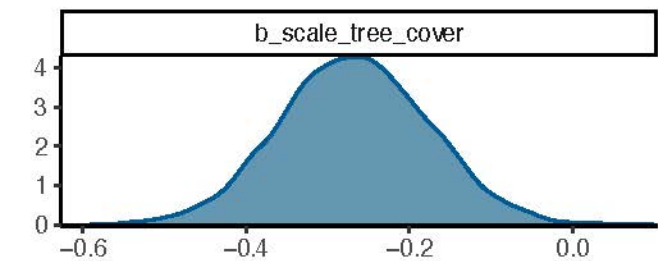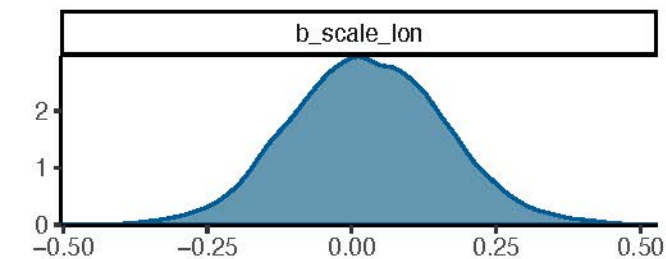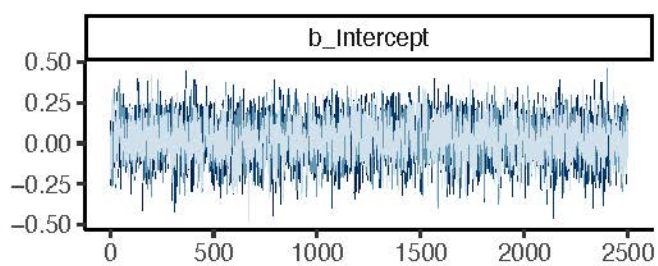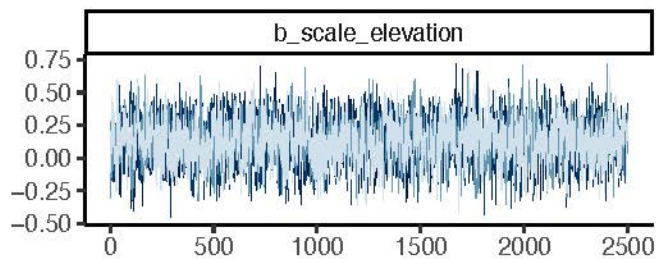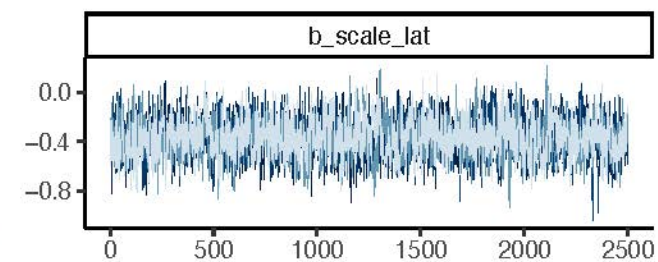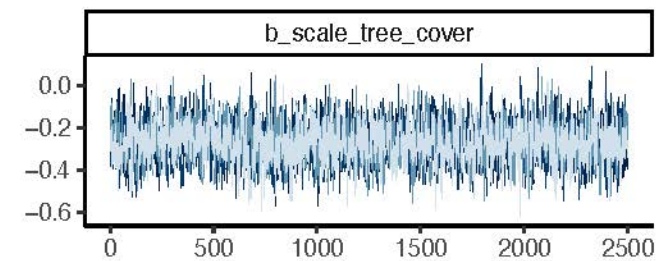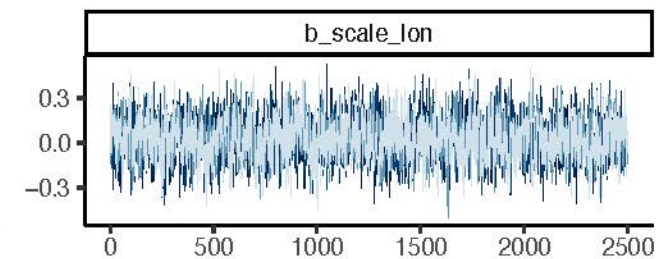

b\_scale\_flower\_richness

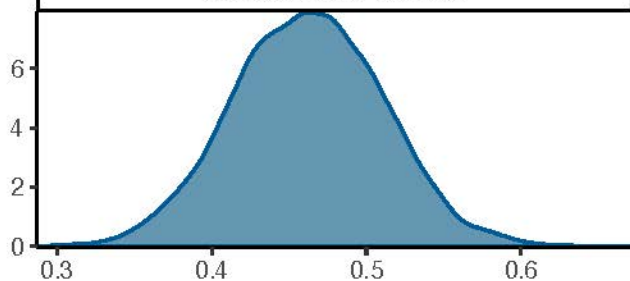

b\_scale\_flower\_richness

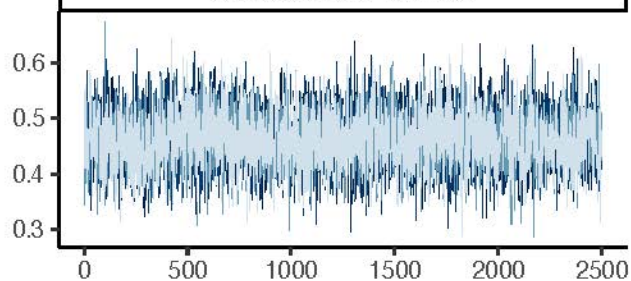

b\_scale\_lat:scale\_lon

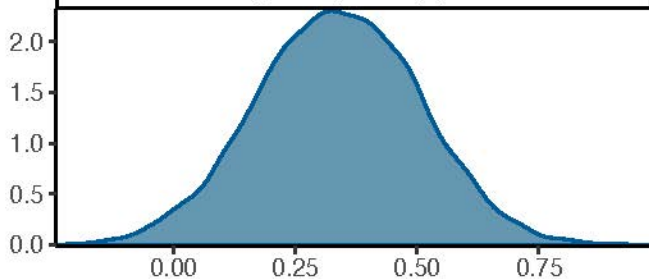

b\_scale\_lat:scale\_lon

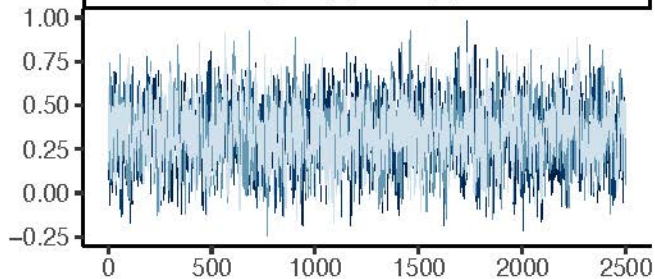

sd\_Abo\_\_Intercept

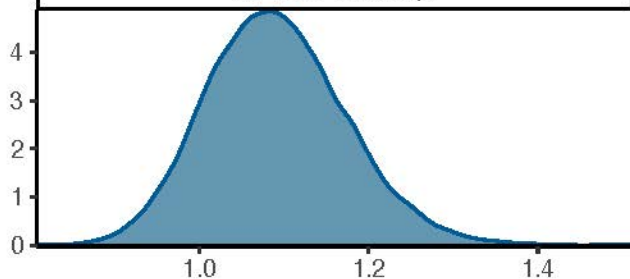

sd\_Abo\_\_Intercept

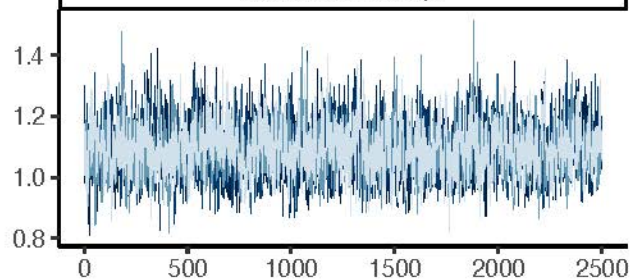

hu

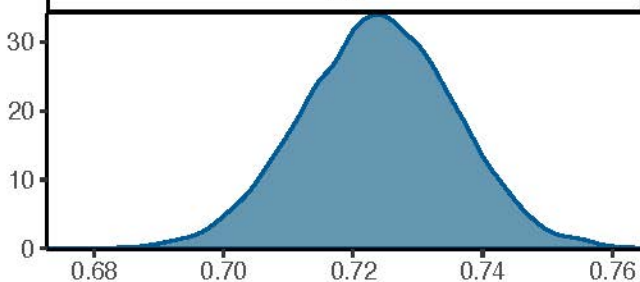

hu

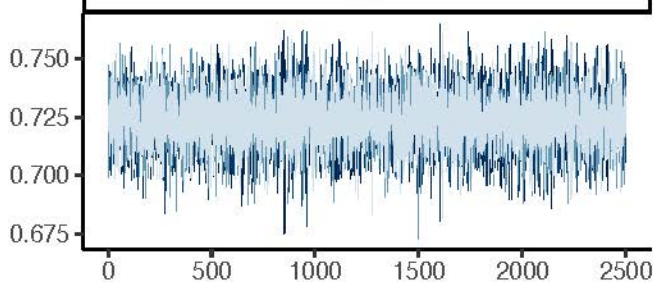

*lapidariu*

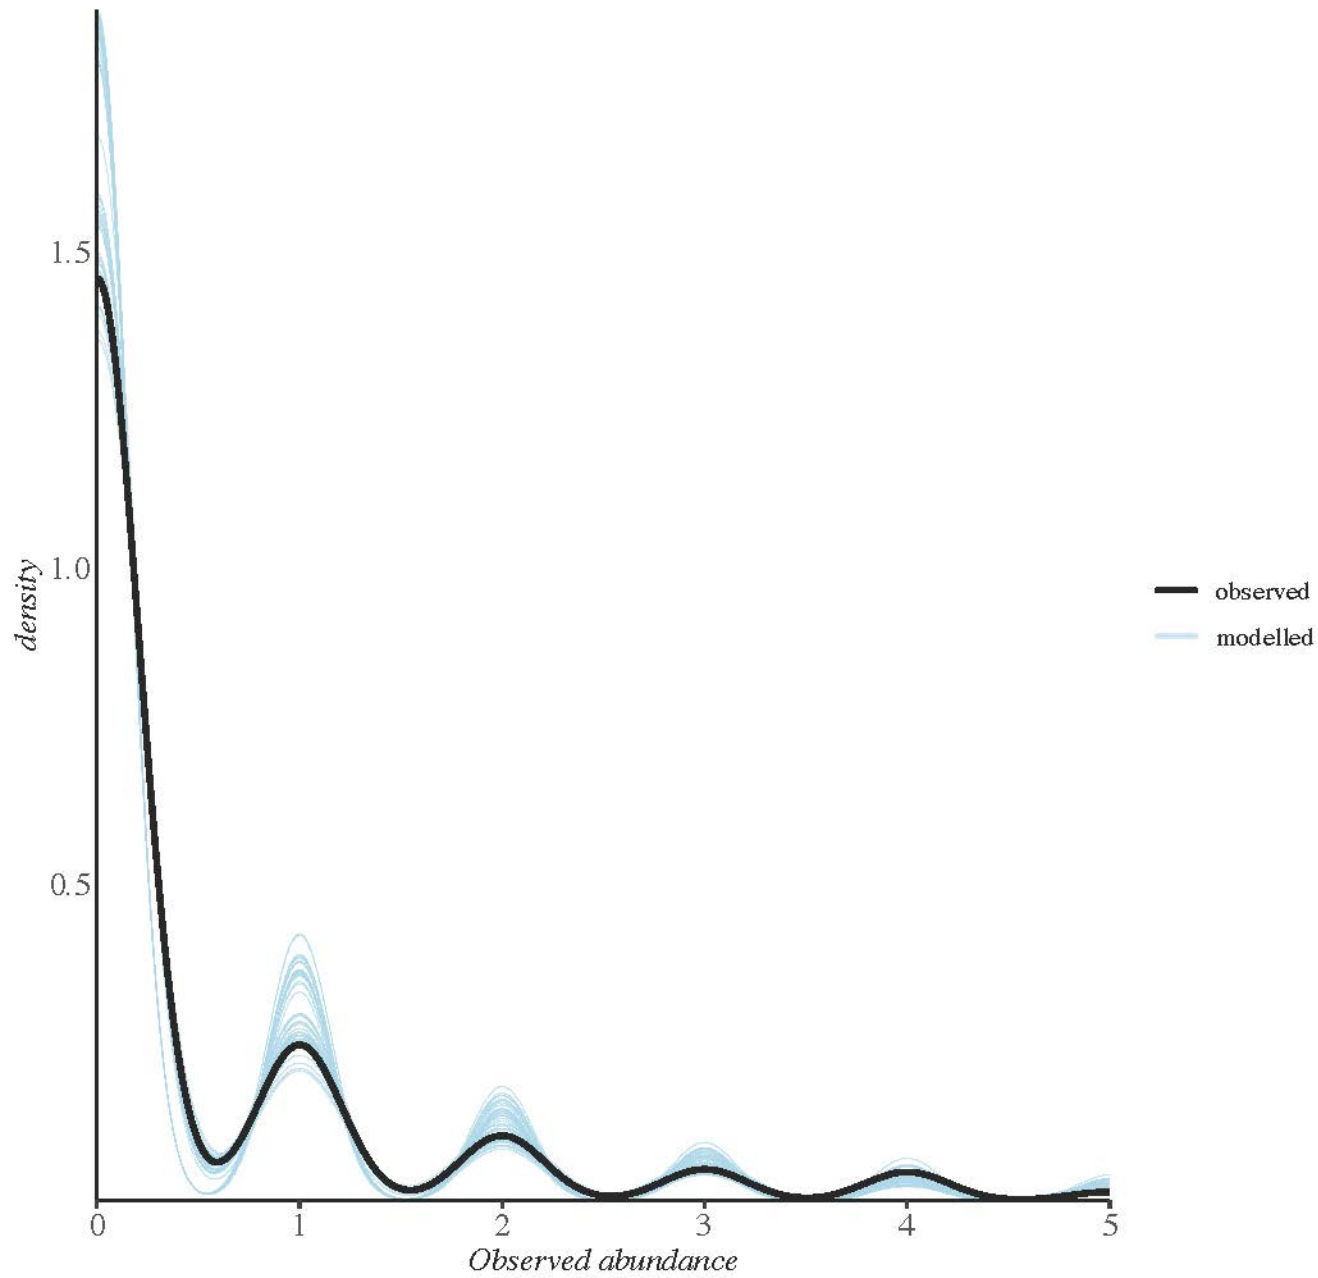

terrestri

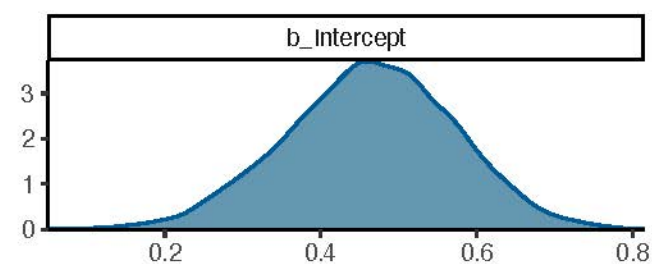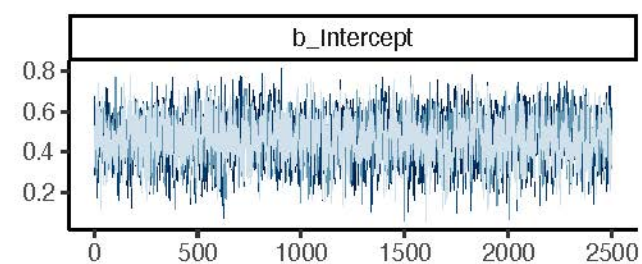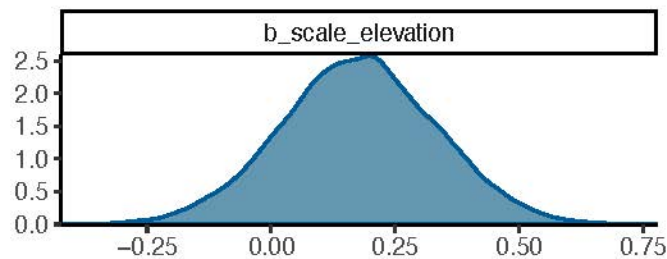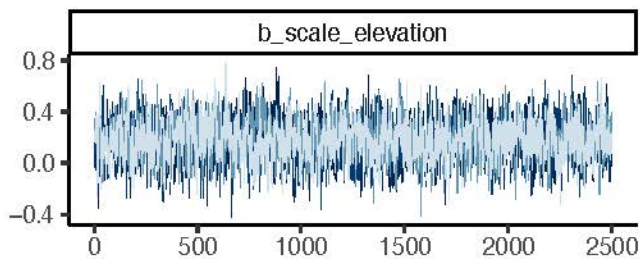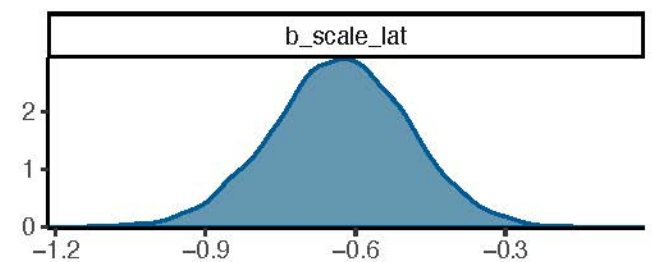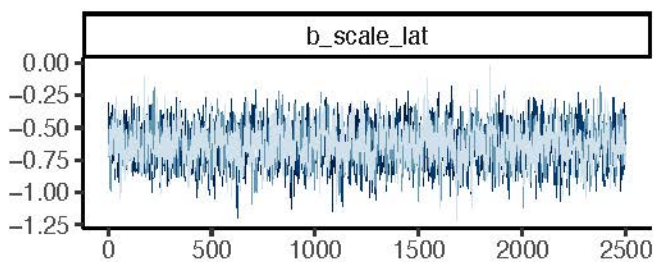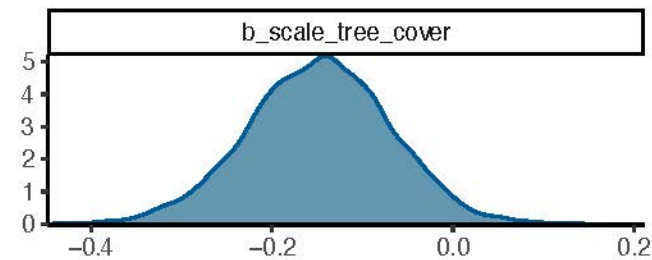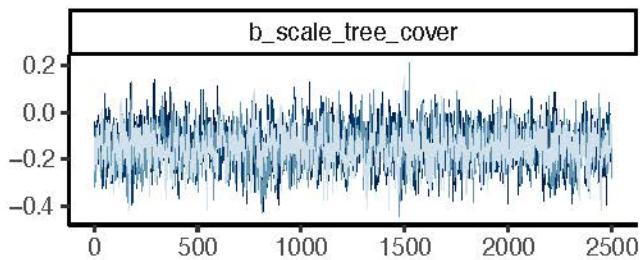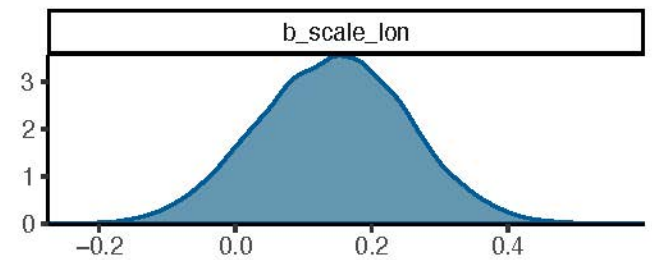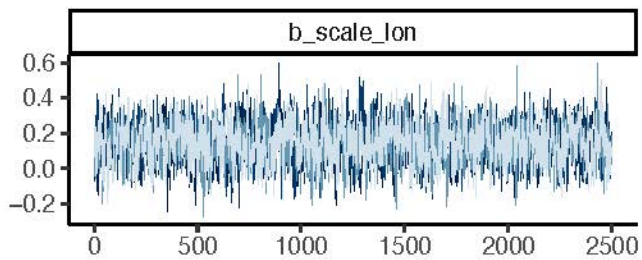



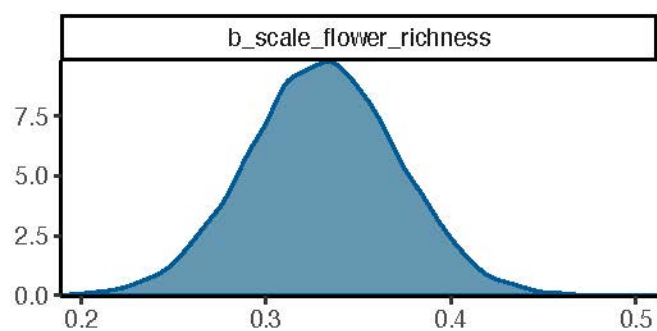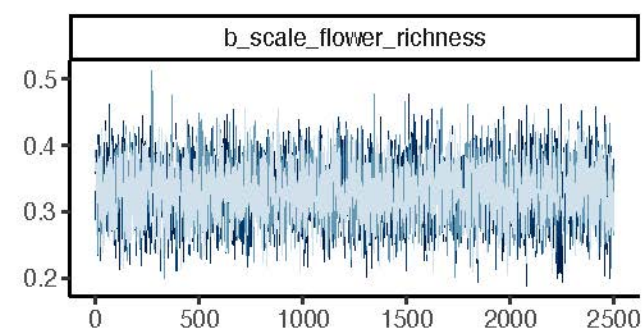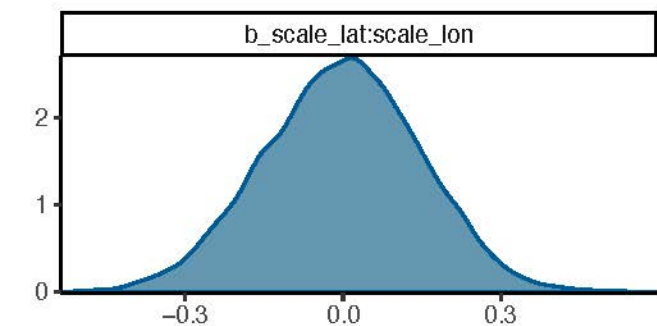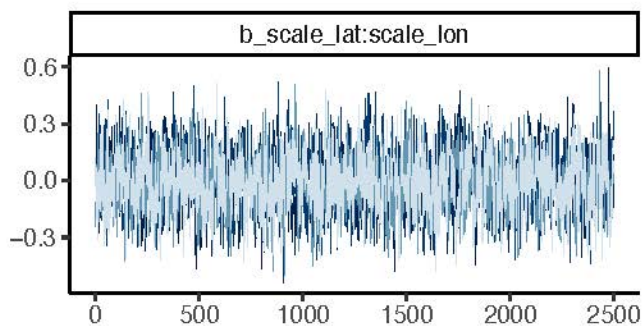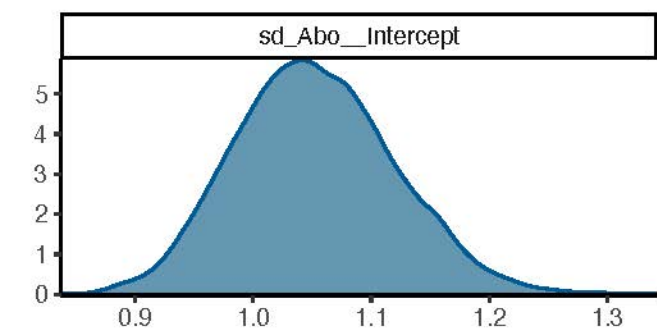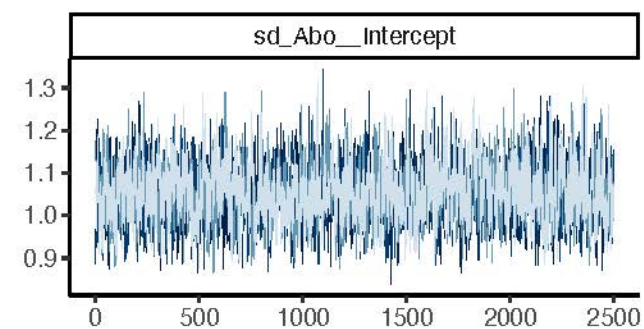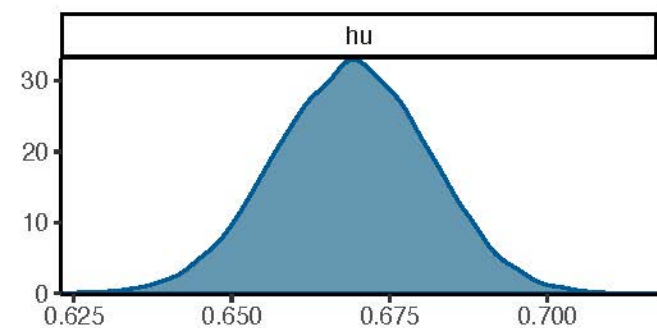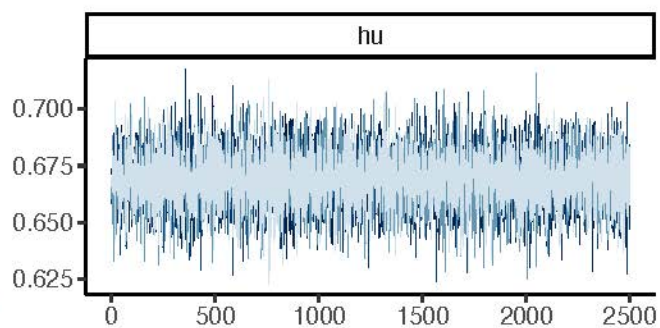

*terrestri*

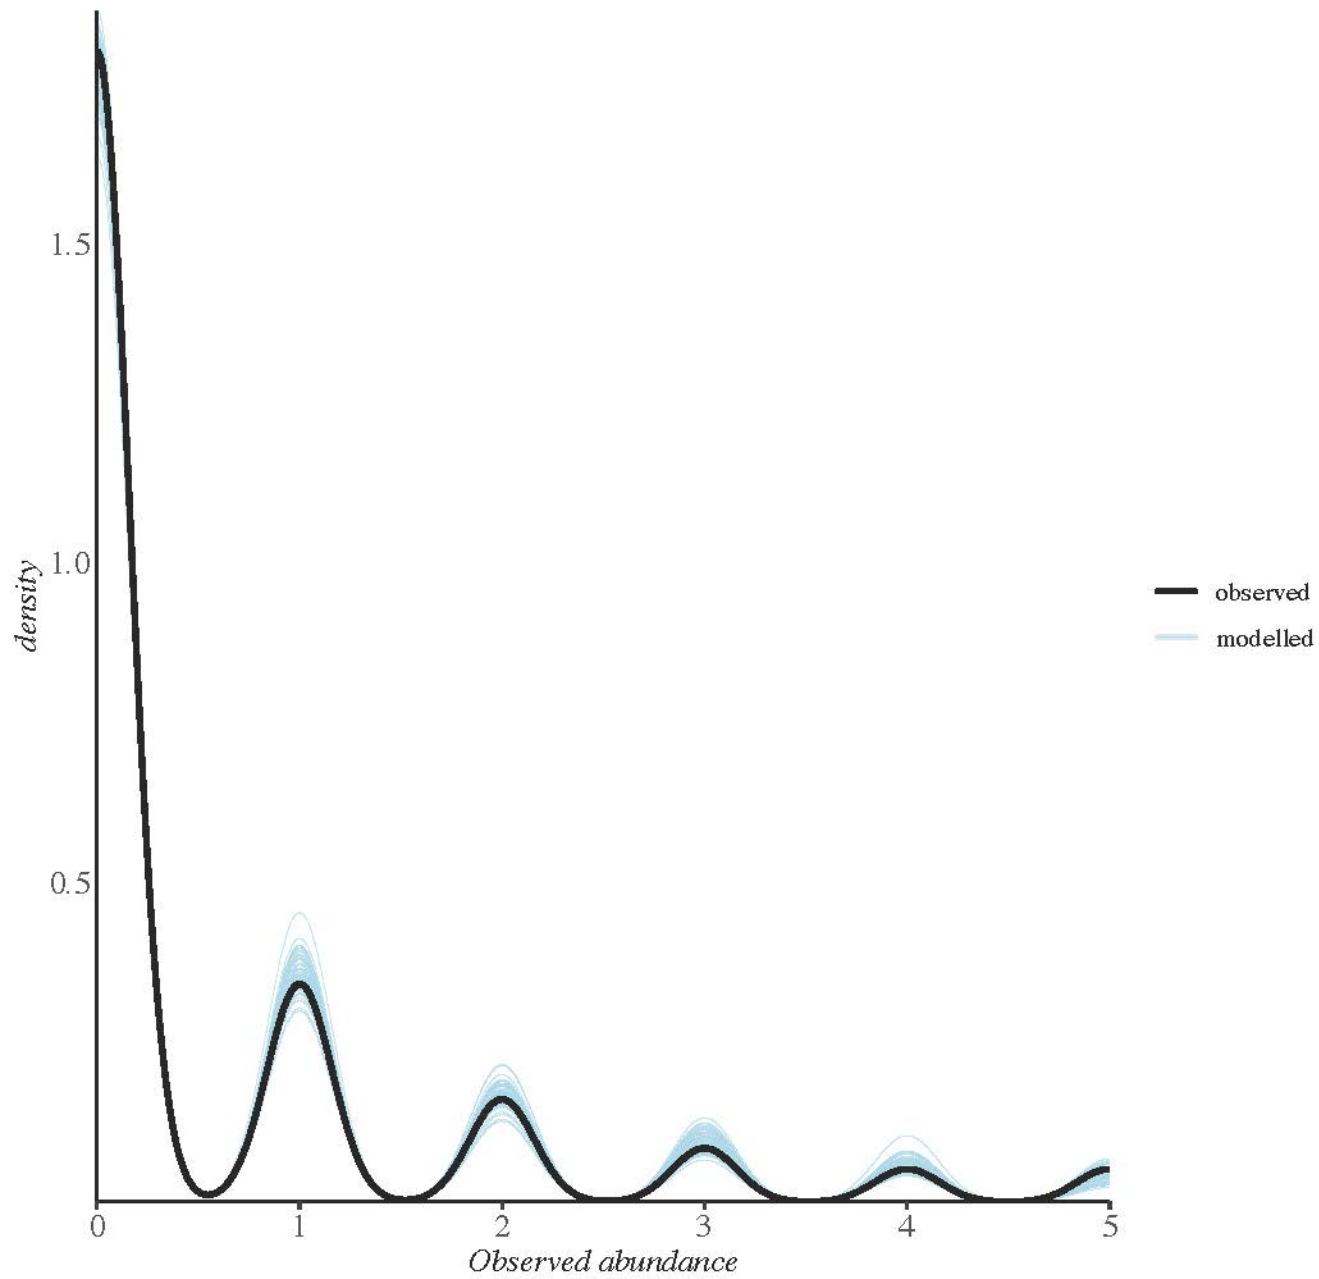



pratorum

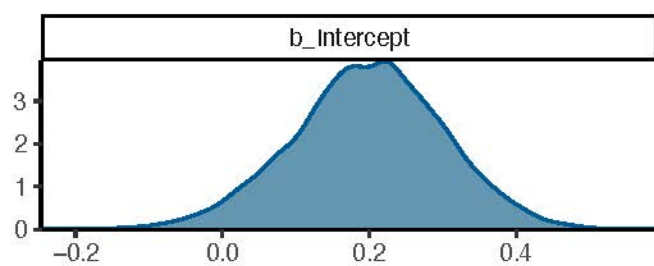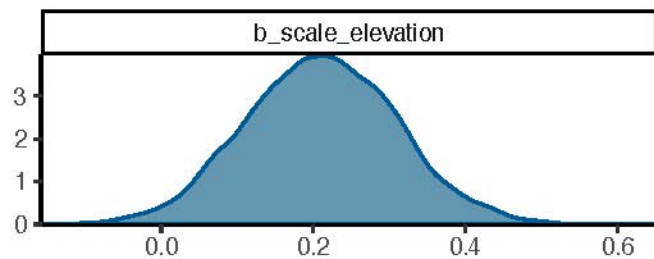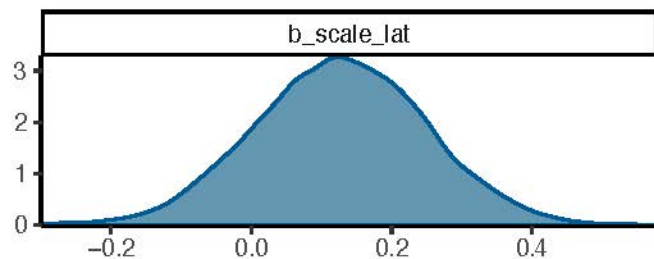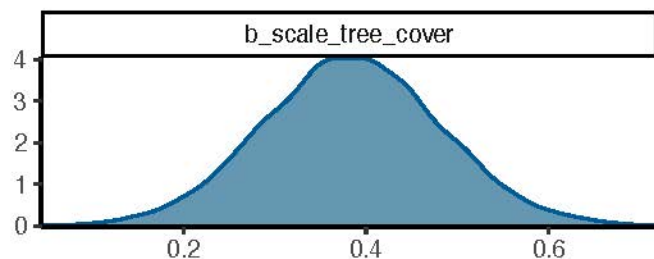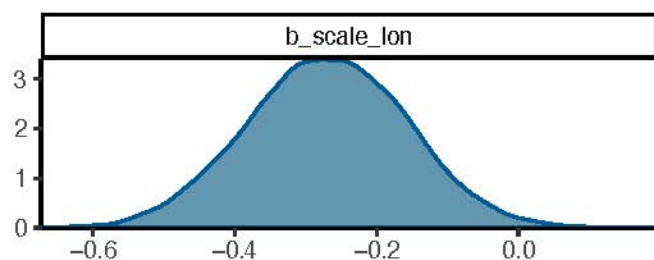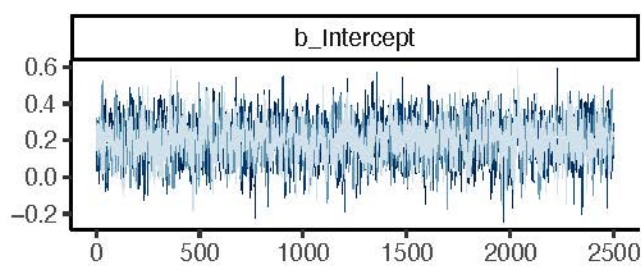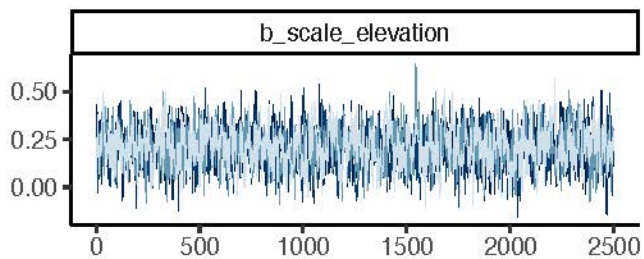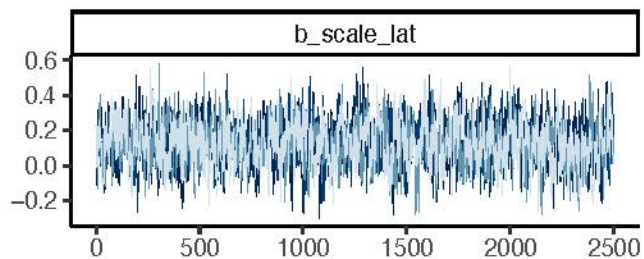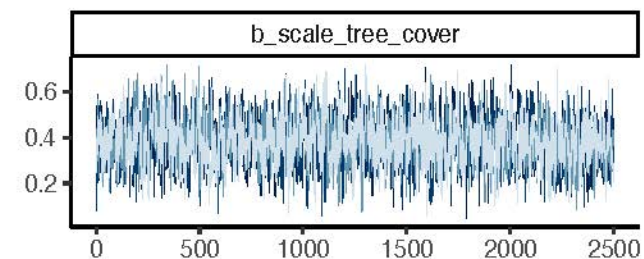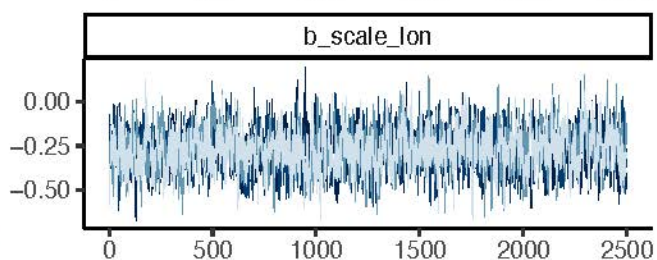

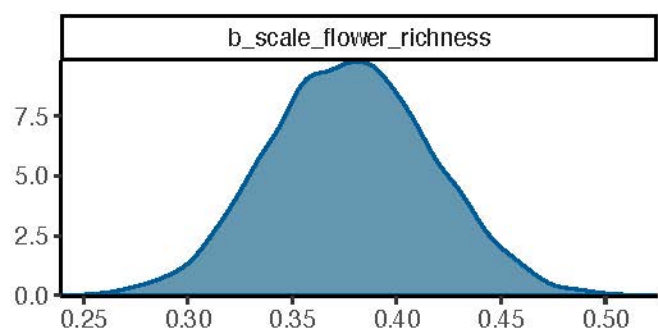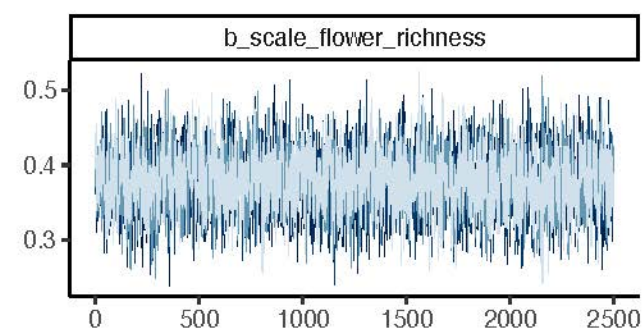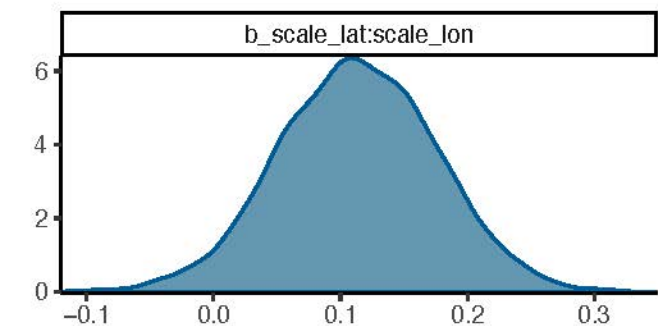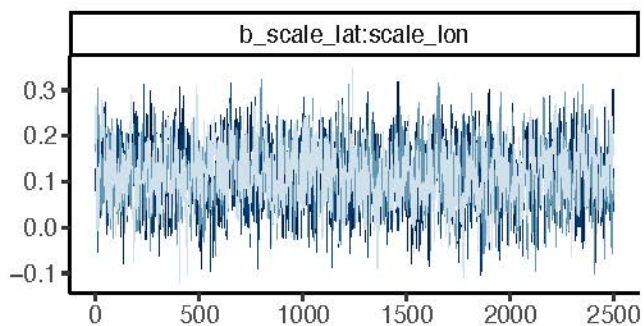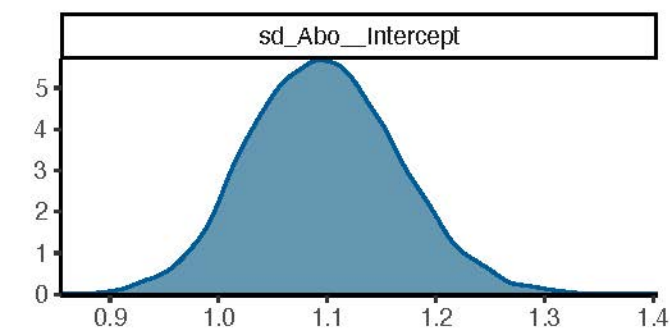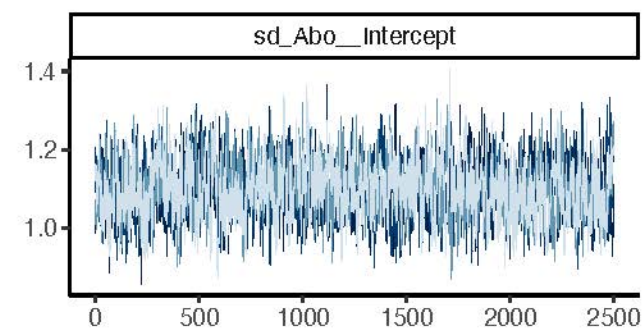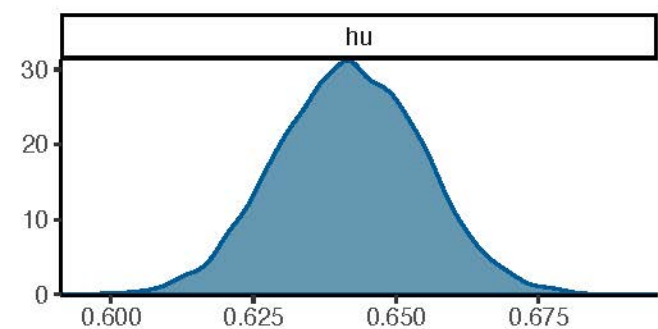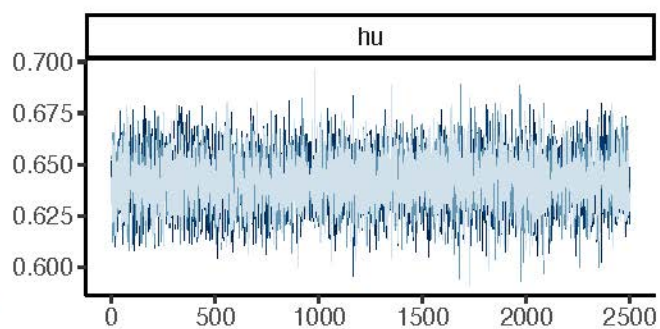

*pratorum*

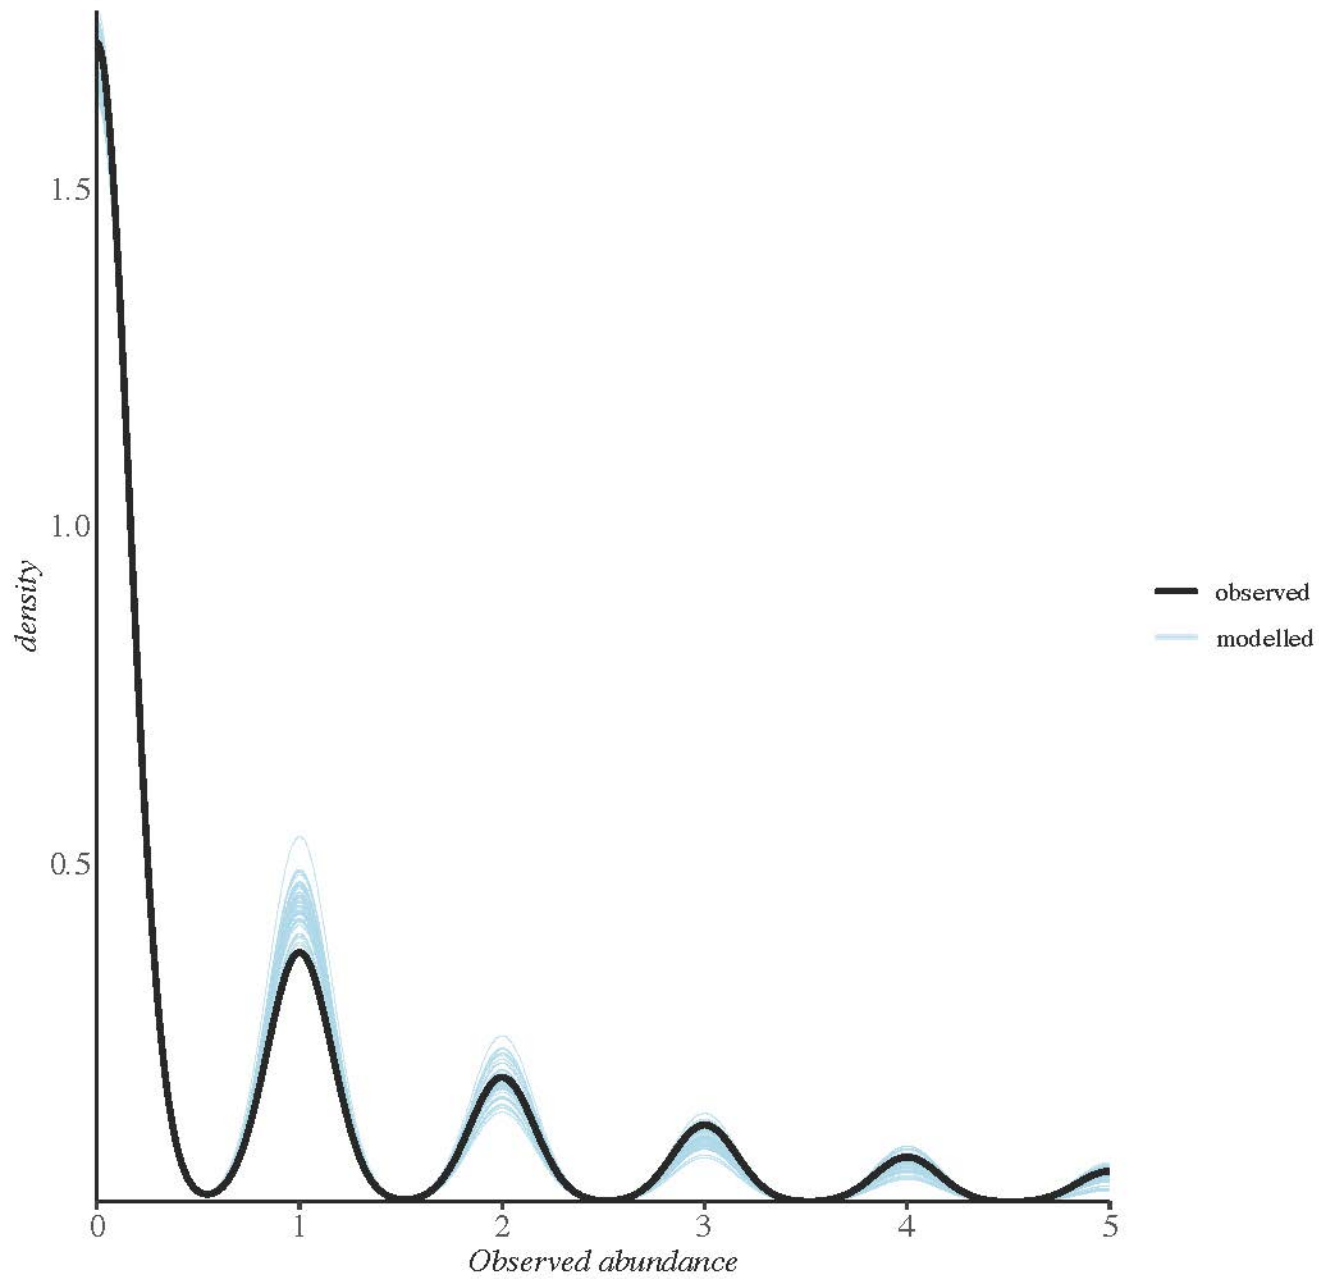

lucorum

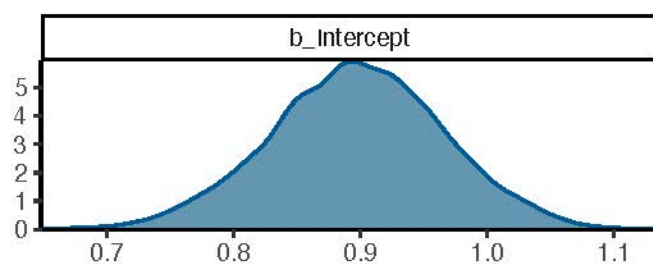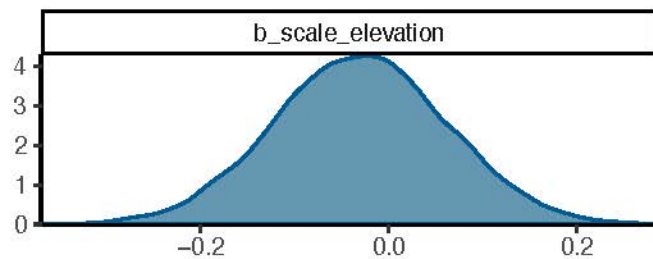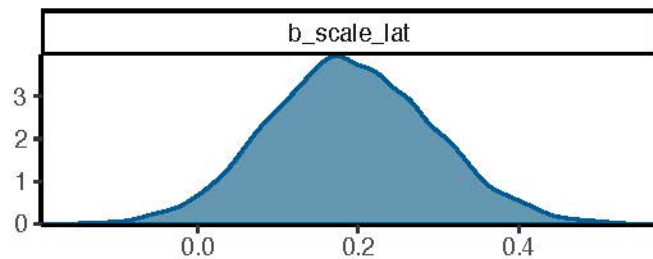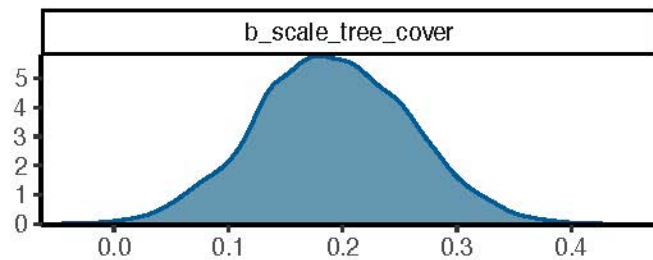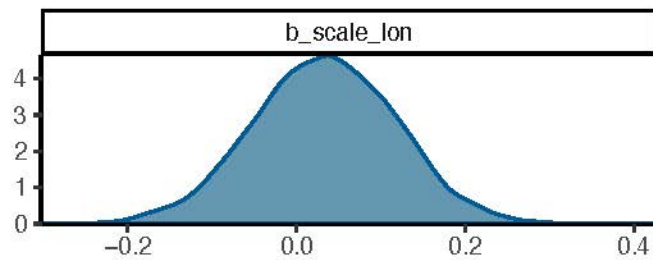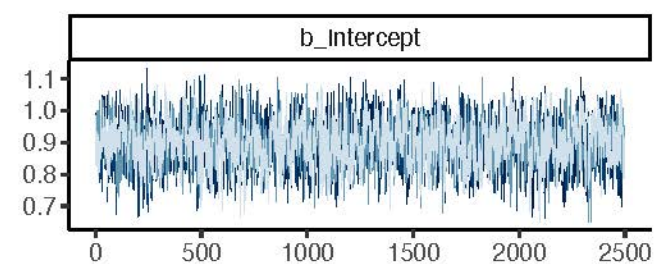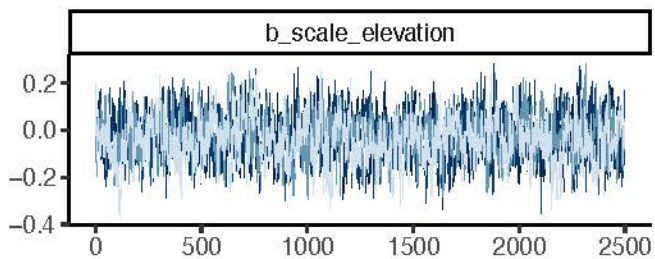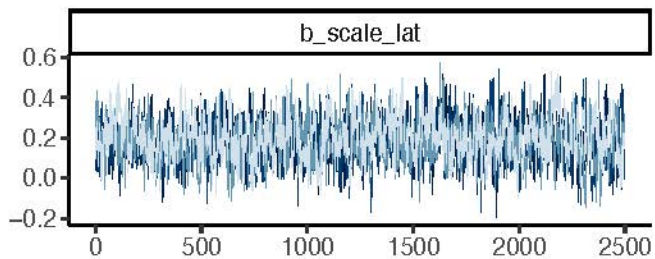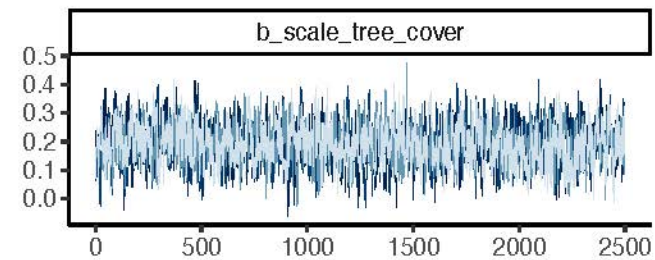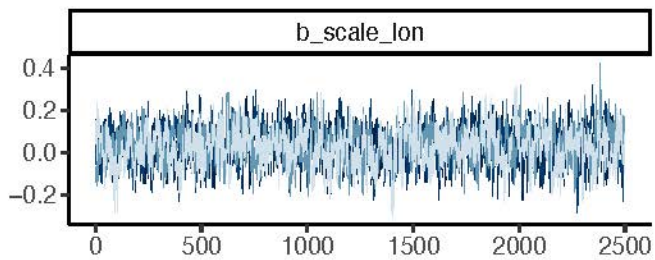



b\_scale\_flower\_richness

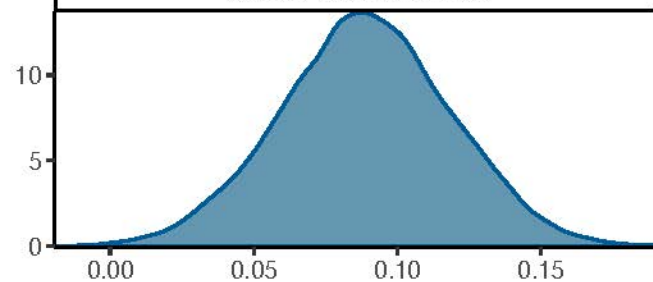

b\_scale\_flower\_richness

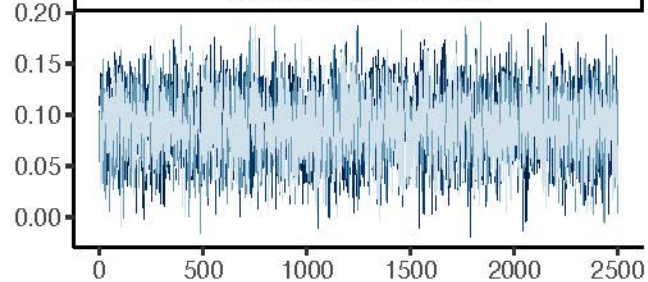

b\_scale\_lat:scale\_lon

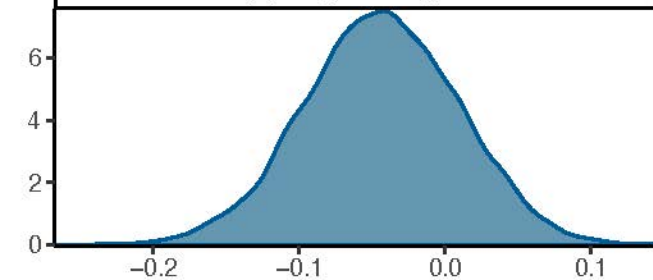

b\_scale\_lat:scale\_lon

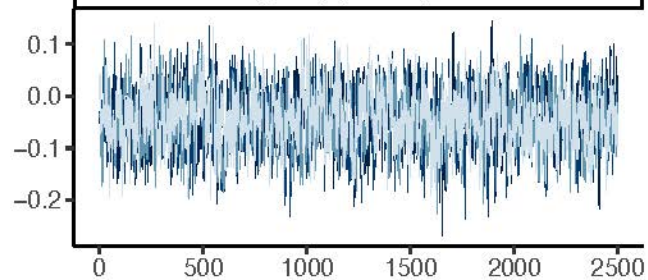

sd\_Abo\_\_Intercept

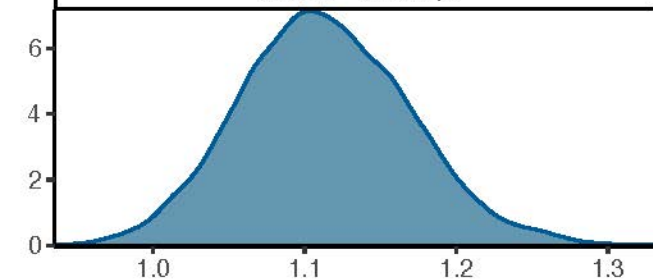

sd\_Abo\_\_Intercept

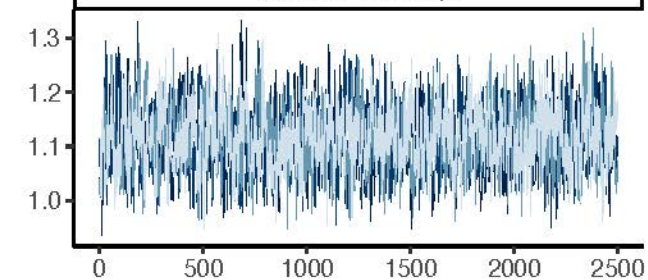

hu

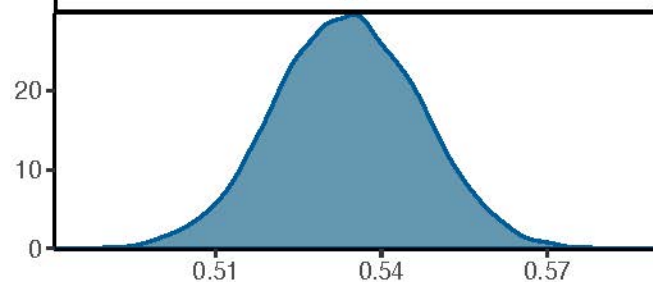

hu

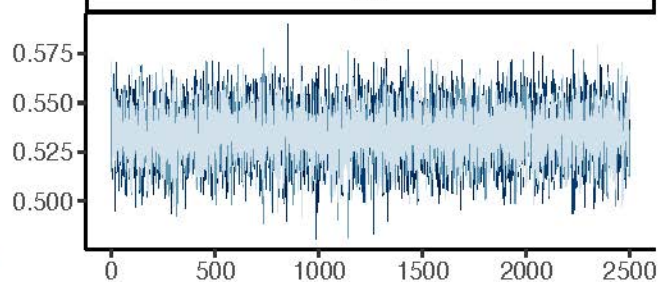



*lucorum*

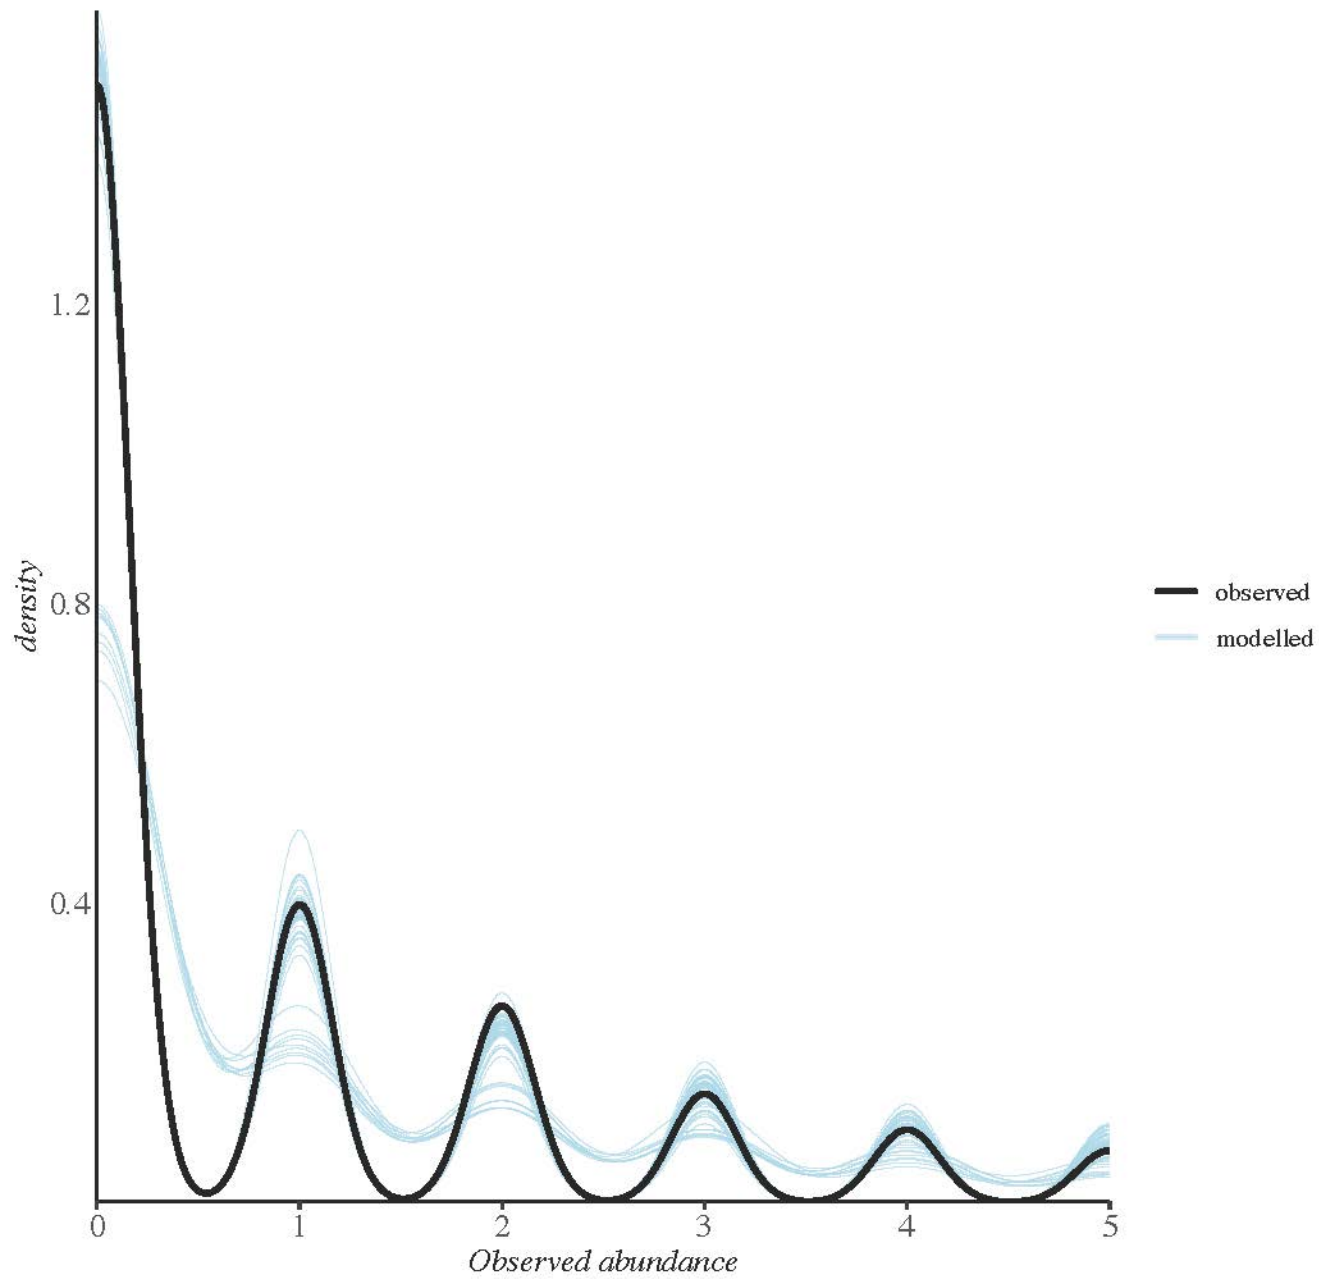

pascuorum

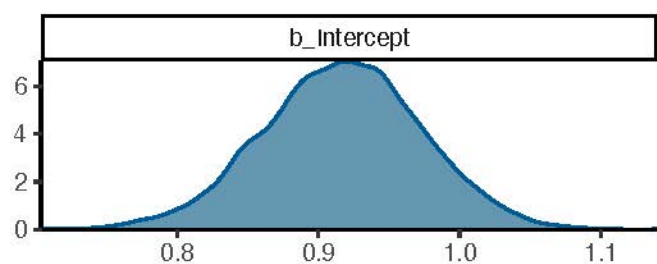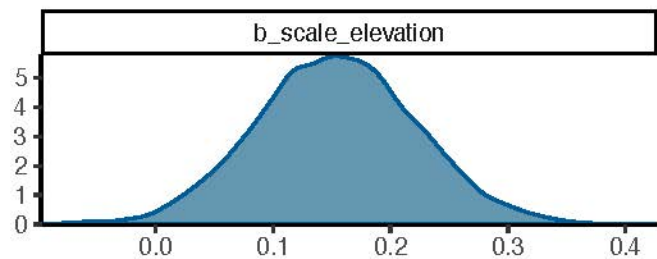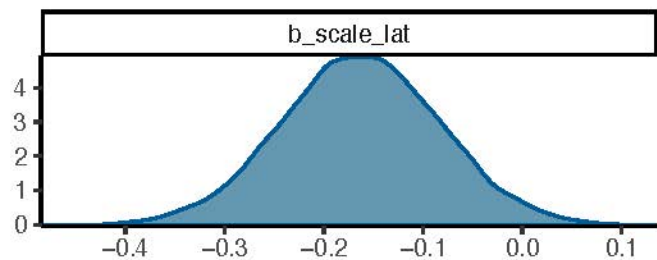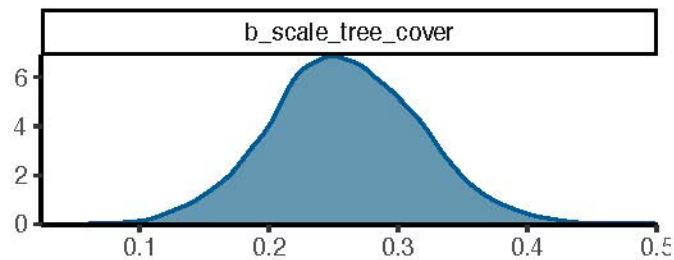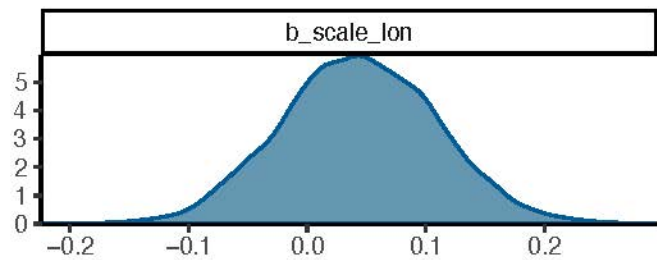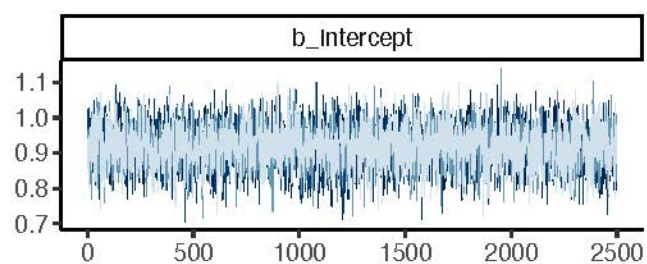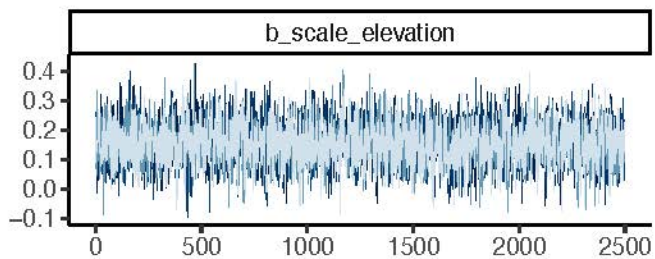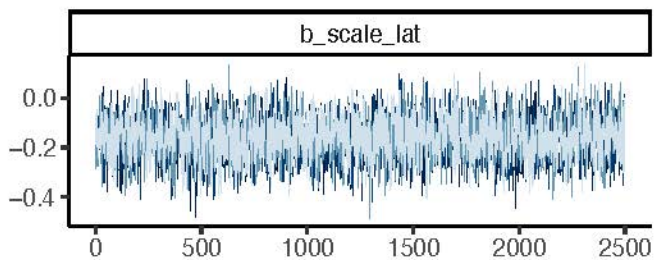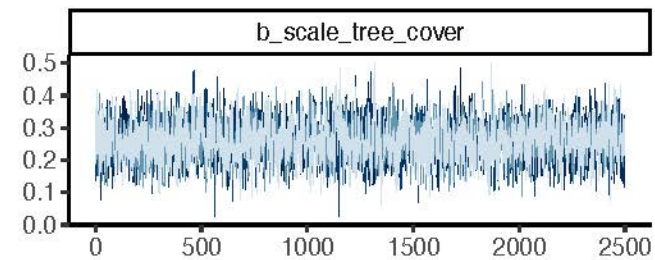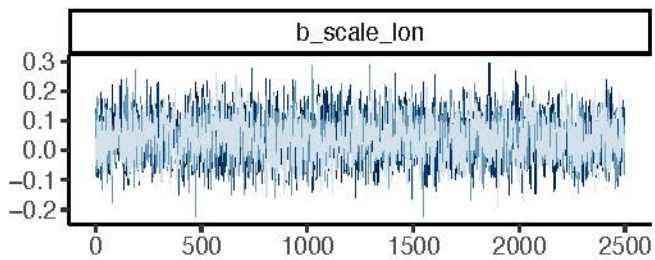

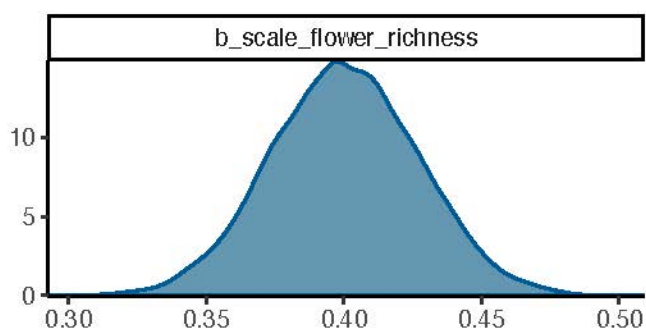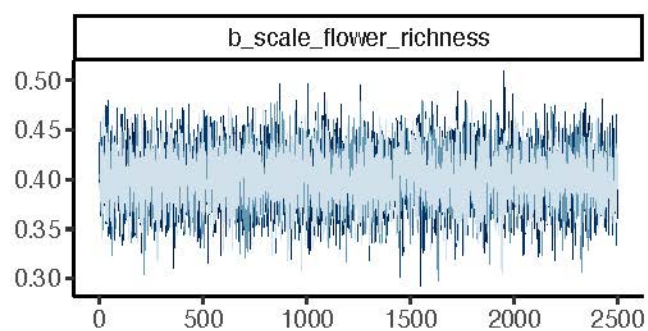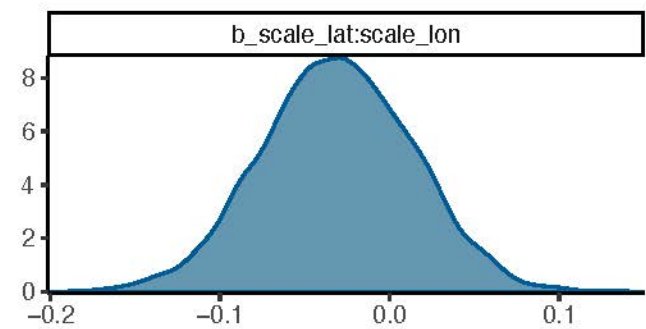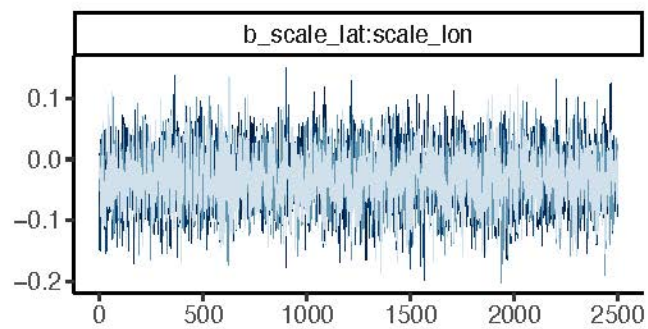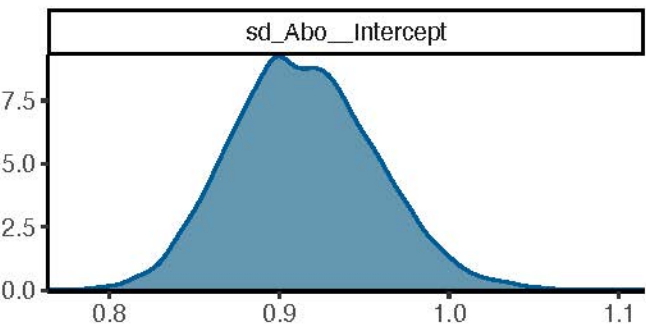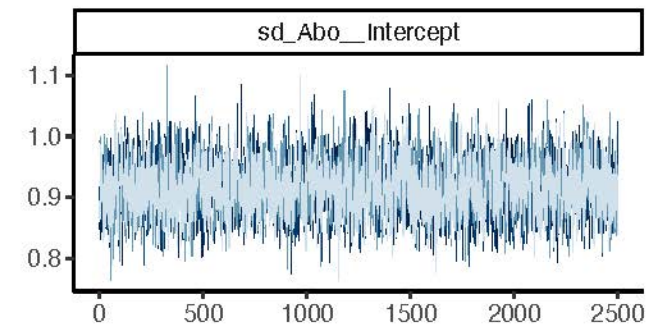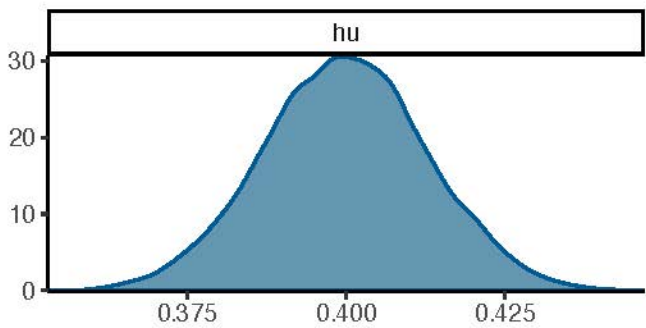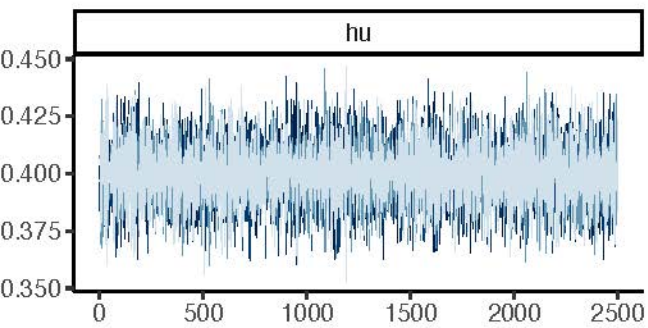

*pascuorum*

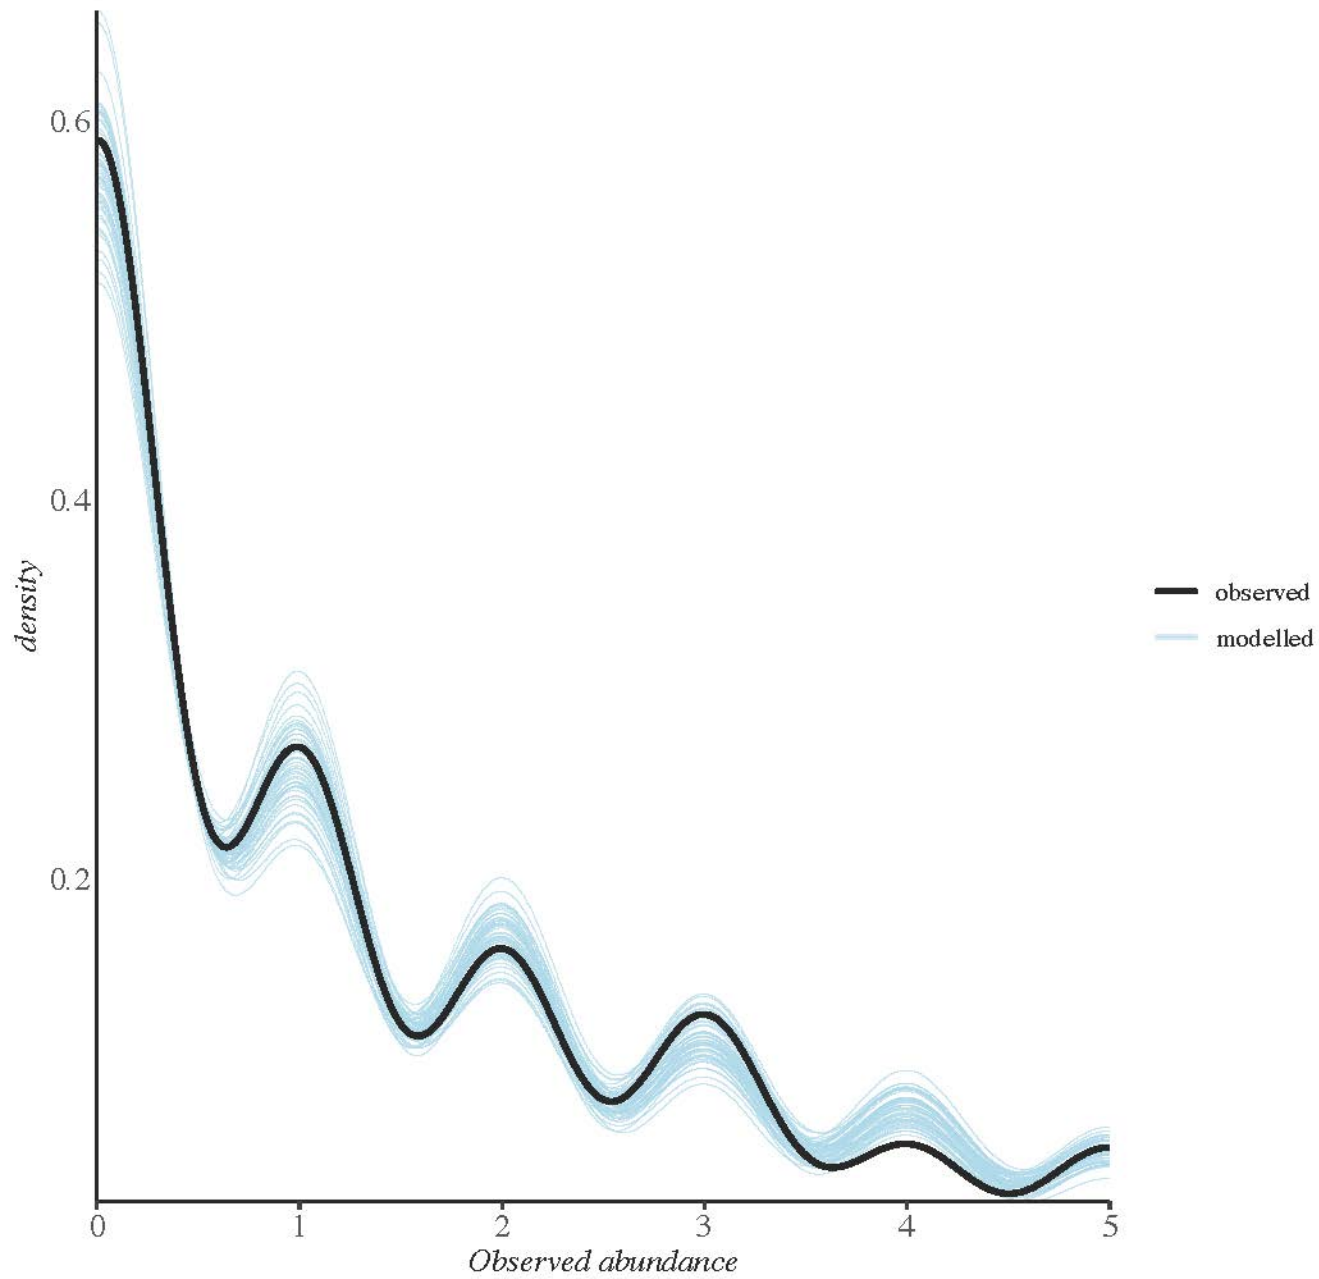

**Effects of tree cover on the community weighted means of visual traits relative to body size in bumblebee communities within grasslands across Sweden.** Model traces and posterior predictive check for each visual trait modelled with Bayesian inference.

Eye surface ( $\mu\text{m}^2$ )



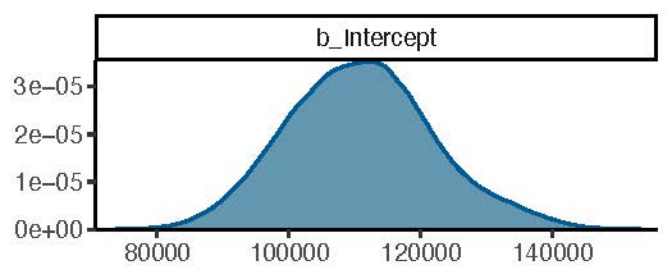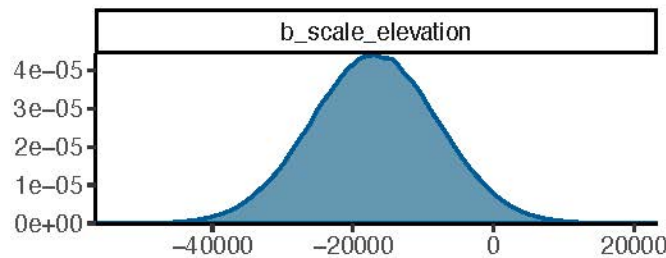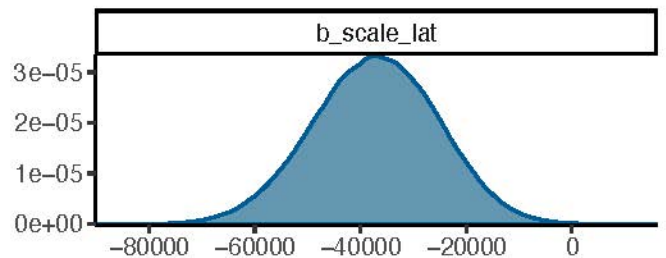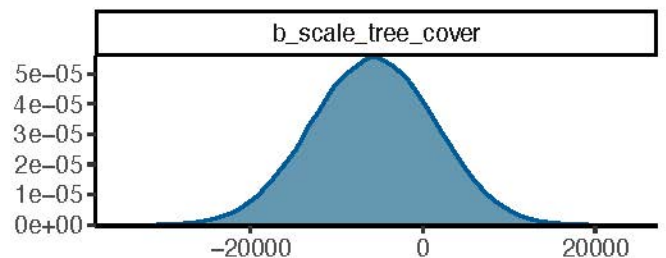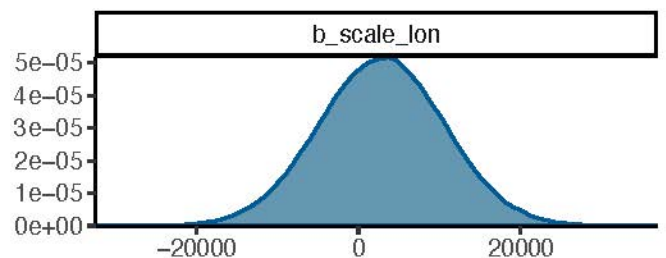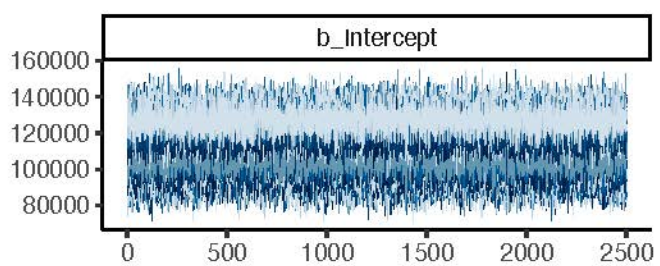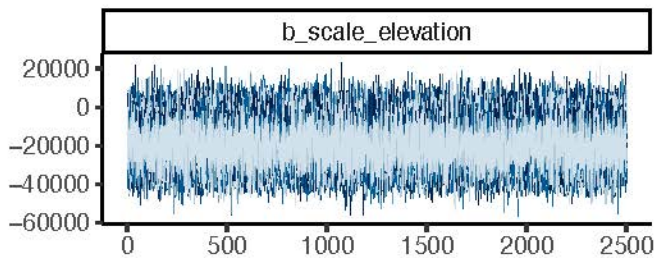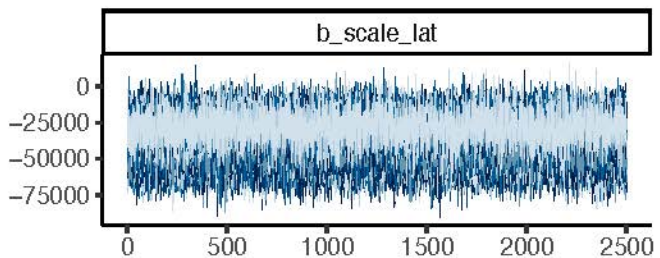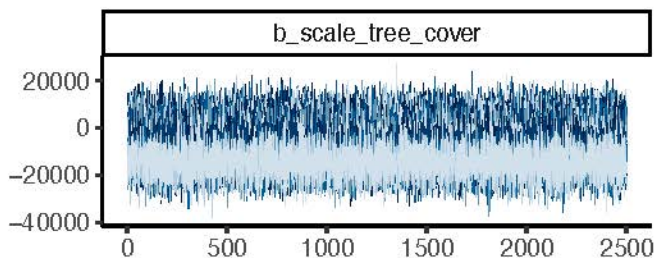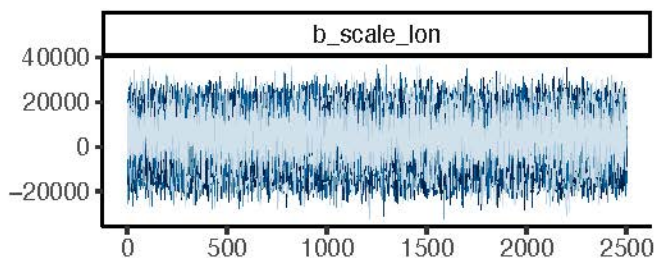

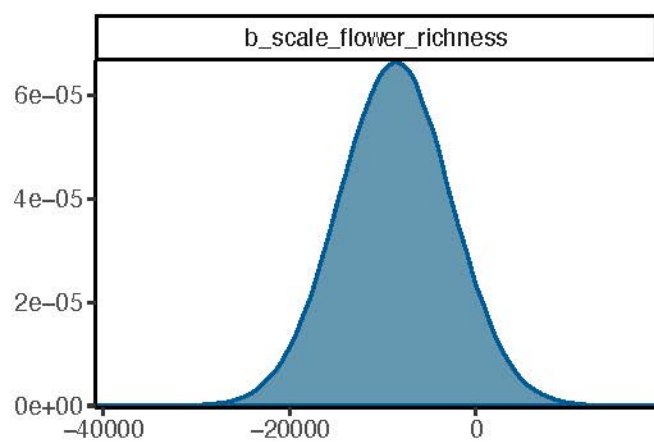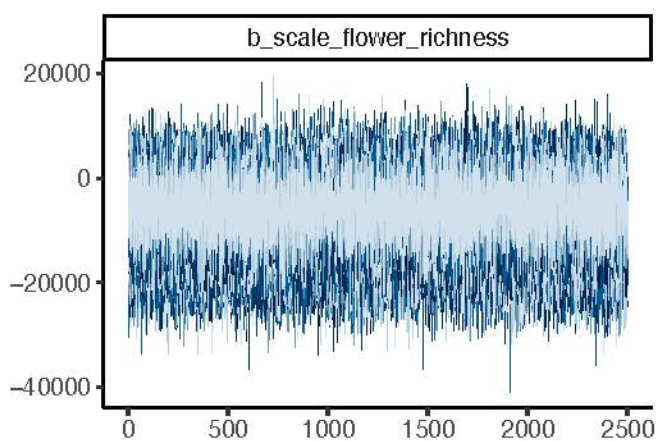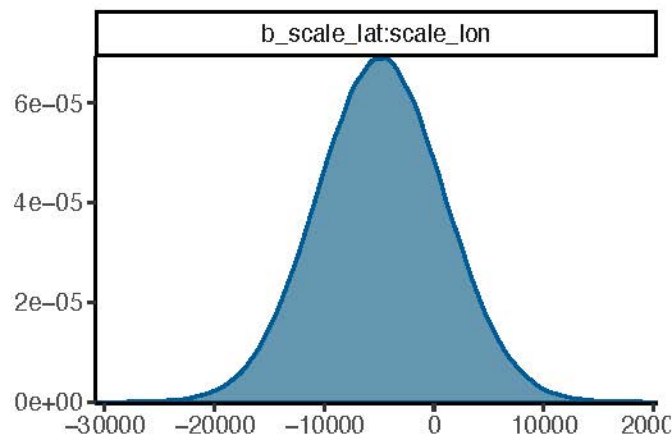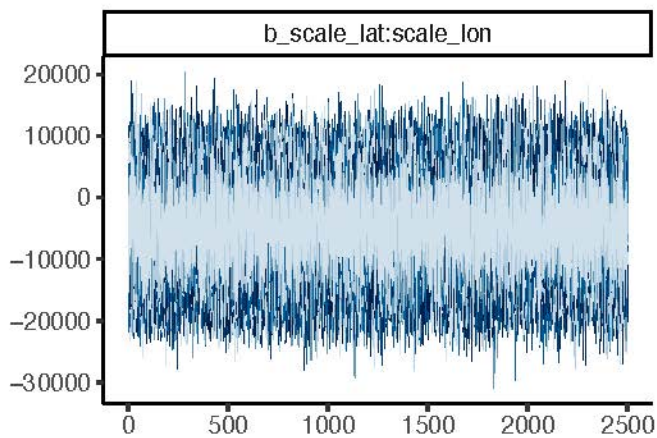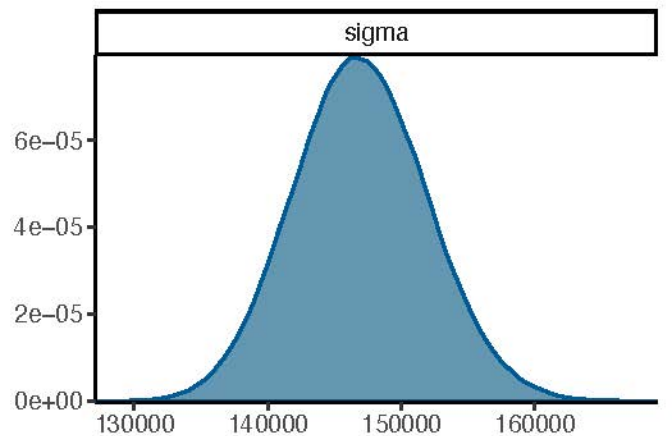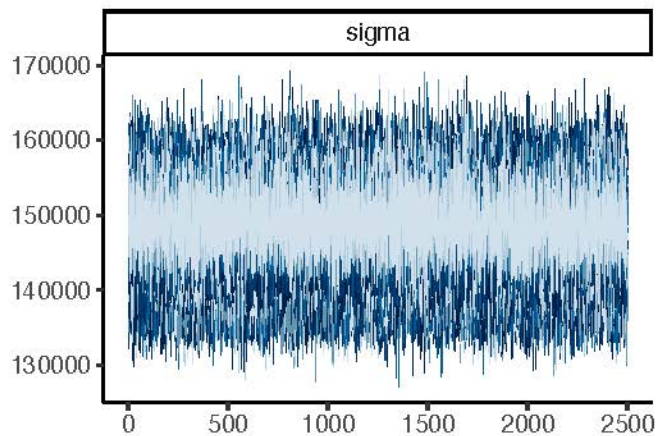

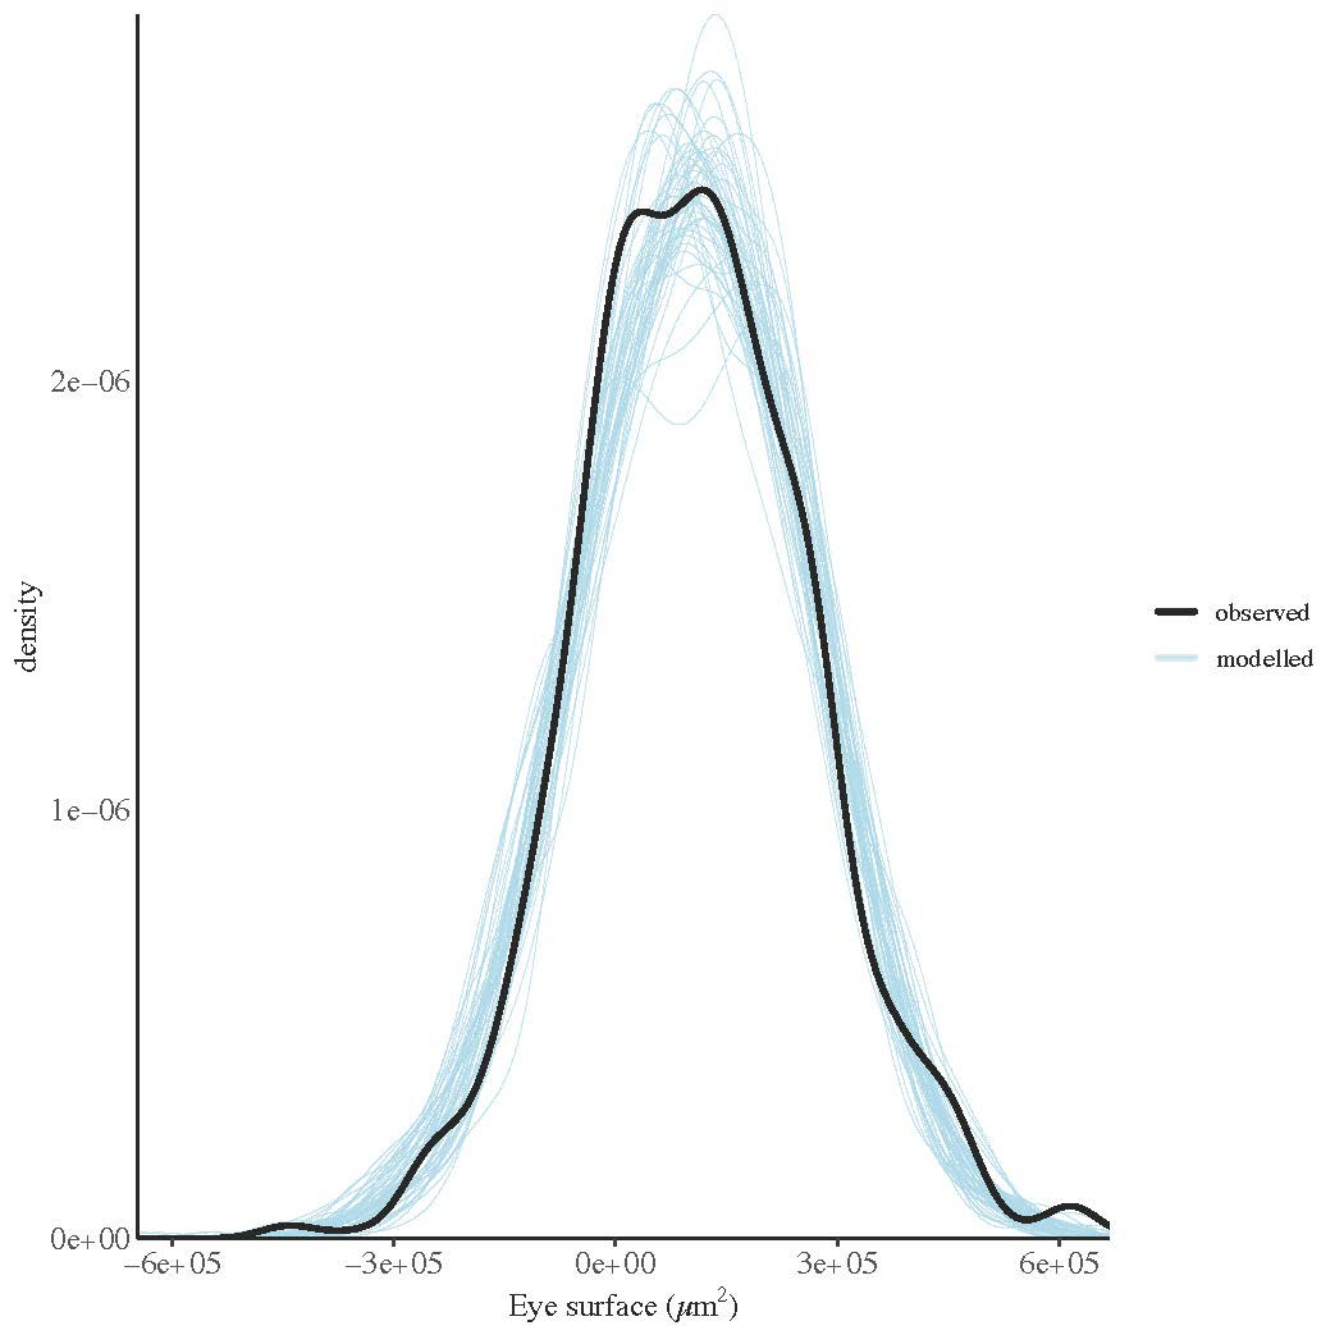

Facet diameter ( $\mu\text{m}$ )

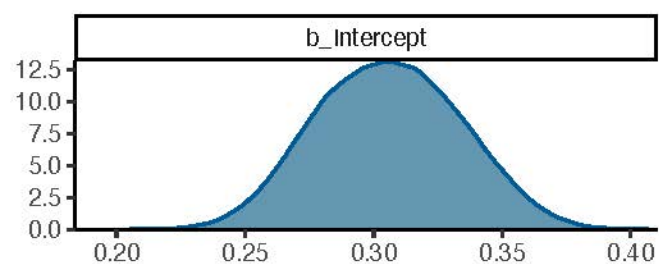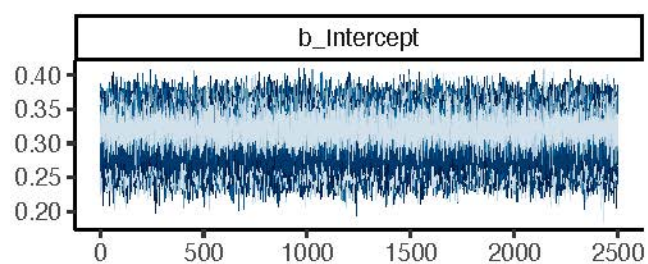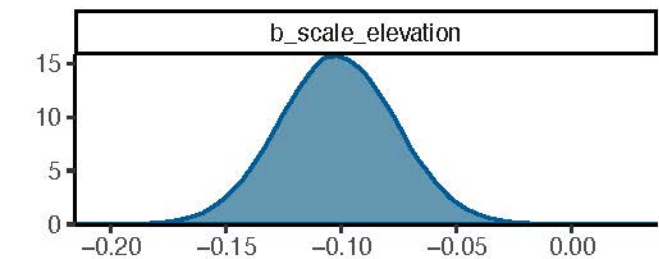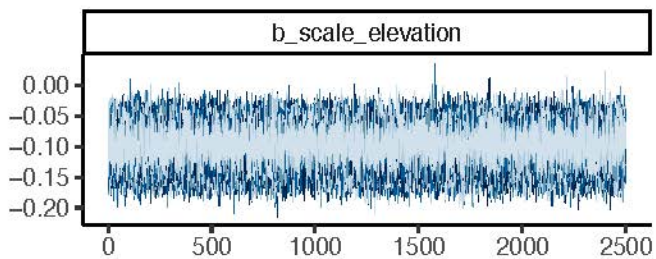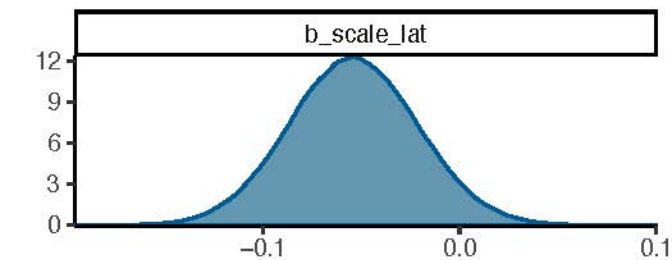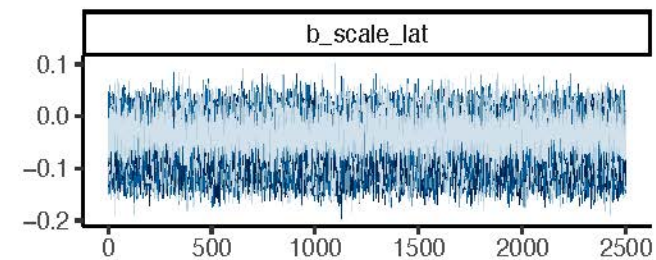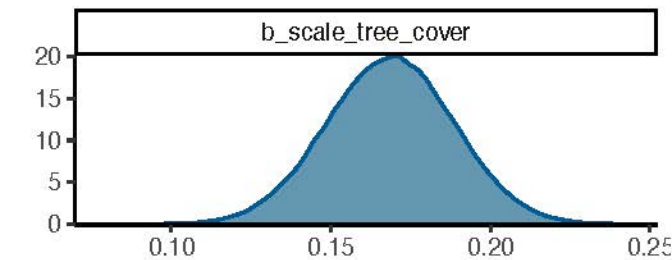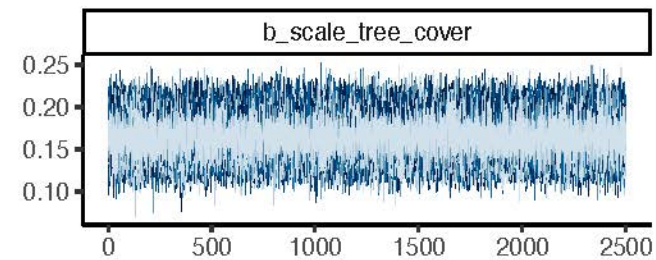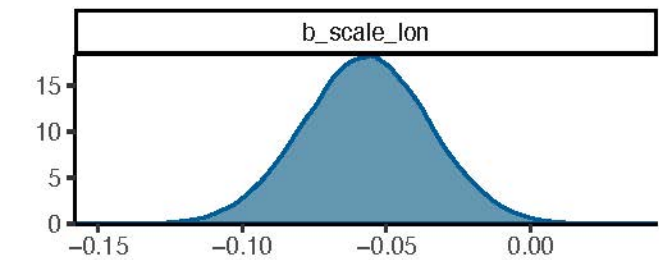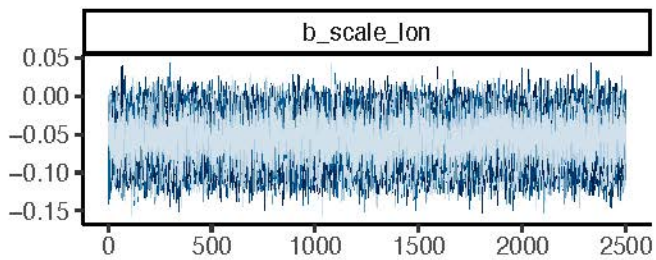



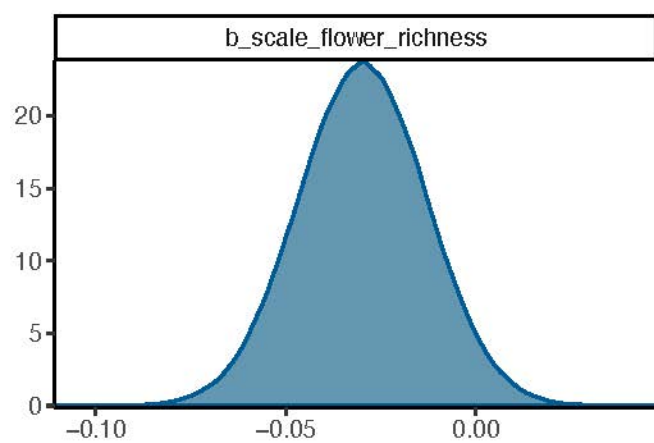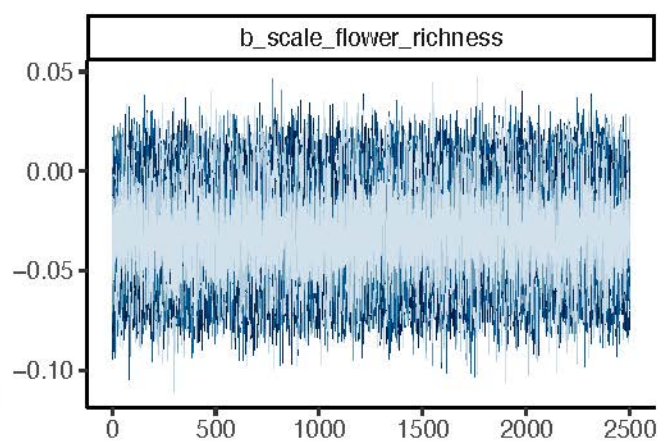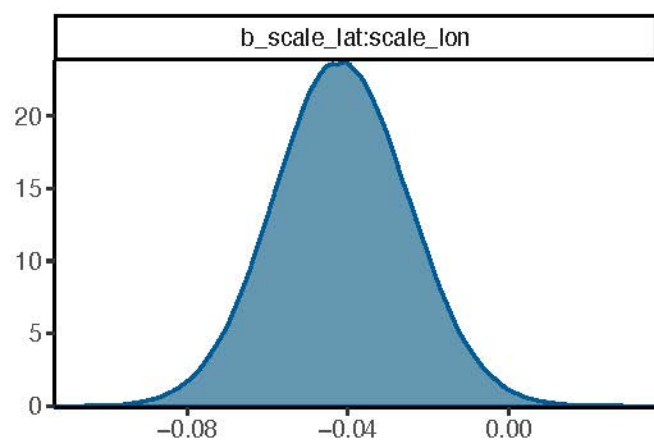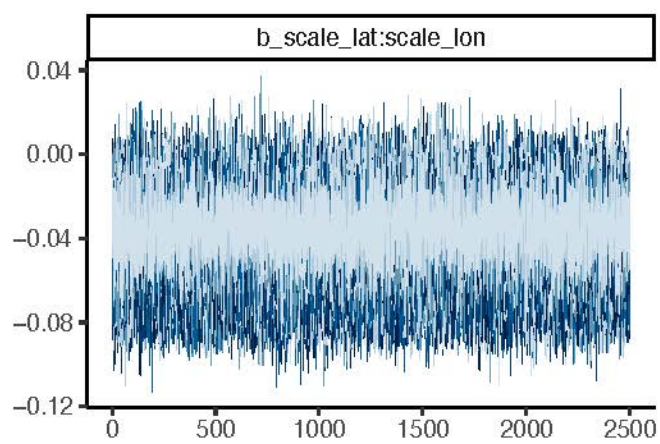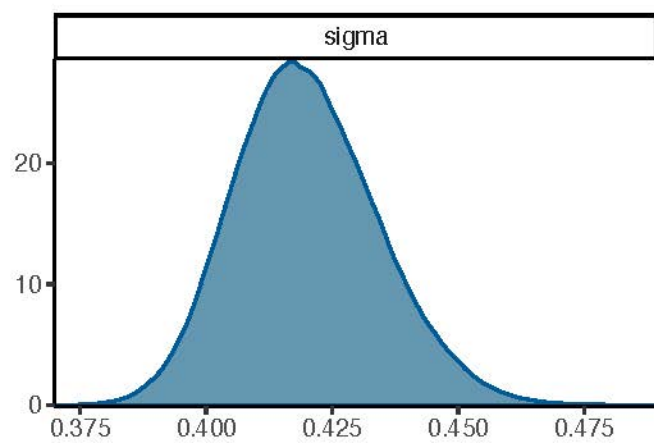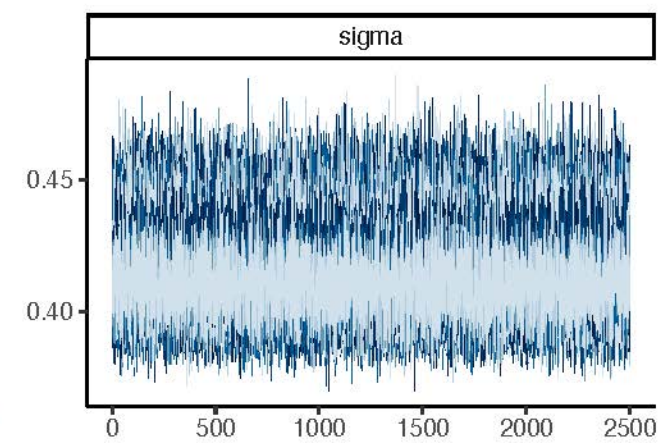

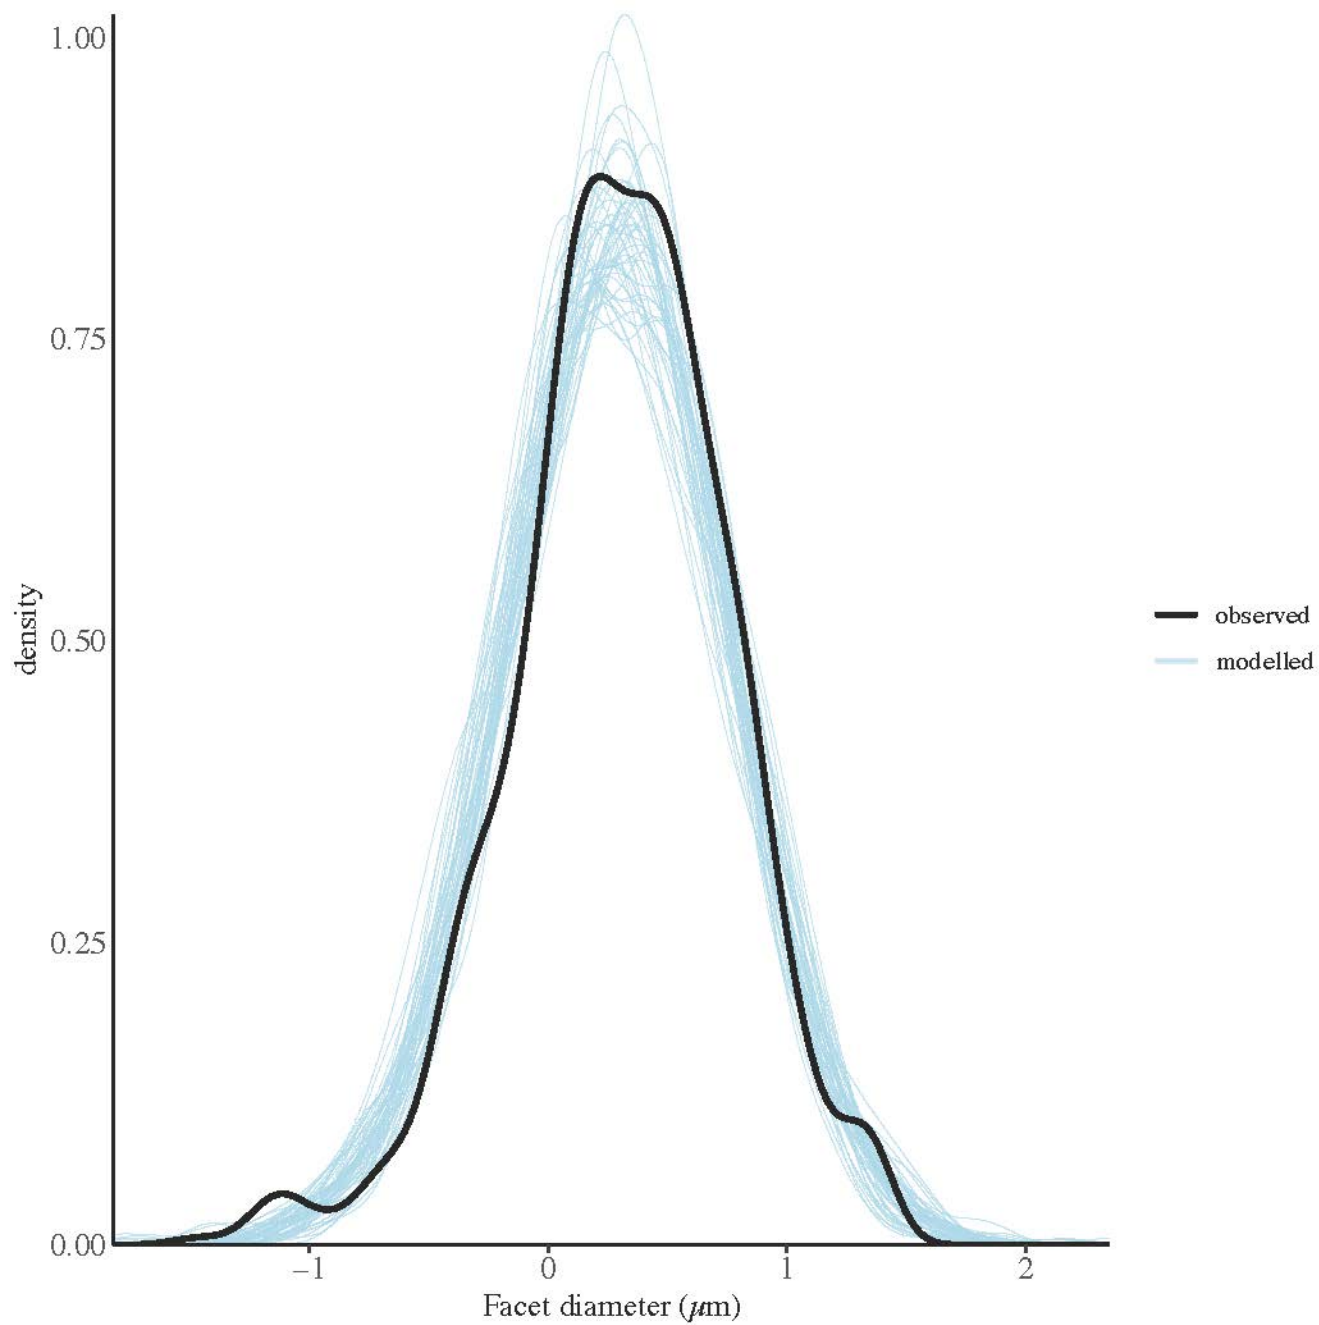



Inter-ommatidial angle (°)

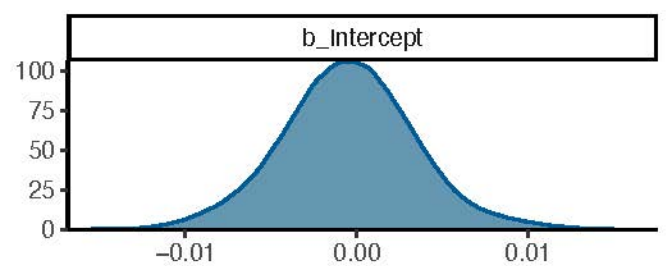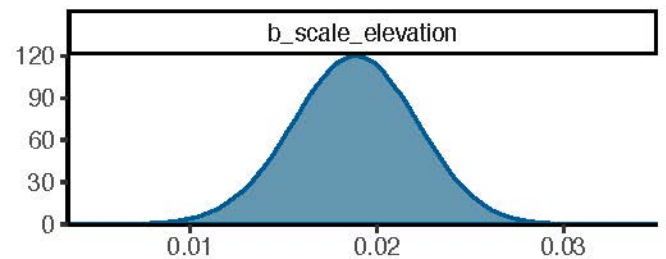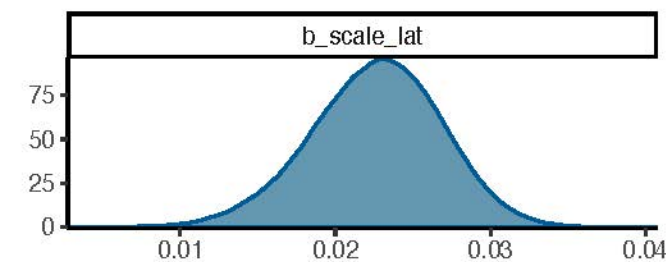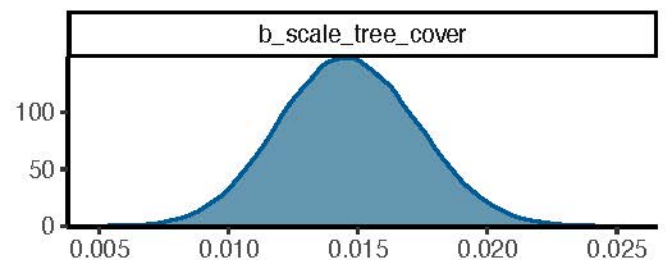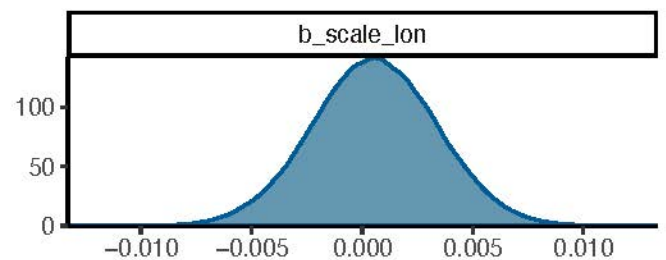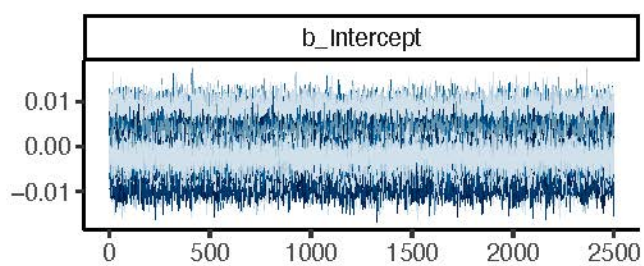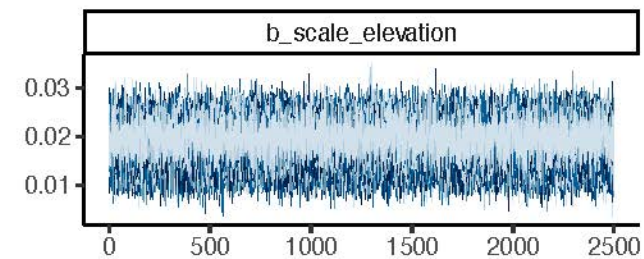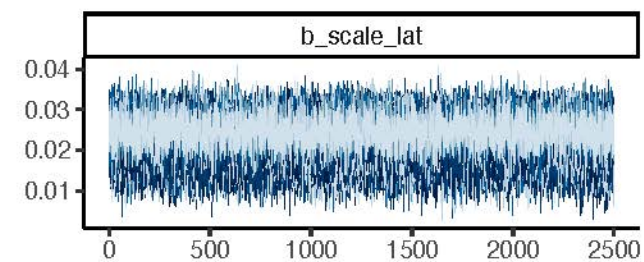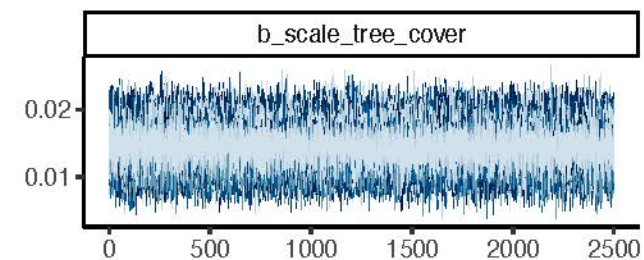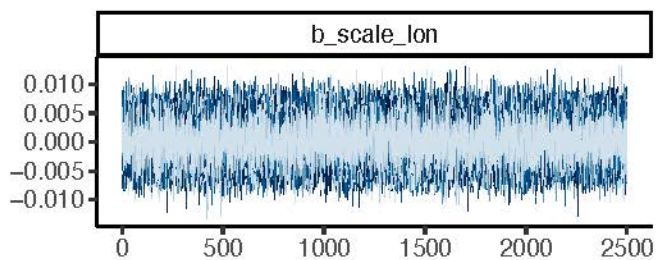

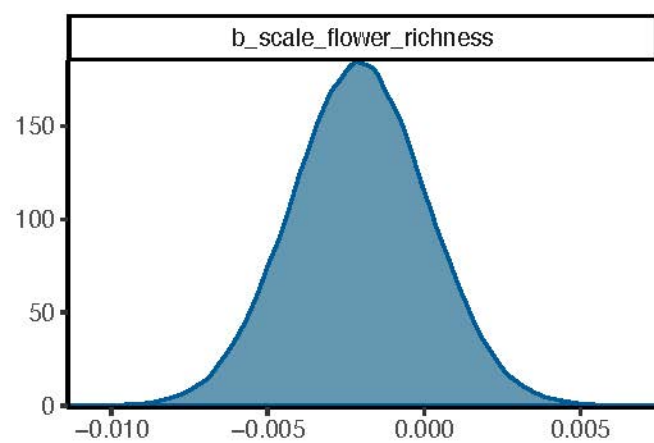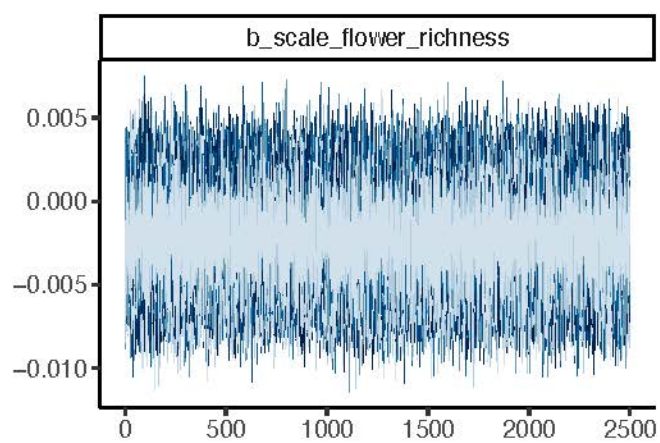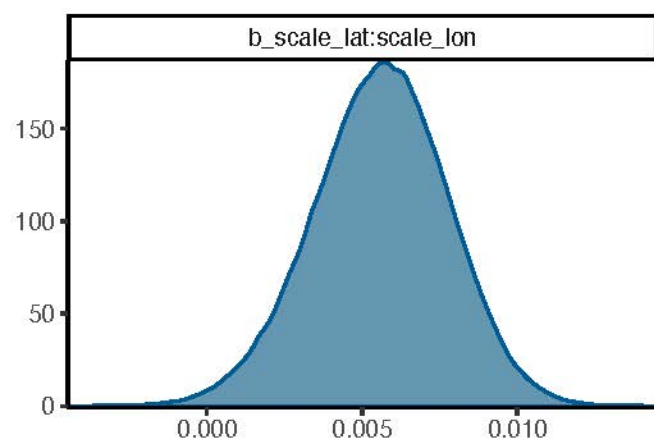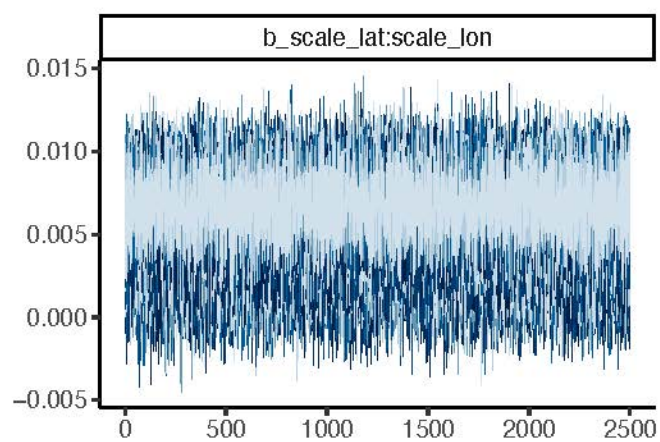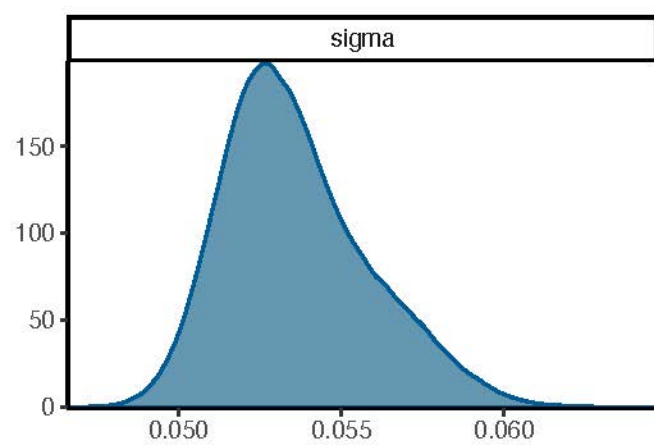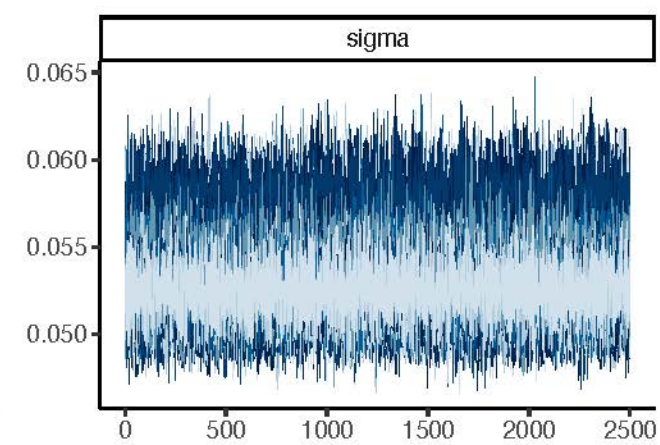

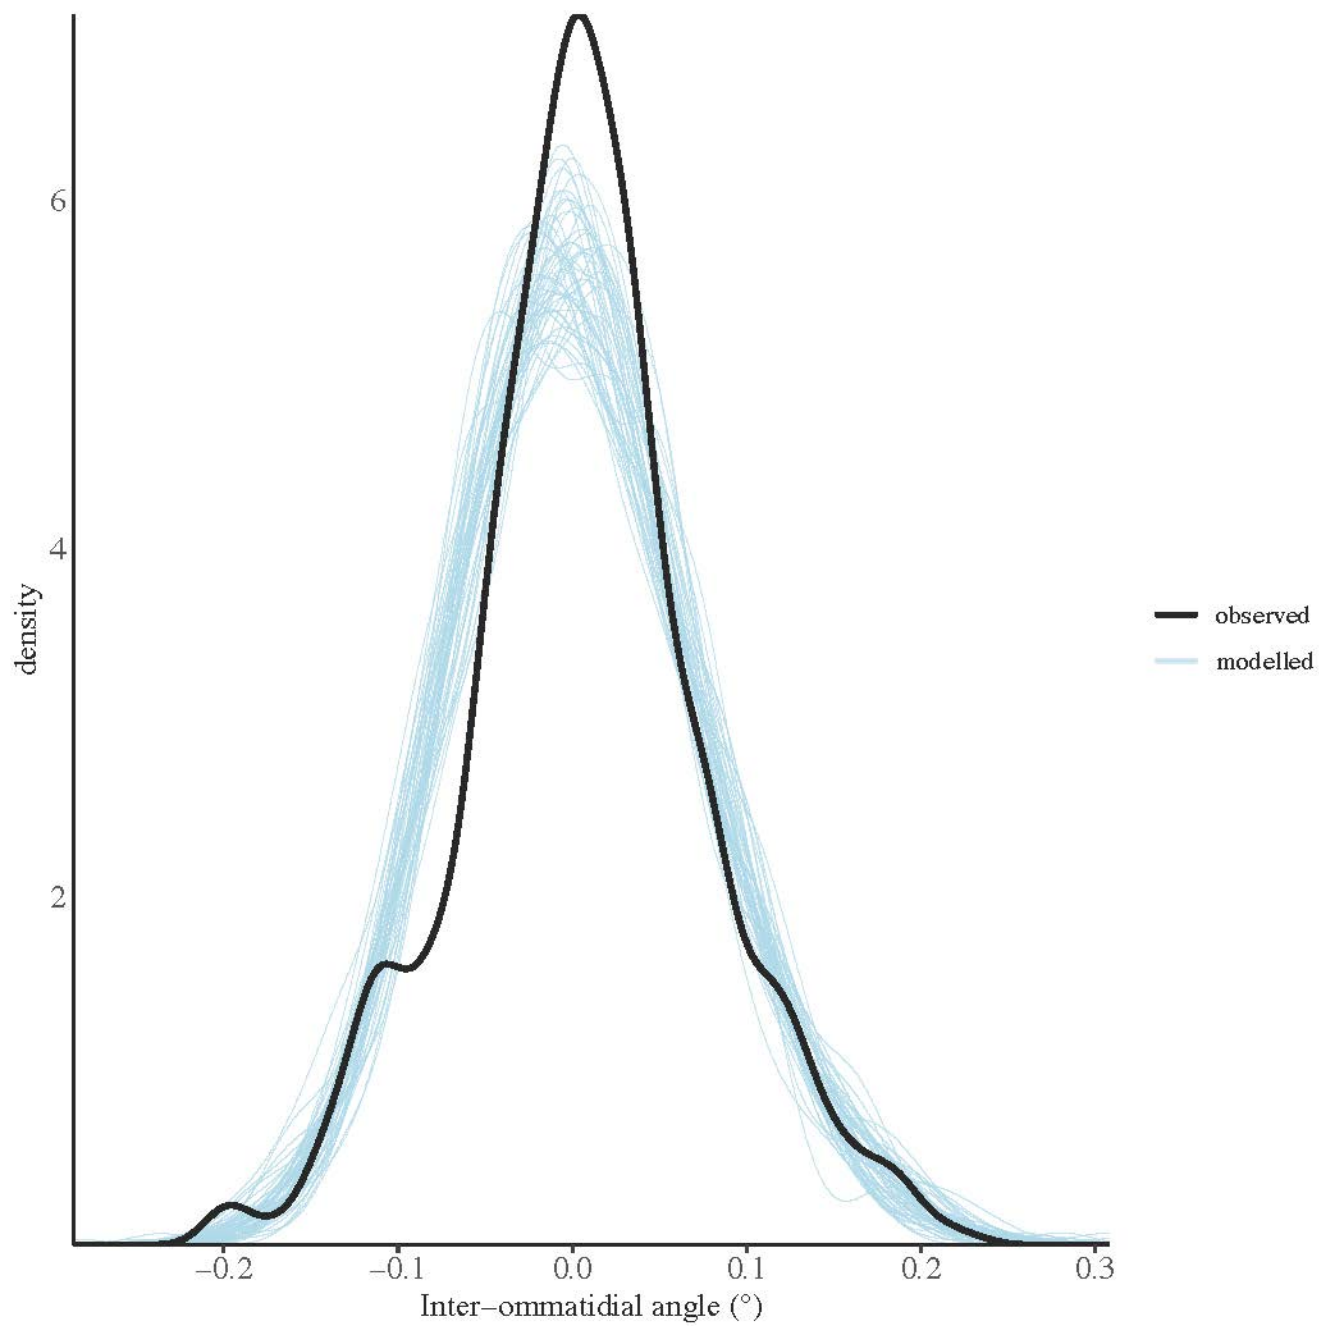

Facet number

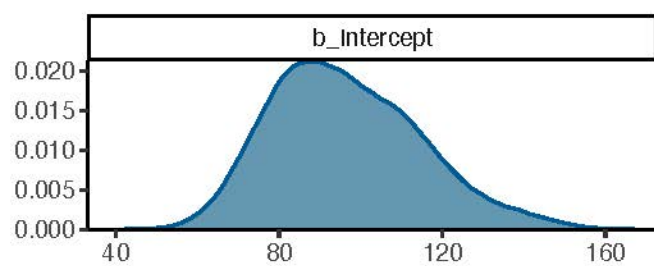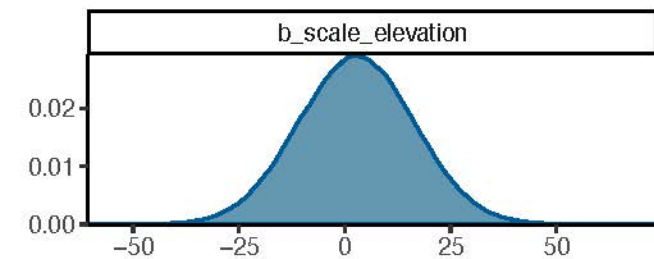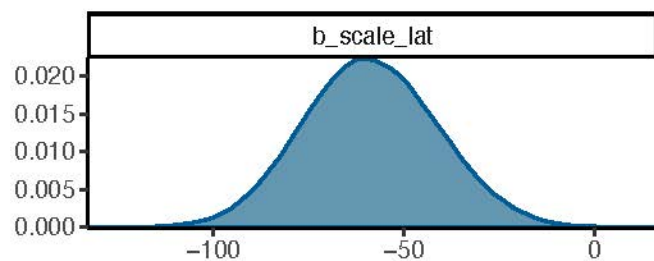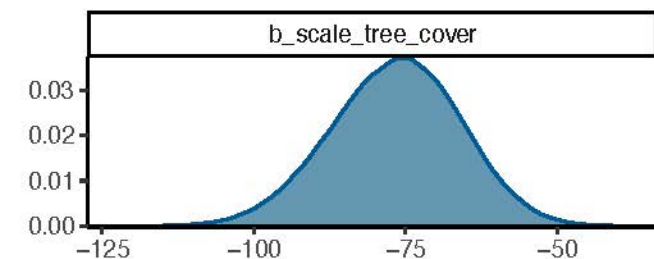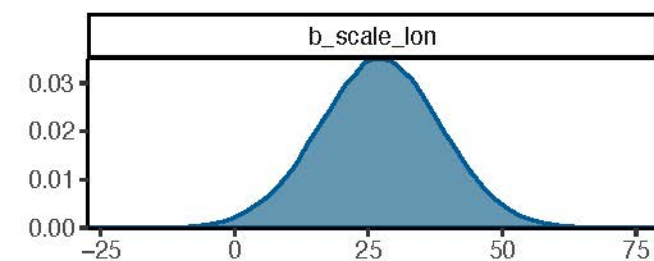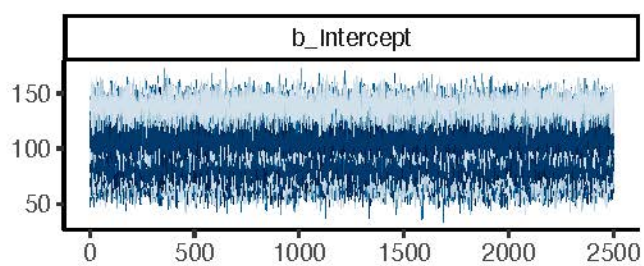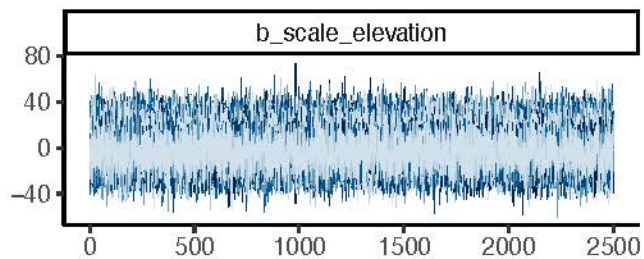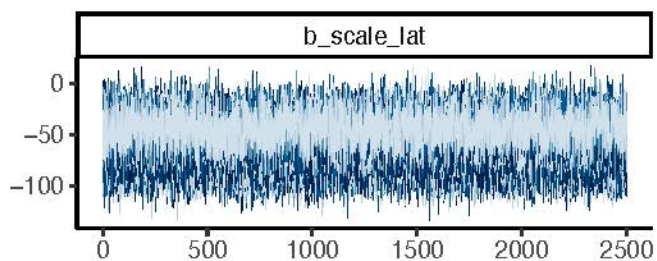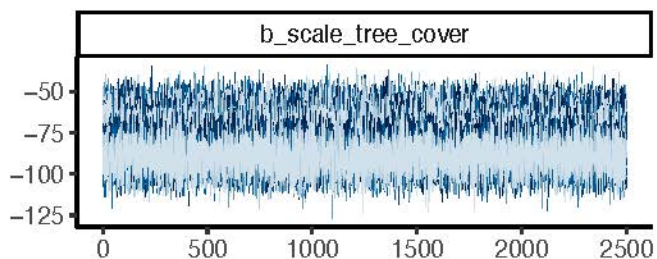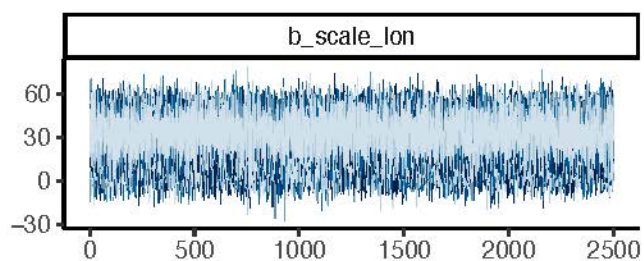



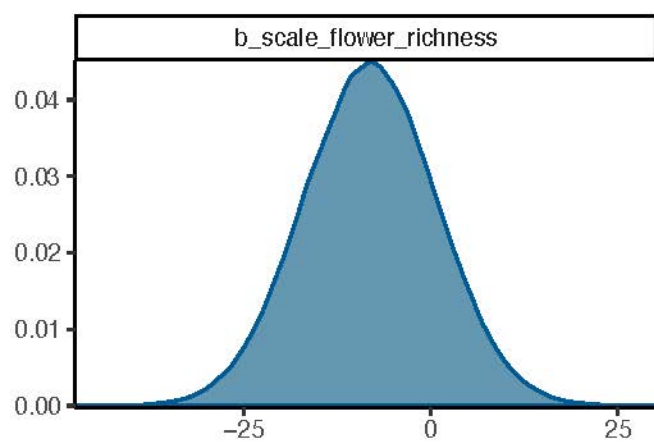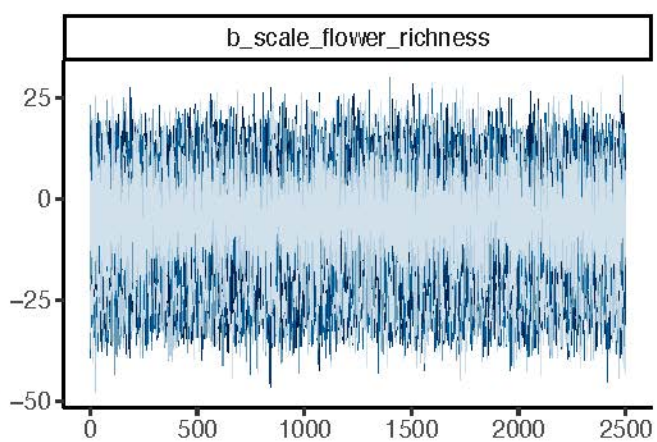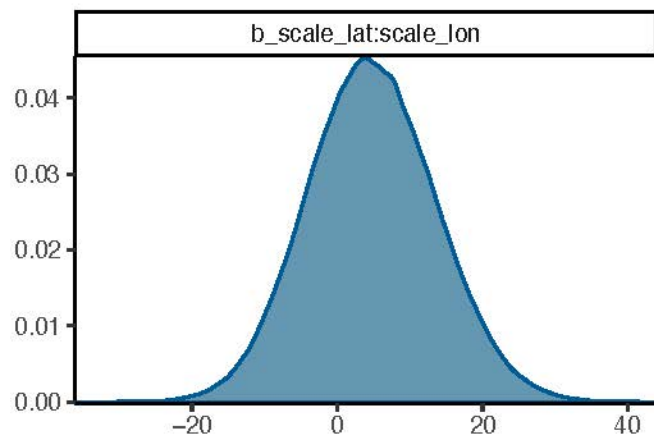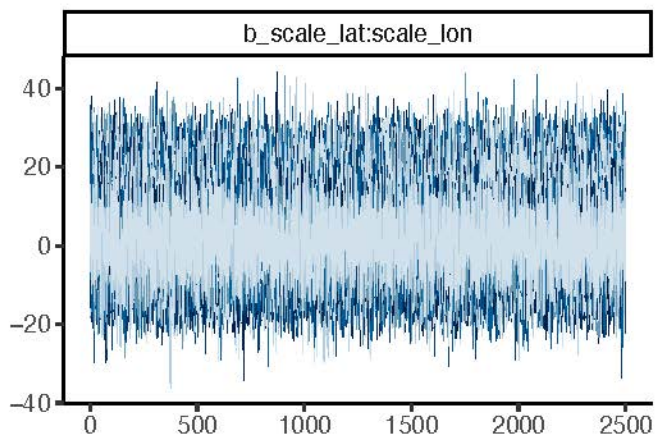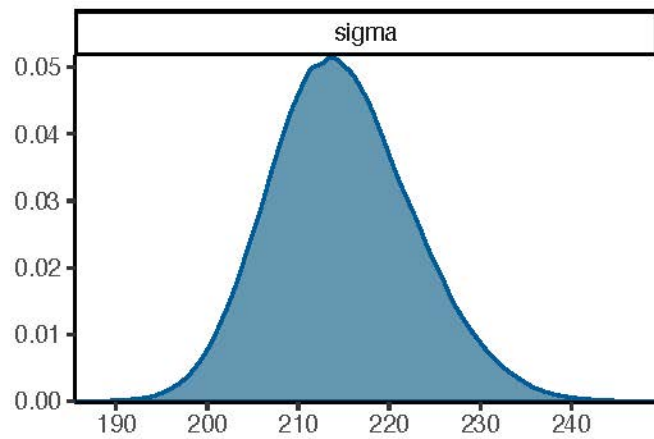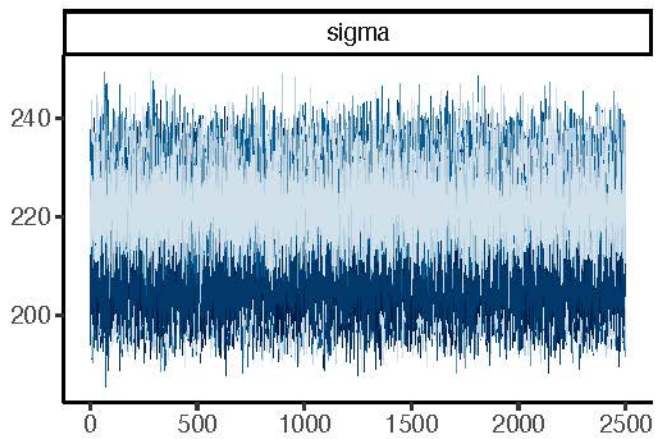



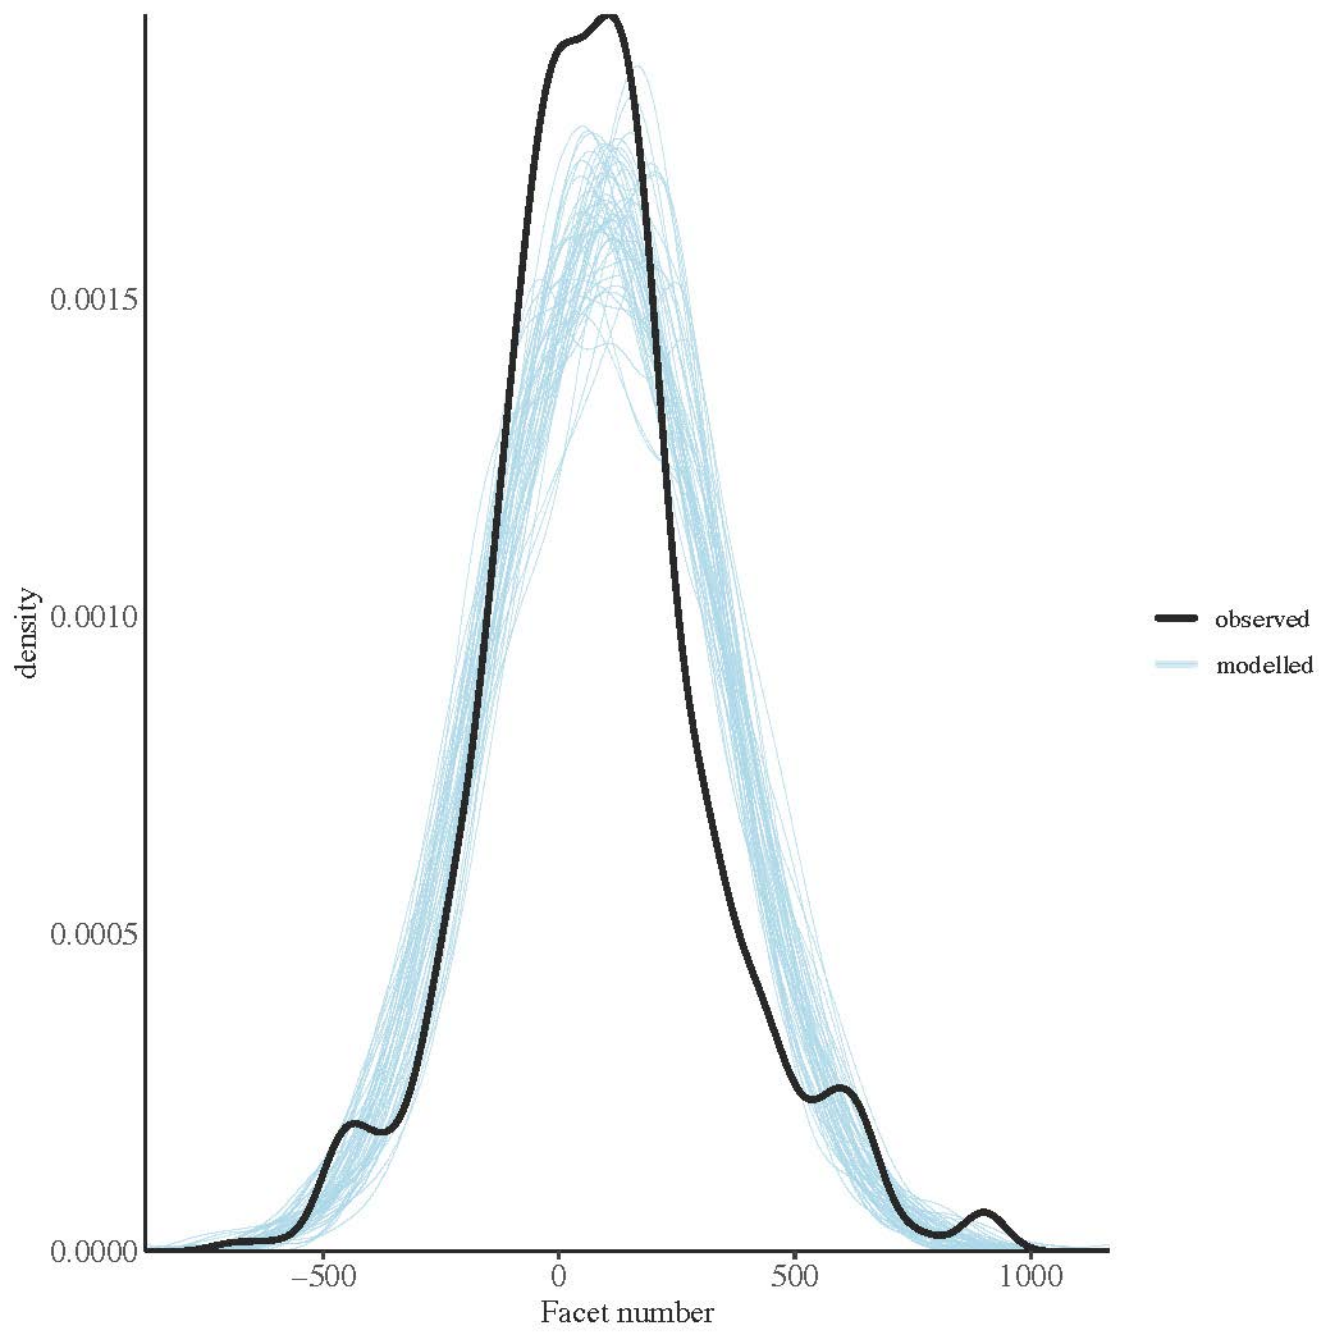

Eye parameter ( $\mu\text{m}\cdot\text{rad}$ )

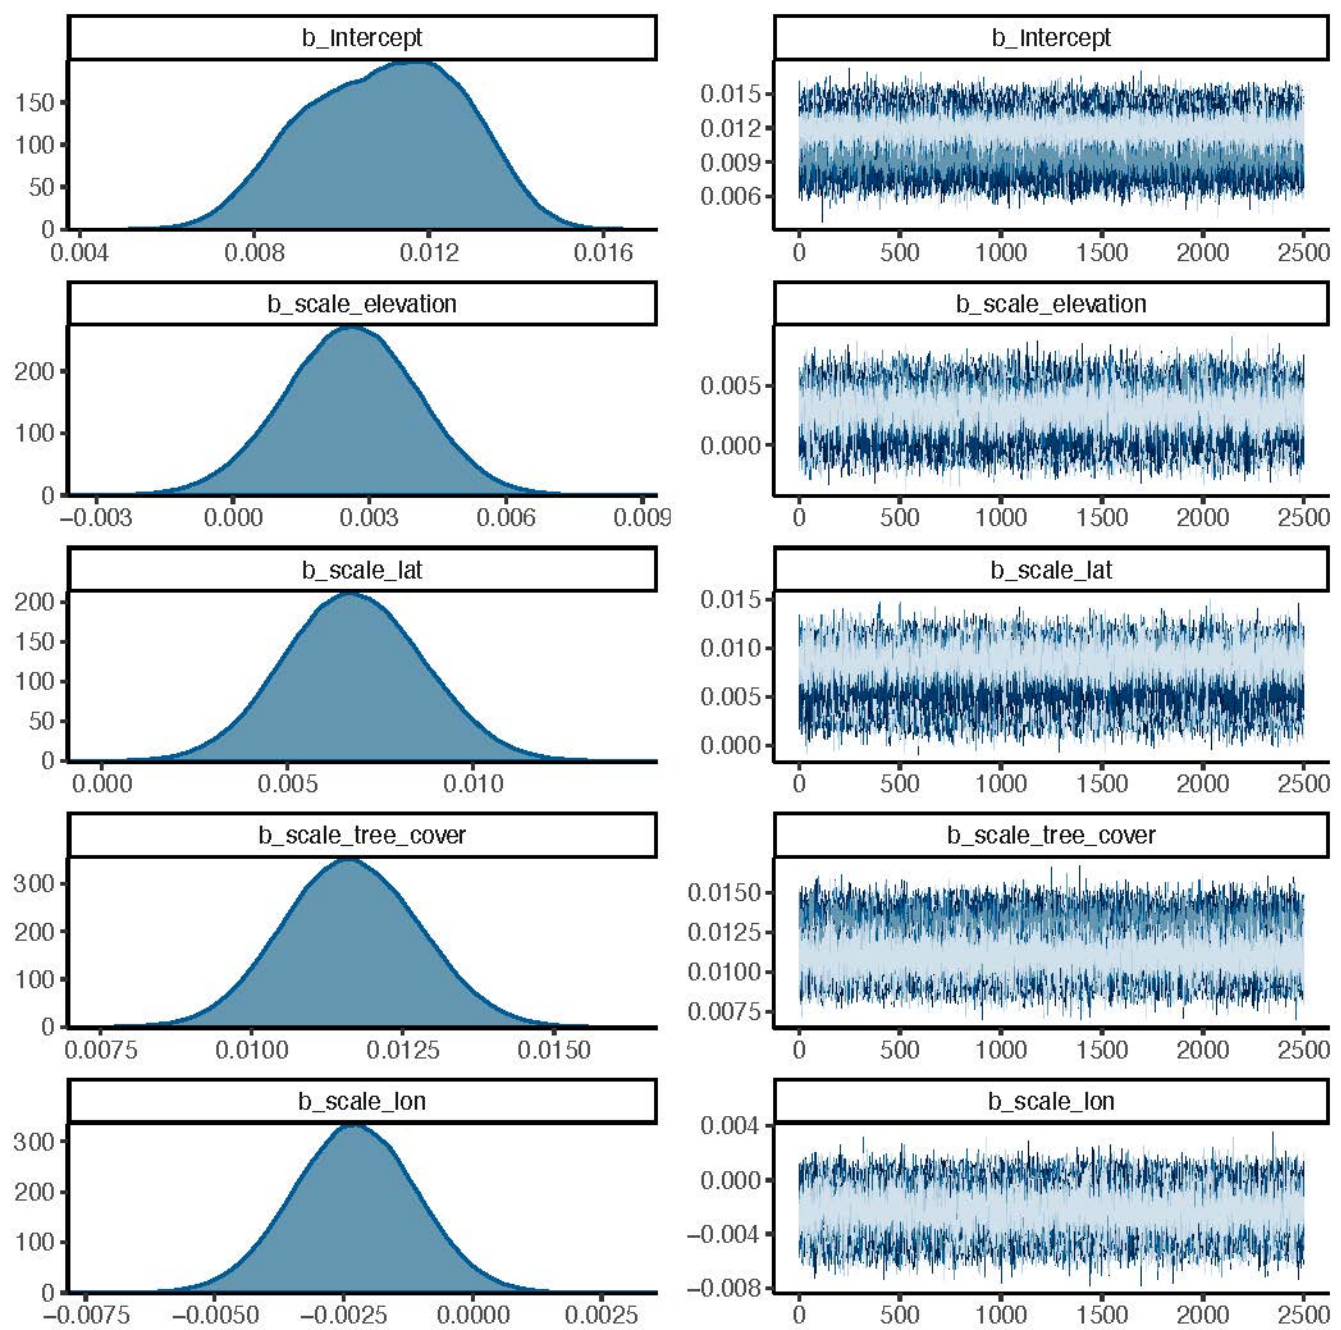

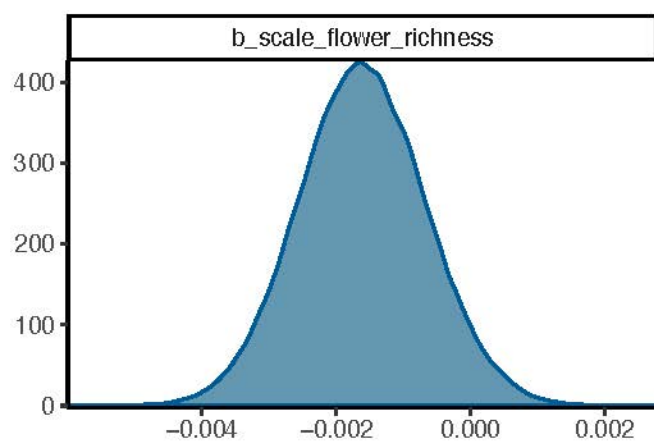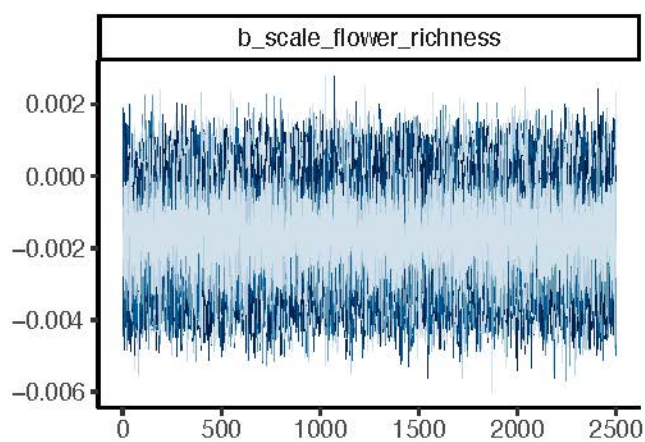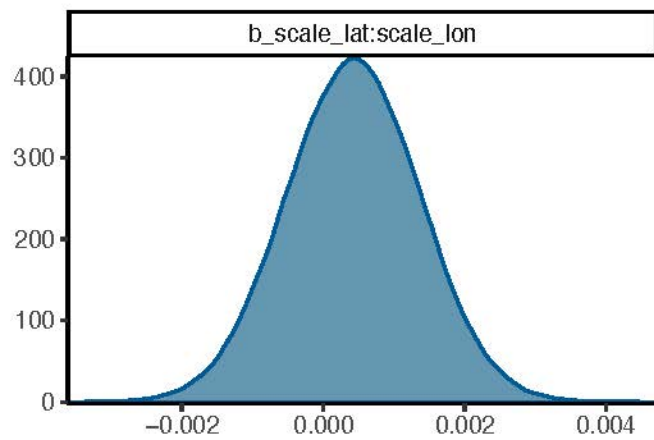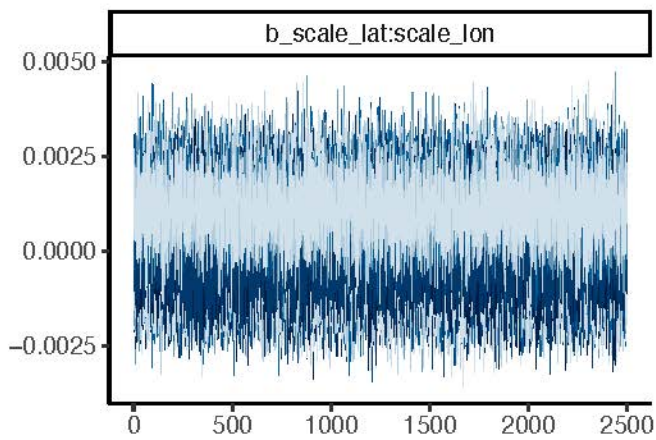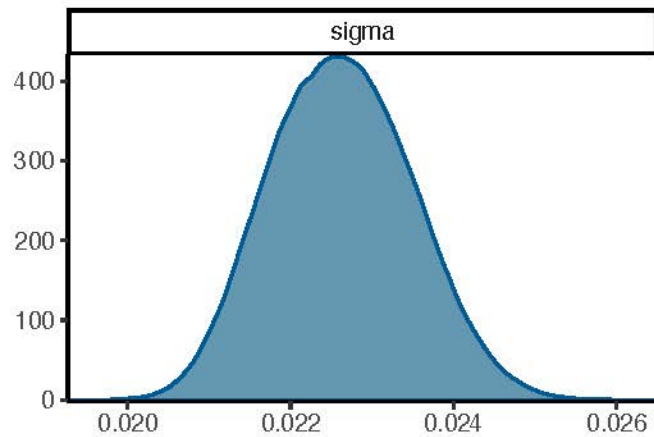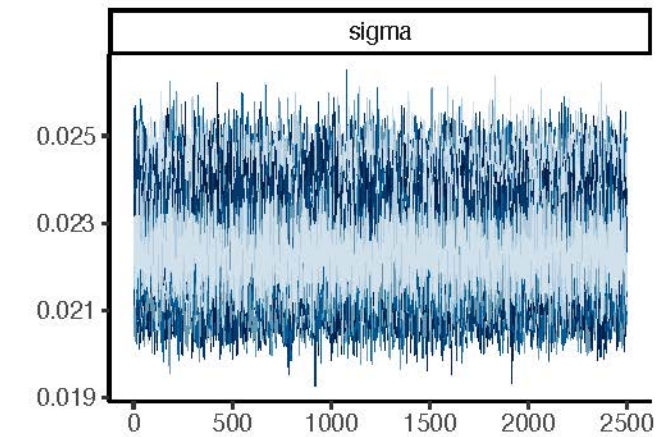

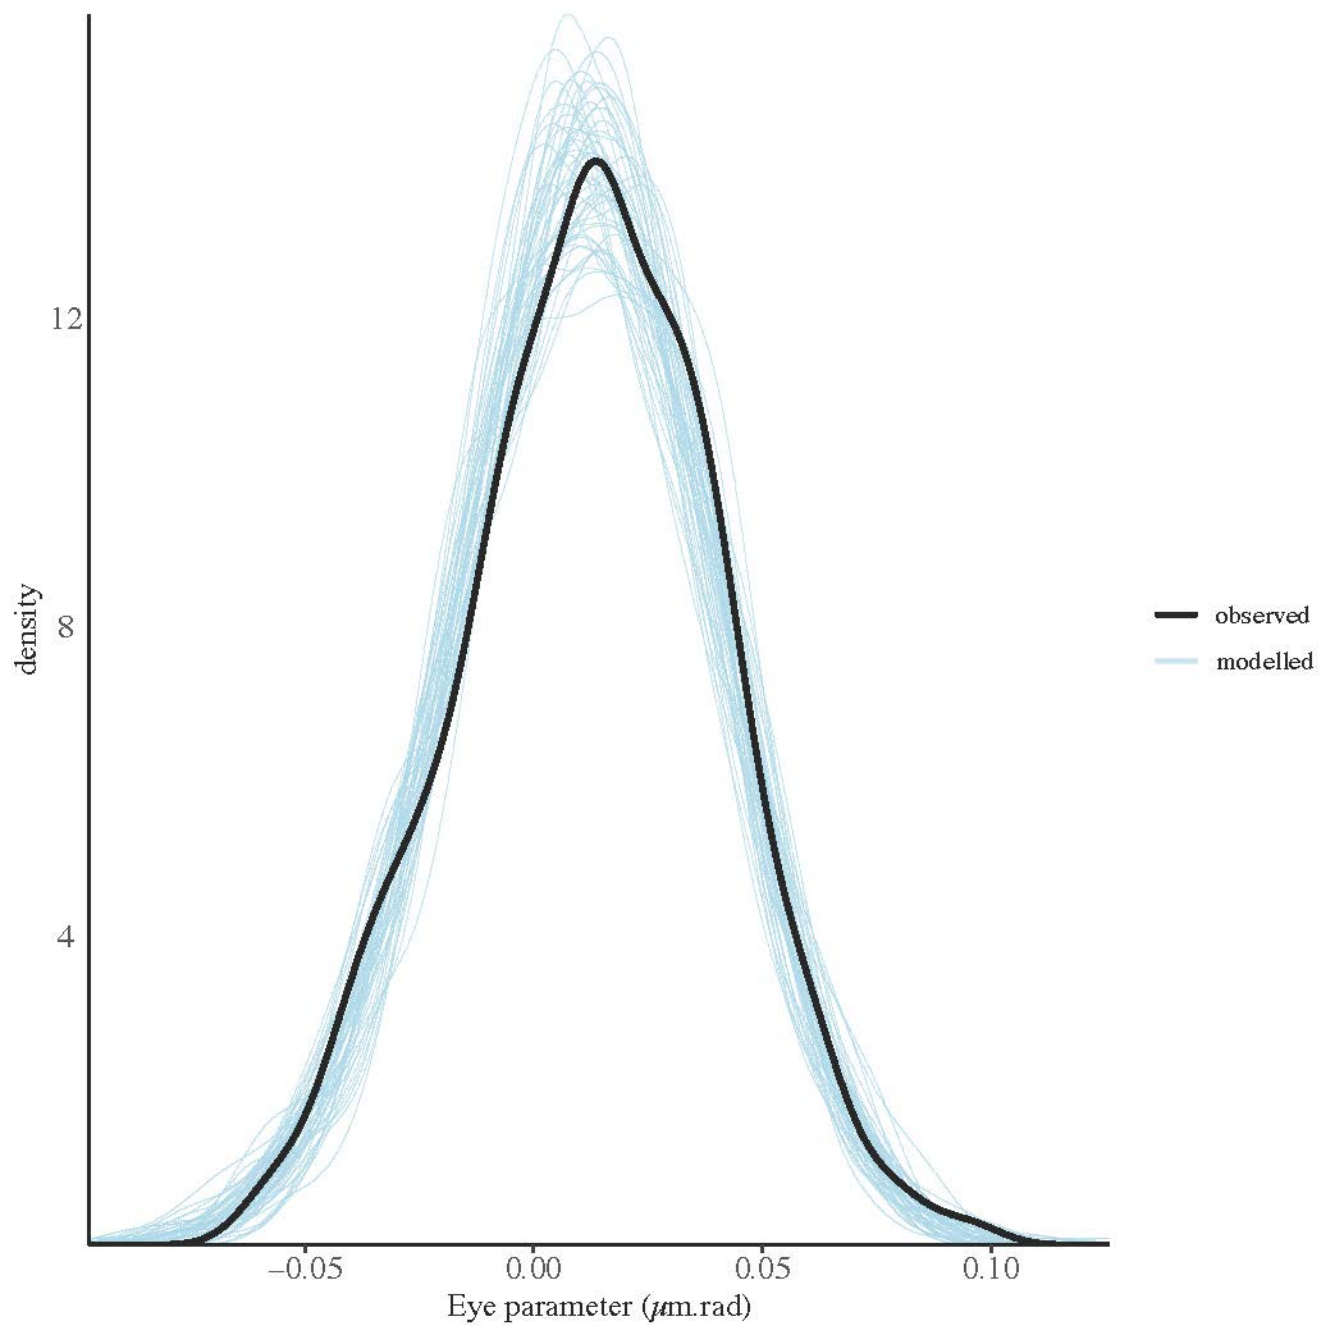

Curvature ( $\mu\text{m}$ )



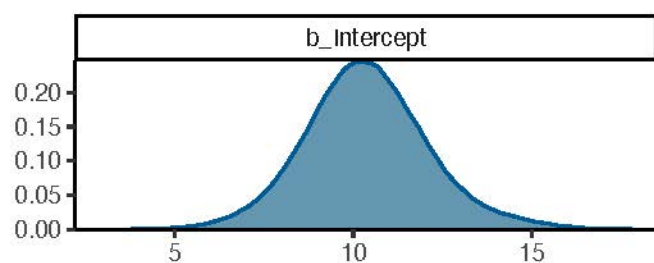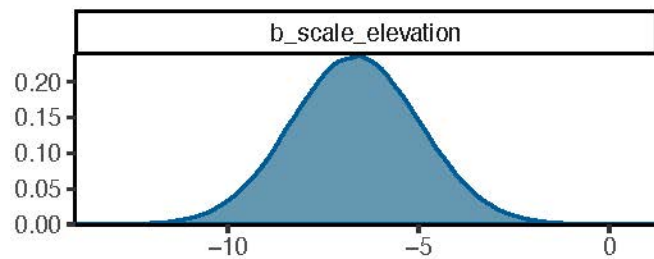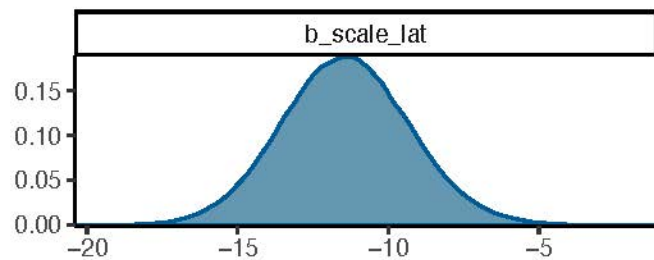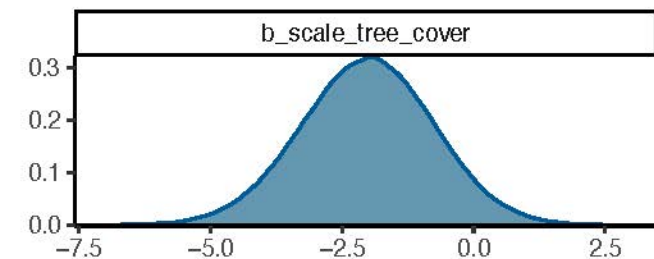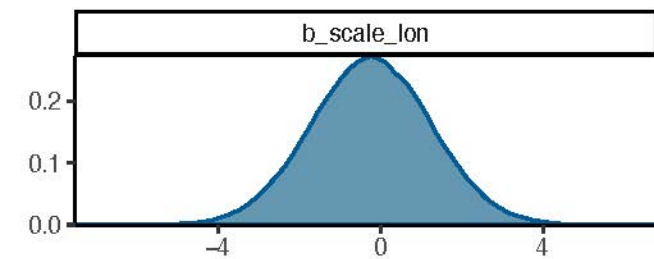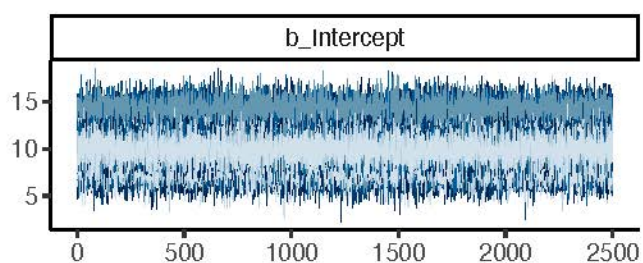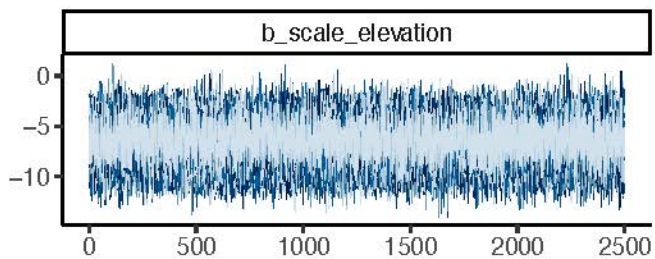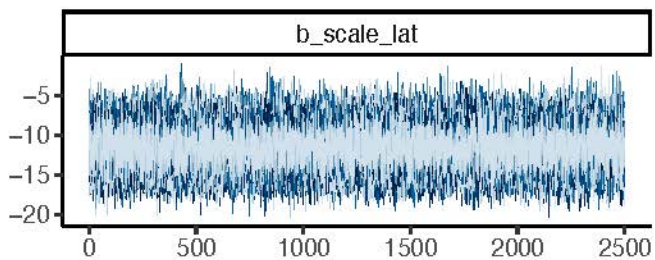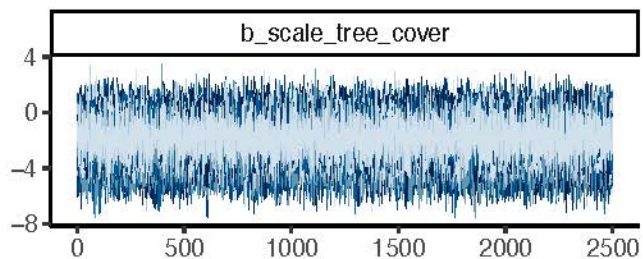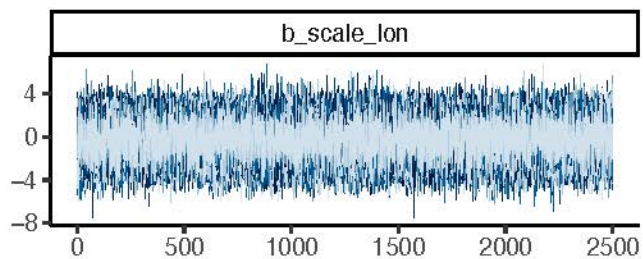



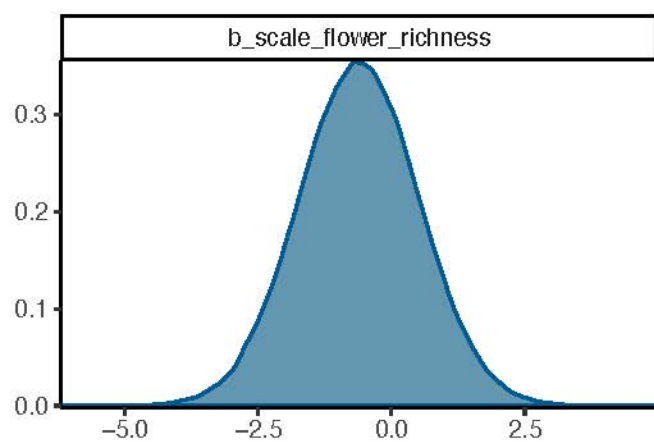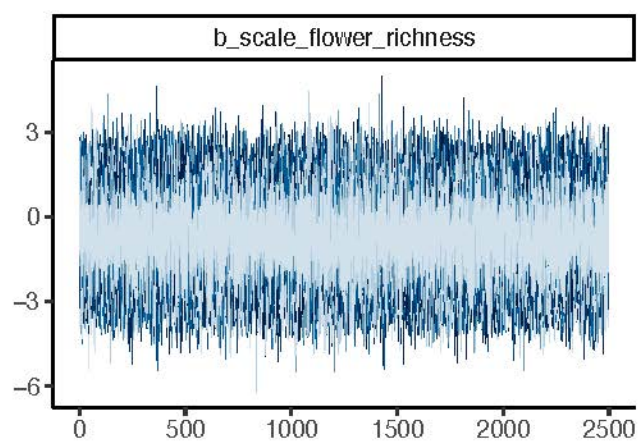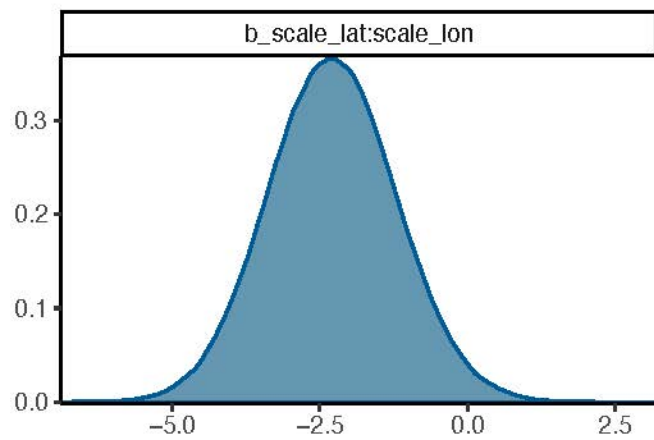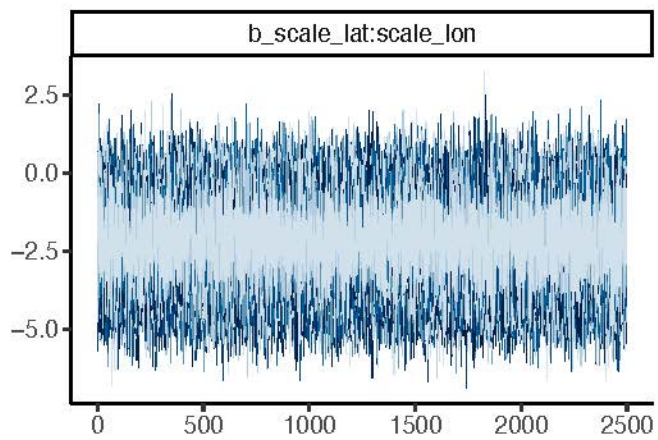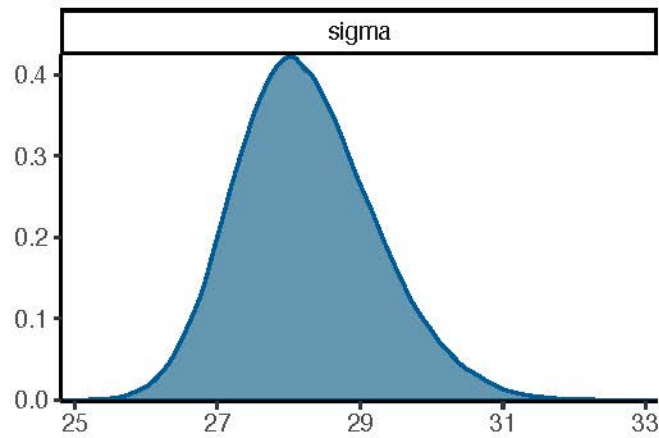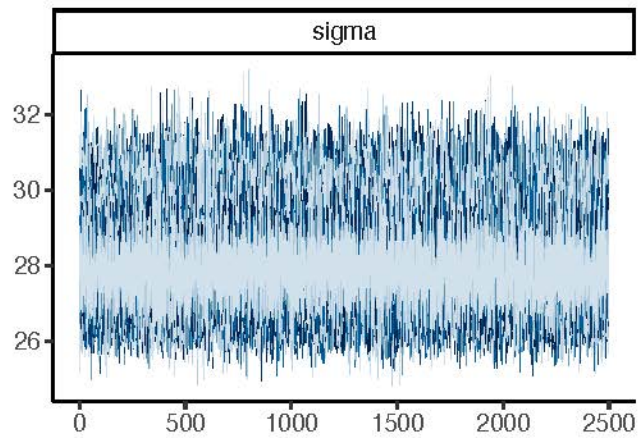

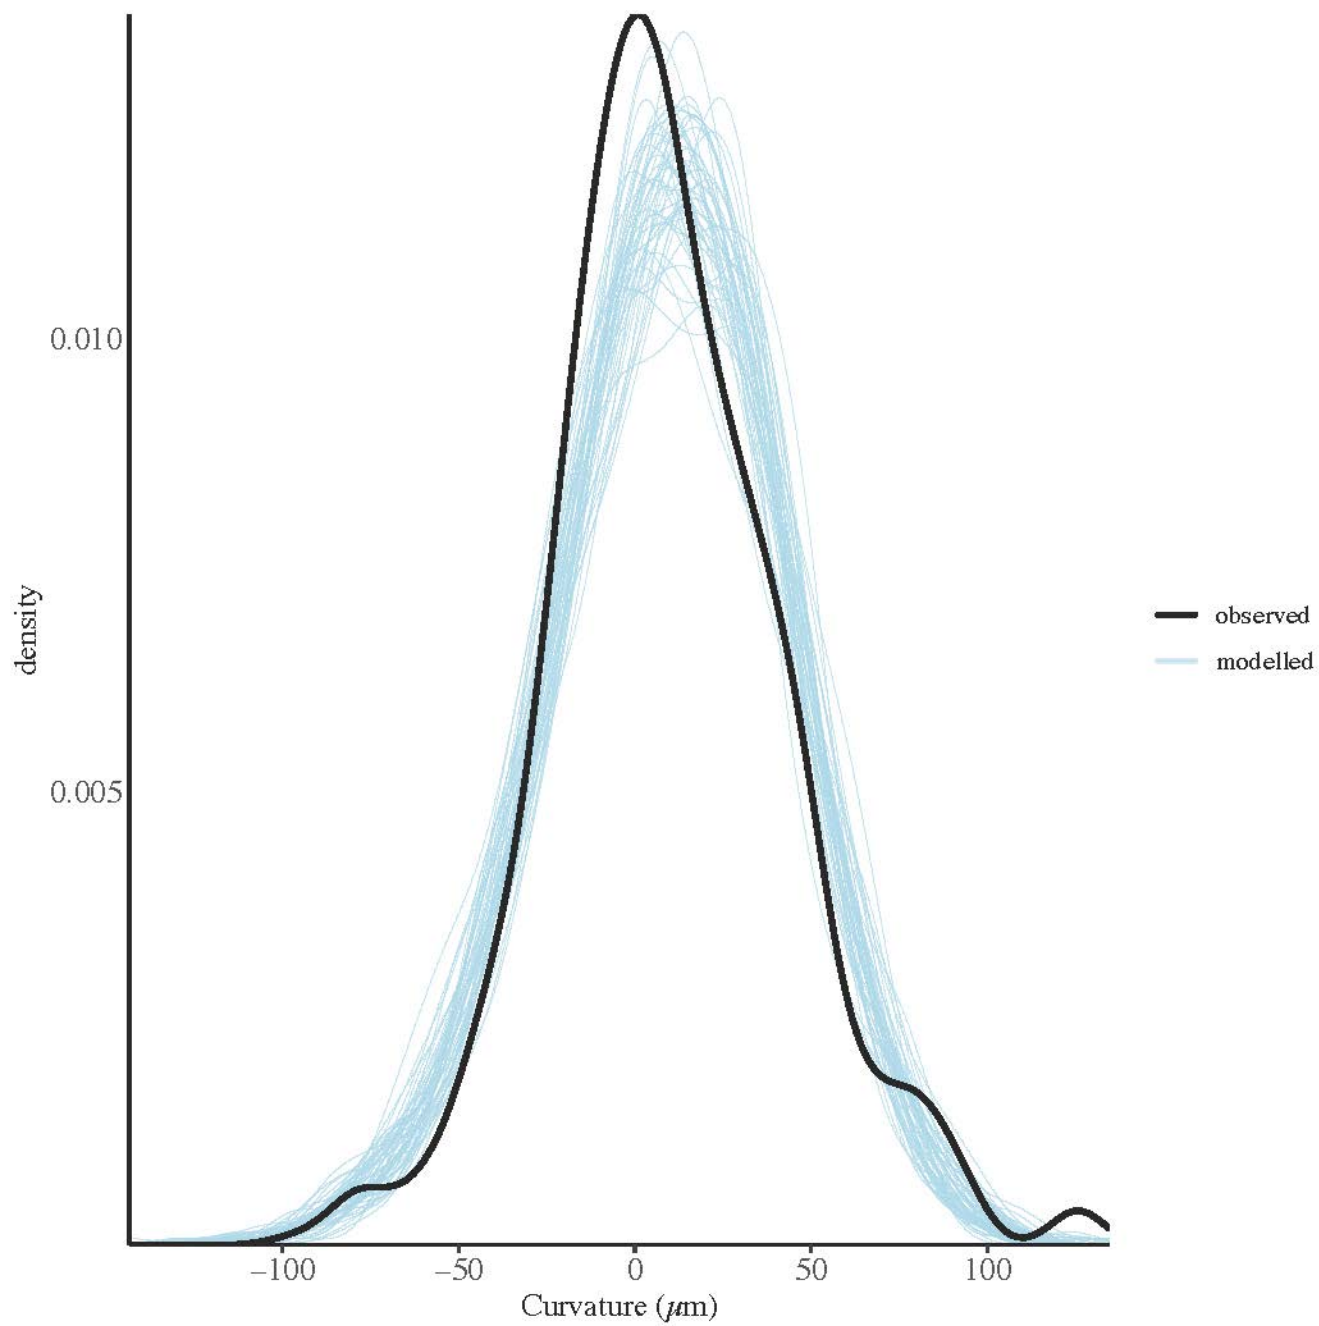

Central ocellus diameter ( $\mu\text{m}$ )

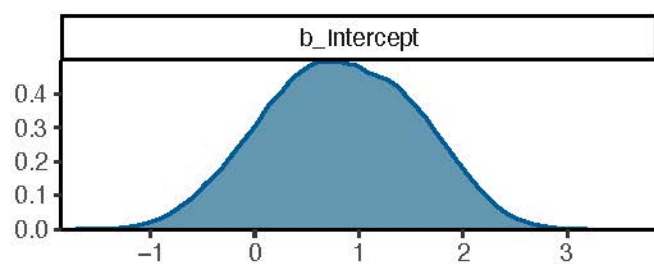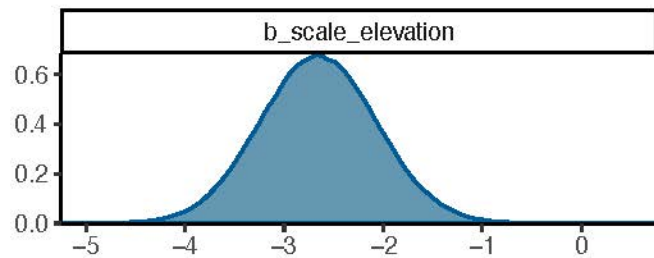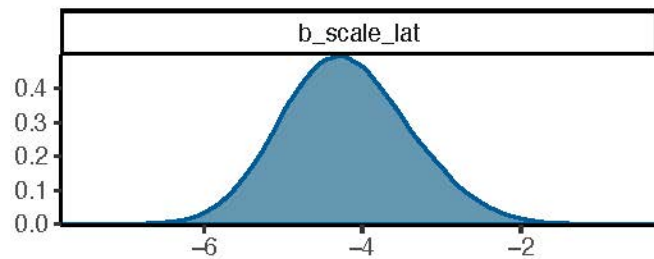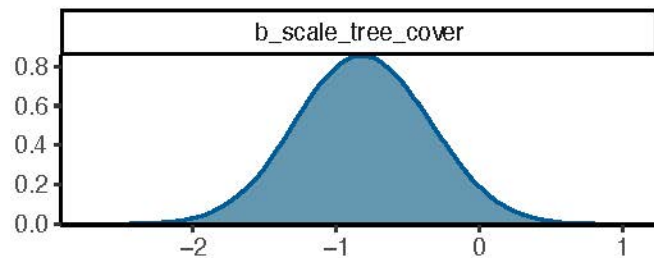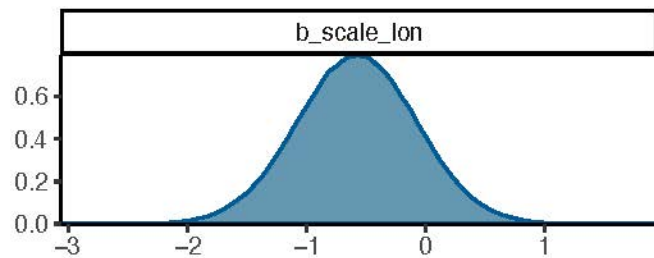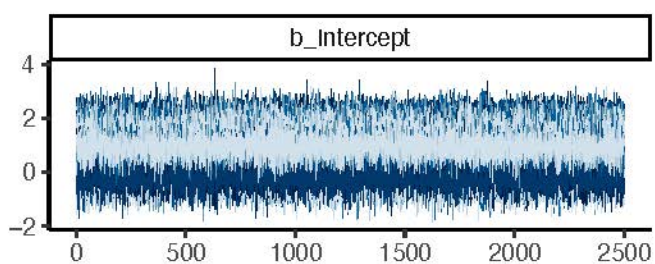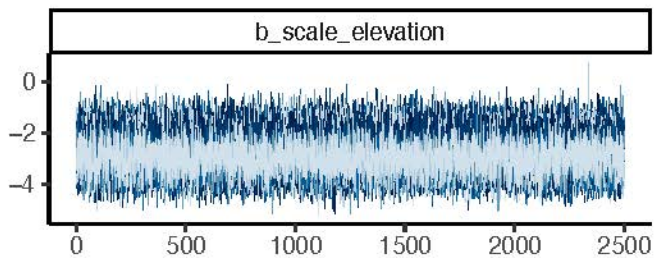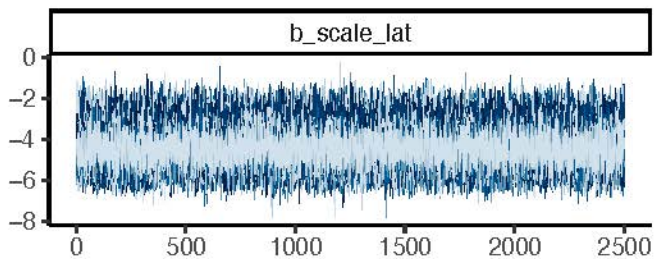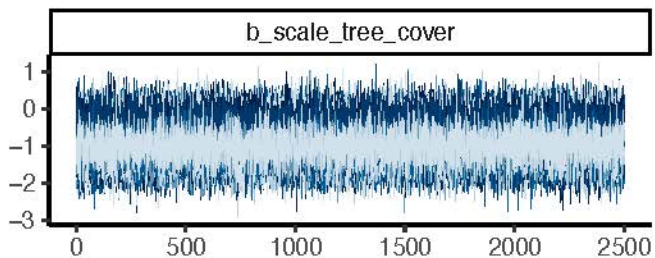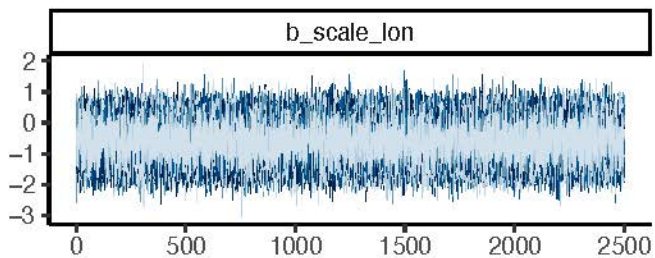

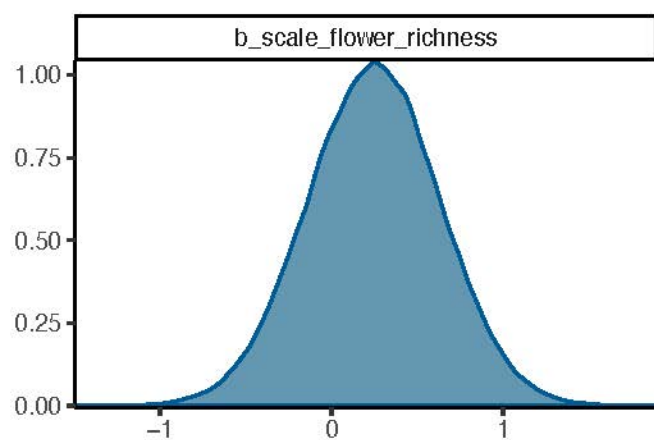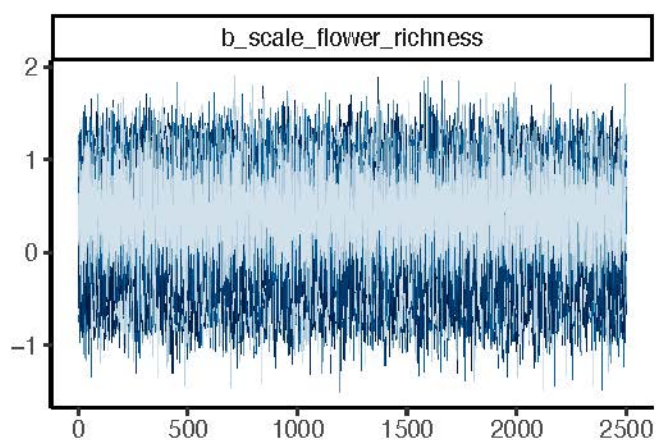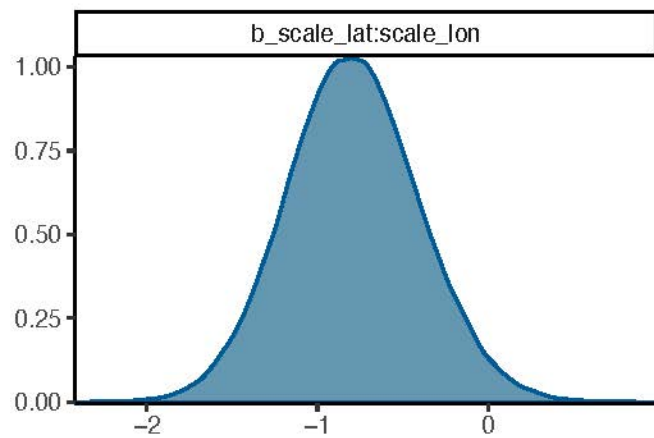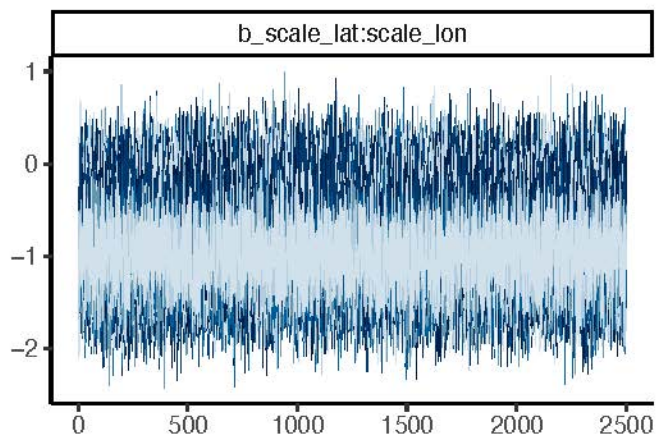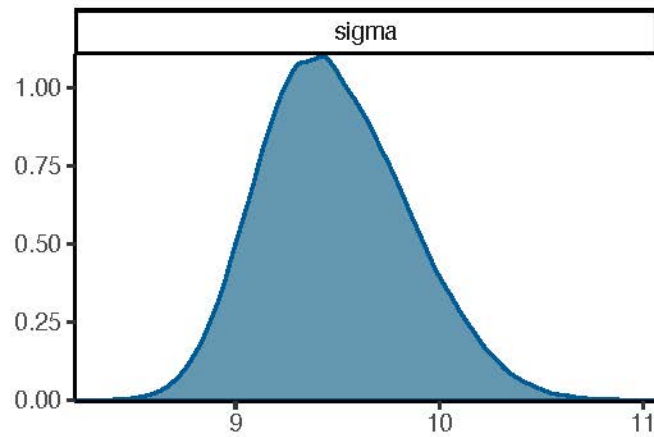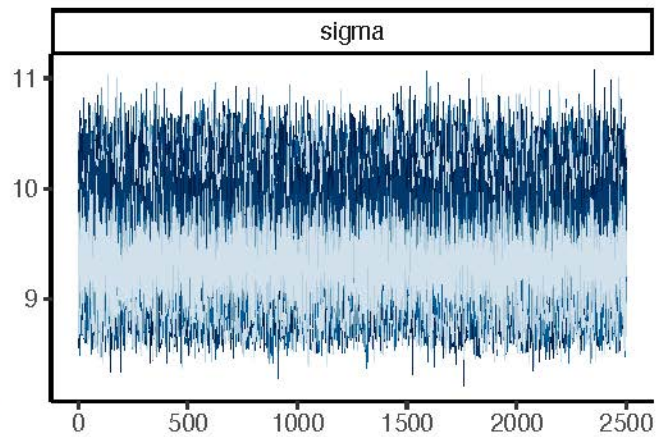



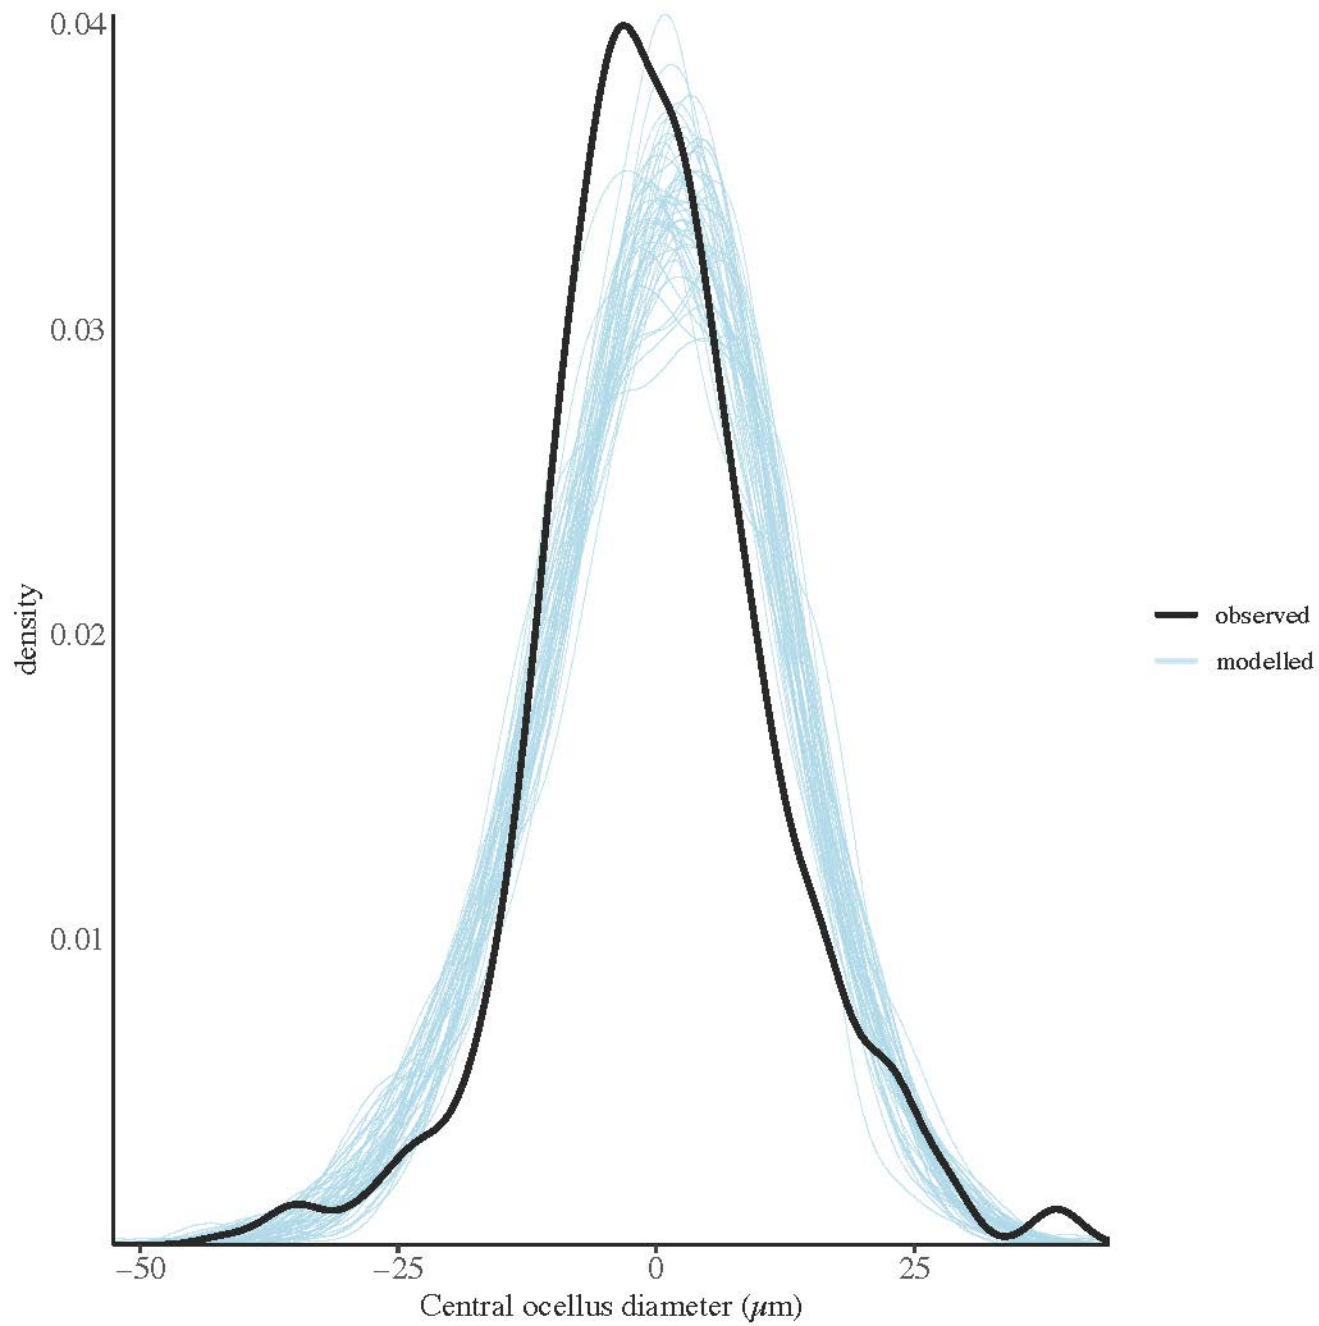

Lateral ocelli diameter ( $\mu\text{m}$ )



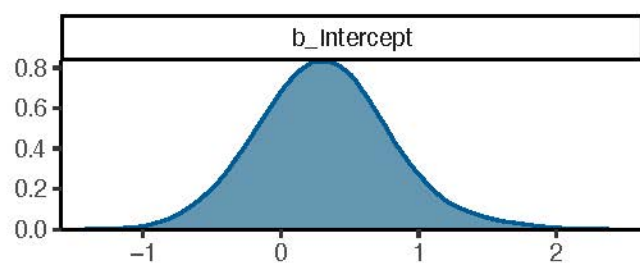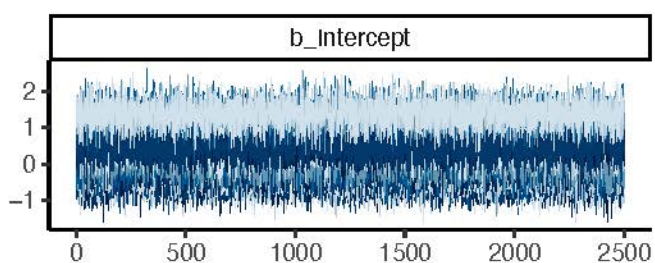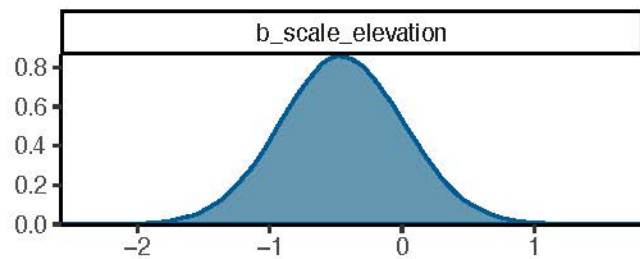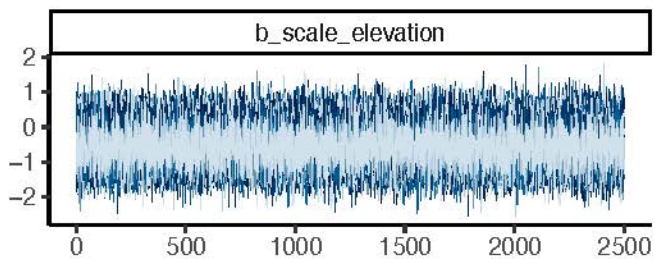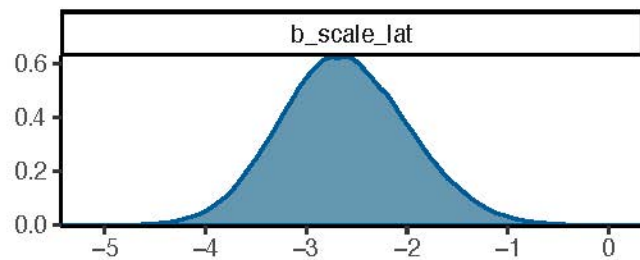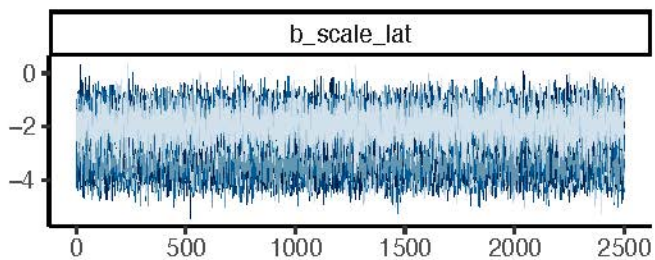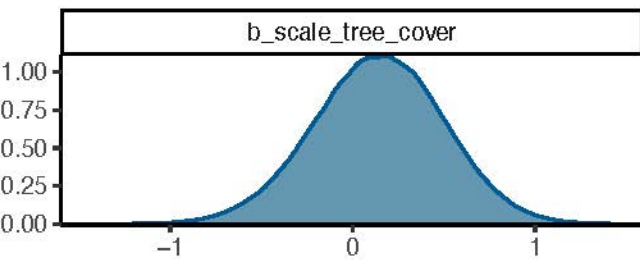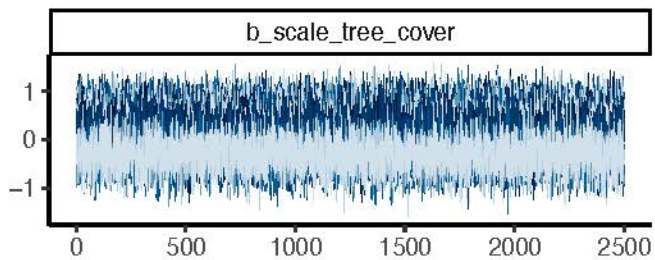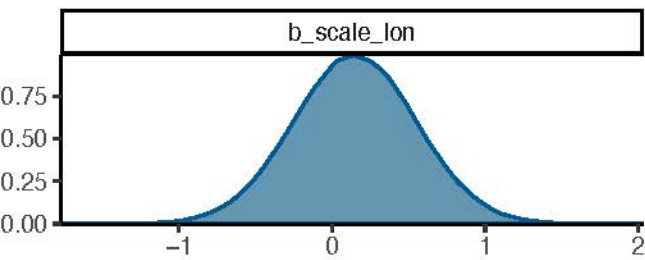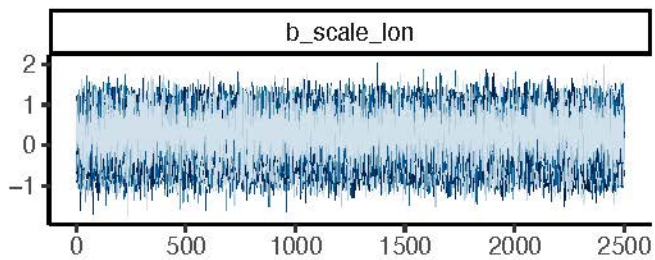

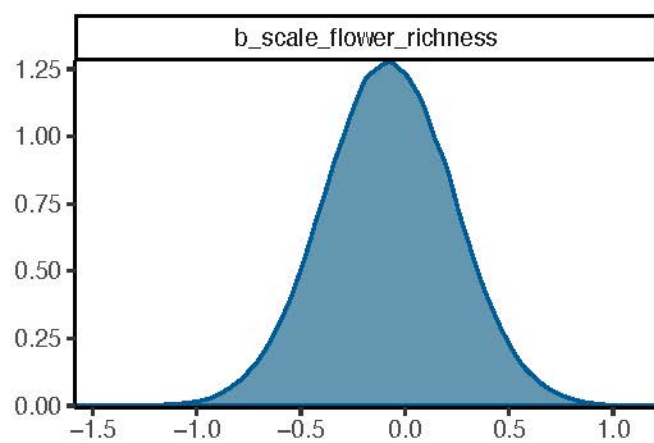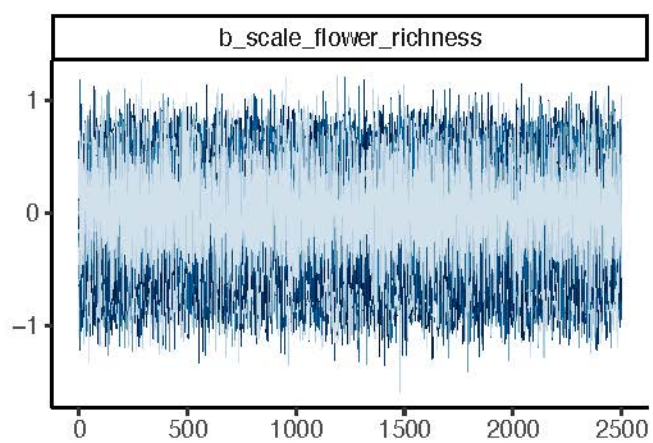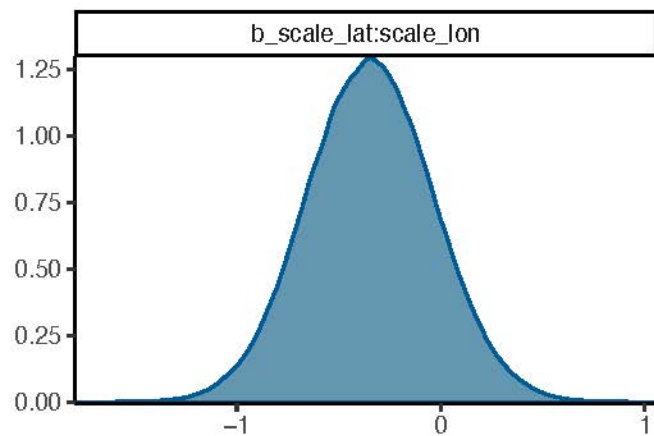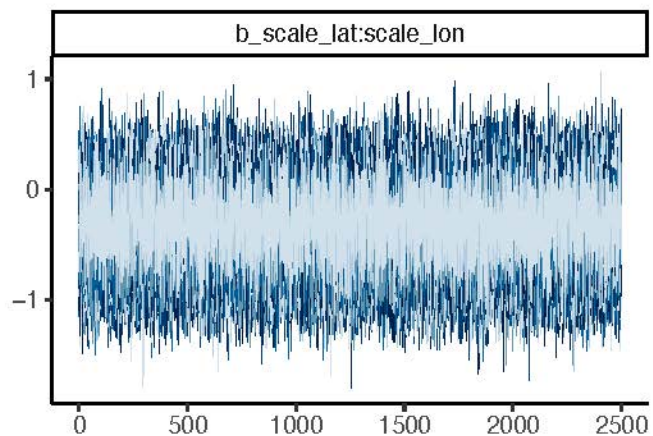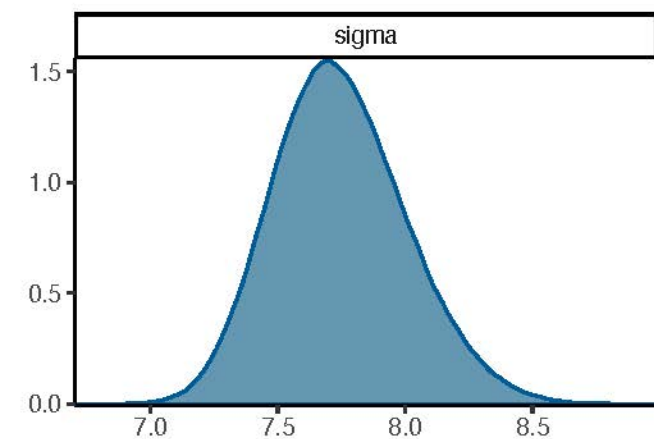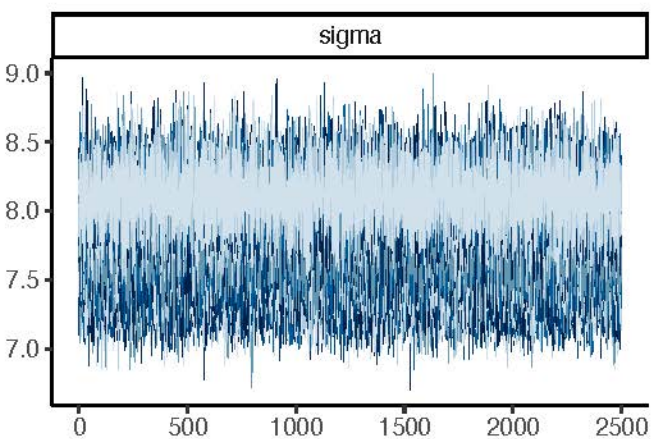

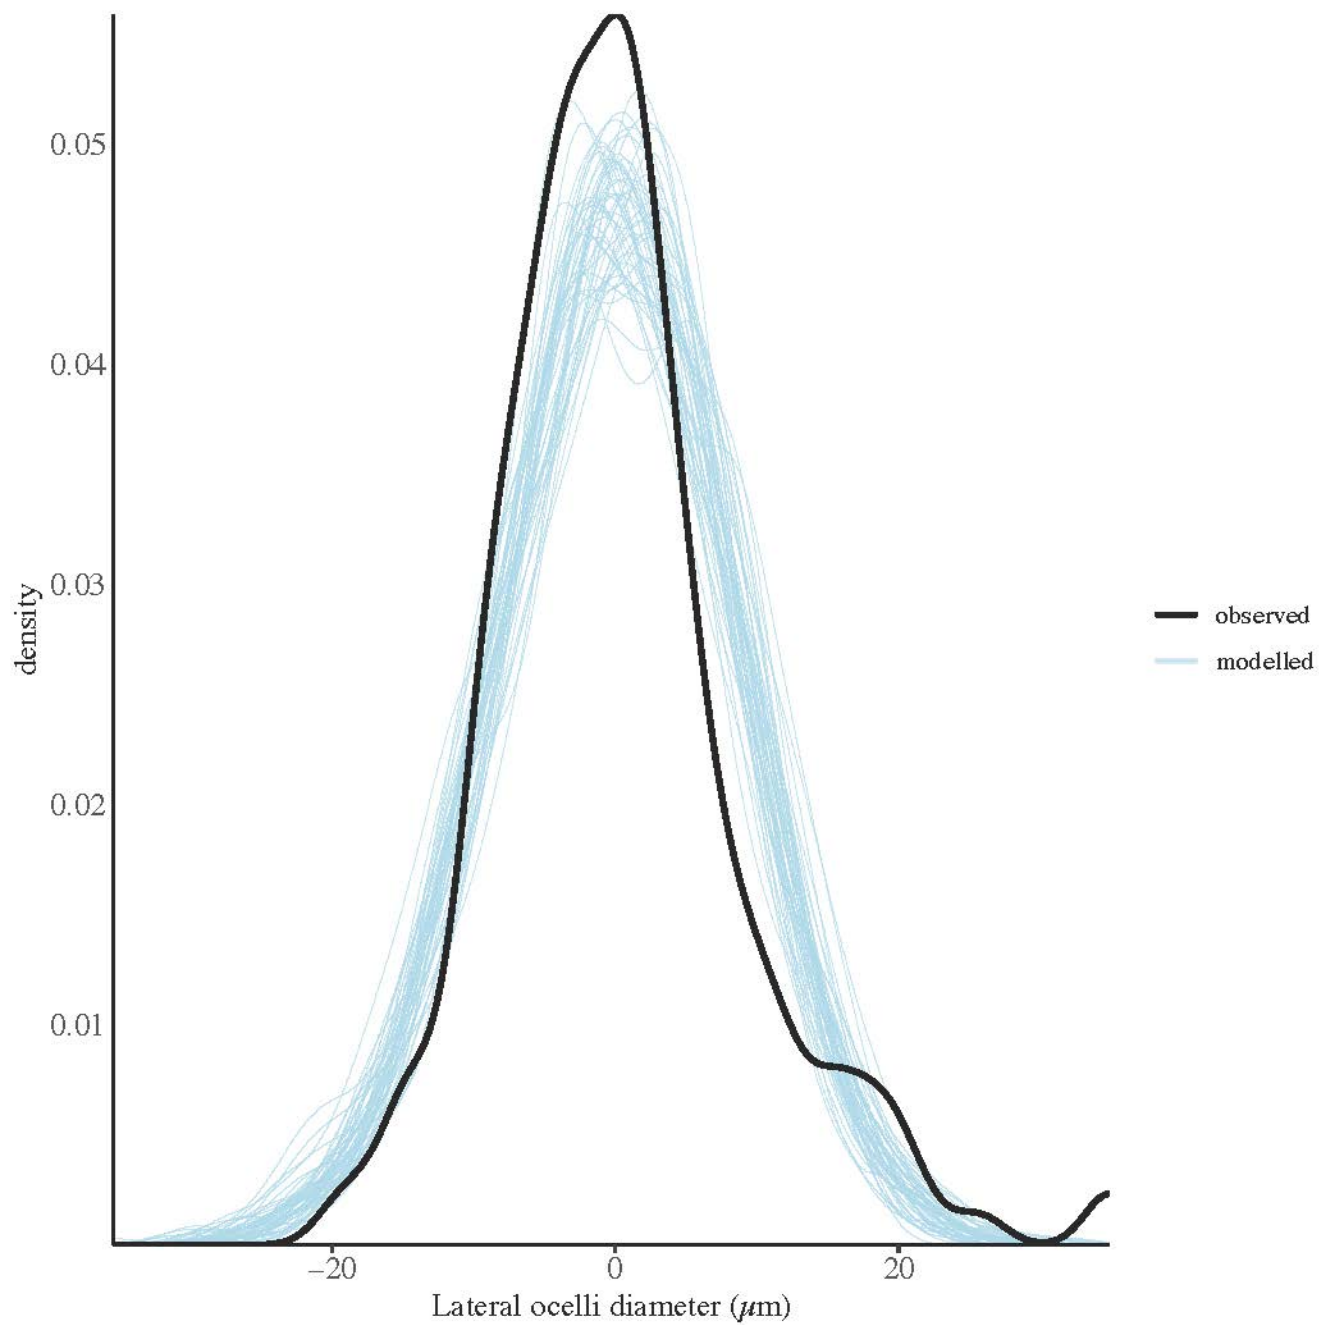

Ocellar alignment ( $^{\circ}$ )

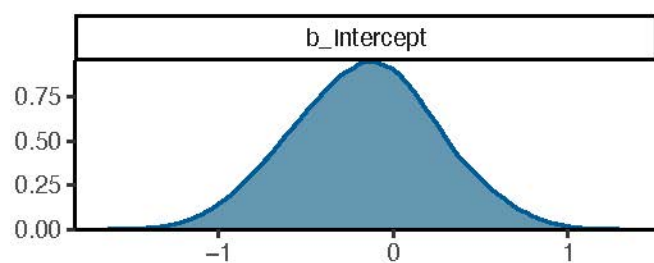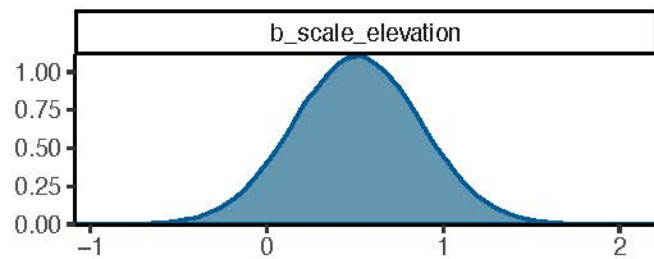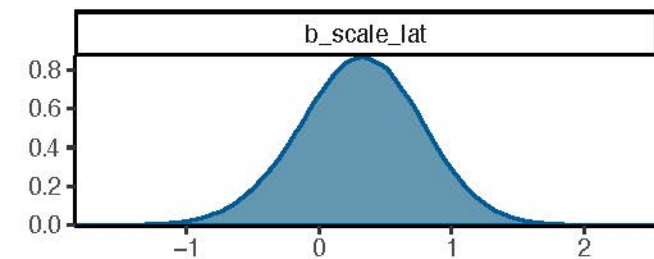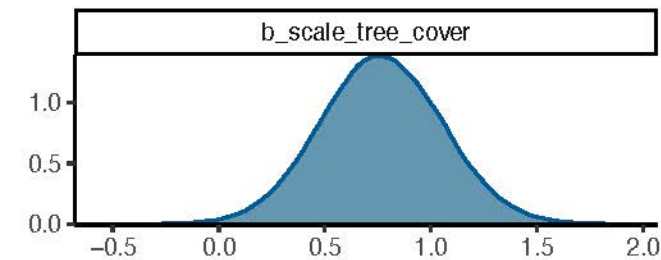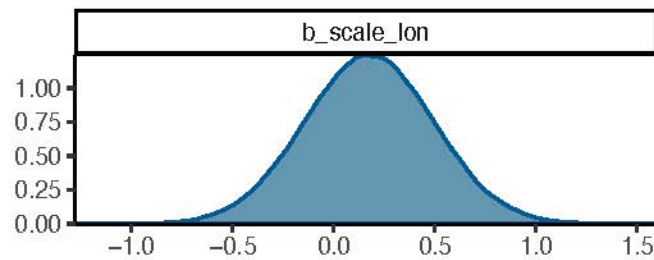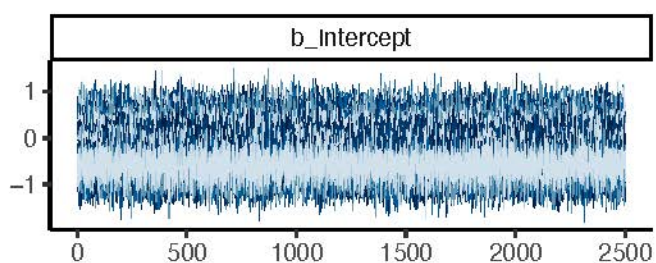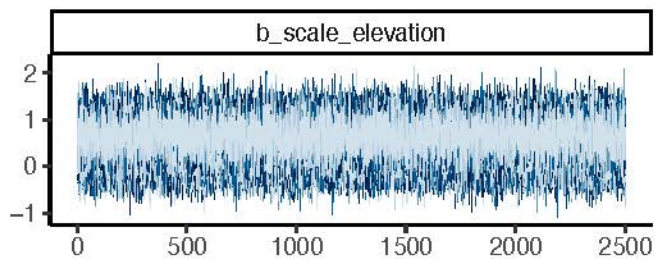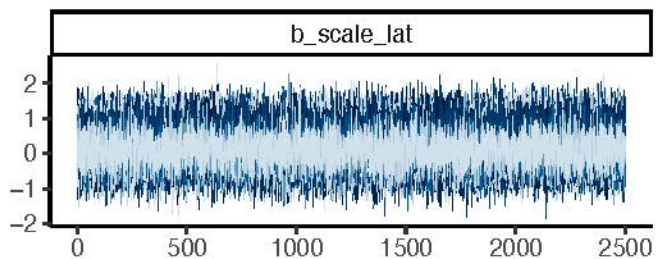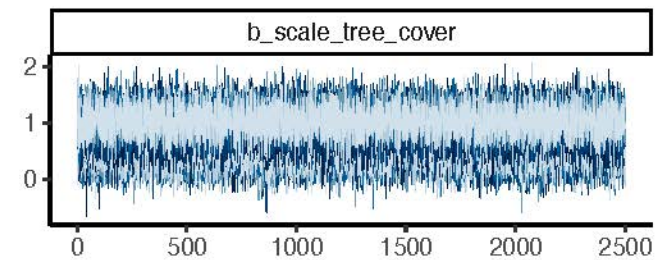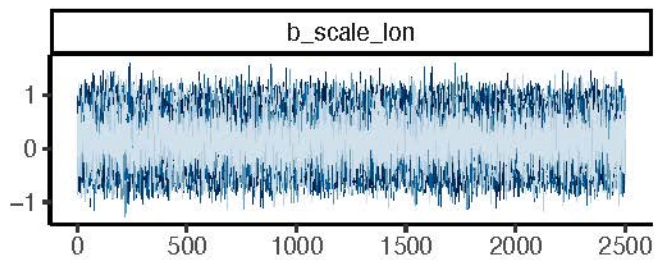



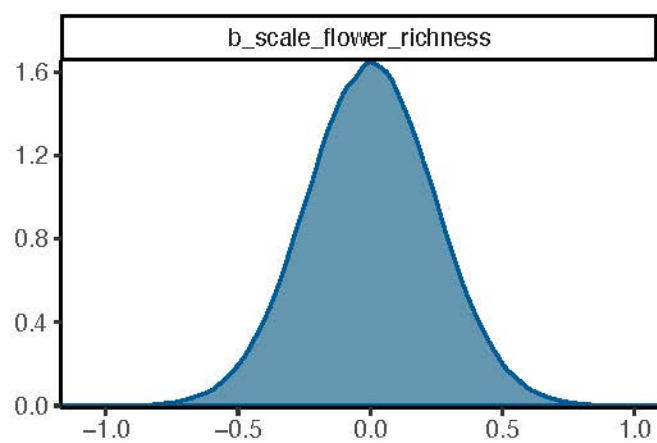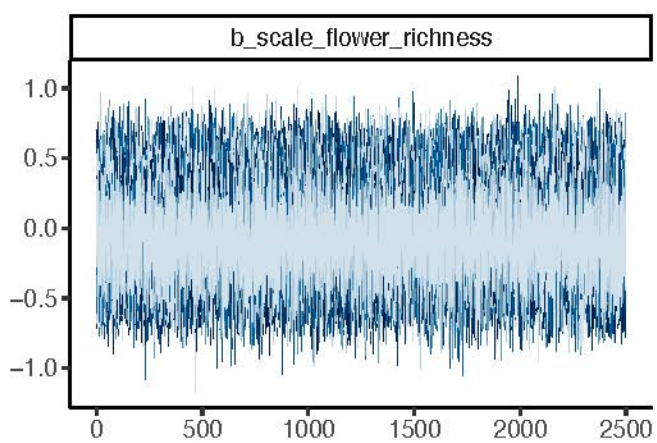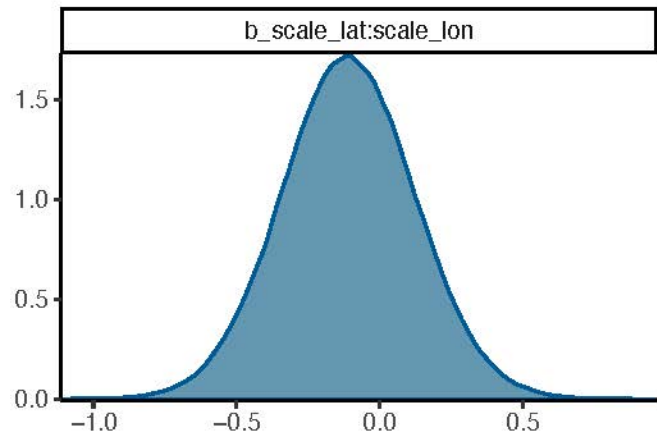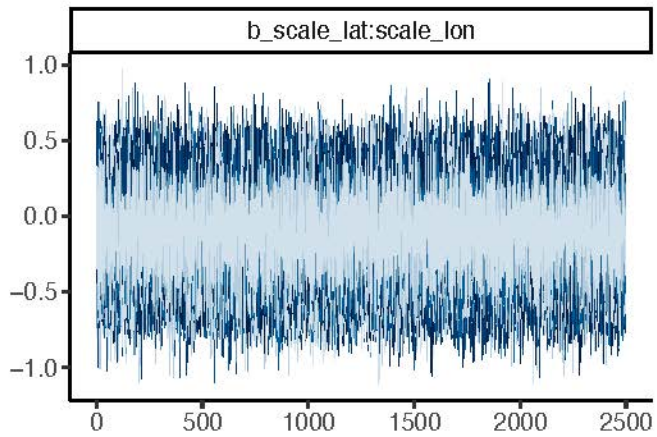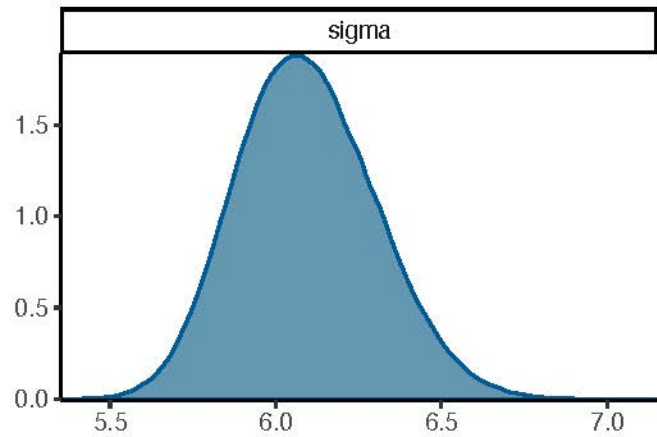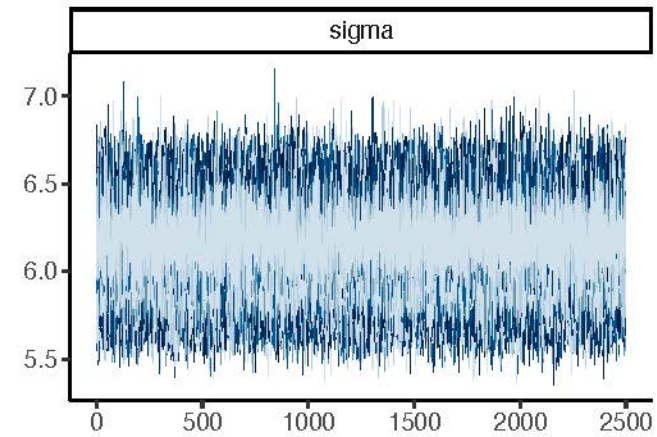

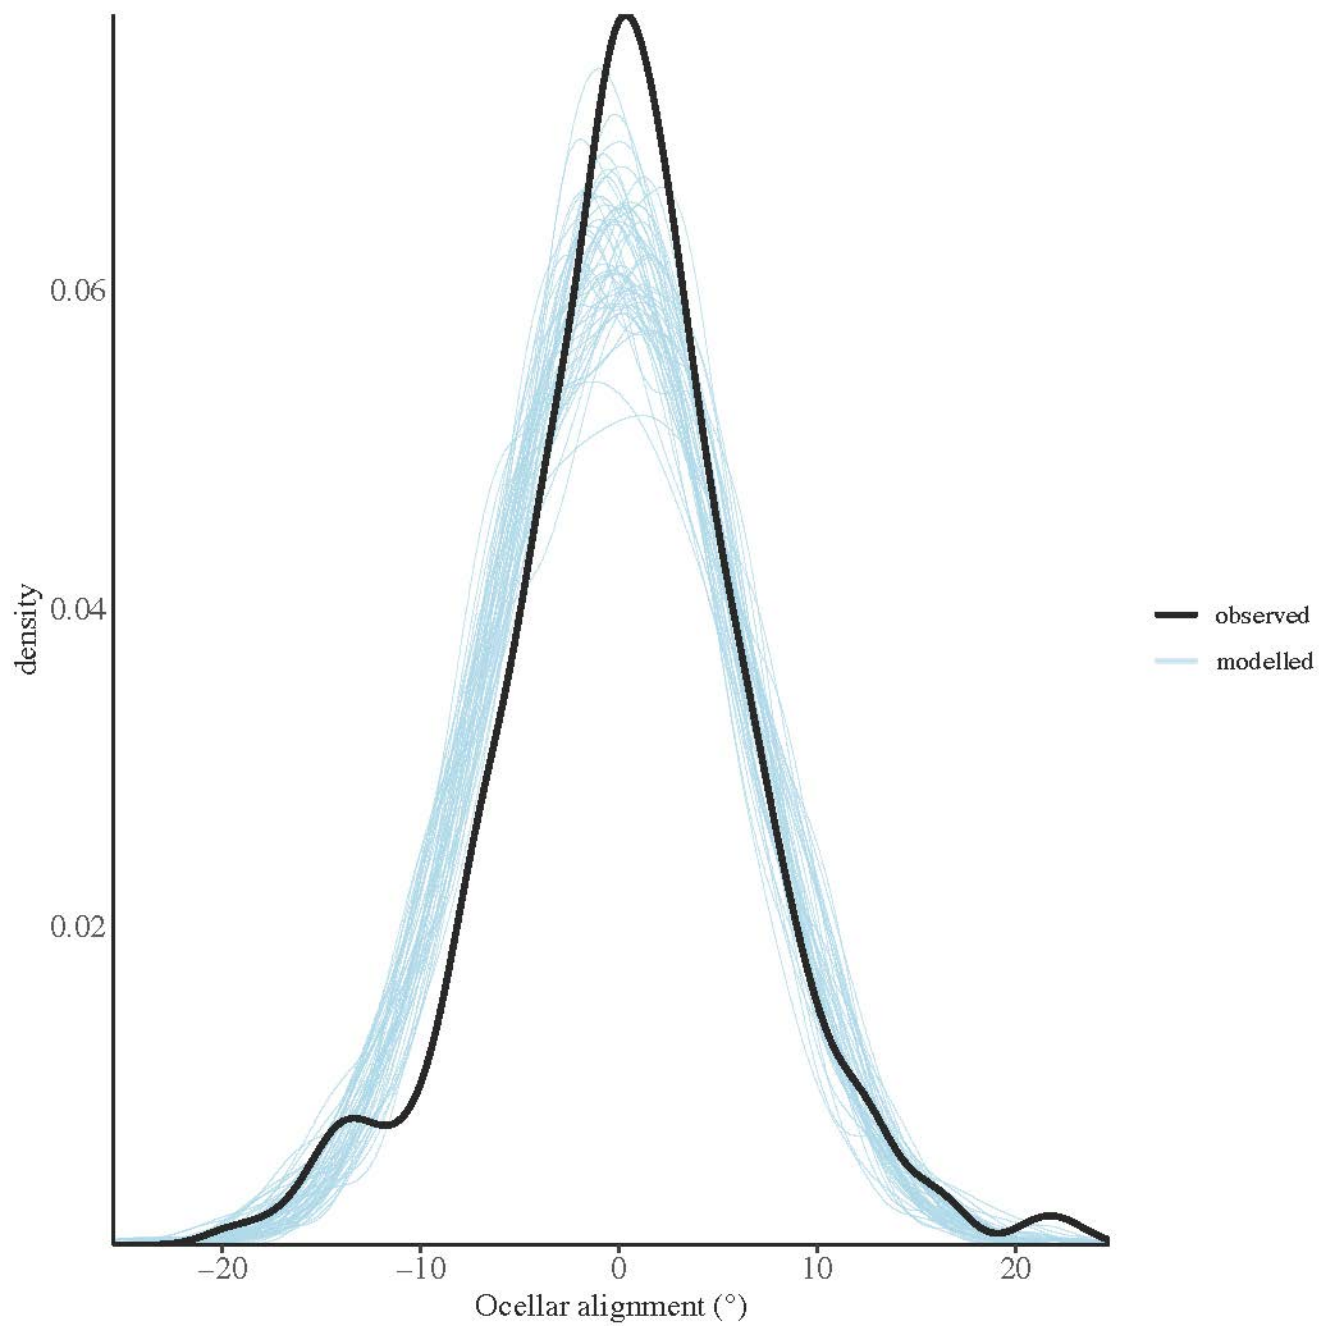



Monocular FOV (%)

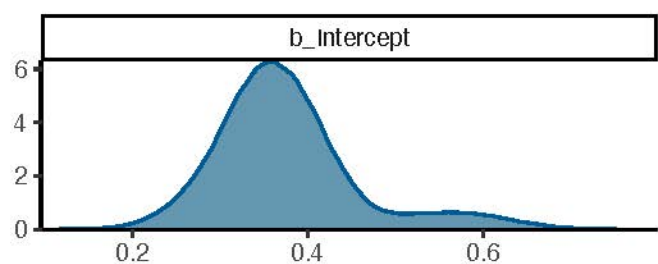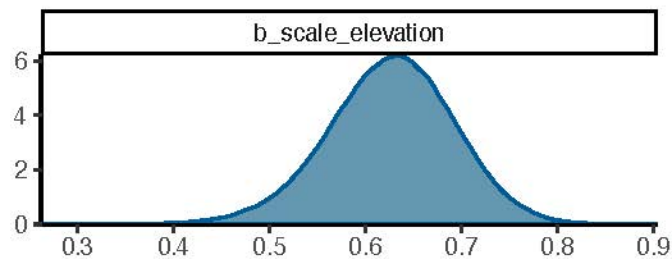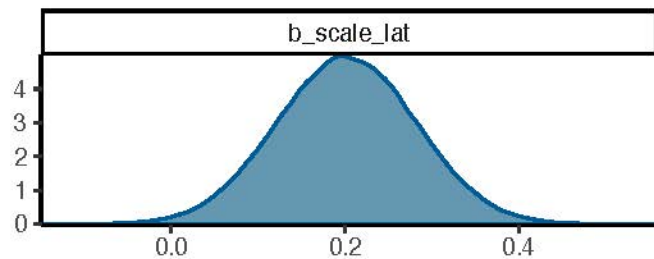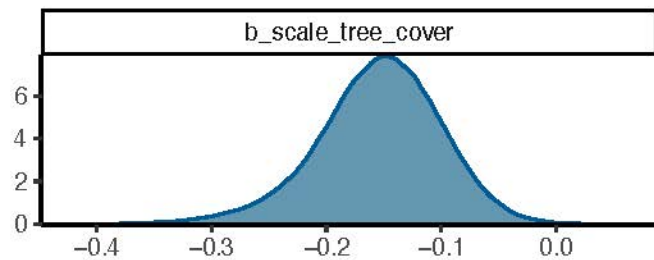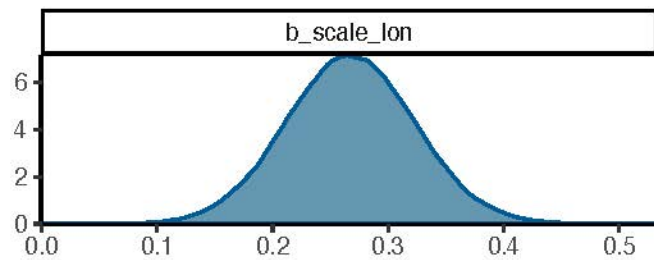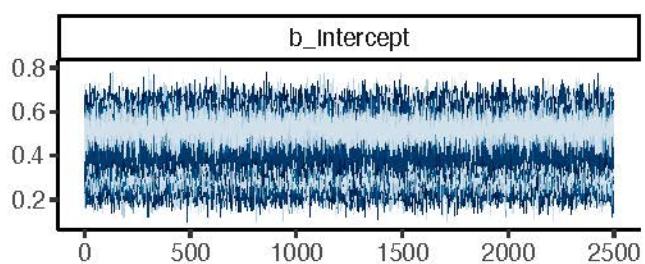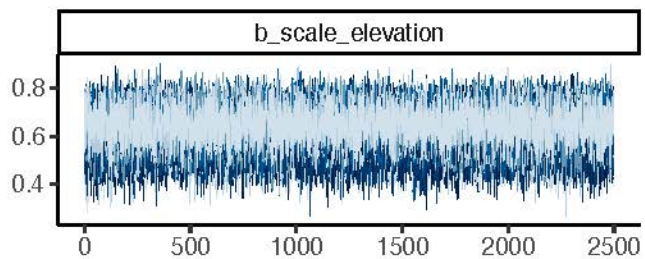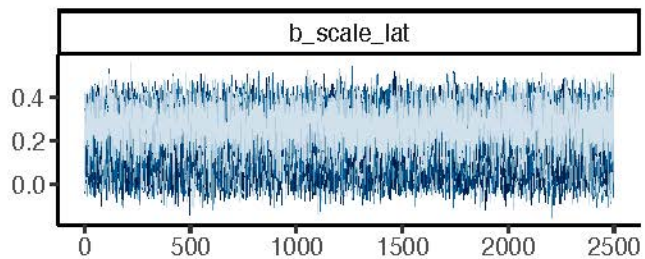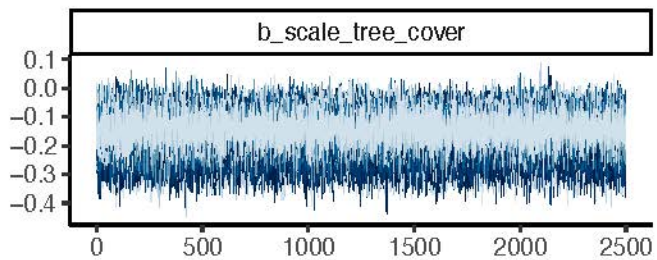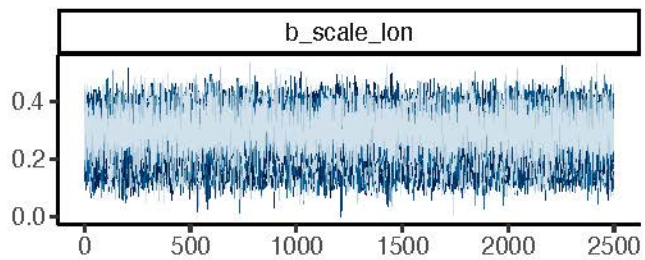

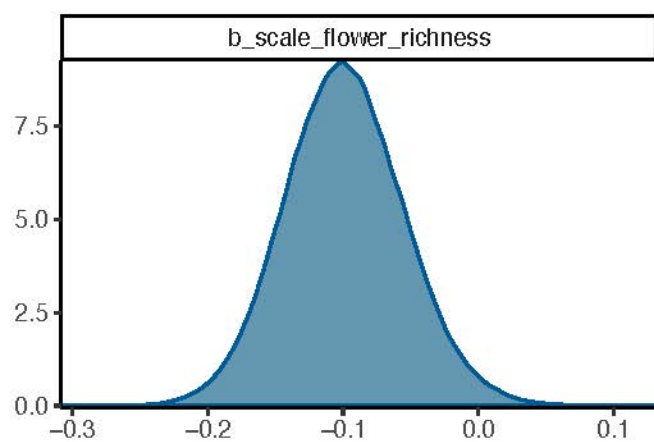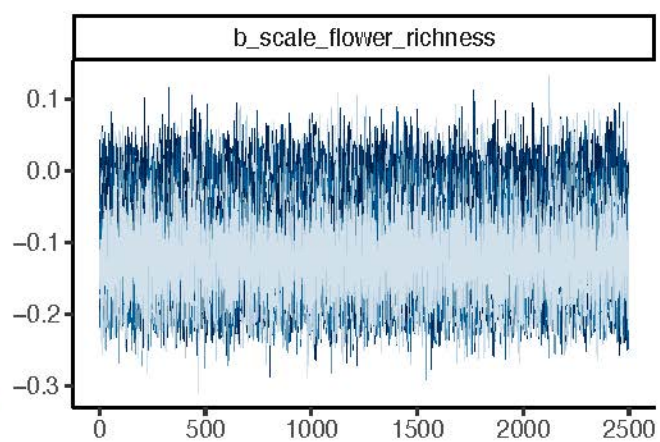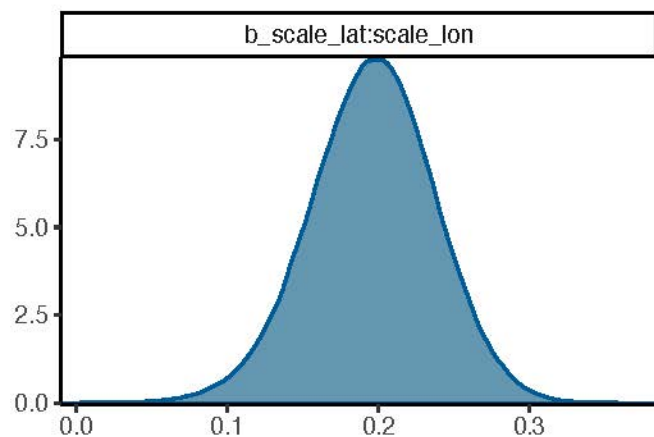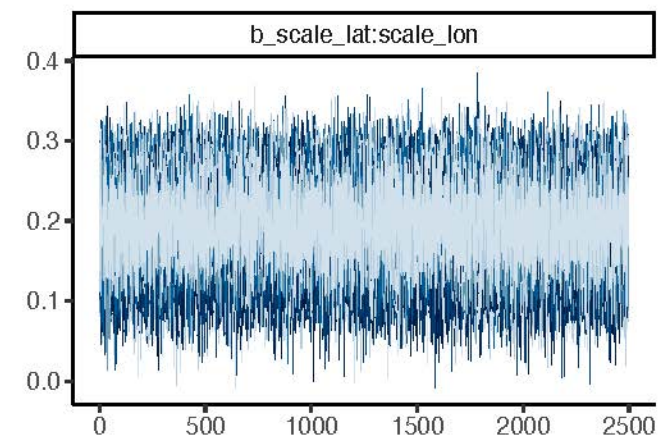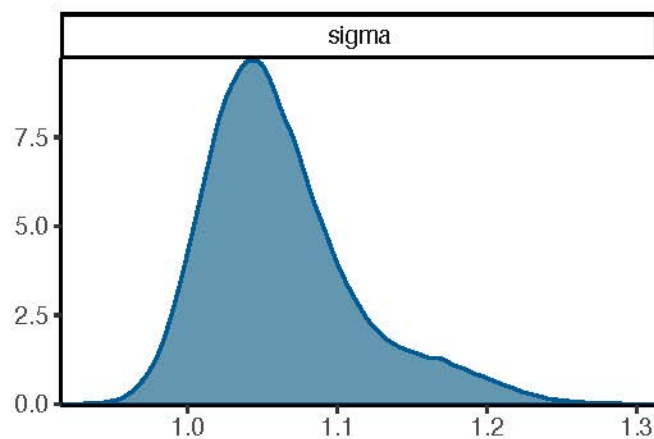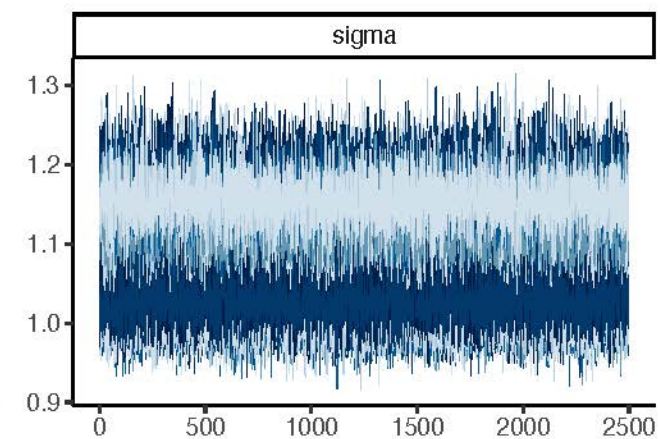

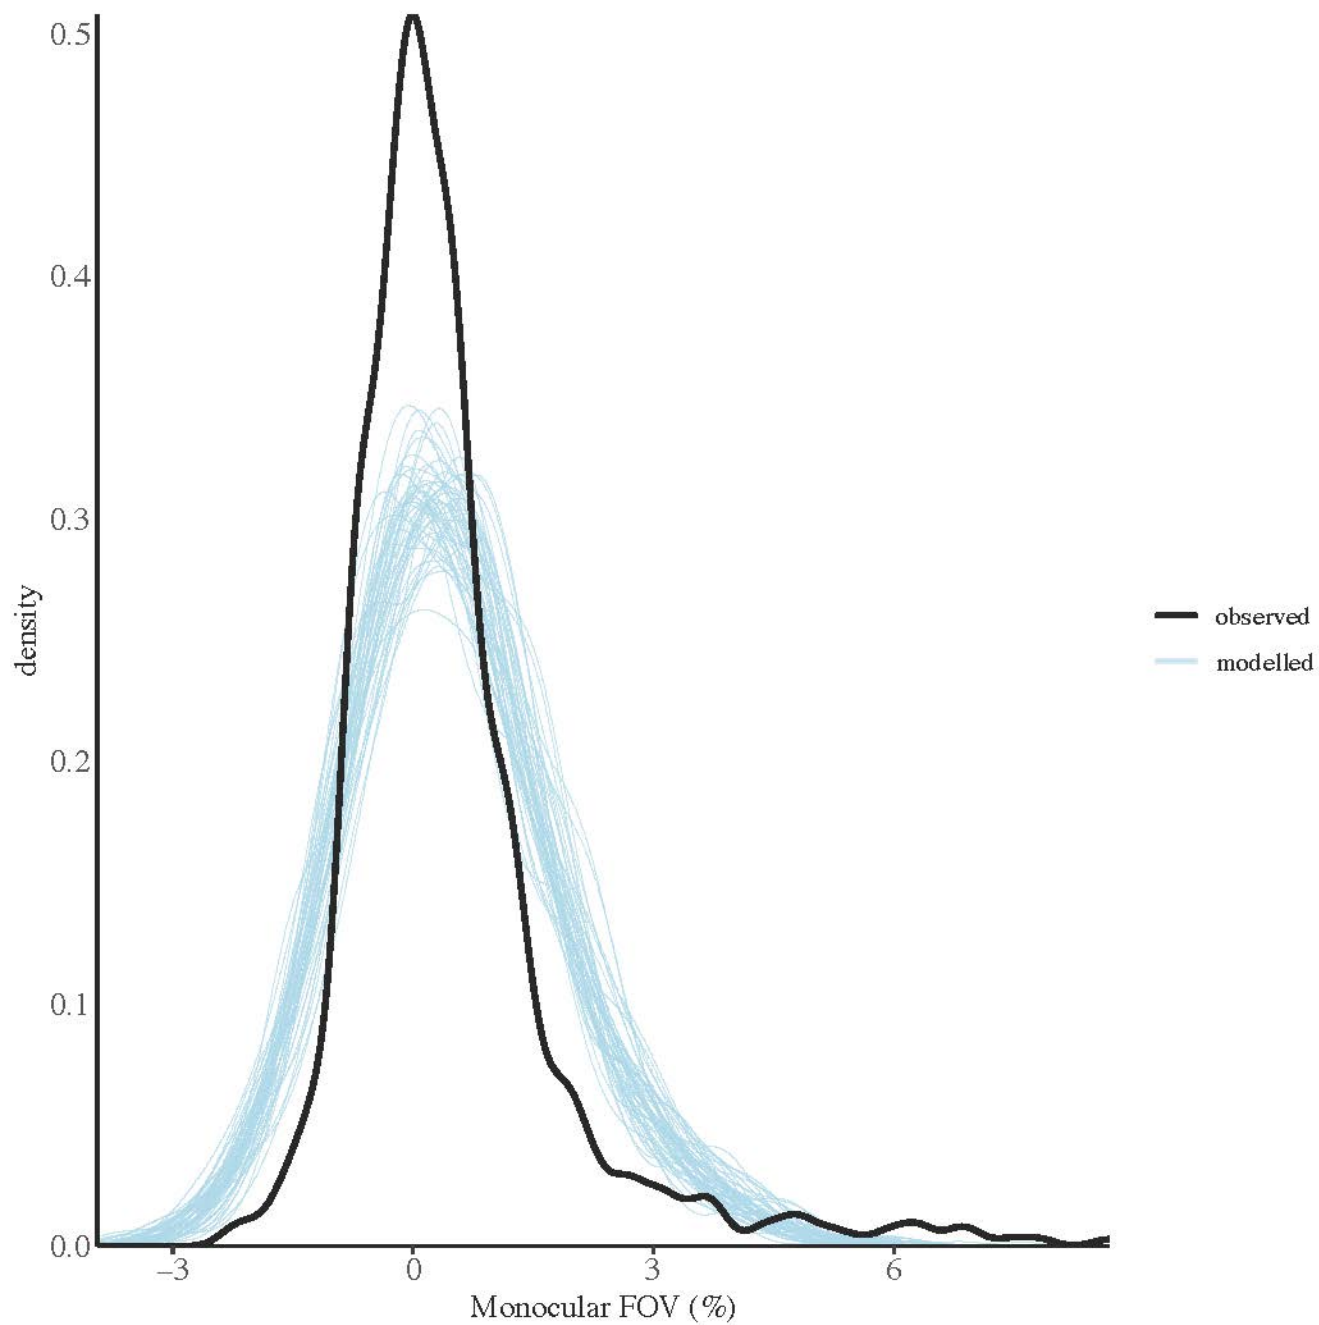

Binocular overlap (%)

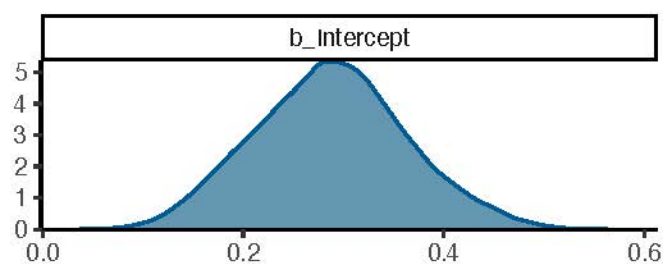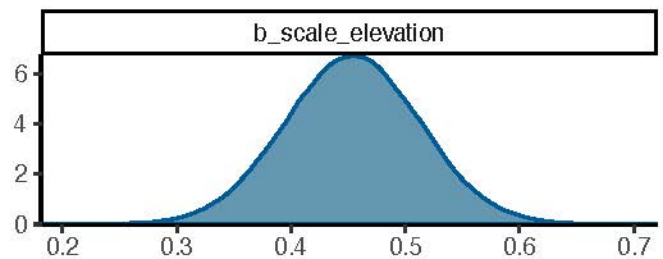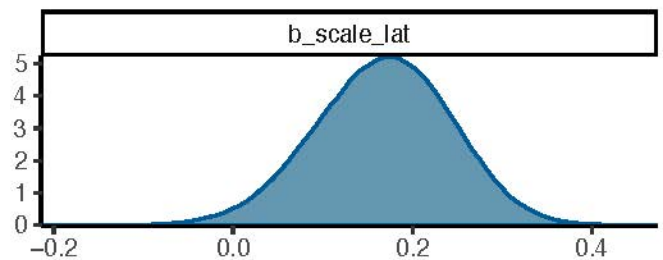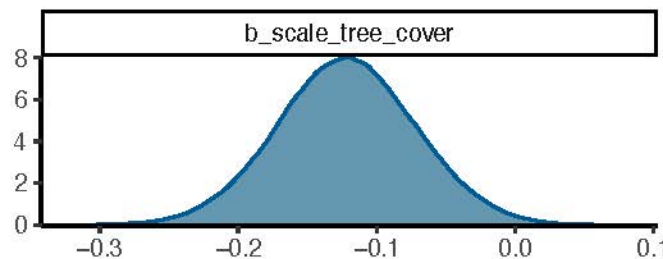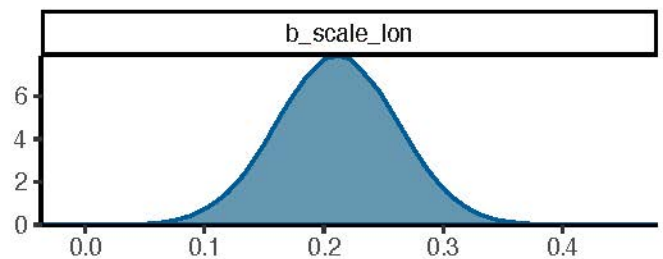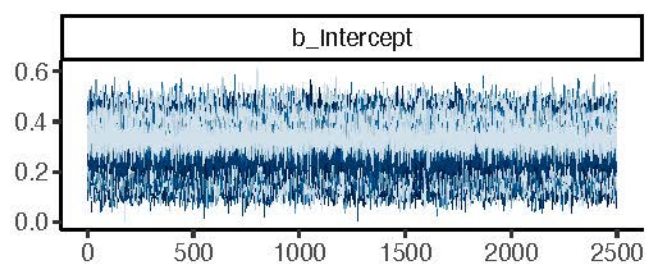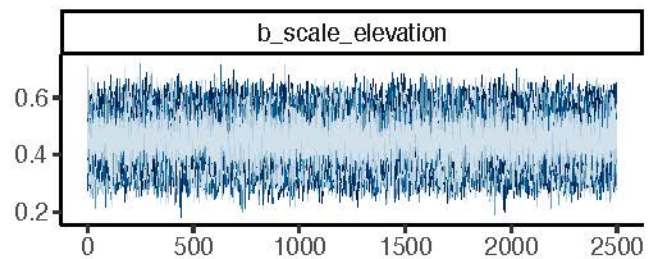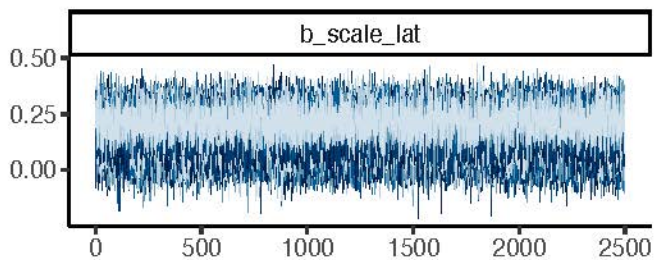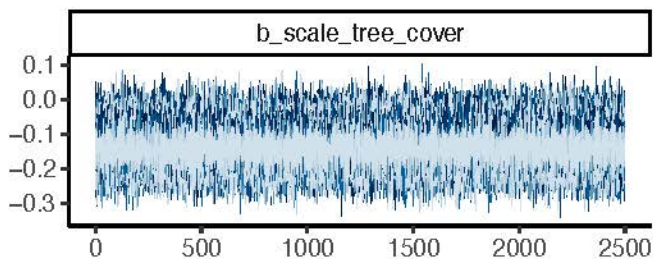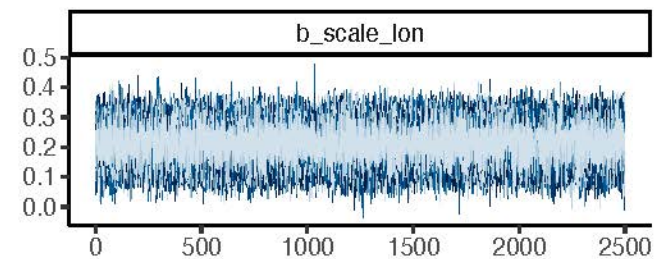



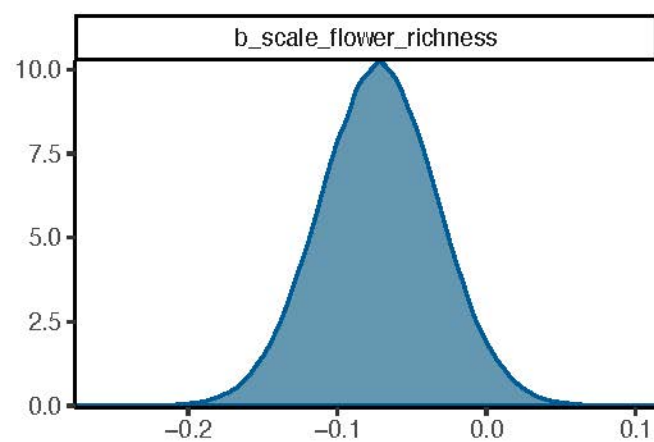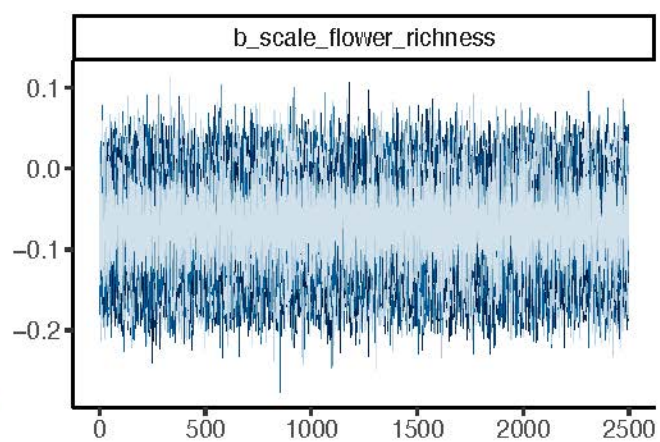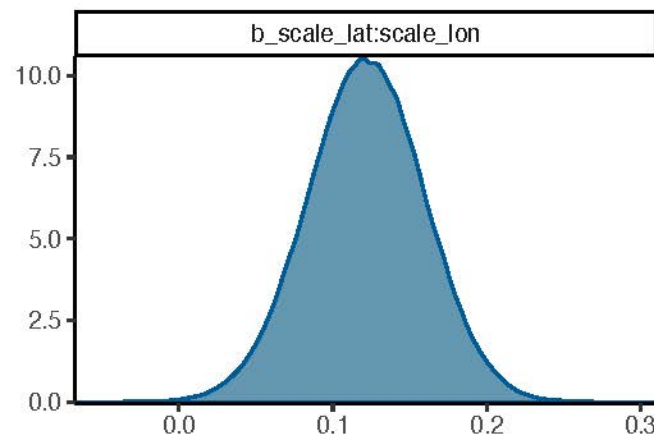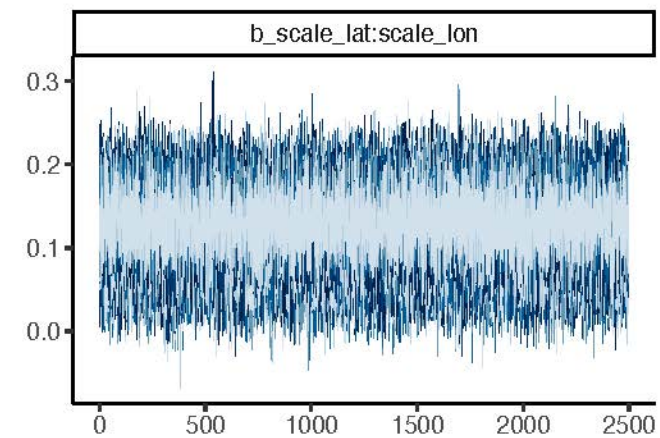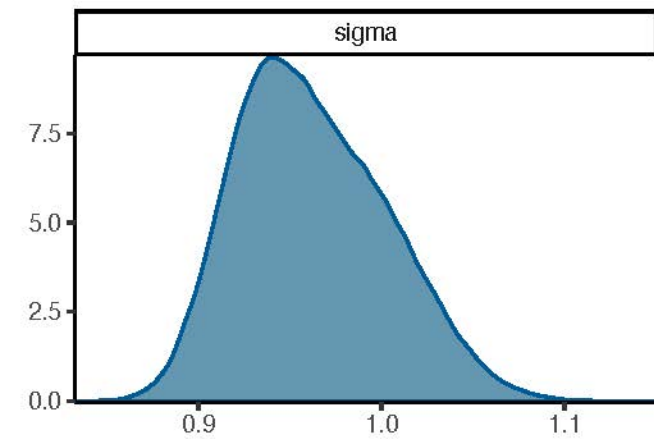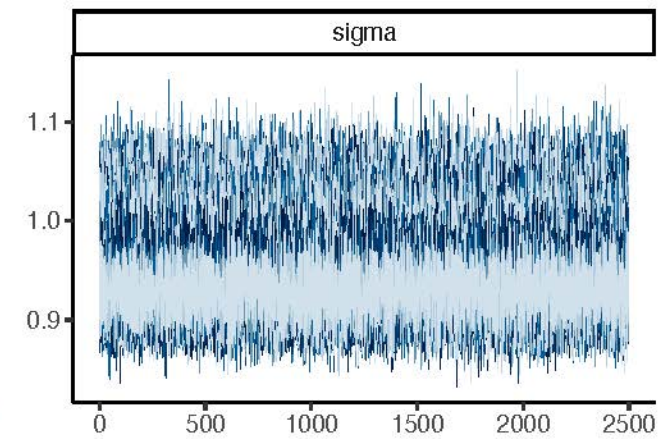

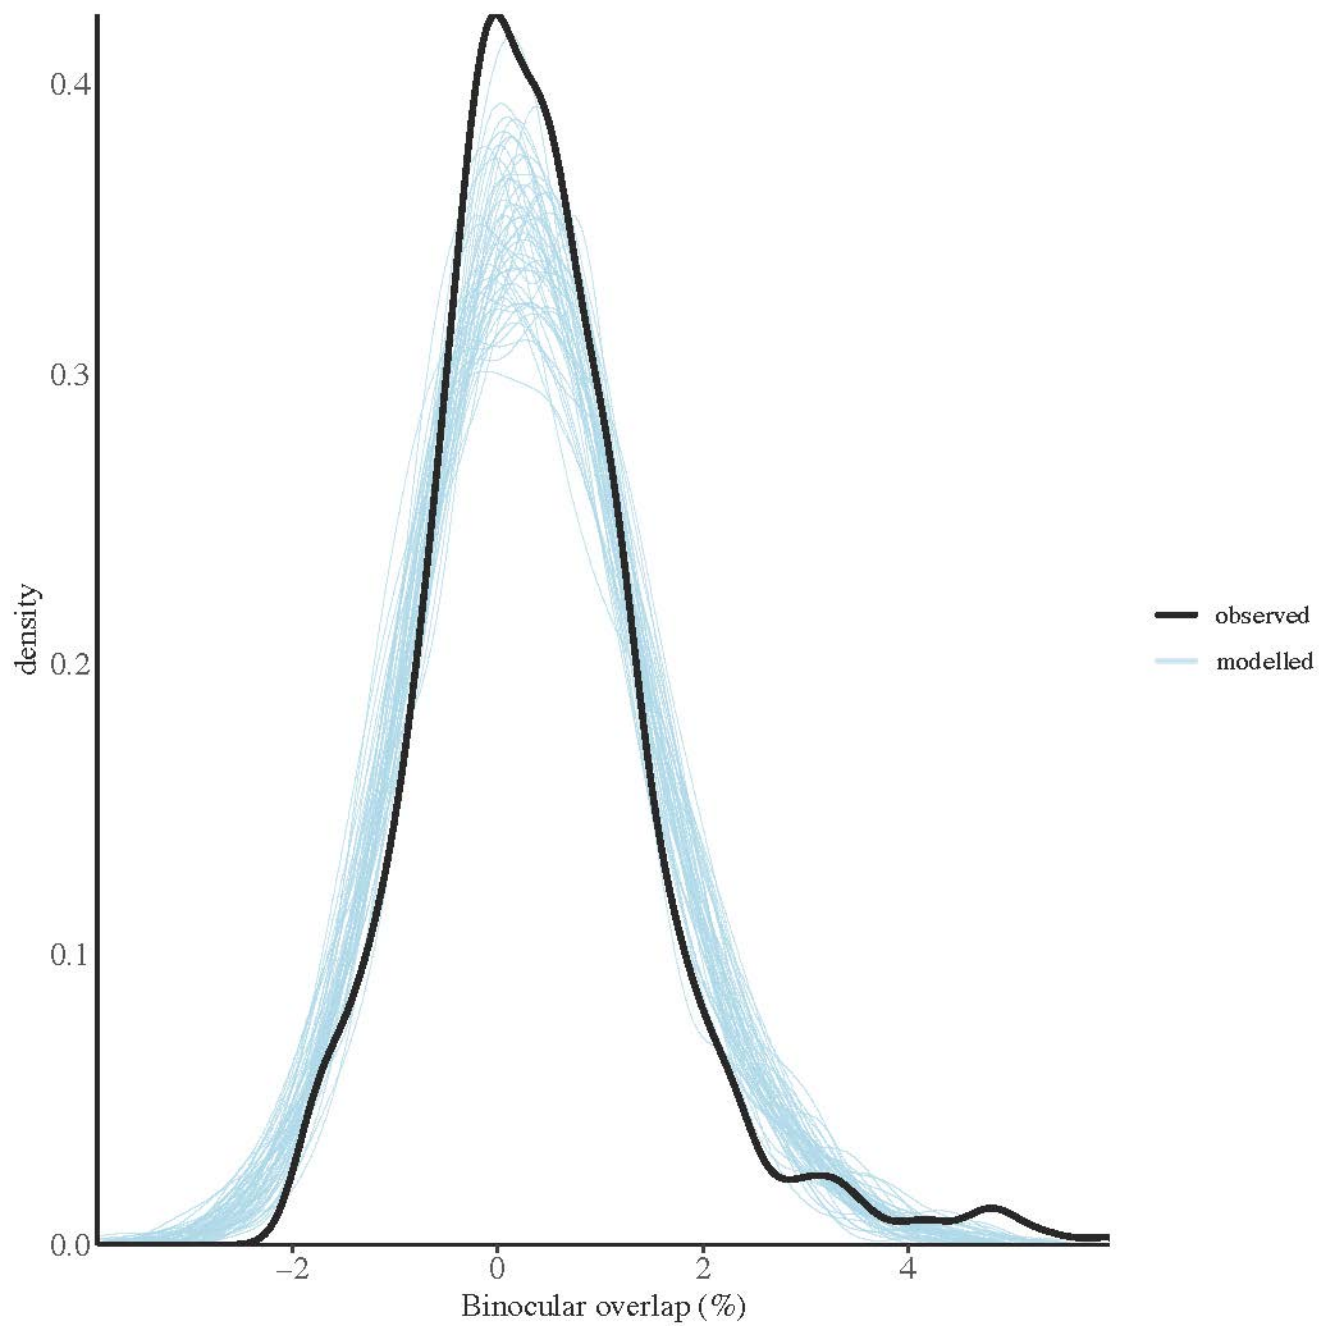

Supplement: ECE3-14-e70635-s002.pdf [file ECE3-14-e70635-s002.pdf]
