# Supplementary material for: The Interplay Between Visual Traits and Forest in Bumblebee Communities Across Sweden
Source: PubMed Central journal article supplement (PMC11664236; doi:10.1002/ece3.70635), 2024-12-23
Supplement: ECE3-14-e70635-s001.pdf [file ECE3-14-e70635-s001.pdf]

1 **Appendix for the article “The interplay between visual traits and forest in bumblebee**  
2 **communities across Sweden”**  
3  
4

5 **Text S1**

6 **Sample preparation.**

7 The left compound eyes of freshly collected specimens were dissected, transferred to a fixative  
8 solution of paraformaldehyde and glutaraldehyde, stained with osmium tetroxide, dehydrated  
9 with a graded alcohol series, and embedded in epoxy resin as described in Taylor et al. (2019).  
10 In a handful of cases where the left compound eye was damaged, the right compound eye was  
11 instead used. Specimens preserved in ethanol were directly dehydrated with a graded alcohol  
12 series followed by critical point drying. Bumblebee heads were dissected, fixated, dehydrated  
13 with a graded alcohol series and critical point dried.  
14

15 **Sample scanning.**

16 The average photon energy was approximately 22 keV, using the so called “pink beam”,  
17 filtering lower high and low harmonics of the undulator beam.  
18

19 **Volumetric and computational analysis.**

20 The original image stacks reconstructed from the scans were cropped and re-saved in 8-bit files  
21 in Drishti Paint (Limaye, 2012). In the present study, the inner layers of the compound eyes  
22 were not manually labelled. Instead, the entire eye and head volumes were segmented semi-  
23 automatically and the outer surface of the lens was labelled by manually drawing a geodesic  
24 path around the cornea. The labels and measurements obtained during volumetric analysis were  
25 imported to *MATLAB* (The MathWorks Inc., 2016) and analysed as in Taylor et al. (2019) with  
26 two differences: (1) the mirroring of a compound eye (either because it was a right instead of  
27 a left compound eye, or to obtain the binocular overlap on the field of view of the left compound  
28 eye) was performed by flipping the eye with respect to the plane of symmetry of the head and  
29 (2) the validation of calculation was less strict, as calculations were repeated until the number  
30 of simulated ommatidial axes was as close as possible to the facet number, but not necessarily  
31 with a 5 % margin.  
32

33 **Calculating visual traits.**

34 Ocellar visual traits were measured on the head registered in world coordinates in Amira. One  
35 vertical, one horizontal and two diagonal segments were drawn on the surface of each of the  
36 three ocelli. The 3D positions of the segments were imported to *MATLAB* and were used to  
37 calculate visual traits. In a few cases where ocelli and compound eye traits were measured on  
38 different specimens, ocellar diameters were scaled to match the size of the head used to  
39 measure compound eye traits.  
40

41 **Visual trait allometry.**

42 To control for phylogenetic relationships when fitting allometric models, we used a published  
43 high-resolution molecular phylogeny obtained from the analysis of nuclear and mitochondrial  
44 DNA sequences (Hines, 2008). The phylogeny was trimmed to a subset of 20 Swedish true  
45 bumblebee species for which visual traits were measured. The two subspecies of *B. pascuorum*  
46 *smithianus* and *B. pascuorum pallidofacies* were included and separated by an arbitrary small  
47 distance. The phylogeny was converted into a covariance matrix for statistical modelling.

48 Each of the eleven log transformed visual traits averaged per bumblebee species was  
49 modelled as a function of the log transformed ITD (simple allometric model). The procedure  
50 was repeated with the addition of phylogenetic covariance (phylogenetically controlled

1 allometric model). Response variables were drawn from a gaussian distribution. Flat uniform  
2 priors (over  $[-\infty; +\infty]$ ) were used to model the effects of predictors, a weakly informative group-  
3 level factor was drawn from a Student's t-distribution ( $df = 3$ , mean  $\mu = 0$ , s.d. = 2.5). Models  
4 were run using 4 chains for 5000 iterations (including 2500 to warm-up, which is sufficient  
5 given the high convergence speed of Bayesian algorithms in *brms* (Bürkner, 2017)). Traces of  
6 the sampling behaviour of each predictor were scrutinised to verify that there was little  
7 autocorrelation between successive iterations and that the models converged towards reliable  
8 predictions. A posterior predictive check was used to compare modelled and observed data and  
9 thus evaluate the quality of the models. The significance of each effect being different from  
10 zero was assessed using Bayesian 95 % credible intervals.

11 To calculate traits relative to body size, the residual of the simple allometric models were back  
12 transformed from log space using the following formula: Observed trait – exp(fitted trait).  
13

#### 14 **Inventories of bumblebee communities.**

15 Study grasslands were located in squares ( $n = 631$ ) systematically distributed across Sweden  
16 with an increasing size towards higher latitude to account for a decreasing agricultural activity  
17 (Sandring, 2023). Pollinator communities including bumblebees were inventoried every five  
18 years. The number of transects per site depended on the size of the grassland, there might be  
19 several transects per site, and thus a large variation in the cumulated length of transects (min =  
20 25 m, mean = 1200 m, max = 10000 m). Transects were aligned from South to North or East  
21 to West and set up parallel to each other at a distance of more than 20 m to avoid resampling  
22 the same individuals. Data collection took place only in favourable weather conditions ( $> 17$   
23 °C, little to no wind, no rain). Participants recorded every bumblebee encountered within 5 m  
24 either side of the transect while walking at a constant speed of approximately 50 m per min.  
25 When necessary, specimens were captured and euthanised to allow identification in the  
26 laboratory. The cryptic species *B. cryptarum* and *B. magnus* were registered as *B. lucorum*.  
27

#### 28 **Ecological indicators.**

29 NMD provides maps of 25 land cover categories with a 10 m resolution. Tree cover (in %) was  
30 calculated by aggregating all forest layers in NMD (categories 111 to 128) divided by the  
31 surface of a 2 km disk.  
32

#### 33 **Effects of tree cover on visual traits across communities.**

34 Longitude and latitudes were projected using a coordinate system that preserves true distances  
35 (SWEREF 99 TM). Flat uniform priors (over  $[-\infty; +\infty]$ ) were used to model the effects of  
36 predictors, a weakly informative group-level factor was drawn from a Student's t-distribution  
37 ( $df = 3$ , mean  $\mu = 0$ , s.d. = 2.5). Models were run using 3 chains for 5000 iterations (including  
38 2500 to warm-up, which is sufficient given the high convergence speed of Bayesian algorithms  
39 in *brms* (Bürkner, 2017)). Traces of the sampling behaviour of each predictor were scrutinised  
40 to verify that there was little autocorrelation between successive iterations and that the models  
41 converged towards reliable predictions. Posterior predictive checks were used to compare  
42 modelled and observed data and thus evaluate the quality of the models. The significance of  
43 each effect being different from zero was assessed using Bayesian 95 % credible intervals.  
44

45 When not otherwise specified, values are given as mean  $\pm$  s.d.  
46

#### 47 **References to text S1.**

48 Bürkner, P. C. (2017). *brms*: An R package for Bayesian multilevel models using Stan.  
49 *Journal of Statistical Software*, 80(1). <https://doi.org/10.18637/jss.v080.i01>

1 Hines, H. M. (2008). Historical biogeography, divergence times, and diversification patterns  
2 of bumble bees (Hymenoptera: Apidae: *Bombus*). *Systematic Biology*, 57(1), 58–75.  
3 <https://doi.org/10.1080/10635150801898912>  
4 Limaye, A. (2012). Drishti: a volume exploration and presentation tool. *Developments in X-  
5 Ray Tomography VIII*, 8506(October 2012), 85060X. <https://doi.org/10.1117/12.935640>  
6 Penone, C., Davidson, A. D., Shoemaker, K. T., Di Marco, M., Rondinini, C., Brooks, T. M.,  
7 Young, B. E., Graham, C. H., & Costa, G. C. (2014). Imputation of missing data in life-  
8 history trait datasets: which approach performs the best? *Methods in Ecology and  
9 Evolution*, 5(9), 961–970. <https://doi.org/10.1111/2041-210X.12232>  
10 Sandring, S. (2023). *Fältinstruktion för fjärilar och humlor i ängs- och betesmarker*.  
11 The MathWorks Inc. (2016). *MATLAB version: 9.1.0 (R2016b)*. The MathWorks Inc.

12  
13 **Table S1. Dataset of visual traits and body size (ITD) for workers of 20 species (including**  
14 **two subspecies) of *Bombus* present in Sweden. These values were quantified using a**  
15 **combination of micro-CT imaging and optical modelling, and averaged over N replicates per**  
16 **species.**  
17

| Species                           | N | ITD (mm) | Eye surface ( $\mu\text{m}^2$ ) | Facet number | Facet diameter ( $\mu\text{m}$ ) | Inter-ommatidial angle ( $^\circ$ ) | Curvature ( $\mu\text{m}$ ) | Eye parameter ( $\mu\text{m}\cdot\text{rad}$ ) | Monocular FOV (%) | Binocular overlap (%) | Central ocellus diameter ( $\mu\text{m}$ ) | Lateral ocelli diameter ( $\mu\text{m}$ ) | Ocellar alignment ( $^\circ$ ) |
|-----------------------------------|---|----------|---------------------------------|--------------|----------------------------------|-------------------------------------|-----------------------------|------------------------------------------------|-------------------|-----------------------|--------------------------------------------|-------------------------------------------|--------------------------------|
| <i>B. alpinus</i>                 | 3 | 5.6      | 2319826                         | 4701         | 23.8                             | 1.73                                | 847.2                       | 0.72                                           | 21.5              | 6.3                   | 268.2                                      | 246.6                                     | 156.8                          |
| <i>B. balteatus</i>               | 4 | 5.3      | 2862842                         | 5217         | 24.8                             | 1.62                                | 938.6                       | 0.70                                           | 20.9              | 8.5                   | 306.8                                      | 267.2                                     | 159.5                          |
| <i>B. cingulatus</i>              | 2 | 4.0      | 1580979                         | 3919         | 21.5                             | 2.00                                | 657.9                       | 0.75                                           | 23.1              | 6.7                   | 197.5                                      | 184.0                                     | 168.5                          |
| <i>B. consobrinus</i>             | 1 | 5.0      | 2839101                         | 5425         | 24.5                             | 1.79                                | 816.5                       | 0.77                                           | 24.6              | 6.7                   | 235.0                                      | 210.4                                     | 152.3                          |
| <i>B. hortorum</i>                | 3 | 5.0      | 2876512                         | 5365         | 24.7                             | 1.81                                | 823.8                       | 0.79                                           | 25.8              | 6.9                   | 238.1                                      | 216.7                                     | 152.7                          |
| <i>B. hypnorum</i>                | 1 | 4.7      | 2290451                         | 5033         | 22.9                             | 1.82                                | 761.1                       | 0.73                                           | 24.0              | 7.8                   | 231.6                                      | 210.0                                     | 145.9                          |
| <i>B. jonellus</i>                | 1 | 3.7      | 1581194                         | 4737         | 19.7                             | 2.20                                | 549.5                       | 0.76                                           | 34.1              | 11.6                  | 164.9                                      | 174.0                                     | 139.5                          |
| <i>B. lapidarius</i>              | 1 | 5.0      | 1937442                         | 4555         | 22.1                             | 1.79                                | 742.7                       | 0.69                                           | 21.3              | 4.0                   | 233.9                                      | 208.7                                     | 153.3                          |
| <i>B. lapponicus</i>              | 1 | 4.4      | 1805178                         | 4137         | 22.4                             | 1.89                                | 718.2                       | 0.74                                           | 21.1              | 4.9                   | 256.9                                      | 230.1                                     | 154.1                          |
| <i>B. lucorum</i>                 | 1 | 5.2      | 2553696                         | 5317         | 23.5                             | 1.69                                | 840.5                       | 0.69                                           | 22.6              | 6.8                   | 256.0                                      | 224.3                                     | 158.7                          |
| <i>B. monticola</i>               | 1 | 4.6      | 1977935                         | 4780         | 21.8                             | 1.75                                | 763.2                       | 0.67                                           | 22.5              | 7.5                   | 252.9                                      | 219.6                                     | 157.1                          |
| <i>B. muscorum</i>                | 1 | 4.5      | 2383976                         | 5602         | 22.1                             | 1.64                                | 785.9                       | 0.64                                           | 20.3              | 2.2                   | 251.5                                      | 231.4                                     | 130.7                          |
| <i>B. pascuorum pallidofacies</i> | 3 | 3.9      | 2250633                         | 4625         | 23.6                             | 1.95                                | 724.3                       | 0.81                                           | 24.4              | 5.3                   | 227.7                                      | 206.7                                     | 134.3                          |
| <i>B. pascuorum smithianus</i>    | 1 | 4.3      | 2234906                         | 4944         | 22.8                             | 1.77                                | 763.6                       | 0.71                                           | 22.5              | 2.6                   | 235.4                                      | 204.3                                     | 130.6                          |
| <i>B. pratorum</i>                | 1 | 4.0      | 1862308                         | 4264         | 22.4                             | 2.09                                | 649.9                       | 0.82                                           | 25.5              | 7.1                   | 209.8                                      | 209.7                                     | 166.9                          |
| <i>B. pyrrhopygus</i>             | 1 | 4.9      | 1947825                         | 4464         | 22.4                             | 1.69                                | 817.3                       | 0.66                                           | 20.6              | 5.5                   | 287.9                                      | 255.4                                     | 159.0                          |
| <i>B. soroeensis</i>              | 1 | 3.8      | 1579786                         | 4143         | 20.9                             | 1.93                                | 645.1                       | 0.71                                           | 22.8              | 5.6                   | 217.8                                      | 204.0                                     | 150.7                          |
| <i>B. subterraneus</i>            | 1 | 4.7      | 2533570                         | 5927         | 22.2                             | 1.58                                | 829.9                       | 0.61                                           | 19.8              | 3.6                   | 260.3                                      | 210.3                                     | 149.0                          |
| <i>B. sylvarum</i>                | 1 | 4.2      | 2190375                         | 5360         | 21.6                             | 1.73                                | 742.2                       | 0.66                                           | 22.4              | 3.9                   | 245.3                                      | 195.0                                     | 121.1                          |
| <i>B. terrestris</i>              | 6 | 4.0      | 2527738                         | 5592         | 22.4                             | 1.71                                | 811.3                       | 0.67                                           | 25.0              | 7.6                   | 257.2                                      | 237.1                                     | 157.8                          |
| <i>B. wurflenii</i>               | 1 | 4.7      | 2134739                         | 4984         | 22.2                             | 1.70                                | 790.0                       | 0.66                                           | 21.3              | 5.7                   | 239.0                                      | 220.8                                     | 160.9                          |

18  
19

1 **Figure S1. Distribution of missing visual trait data across communities** (n = 812) from zero  
 2 (no specimen had measured visual traits) to 100 % (all specimens in the community had  
 3 measured visual traits).  
 4

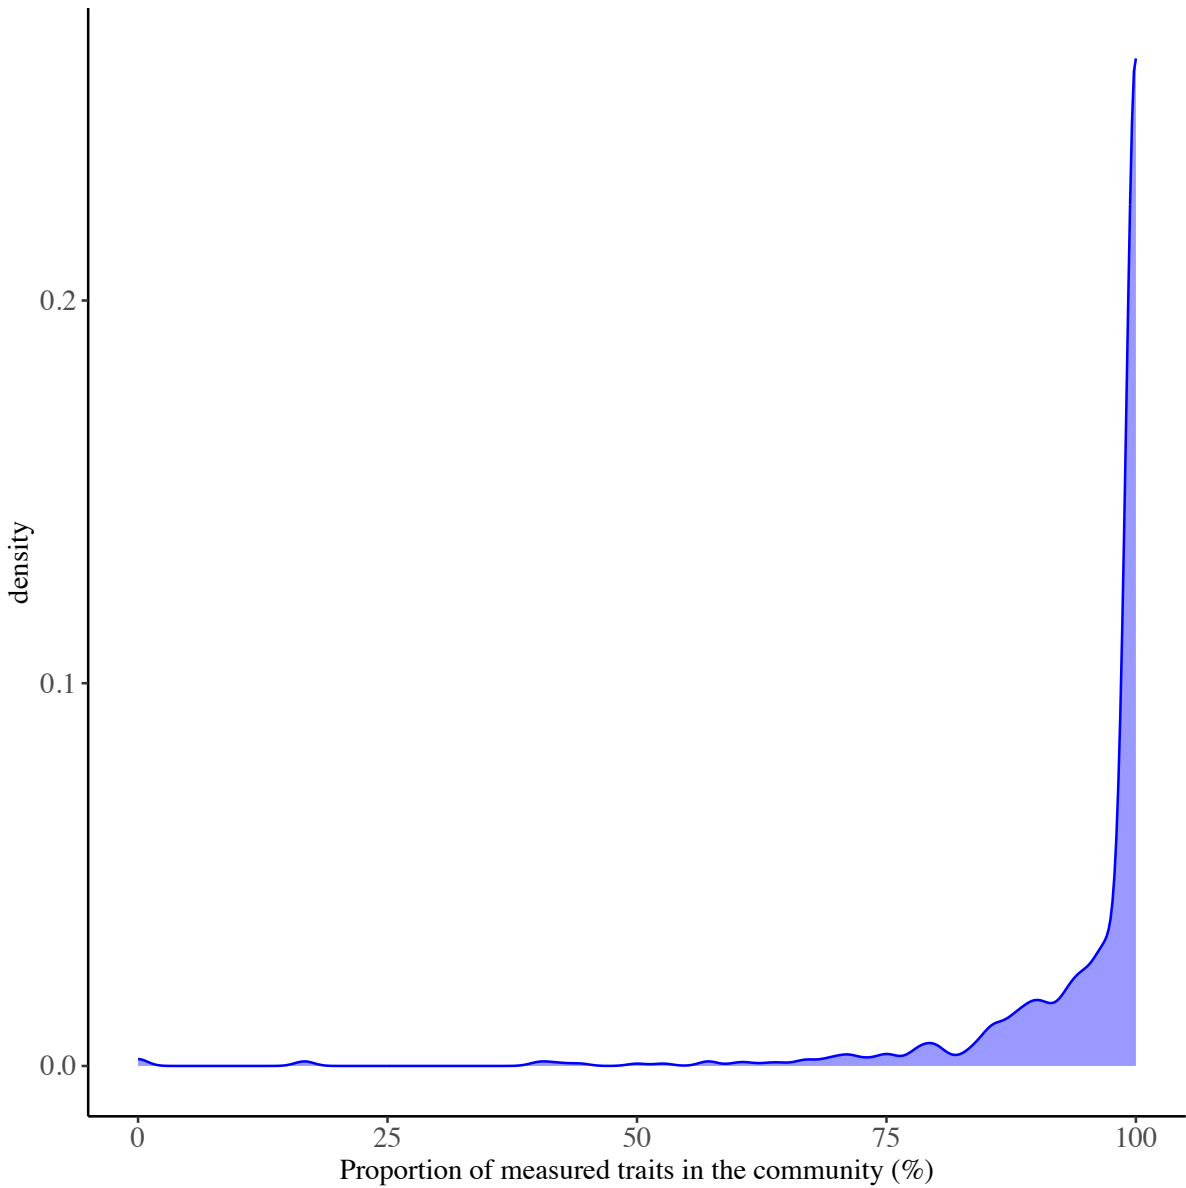

5  
 6  
 7 **Table S2. Average of visual traits and body size (ITD) for workers of 20 species** (including  
 8 two subspecies) of *Bombus* present in Sweden. These values were quantified using a  
 9 combination of micro-CT imaging and optical modelling, and averaged over 20 species.

10

|      | ITD (mm) | Eye surface ( $\mu\text{m}^2$ ) | Facet number | Facet diameter ( $\mu\text{m}$ ) | Inter-ommatidial angle ( $^\circ$ ) | Curvature ( $\mu\text{m}$ ) | Eye parameter ( $\mu\text{m}\cdot\text{rad}$ ) | Monocular FOV (%) | Binocular overlap (%) | Central ocellus diameter ( $\mu\text{m}$ ) | Lateral ocelli diameter ( $\mu\text{m}$ ) | Ocellar alignment ( $^\circ$ ) |
|------|----------|---------------------------------|--------------|----------------------------------|-------------------------------------|-----------------------------|------------------------------------------------|-------------------|-----------------------|--------------------------------------------|-------------------------------------------|--------------------------------|
| mean | 4.5      | 2203381                         | 4909         | 22.6                             | 1.80                                | 762.8                       | 0.71                                           | 23.1              | 6.0                   | 241.6                                      | 217.43                                    | 150.45                         |
| s.d. | 0.5      | 407190                          | 548          | 1.2                              | 0.16                                | 86.4                        | 0.06                                           | 3.1               | 2.2                   | 30.2                                       | 22.18                                     | 12.55                          |

11  
 12 **Table S3. Repeatability of visual trait measurements.** Repeatability was the ratio of trait  
 13 variance explained by interspecific differences from a general linear mixed-effects model with

body size as a fixed effect and species as a grouping factor. The model was performed on compound eye traits of six species for which replicates were available (n = 21 specimens).

|                        | Repeatability |
|------------------------|---------------|
| Eye surface            | 0.55          |
| Facet diameter         | 0.65          |
| Inter-ommatidial angle | 0.85          |
| Facet number           | 0.62          |
| Eye parameter          | 0.80          |
| Eye curvature          | 0.76          |
| Monocular FOV          | 0.76          |
| Binocular overlap      | 0.51          |

**Table S4. Summary of the allometric scaling of visual traits with body size** modelled with Bayesian inference without phylogenetic control (Estimate: estimated effect, l-95 % CI: lowest 95 % credible interval, u-95 % CI: upper 95 % credible interval). Significantly positive and negative effects scaling are highlighted in red and blue respectively. Visual traits and ITD were log transformed to account for non-isometric scaling, such that we modelled solutions to the equation: Trait = log  $b$  +  $a$  × log ITD.

|                          |          | Intercept (log $b$ ) | Scaling exponent ( $a$ ) |
|--------------------------|----------|----------------------|--------------------------|
| Eye surface              | Estimate | 13.11                | 0.98                     |
|                          | l-95% CI | 12.18                | 0.36                     |
|                          | u-95% CI | 14.05                | 1.60                     |
| Facet diameter           | Estimate | 2.64                 | 0.32                     |
|                          | l-95% CI | 2.38                 | 0.15                     |
|                          | u-95% CI | 2.90                 | 0.49                     |
| Inter-ommatidial angle   | Estimate | 1.30                 | -0.48                    |
|                          | l-95% CI | 0.89                 | -0.74                    |
|                          | u-95% CI | 1.71                 | -0.21                    |
| Facet number             | Estimate | 7.98                 | 0.34                     |
|                          | l-95% CI | 7.30                 | -0.11                    |
|                          | u-95% CI | 8.65                 | 0.79                     |
| Eye parameter            | Estimate | -0.10                | -0.16                    |
|                          | l-95% CI | -0.58                | -0.47                    |
|                          | u-95% CI | 0.37                 | 0.15                     |
| Eye curvature            | Estimate | 5.41                 | 0.81                     |
|                          | l-95% CI | 4.95                 | 0.52                     |
|                          | u-95% CI | 5.85                 | 1.11                     |
| Central ocellus diameter | Estimate | 4.34                 | 0.76                     |
|                          | l-95% CI | 3.75                 | 0.37                     |

|                         |          |       |       |
|-------------------------|----------|-------|-------|
|                         | u-95% CI | 4.93  | 1.15  |
|                         | Estimate | 4.54  | 0.55  |
| Lateral ocelli diameter | l-95% CI | 4.06  | 0.23  |
|                         | u-95% CI | 5.03  | 0.87  |
|                         | Estimate | 4.67  | 0.23  |
| Ocellar alignment       | l-95% CI | 4.16  | -0.11 |
|                         | u-95% CI | 5.18  | 0.56  |
|                         | Estimate | 3.91  | -0.51 |
| Monocular FOV           | l-95% CI | 3.26  | -0.94 |
|                         | u-95% CI | 4.56  | -0.08 |
|                         | Estimate | 1.80  | -0.05 |
| Binocular overlap       | l-95% CI | -0.70 | -1.70 |
|                         | u-95% CI | 4.29  | 1.63  |

1  
2  
3  
4  
5  
6  
7  
8  
9

**Figure S2. Phylogenetic signals in allometric relationships.** Distribution of the percentage of residual variance accounted by the phylogenetic covariance matrix modelled with Bayesian inference. Colours correspond to the significance of the scaling exponent in the allometric relationship without the phylogenetic control (red: positive, blue: negative, grey: no significance).

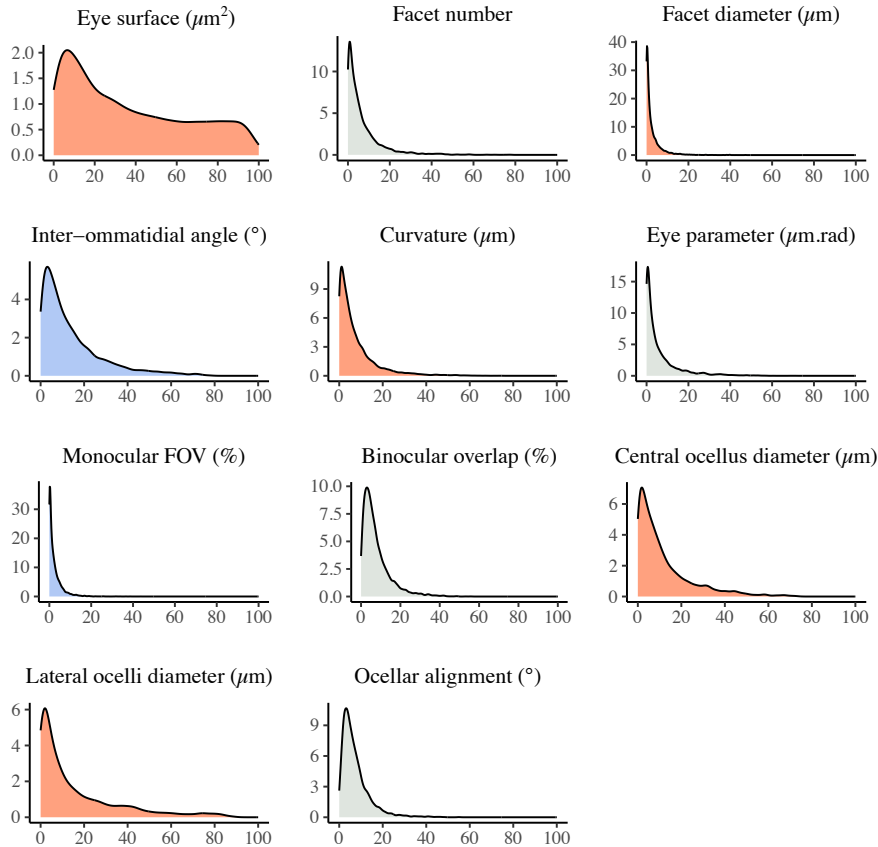

10  
11

1  
2  
3  
4  
5  
6  
7  
8

**Table S5. Summary of the effects of geophysical variables, tree cover and covariates on the community-weighted means of visual traits and body size, and on species richness and single species abundances modelled with Bayesian inference (Estimate: estimated effect, 1-95 % CI: lowest 95 % credible interval, u-95 % CI: upper 95 % credible interval). Significantly positive and negative effects are drawn in red and blue respectively, while non-significant relationships are in grey.**

|                          |          | Intercept | Elevation | Latitude  | Tree cover | Longitude | Floral resource | Latitude x Longitude |
|--------------------------|----------|-----------|-----------|-----------|------------|-----------|-----------------|----------------------|
| Eye surface              | Estimate | 2.22E+06  | -5.40E+04 | -1.10E+04 | -1.25E+04  | -1.40E+03 | -7.39E+03       | -2.10E+04            |
|                          | 1-95% CI | 2.19E+06  | -7.47E+04 | -3.70E+04 | -2.87E+04  | -1.87E+04 | -2.11E+04       | -3.45E+04            |
|                          | u-95% CI | 2.24E+06  | -3.30E+04 | 1.63E+04  | 3.67E+03   | 1.59E+04  | 6.05E+03        | -7.49E+03            |
| Facet diameter           | Estimate | 2.28E+01  | -2.35E-01 | 4.11E-02  | 1.62E-01   | -7.45E-02 | -3.26E-02       | -9.53E-02            |
|                          | 1-95% CI | 2.27E+01  | -3.00E-01 | -4.61E-02 | 1.12E-01   | -1.31E-01 | -7.63E-02       | -1.37E-01            |
|                          | u-95% CI | 2.28E+01  | -1.68E-01 | 1.28E-01  | 2.14E-01   | -1.87E-02 | 1.04E-02        | -5.15E-02            |
| Inter-ommatidial angle   | Estimate | 1.85E+00  | 3.36E-02  | 9.92E-03  | 2.45E-02   | 1.26E-03  | -4.73E-03       | 1.22E-02             |
|                          | 1-95% CI | 1.84E+00  | 2.48E-02  | -1.48E-03 | 1.80E-02   | -6.27E-03 | -1.04E-02       | 6.43E-03             |
|                          | u-95% CI | 1.86E+00  | 4.22E-02  | 2.15E-02  | 3.09E-02   | 8.77E-03  | 1.06E-03        | 1.79E-02             |
| Facet number             | Estimate | 4.89E+03  | -2.60E+01 | -3.33E+01 | -9.75E+01  | 2.64E+01  | -2.45E+00       | -7.31E+00            |
|                          | 1-95% CI | 4.85E+03  | -5.49E+01 | -7.04E+01 | -1.20E+02  | 1.56E+00  | -2.14E+01       | -2.60E+01            |
|                          | u-95% CI | 4.93E+03  | 2.87E+00  | 4.33E+00  | -7.47E+01  | 5.12E+01  | 1.64E+01        | 1.18E+01             |
| Eye parameter            | Estimate | 7.37E-01  | 3.82E-03  | 4.18E-03  | 1.55E-02   | -2.63E-03 | -2.70E-03       | 9.83E-04             |
|                          | 1-95% CI | 7.33E-01  | 2.97E-04  | -2.44E-04 | 1.29E-02   | -5.65E-03 | -5.00E-03       | -1.30E-03            |
|                          | u-95% CI | 7.40E-01  | 7.26E-03  | 8.74E-03  | 1.82E-02   | 4.02E-04  | -3.55E-04       | 3.25E-03             |
| Eye curvature            | Estimate | 7.46E+02  | -1.66E+01 | -2.16E+00 | -5.63E+00  | -1.08E+00 | -3.49E-02       | -6.42E+00            |
|                          | 1-95% CI | 7.39E+02  | -2.10E+01 | -8.48E+00 | -9.12E+00  | -5.10E+00 | -3.11E+00       | -9.36E+00            |
|                          | u-95% CI | 7.50E+02  | -1.19E+01 | 3.97E+00  | -1.83E+00  | 2.88E+00  | 2.94E+00        | -3.32E+00            |
| Central ocellus diameter | Estimate | 2.34E+02  | -5.66E+00 | -1.56E+00 | -1.84E+00  | -8.54E-01 | 4.16E-01        | -2.04E+00            |
|                          | 1-95% CI | 2.32E+02  | -6.96E+00 | -3.42E+00 | -2.86E+00  | -1.97E+00 | -4.79E-01       | -2.93E+00            |
|                          | u-95% CI | 2.36E+02  | -4.26E+00 | 4.05E-01  | -8.23E-01  | 2.57E-01  | 1.27E+00        | -1.10E+00            |
| Lateral ocelli diameter  | Estimate | 2.13E+02  | -2.50E+00 | -1.16E+00 | -1.71E-01  | -1.11E-01 | -5.46E-02       | -1.24E+00            |
|                          | 1-95% CI | 2.11E+02  | -3.49E+00 | -2.32E+00 | -1.02E+00  | -9.02E-01 | -7.04E-01       | -1.86E+00            |
|                          | u-95% CI | 2.15E+02  | -1.46E+00 | 8.62E-02  | 6.42E-01   | 6.70E-01  | 5.76E-01        | -5.56E-01            |
| Ocellar alignment        | Estimate | 1.49E+02  | -1.37E-01 | 7.29E-01  | 7.55E-01   | 9.84E-02  | -1.40E-02       | -3.93E-01            |
|                          | 1-95% CI | 1.48E+02  | -8.64E-01 | -2.19E-01 | 2.13E-01   | -5.39E-01 | -5.10E-01       | -8.66E-01            |
|                          | u-95% CI | 1.50E+02  | 6.24E-01  | 1.64E+00  | 1.35E+00   | 7.33E-01  | 4.67E-01        | 8.55E-02             |
| Monocular FOV            | Estimate | 2.41E+01  | 8.27E-01  | 3.94E-02  | -3.72E-02  | 2.78E-01  | -1.28E-01       | 2.86E-01             |
|                          | 1-95% CI | 2.39E+01  | 6.62E-01  | -1.55E-01 | -1.83E-01  | 1.48E-01  | -2.28E-01       | 1.85E-01             |
|                          | u-95% CI | 2.43E+01  | 9.82E-01  | 2.90E-01  | 7.83E-02   | 4.09E-01  | -2.20E-02       | 3.91E-01             |
| Binocular overlap        | Estimate | 6.27E+00  | 4.39E-01  | 1.39E-01  | -3.09E-02  | 1.95E-01  | -1.00E-01       | 1.19E-01             |
|                          | 1-95% CI | 6.13E+00  | 3.32E-01  | 8.75E-03  | -1.25E-01  | 1.08E-01  | -1.70E-01       | 5.24E-02             |
|                          | u-95% CI | 6.42E+00  | 5.44E-01  | 2.63E-01  | 5.62E-02   | 2.82E-01  | -3.02E-02       | 1.84E-01             |

|                                  |          |           |           |           |           |           |           |           |
|----------------------------------|----------|-----------|-----------|-----------|-----------|-----------|-----------|-----------|
| ITD                              | Estimate | 3.96E+00  | -8.40E-02 | -2.28E-02 | -5.76E-03 | -8.43E-03 | 4.41E-03  | -2.70E-02 |
|                                  | 1-95% CI | 3.94E+00  | -1.00E-01 | -4.24E-02 | -1.77E-02 | -2.36E-02 | -6.74E-03 | -3.74E-02 |
|                                  | u-95% CI | 3.97E+00  | -6.77E-02 | -3.24E-03 | 6.11E-03  | 6.61E-03  | 1.56E-02  | -1.67E-02 |
| Observed species number          | Estimate | 1.68E+00  | 1.22E-02  | 8.45E-02  | -9.15E-03 | -7.25E-03 | 1.46E-01  | -4.33E-02 |
|                                  | 1-95% CI | 1.65E+00  | -3.51E-02 | 2.85E-02  | -4.35E-02 | -5.15E-02 | 1.14E-01  | -7.38E-02 |
|                                  | u-95% CI | 1.72E+00  | 5.93E-02  | 1.40E-01  | 2.57E-02  | 3.81E-02  | 1.80E-01  | -1.23E-02 |
| <i>B. ruderarius</i> (abundance) | Estimate | -8.70E-01 | -4.37E-01 | 5.55E-02  | -1.88E-01 | -3.94E-02 | 3.60E-01  | 6.83E-01  |
|                                  | 1-95% CI | -1.64E+00 | -1.42E+00 | -5.86E-01 | -5.71E-01 | -5.11E-01 | 1.48E-01  | 8.10E-02  |
|                                  | u-95% CI | -2.46E-01 | 4.59E-01  | 6.88E-01  | 1.88E-01  | 4.47E-01  | 5.84E-01  | 1.29E+00  |
| <i>B. sporadicus</i> (abundance) | Estimate | -6.49E-01 | -2.39E-01 | 7.94E-01  | 8.07E-02  | -2.53E-02 | 3.06E-01  | -7.42E-02 |
|                                  | 1-95% CI | -1.98E+00 | -8.96E-01 | -2.32E-01 | -4.56E-01 | -1.67E+00 | 2.79E-02  | -6.36E-01 |
|                                  | u-95% CI | 6.03E-01  | 4.14E-01  | 1.85E+00  | 6.22E-01  | 1.55E+00  | 5.98E-01  | 4.92E-01  |
| <i>B. hortorum</i> (abundance)   | Estimate | -6.95E-01 | 2.38E-01  | -2.58E-01 | 7.81E-02  | -1.19E-01 | 4.35E-01  | 2.57E-01  |
|                                  | 1-95% CI | -1.10E+00 | -1.64E-01 | -7.57E-01 | -1.99E-01 | -5.17E-01 | 3.01E-01  | 1.85E-02  |
|                                  | u-95% CI | -3.42E-01 | 6.28E-01  | 2.45E-01  | 3.56E-01  | 2.76E-01  | 5.75E-01  | 4.94E-01  |
| <i>B. hypnorum</i> (abundance)   | Estimate | -2.05E-01 | -1.96E-01 | 6.04E-01  | 2.19E-01  | -2.86E-01 | 3.66E-01  | 1.74E-02  |
|                                  | 1-95% CI | -4.86E-01 | -4.44E-01 | 3.06E-01  | -3.73E-03 | -5.80E-01 | 2.30E-01  | -1.28E-01 |
|                                  | u-95% CI | 5.17E-02  | 5.00E-02  | 9.22E-01  | 4.40E-01  | 2.61E-03  | 5.05E-01  | 1.61E-01  |
| <i>B. sylvorum</i> (abundance)   | Estimate | -5.29E-01 | -5.75E-01 | -3.30E-01 | -3.56E-01 | -7.27E-01 | 7.71E-01  | -4.84E-01 |
|                                  | 1-95% CI | -9.75E-01 | -1.18E+00 | -8.21E-01 | -6.42E-01 | -1.07E+00 | 6.45E-01  | -1.00E+00 |
|                                  | u-95% CI | -1.35E-01 | 4.60E-03  | 1.68E-01  | -7.56E-02 | -4.00E-01 | 9.07E-01  | 1.75E-02  |
| <i>B. jonellus</i> (abundance)   | Estimate | -3.35E-01 | 3.67E-01  | 3.58E-01  | 7.63E-02  | 1.46E-01  | 2.60E-01  | 1.39E-01  |
|                                  | 1-95% CI | -7.99E-01 | 6.54E-02  | -4.42E-02 | -2.35E-01 | -3.16E-01 | 1.41E-01  | -7.14E-02 |
|                                  | u-95% CI | 8.21E-02  | 6.75E-01  | 7.66E-01  | 3.92E-01  | 6.25E-01  | 3.81E-01  | 3.44E-01  |
| <i>B. soroensis</i> (abundance)  | Estimate | 3.60E-01  | -2.84E-01 | 1.52E-01  | 2.26E-01  | -3.89E-01 | 3.49E-01  | 1.94E-02  |
|                                  | 1-95% CI | 1.20E-01  | -6.08E-01 | -1.33E-01 | 5.06E-04  | -6.54E-01 | 2.23E-01  | -1.90E-01 |
|                                  | u-95% CI | 5.86E-01  | 3.26E-02  | 4.32E-01  | 4.55E-01  | -1.27E-01 | 4.76E-01  | 2.26E-01  |
| <i>B. lapidarius</i> (abundance) | Estimate | 2.77E-02  | 1.29E-01  | -3.63E-01 | -2.67E-01 | 2.73E-02  | 4.62E-01  | 3.38E-01  |
|                                  | 1-95% CI | -2.26E-01 | -1.91E-01 | -6.61E-01 | -4.49E-01 | -2.29E-01 | 3.67E-01  | 7.22E-03  |
|                                  | u-95% CI | 2.55E-01  | 4.43E-01  | -6.58E-02 | -8.51E-02 | 2.95E-01  | 5.57E-01  | 6.61E-01  |
| <i>B. terrestris</i> (abundance) | Estimate | 4.63E-01  | 1.76E-01  | -6.31E-01 | -1.48E-01 | 1.44E-01  | 3.31E-01  | -2.34E-03 |
|                                  | 1-95% CI | 2.45E-01  | -1.35E-01 | -9.07E-01 | -3.08E-01 | -7.48E-02 | 2.51E-01  | -2.96E-01 |
|                                  | u-95% CI | 6.69E-01  | 4.82E-01  | -3.63E-01 | 3.09E-03  | 3.60E-01  | 4.10E-01  | 2.83E-01  |
| <i>B. pratorum</i> (abundance)   | Estimate | 1.98E-01  | 2.10E-01  | 1.27E-01  | 3.85E-01  | -2.70E-01 | 3.78E-01  | 1.13E-01  |
|                                  | 1-95% CI | -1.25E-02 | 1.80E-02  | -1.14E-01 | 1.93E-01  | -4.91E-01 | 3.02E-01  | -1.08E-02 |
|                                  | u-95% CI | 3.96E-01  | 4.08E-01  | 3.67E-01  | 5.80E-01  | -4.78E-02 | 4.55E-01  | 2.35E-01  |
| <i>B. lucorum</i> (abundance)    | Estimate | 8.98E-01  | -3.03E-02 | 1.90E-01  | 1.92E-01  | 3.32E-02  | 8.89E-02  | -4.38E-02 |
|                                  | 1-95% CI | 7.59E-01  | -2.11E-01 | -5.93E-03 | 5.96E-02  | -1.37E-01 | 2.99E-02  | -1.50E-01 |
|                                  | u-95% CI | 1.03E+00  | 1.50E-01  | 3.97E-01  | 3.24E-01  | 2.00E-01  | 1.47E-01  | 5.86E-02  |
| <i>B. pascuorum</i> (abundance)  | Estimate | 9.17E-01  | 1.54E-01  | -1.63E-01 | 2.59E-01  | 4.39E-02  | 4.00E-01  | -3.09E-02 |
|                                  | 1-95% CI | 8.03E-01  | 2.17E-02  | -3.22E-01 | 1.46E-01  | -8.35E-02 | 3.47E-01  | -1.19E-01 |



**Figure S3. Effect of tree cover on the community weighted means of eleven visual traits relative to body size in bumblebee communities within grasslands across Sweden (n = 812).** The residuals back transformed to trait space from the simple allometric models were used to calculate traits relative to body size. Grey circles represent the original data. Dark lines are the estimated effects of tree cover modelled with Bayesian inference and shaded areas represent the Bayesian 95% credible intervals. Significantly positive and negative effects are drawn in red and blue respectively, while non-significant relationships are in grey.

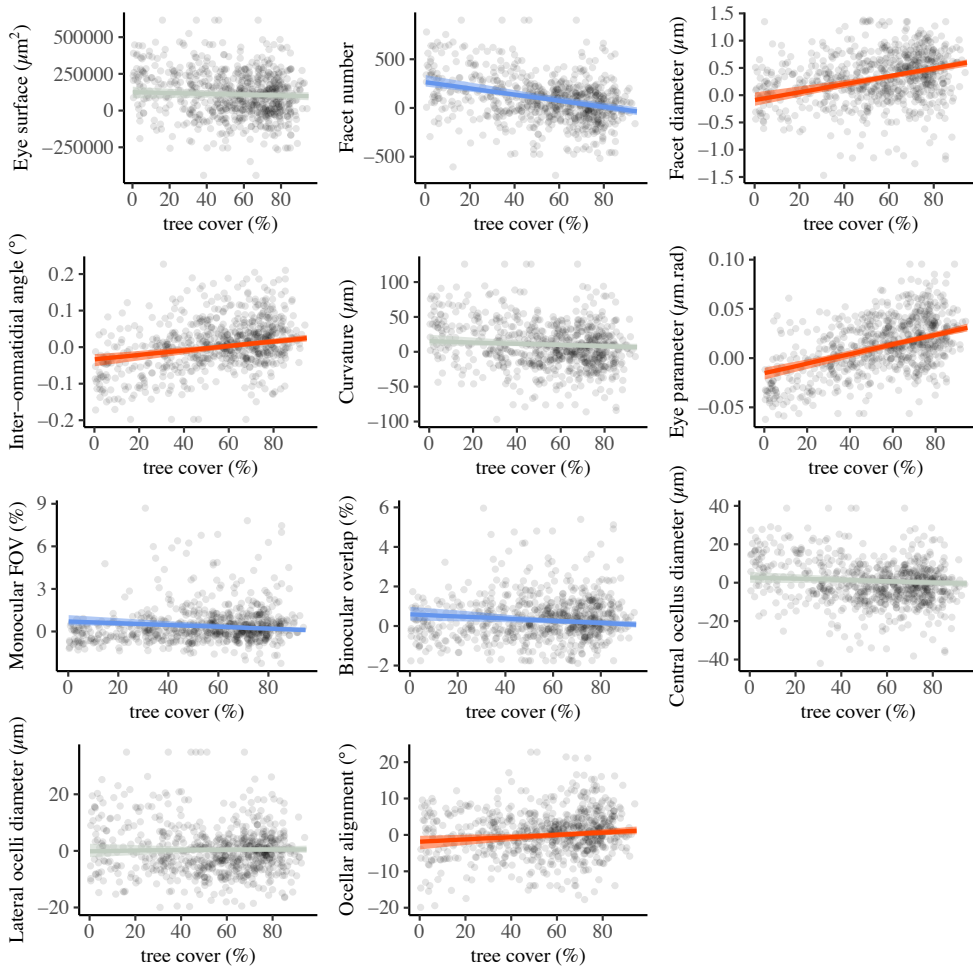

**Table S6. Summary of the effects of geophysical variables, tree cover and covariates on the community-weighted means of visual traits relative to body size modelled with Bayesian inference (Estimate: estimated effect, l-95 % CI: lowest 95 % credible interval, u-95 % CI: upper 95 % credible interval).** Significantly positive and negative effects are drawn in red and blue respectively, while non-significant relationships are in grey.

|             | Intercept | Elevation | Latitude  | Tree cover | Longitude | Floral resource | Latitude x Longitude |           |
|-------------|-----------|-----------|-----------|------------|-----------|-----------------|----------------------|-----------|
| Estimate    | 1.11E+05  | -1.69E+04 | -3.72E+04 | -5.75E+03  | 2.89E+03  | -8.65E+03       | -4.83E+03            |           |
| Eye surface | l-95% CI  | 8.99E+04  | -3.46E+04 | -6.07E+04  | -1.98E+04 | -1.23E+04       | -2.04E+04            | -1.61E+04 |
|             | u-95% CI  | 1.35E+05  | 8.58E+02  | -1.44E+04  | 8.11E+03  | 1.81E+04        | 3.13E+03             | 6.50E+03  |

|                          |          |           |           |           |           |           |           |           |
|--------------------------|----------|-----------|-----------|-----------|-----------|-----------|-----------|-----------|
| Facet diameter           | Estimate | 3.06E-01  | -1.01E-01 | -5.38E-02 | 1.69E-01  | -5.70E-02 | -2.98E-02 | -4.15E-02 |
|                          | l-95% CI | 2.52E-01  | -1.51E-01 | -1.18E-01 | 1.29E-01  | -1.00E-01 | -6.28E-02 | -7.41E-02 |
|                          | u-95% CI | 3.61E-01  | -5.15E-02 | 1.06E-02  | 2.08E-01  | -1.38E-02 | 3.20E-03  | -8.55E-03 |
| Inter-ommatidial angle   | Estimate | -4.70E-04 | 1.88E-02  | 2.26E-02  | 1.46E-02  | 5.58E-04  | -2.05E-03 | 5.58E-03  |
|                          | l-95% CI | -8.38E-03 | 1.22E-02  | 1.38E-02  | 9.52E-03  | -5.04E-03 | -6.33E-03 | 1.16E-03  |
|                          | u-95% CI | 7.74E-03  | 2.53E-02  | 3.06E-02  | 1.99E-02  | 6.11E-03  | 2.23E-03  | 9.69E-03  |
| Facet number             | Estimate | 9.65E+01  | 2.77E+00  | -5.86E+01 | -7.66E+01 | 2.72E+01  | -8.12E+00 | 4.78E+00  |
|                          | l-95% CI | 6.53E+01  | -2.40E+01 | -9.25E+01 | -9.82E+01 | 4.55E+00  | -2.56E+01 | -1.21E+01 |
|                          | u-95% CI | 1.37E+02  | 2.96E+01  | -2.36E+01 | -5.63E+01 | 4.97E+01  | 9.43E+00  | 2.24E+01  |
| Eye parameter            | Estimate | 1.10E-02  | 2.60E-03  | 6.80E-03  | 1.17E-02  | -2.29E-03 | -1.61E-03 | 4.21E-04  |
|                          | l-95% CI | 7.55E-03  | -3.03E-04 | 3.18E-03  | 9.49E-03  | -4.65E-03 | -3.45E-03 | -1.44E-03 |
|                          | u-95% CI | 1.42E-02  | 5.43E-03  | 1.05E-02  | 1.39E-02  | 5.87E-05  | 2.72E-04  | 2.27E-03  |
| Eye curvature            | Estimate | 1.04E+01  | -6.65E+00 | -1.14E+01 | -2.02E+00 | -2.30E-01 | -6.07E-01 | -2.29E+00 |
|                          | l-95% CI | 6.98E+00  | -9.95E+00 | -1.55E+01 | -4.53E+00 | -3.13E+00 | -2.81E+00 | -4.39E+00 |
|                          | u-95% CI | 1.42E+01  | -3.32E+00 | -7.13E+00 | 4.44E-01  | 2.67E+00  | 1.61E+00  | -1.36E-01 |
| Central ocellus diameter | Estimate | 8.26E-01  | -2.65E+00 | -4.19E+00 | -8.08E-01 | -5.75E-01 | 2.45E-01  | -7.92E-01 |
|                          | l-95% CI | -5.91E-01 | -3.80E+00 | -5.70E+00 | -1.70E+00 | -1.56E+00 | -5.17E-01 | -1.54E+00 |
|                          | u-95% CI | 2.21E+00  | -1.49E+00 | -2.54E+00 | 9.31E-02  | 4.10E-01  | 1.00E+00  | -1.36E-02 |
| Lateral ocelli diameter  | Estimate | 3.19E-01  | -4.50E-01 | -2.61E+00 | 1.41E-01  | 1.51E-01  | -7.64E-02 | -3.45E-01 |
|                          | l-95% CI | -6.20E-01 | -1.37E+00 | -3.82E+00 | -5.80E-01 | -6.44E-01 | -6.88E-01 | -9.49E-01 |
|                          | u-95% CI | 1.37E+00  | 4.76E-01  | -1.32E+00 | 8.33E-01  | 9.49E-01  | 5.33E-01  | 2.66E-01  |
| Ocellar alignment        | Estimate | -1.59E-01 | 5.14E-01  | 3.14E-01  | 7.69E-01  | 1.76E-01  | 3.12E-03  | -1.09E-01 |
|                          | l-95% CI | -9.80E-01 | -1.97E-01 | -6.20E-01 | 2.07E-01  | -4.52E-01 | -4.75E-01 | -5.68E-01 |
|                          | u-95% CI | 6.57E-01  | 1.23E+00  | 1.21E+00  | 1.34E+00  | 8.08E-01  | 4.82E-01  | 3.52E-01  |
| Monocular FOV            | Estimate | 3.76E-01  | 6.26E-01  | 2.02E-01  | -1.54E-01 | 2.68E-01  | -9.89E-02 | 1.96E-01  |
|                          | l-95% CI | 2.40E-01  | 4.89E-01  | 4.47E-02  | -2.73E-01 | 1.58E-01  | -1.84E-01 | 1.12E-01  |
|                          | u-95% CI | 6.06E-01  | 7.52E-01  | 3.59E-01  | -5.53E-02 | 3.79E-01  | -9.50E-03 | 2.75E-01  |
| Binocular overlap        | Estimate | 2.88E-01  | 4.54E-01  | 1.68E-01  | -1.22E-01 | 2.11E-01  | -7.20E-02 | 1.22E-01  |
|                          | l-95% CI | 1.42E-01  | 3.37E-01  | 1.39E-02  | -2.21E-01 | 1.11E-01  | -1.50E-01 | 4.67E-02  |
|                          | u-95% CI | 4.43E-01  | 5.71E-01  | 3.11E-01  | -2.25E-02 | 3.11E-01  | 5.74E-03  | 1.95E-01  |

1  
2  
3  
4  
5  
6

**Figure S4. Relationship between tree cover and species number in bumblebee communities within grasslands across Sweden (n = 812).** The grey line is the estimated effects of tree cover modelled with Bayesian inference and shaded areas represent the Bayesian 95% credible interval.

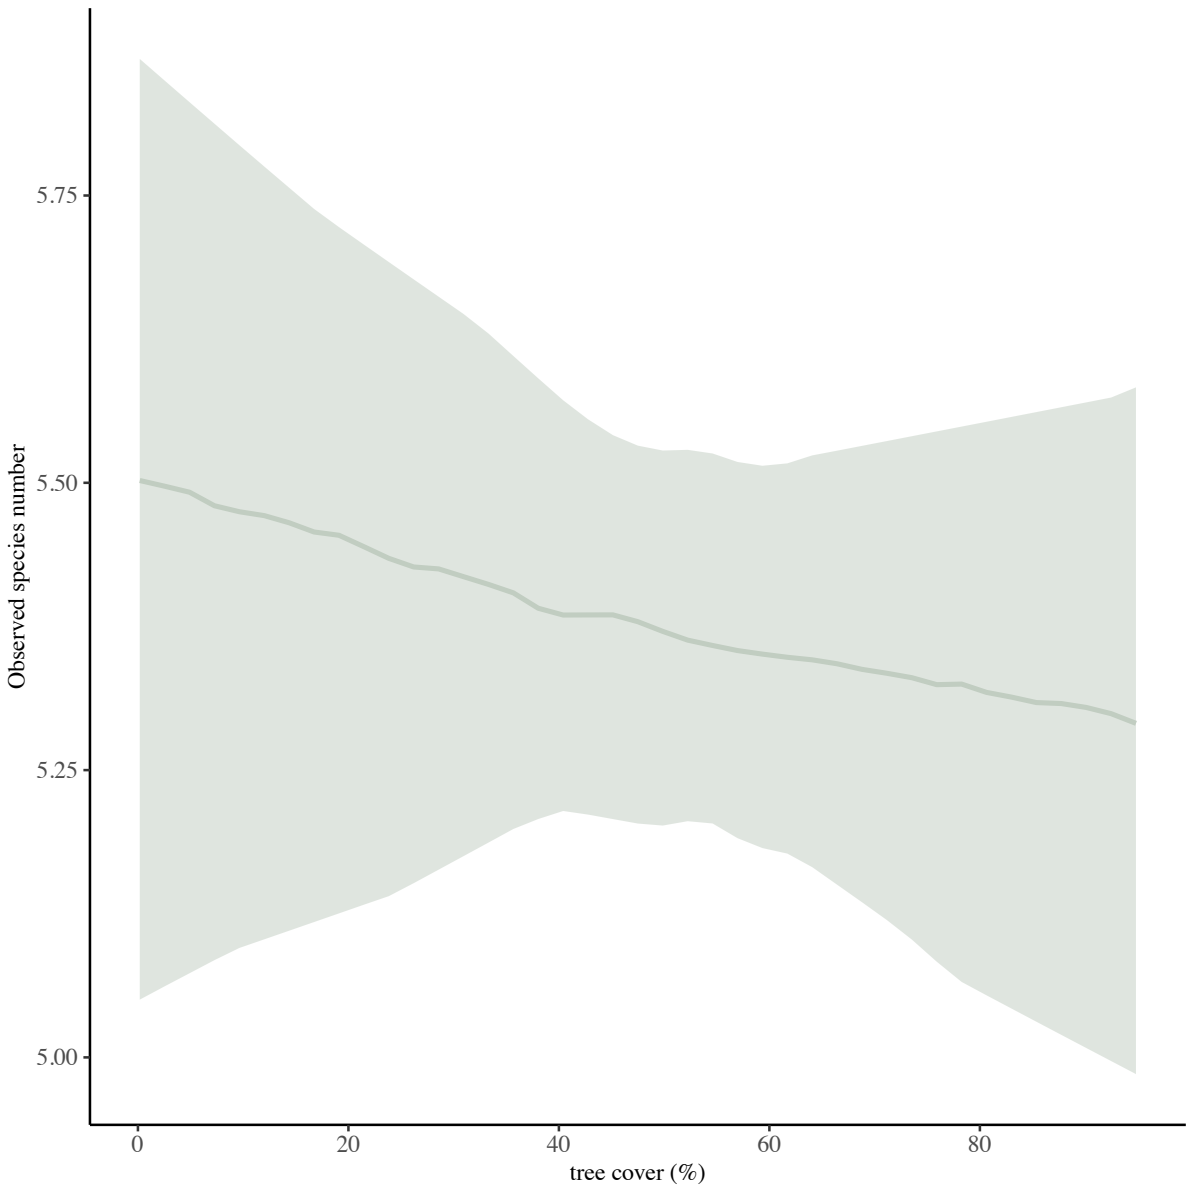

1
